# Supplementary material for: Manipulating the revision of reward value during the intertrial interval increases sign tracking and dopamine release
Source: PLoS Biol. 2018 Sep 26;16(9):e2004015. doi: 10.1371/journal.pbio.2004015 (PMC6175531; doi:10.1371/journal.pbio.2004015)
Supplement: S2 Data — (XLSX) [file pbio.2004015.s006.xlsx]

## Sheet: Fig 2a
				time (s)	-18.4	-18.3	-18.2	-18.1	-18	-17.9	-17.8	-17.7	-17.6	-17.5	-17.4	-17.3	-17.2	-17.1	-17	-16.9	-16.8	-16.7	-16.6	-16.5	-16.4	-16.3	-16.2	-16.1	-16	-15.9	-15.8	-15.7	-15.6	-15.5	-15.4	-15.3	-15.2	-15.1	-15	-14.9	-14.8	-14.7	-14.6	-14.5	-14.4	-14.3	-14.2	-14.1	-14
				60 ITI group	13.0469	3.33309	5.77492	3.2127	1.63604	3.19808	1.00666	3.38286	1.65573	3.48798	3.73854	-0.013676	0.122791	2.78923	-0.564763	1.47494	-0.726344	-1.41567	-0.636142	-2.90061	-0.32035	-0.159365	-1.19444	-3.34926	-1.25514	-1.18582	-2.59882	2.96311	-3.40914	-2.45973	-1.28938	-1.22217	-2.06519	0.273824	0.0949461	0.0759072	-1.64014	-4.62498	-3.2356	-2.17462	-7.28118	-2.59953	-7.59235	-3.64079	-5.78404
					-1.97318	-1.18437	-2.36863	-3.86459	-3.50636	-4.38934	-4.64397	-3.44743	-3.78006	-3.11872	-4.17607	-2.27703	-3.26112	-2.91747	-1.58054	-0.858531	0.922624	-2.33501	-0.6338	0.386188	1.71435	1.93024	1.61514	3.87404	4.10643	2.82266	3.61105	4.93106	5.13091	4.42954	5.36569	5.34386	5.25329	7.41084	7.08446	5.08133	7.29296	7.66941	7.03878	8.54405	6.94224	7.01175	6.19829	7.14839	7.37078
					1.874	1.35715	2.05877	2.13683	0.132524	1.40713	1.82719	1.33656	0.69818	-1.06536	0.287674	-0.182318	-1.27538	-0.280465	-0.331708	-1.63492	-0.495415	-1.04988	-1.47106	-2.23412	-1.66833	-3.17681	-3.15011	-3.71672	-2.82038	-3.17234	-4.73872	-2.94306	-2.06648	-4.60646	-3.06872	-2.57091	-4.19242	-5.04169	-3.79795	-7.30977	-5.1266	-5.88105	-5.36697	-6.67326	-5.03561	-4.97538	-5.87696	-8.04873	-6.34491
					0.109111	1.92367	3.2799	1.49875	2.14802	0.749484	-8.27365	5.62116	1.0461	0.0155668	0.886039	0.0375434	-0.473889	0.995539	1.92547	-0.11669	-0.878386	-0.080934	1.33752	0.964621	-2.09008	-4.56704	-1.04818	-4.52735	-2.8519	-1.92806	-1.46042	0.114582	-2.21629	-4.20285	-1.18426	0.179718	2.01463	-1.00279	-1.72657	3.98576	4.35905	-1.01709	-3.16504	-3.29592	-2.69455	-0.144677	-0.859659	-2.21078	-3.86078
					-1.87939	-2.46327	0.0601314	-1.03466	0.37582	-1.68081	-1.46943	-1.22675	-1.3845	-0.92785	-4.86041	-2.22557	-1.61069	1.91514	-0.413788	-2.57279	-2.55973	0.233113	-0.498445	1.92943	1.84236	0.600683	-4.45443	-0.527033	21.2911	2.12295	1.38204	0.816768	-1.52286	1.91997	0.802116	2.58097	0.44881	1.86349	-0.417703	0.678478	1.88743	0.729111	1.60911	-2.21971	6.9385	1.3027	0.191271	0.167776	-0.463267
					-2.42389	-0.345282	-1.23266	-5.05344	2.37978	-0.606213	-2.77279	0.100206	-0.15983	-0.310135	-1.94572	-2.00478	-1.47174	1.60401	-0.534053	-0.687345	2.36106	1.57801	1.99584	0.864619	2.59968	0.180996	2.87039	1.18302	0.366021	0.745497	0.531832	2.05827	4.5811	1.06188	1.13249	1.53776	1.4795	1.81707	-0.341503	2.23073	1.77023	1.11458	3.21017	3.63145	3.26594	2.14159	2.6717	2.9844	2.23237
					-2.20662	-1.44316	-1.34585	-1.51702	-2.9757	0.976743	-0.776931	0.118274	-0.202401	-1.23808	-0.0628839	-1.83977	1.06324	1.79637	0.236218	1.82757	-0.137568	0.117316	2.87508	0.141061	2.98748	-0.0273817	-0.484399	-2.00394	-0.111893	-1.84686	0.399075	0.858431	-0.479658	-0.903154	0.994421	0.0654043	-1.02813	-0.766505	4.98214	2.50319	2.17493	-0.136623	0.278227	1.16346	-1.41359	-0.054274	-1.76326	-3.28572	-0.945807
					-4.56044	5.21414	-0.252351	-1.99211	-0.576741	-3.80478	-1.92508	-0.92769	2.13884	-1.9917	-2.31038	-1.73918	0.755128	0.467885	0.871817	1.23799	4.08055	-3.49436	0.673038	-1.77198	-3.6785	-3.08401	-3.69847	-1.22811	-3.68146	-1.81324	-2.5499	-3.36735	-1.88455	1.51329	5.04029	-1.90749	-0.781661	-1.60821	-2.93162	-5.56893	-4.59146	-3.87063	-1.357	-4.17109	-3.4106	-7.12	-7.40313	-5.28354	-6.45974
					1.50497	-0.731216	3.6671	1.47949	5.19909	2.72359	4.16536	1.08212	3.07011	1.98732	2.09975	1.36925	5.09695	0.443993	0.757023	0.98457	4.90431	3.03867	-2.56191	5.14535	3.57516	-0.185383	2.99148	-0.436558	2.8039	-0.762312	-0.365216	-2.74011	-3.23802	-4.12955	-3.58938	-4.15042	0.648821	-0.133653	-0.855844	-2.96337	0.82395	-0.863807	2.3644	-0.464	-0.588437	-2.12394	1.70365	4.39449	0.177846
					-1.21969	-0.748089	-2.28068	0.561879	-1.52815	-0.909751	1.20842	-0.0555347	1.44768	-1.21401	0.563972	1.47344	0.563519	0.413155	0.342888	0.919727	-0.52748	-0.166092	0.34054	3.01913	-0.553061	2.34671	-0.80712	0.53036	1.52246	1.20577	0.592691	0.246068	-2.2326	0.387137	2.17062	-0.0429619	1.50367	1.03135	0.85387	0.129777	1.07625	2.48737	0.555024	2.74711	1.59659	1.34865	2.78679	0.514031	-1.00395
					-0.573748	-0.280612	-1.33529	0.0448293	-1.06464	1.12889	0.564771	0.891211	-1.57477	-1.58598	-0.716891	0.954418	0.799267	-0.593027	-1.0686	3.15672	-1.73886	-1.0881	-2.43591	-0.197122	-0.90546	-1.21577	0.147988	-0.0514685	-1.26225	-1.57029	-1.33307	-1.07694	-3.10656	-2.53655	0.00319387	-1.8236	-4.25615	-3.34347	-2.21718	-6.08999	-2.88551	-2.01235	-2.9395	-1.76252	-3.68171	-4.50743	-5.41957	-8.175	-5.09639
					1.3281	-0.740868	-4.50046	0.382939	0.88329	2.50897	3.53603	0.766554	-2.24143	-0.423294	1.65899	-0.679959	-4.88871	-0.195536	0.452111	1.94485	2.17417	-1.4635	-1.48463	0.351489	-2.54504	1.09173	-1.56262	-0.0310362	-0.982175	2.83176	-2.436	-4.25203	-0.597218	2.35442	1.27692	1.06953	-4.18624	1.16478	-0.712304	0.872117	1.76104	-0.709719	1.14072	-3.50352	0.520269	-2.67539	-3.52978	-1.74057	-0.686363
					0.974477	0.693917	4.98888	-0.417442	3.62861	7.19221	3.33664	5.45106	6.27226	3.24144	2.43241	3.22265	1.75923	-0.429602	0.346158	-4.17413	-2.0272	-3.51472	-4.49187	-3.20888	-2.49048	-4.67723	-2.59814	-6.00162	-3.04205	-5.53055	-5.26639	-2.5195	-1.7679	-0.540344	1.2219	4.35514	5.24258	1.96133	-0.585926	6.06531	9.76748	12.5068	16.778	14.0518	13.2697	11.3455	9.86333	8.91609	14.8775
					-0.704229	6.38614	2.40857	2.12127	4.97636	5.43939	2.62878	3.15016	3.04674	-1.66651	5.30654	3.48822	1.94046	3.25079	0.302338	-0.709767	3.02158	0.367053	-0.660257	-1.04521	-1.08034	-2.57687	-1.90531	-4.53594	-3.7096	-4.01494	-4.15134	-3.09611	-1.43558	-4.94943	-3.44987	-1.51005	-3.62173	-1.85335	-2.71767	-2.57775	-4.0575	-4.6385	2.0327	0.752763	-2.7277	-2.42662	-1.69437	0.669658	-1.62589
					3.12451	1.91849	4.191	2.41407	2.21944	2.91683	3.24717	0.141119	0.86923	-2.21183	2.38028	-0.606826	1.08288	0.867962	-3.23653	-6.64165	-0.275013	0.939921	-1.96357	-4.59494	-4.22388	-1.79433	-2.05102	2.00205	-2.49273	-1.67118	-0.570373	-3.79291	-2.20835	-0.588782	-0.706434	-2.19937	-2.51767	-5.40104	-1.12815	-2.39678	-3.49202	-7.1246	-5.58054	-5.75979	-4.51265	-4.29994	-7.70264	-5.72422	-1.30451
					0.146807	1.68557	-0.0767488	-0.0628386	0.94837	2.27678	1.32641	4.08549	1.04532	-0.945204	2.26445	1.54859	-1.21032	-1.74133	2.1391	-2.14912	-4.28588	-3.00653	1.1483	-4.00549	-1.88545	-0.942592	-1.69839	-0.648789	1.00876	-4.10406	-0.378961	-2.55303	-2.02825	0.369198	-1.84559	-1.06556	-1.22392	-3.14619	-2.31734	1.58641	-0.340256	0.199903	-0.274982	-1.64988	0.00451577	-0.765957	0.49856	-0.354494	-2.02949
					-1.31814	-1.0672	-1.47036	-1.91036	-3.87354	-2.77167	-0.554441	0.343961	-0.628229	1.24477	2.52814	1.75513	0.61213	0.774775	2.51934	0.67412	1.29979	1.49678	-0.124634	0.245141	0.973805	1.94588	-0.18162	0.114368	0.193581	-1.11884	-0.484201	-0.27927	0.722411	-1.89651	-0.744158	1.42184	-1.3545	-0.939314	-1.51193	4.60606	1.32961	0.937626	-0.931767	-1.04626	-0.269472	-0.402504	0.329288	-1.84758	3.02138
					1.94422	-0.0651363	3.62724	0.51391	-0.380743	0.711311	2.8015	-0.205129	1.76406	0.0953514	-1.72997	2.5979	-3.69202	0.191215	0.514621	-1.61724	0.865459	-0.320281	-0.717144	0.438282	-0.24817	0.677876	-1.37395	1.46015	-4.47348	-4.39619	-3.85719	-4.07303	-2.02867	-2.5378	-3.68914	-1.06796	-1.43891	-3.28333	-0.135975	-3.06895	-3.60584	-3.87445	-1.82622	-2.18531	-1.34362	-5.53668	-2.39608	-1.81984	-2.39864
					0.71556	-0.726635	-0.0493419	-2.71926	0.208025	-0.823927	-0.282311	-1.17978	-3.03139	-0.132847	-1.34474	0.415931	-1.94345	0.843453	-1.42835	-1.13665	1.7419	-0.60883	-2.61223	-1.01836	-1.54791	1.6624	-1.5059	-1.72873	-0.310648	2.02019	-1.32948	2.67629	3.80944	-0.112074	4.30007	3.17732	-0.658197	-1.82831	0.923185	-0.756273	1.88209	-0.504019	1.81521	-0.566362	0.96446	-0.631547	-0.71417	-0.239102	2.21909
					-1.7291	0.88344	0.29658	2.57928	-1.16161	0.731368	1.91899	3.00319	-0.257661	-1.19742	0.0373271	4.18532	0.193365	-2.68665	-3.67606	-0.499169	-3.17579	-3.23505	-2.0144	-0.562746	-0.441309	-1.9082	-1.4293	-0.920015	-4.3096	-5.69688	-0.581595	-3.1268	-1.03894	-3.14972	-3.18366	-2.91991	-0.069557	-0.237534	1.20249	-3.30989	-0.373113	0.287745	1.29984	-0.0547362	0.149247	-0.689355	-2.93228	-0.838007	-1.96477
					0.346529	1.54778	-0.793207	-0.123737	-1.95963	0.154823	-0.140704	-0.543766	-0.274877	-1.80509	-1.54947	0.773057	-0.402355	-0.313487	0.833718	-0.297044	0.103747	0.716715	-1.17369	-2.40687	-3.9518	-1.17049	-0.636347	-0.624891	-0.0786976	-2.53589	0.548812	-1.99522	-0.677821	0.977487	0.164047	-1.3419	-1.72028	-1.05999	-3.67207	-2.89992	-2.51465	-2.20285	-2.32119	-4.36359	-5.89888	-0.823029	-0.924363	-1.57555	-1.45804
					-1.33245	1.57437	-0.257586	-1.14858	-1.66106	-0.825124	-1.35321	-2.03594	0.819648	-1.4732	-0.647591	0.0495023	0.314679	-0.845746	0.923756	-0.398972	0.858714	0.39863	0.607679	0.0347017	-0.374882	0.140926	-0.102598	1.33349	-0.406919	1.06162	1.20724	-0.771688	-2.11574	0.992225	1.04587	1.58702	1.40935	0.767579	2.96368	0.0988788	0.707415	0.783144	1.04032	-0.28941	-0.840357	0.156652	-0.262169	-0.326409	-3.11581
					0.733044	-0.557899	0.188668	0.161192	0.374066	0.136522	-1.39428	-2.00203	0.230155	-0.561646	-0.527874	-0.952723	-1.98295	-2.46293	-2.1797	-1.13017	12.4205	11.2545	8.01765	-3.36243	-4.38045	-4.20492	-3.87519	-2.56576	-1.59184	-4.60366	-6.4276	-2.5541	-0.847271	-0.0735733	-3.24927	-2.16179	-1.73431	-0.712452	0.0586404	-1.42676	-0.623845	-3.19877	-2.67553	-1.6546	-2.10932	-1.49345	-2.0582	-4.59991	-3.61609
					0.10398	-2.294	-1.02024	-0.626355	-1.45019	-0.387496	0.00032168	0.255296	-1.43087	-0.839508	-1.46392	0.117679	0.505825	-0.374427	0.57523	2.31673	0.875661	4.20568	3.03662	-0.634652	0.124586	1.37232	-0.0337371	0.821341	0.658524	0.757245	-1.65413	1.10626	1.13024	1.5968	1.84022	2.35608	0.984104	0.523286	1.70858	0.322002	1.9552	-0.831132	0.676401	0.126713	0.758998	1.60303	2.1044	0.0927681	0.82527
					-0.164569	1.50526	2.41771	0.811276	1.6652	0.951081	1.53257	-0.834952	-1.15799	0.239295	-1.1659	-0.174984	-0.476593	1.04459	-2.86617	-1.05383	-0.209169	-1.45367	-0.596362	2.02228	0.699822	-0.506223	-1.33948	-1.68218	-1.40116	-0.0333035	-1.19552	-1.18633	0.406239	-1.06971	-0.384729	1.15971	0.911137	2.16008	0.0486353	0.698193	1.42614	1.91703	2.67586	2.06928	0.709604	2.03093	3.89172	3.42055	2.887
					0.396203	-2.04128	1.5488	0.406706	0.813976	1.78115	-0.205363	-1.09271	-1.35788	-1.42816	-1.66591	-1.16994	-1.25434	-2.45902	-0.538784	-0.726288	-2.69008	-2.68099	-0.998809	-1.1672	0.0509015	-0.429528	0.0449686	1.37749	1.86606	0.602068	1.89062	3.2837	1.15682	0.482057	2.49966	0.300133	1.67569	2.79022	2.50287	1.41277	2.15898	0.616825	1.27642	0.434294	1.30682	0.648415	0.10654	2.26955	1.38494
					2.63469	0.102689	-1.4354	-0.75277	-0.911209	-0.938613	-0.199691	0.223895	0.224358	-0.119054	0.777055	-0.783328	-2.54352	-2.79641	-1.72337	-0.562828	-2.58851	-1.63205	-2.83328	-1.14727	-0.479929	-2.29865	-2.82461	-3.73504	-2.84374	-0.249158	-0.38221	-0.523179	-1.78568	-1.77885	-1.69847	-2.41828	-3.96808	-1.892	-2.32691	-2.73272	-2.38555	-3.49726	-3.43984	-0.495708	-2.59682	-0.671635	-1.44113	-0.757853	-0.554019
					3.04665	0.7256	0.40012	0.789918	1.16363	0.369785	-0.134178	-0.115175	1.35892	-0.367558	0.139322	-0.717449	-0.449561	-0.32506	-0.361519	-1.06426	-2.49787	-0.695032	-1.13713	-1.47783	-1.29362	-0.404533	-2.69965	-0.881237	-1.88281	-2.03257	-1.41108	-1.85857	-2.72081	-4.30741	-3.29767	-4.77088	-3.83911	-3.78317	-4.40294	-3.61556	-4.0897	-3.50109	-4.10004	-3.65753	-2.59159	-4.4754	-4.42202	-4.37148	-4.83303
					0.741566	1.65294	1.34817	0.894809	-0.43112	1.15041	0.334704	1.19379	0.725307	-1.47858	-0.741489	-1.38943	0.568437	-0.152372	-1.54058	-0.0380431	-0.301994	-1.57365	-2.25988	-0.313855	0.718812	-1.29518	-1.76396	-0.812108	-0.928168	0.430536	-0.741638	-1.47656	-1.48942	-2.74209	-1.19774	-0.327045	-0.409397	-0.843352	-0.617946	-0.723454	-1.14729	-0.311557	-1.63753	-0.481141	0.293427	-0.0696308	-1.14406	-1.57016	-2.02053
					0.248289	-0.146719	1.01783	0.802706	0.327355	0.0992558	0.601609	-1.4195	0.300095	-1.21919	1.23956	-1.17321	0.643499	-0.584105	0.15167	1.54684	-0.375664	-0.00179646	0.790383	1.71821	0.915808	-0.293546	-0.54562	1.07311	1.00738	-1.66657	0.44682	-1.03856	-0.16754	-1.33199	-0.38067	-0.804033	-1.53213	-1.18299	-1.84223	-1.34834	-2.31327	-1.65008	-0.592479	-0.987698	-3.27831	-4.16216	-3.18177	-4.94897	-2.70363
					3.50021	2.37034	0.18415	1.85485	1.94755	2.58871	-0.877073	-0.978652	0.460724	0.350723	-1.46076	-1.65494	-1.45289	-1.0942	-1.60015	-0.0237175	-1.71404	-1.8498	-2.23519	-2.7685	-2.08778	-2.68444	-1.44298	-1.28118	-0.315474	-0.957173	-0.892893	-2.35659	-2.19265	0.629823	-3.58279	-1.78422	-3.3782	-3.97104	-2.06462	-3.19195	-3.84381	-4.65713	-5.70715	-4.72159	-5.46517	-6.38391	-5.25826	-6.49264	-6.18717
					-1.46486	-0.76041	-0.858414	-2.9103	-3.41618	-0.747548	2.03304	-1.47412	-1.74117	1.4605	1.20032	4.03751	0.263236	1.7207	2.39686	1.80379	1.7731	-2.03267	-1.18626	0.669242	5.19716	0.0824505	0.130804	2.13114	1.9674	-2.51408	-1.1308	-3.35014	-2.21493	-2.30308	-2.31475	-3.31642	-4.11395	-2.43821	-3.79909	-6.08212	-1.66191	-1.2948	-5.38025	1.31165	-3.53543	-3.11473	-4.74569	-3.15982	-8.24453
					-1.34087	2.38819	4.45445	-0.542202	-1.08271	3.13291	7.46091	-1.45396	1.58956	-4.00287	-0.77246	0.5528	2.54699	-1.91326	-1.12003	2.55676	-2.52243	0.314305	-3.5911	-6.10942	-2.50619	-0.127527	-2.44103	0.469933	-3.27521	-2.24868	3.64433	-4.057	-0.739788	-4.75524	-2.30458	-1.55132	2.28993	-3.49166	-0.176459	-1.89356	-2.36158	-1.54222	-2.67298	-1.2421	-1.95344	-1.0702	-2.19124	-5.62037	-8.08145
					-0.938656	-3.96073	-6.25046	-0.739309	1.06709	9.67411	3.78755	3.10702	4.63178	5.09412	0.629911	-2.15642	-0.291481	5.74326	4.11737	4.7544	-3.7806	0.747795	3.42608	9.80113	8.0092	5.95793	8.71851	-0.159734	-2.46789	0.618489	-5.84525	-2.68558	-0.334305	0.0663421	4.60259	-4.01683	-3.00089	-6.70119	-3.68414	-5.57439	-5.2482	-3.22623	-1.5641	-3.01094	-3.44318	0.908051	1.69745	2.36341	-0.265417
					-2.49275	-1.70961	4.96866	4.45911	1.4139	0.217204	0.187055	0.0363324	-1.24791	-4.60243	-2.89159	-4.81518	2.30758	-0.497353	-2.5353	2.049	2.08431	-0.47186	-3.52929	-9.17677	0.0954721	-0.622596	-2.85772	-3.81348	3.35449	-1.51871	3.77764	3.69448	1.72981	4.89632	-2.30904	-4.08546	-5.38783	-4.10406	-0.222368	1.70413	-5.46942	-10.3741	-1.055	2.94035	-0.0059039	-3.25457	-1.08726	-5.46482	-8.02806
					0.452944	0.259695	-1.01341	-0.0471175	0.0140936	-0.51372	2.19665	0.353755	1.73559	0.468738	3.69235	-1.24882	-2.1673	0.472353	-0.43156	-0.215738	1.70143	-0.8523	0.273458	-1.11567	-3.24898	-2.39571	1.35983	-0.232708	0.726284	-1.27107	1.19511	-0.557144	-0.00471146	-1.2674	0.754844	1.23501	-0.875815	-2.13065	-2.22433	-1.73121	-1.08501	-1.63245	-1.14068	0.695114	1.23971	-2.24062	-3.56998	-1.14905	3.83224
					6.54829	1.71874	-3.73741	4.69262	2.51341	3.95037	-1.73633	-10.4903	0.677408	-4.6362	-0.268314	-3.73415	4.02448	-0.449737	-4.69182	-0.323413	2.56388	-4.95214	2.37723	-5.35469	-3.63916	-2.99722	-4.35625	1.05102	-4.47207	-7.25421	1.94967	1.0387	0.650165	-4.02992	-1.11597	-0.08918	-1.90248	0.213578	0.571136	-1.66209	0.586183	4.04388	6.85323	4.41384	-2.4578	2.20553	0.428284	1.0519	-4.97132
					-0.491794	1.07131	-1.64861	-4.35997	-2.85188	2.67433	-1.34915	0.249461	3.94857	-1.84061	-3.48368	-1.96146	0.617599	-4.04289	-0.610937	1.58309	-2.2862	-2.78298	-3.74734	6.57597	4.26319	5.41817	-1.91405	-2.56135	1.65068	-0.431858	5.68113	-1.24991	-1.10151	-0.337149	3.10174	2.63796	0.754141	-0.576762	2.56757	-0.75193	-1.83219	2.99146	4.27397	2.73735	0.184355	0.799778	0.553644	0.878661	-0.000836688
					-3.13799	-2.34378	-3.61534	-3.29538	-1.88998	0.0425701	2.42496	0.612593	-1.96912	0.298678	1.75052	-1.95718	7.30051	-1.64028	-0.711492	0.171113	1.73286	4.32833	1.11602	2.30622	2.05152	1.5175	0.232026	0.468512	2.94509	0.835413	0.947624	0.710065	0.664844	-0.737768	-3.13654	-3.17716	-2.15004	0.300422	-2.59135	-4.42315	-1.23392	-2.72387	-4.16292	-4.96964	-3.91514	-0.993854	-4.00674	-1.51653	-3.42925
					-1.95895	-0.713342	-2.65609	-3.04902	-2.32867	0.654122	0.658896	0.477575	-0.135026	1.37567	0.951076	1.95633	0.649678	2.5112	1.08816	2.30967	3.04863	1.09905	1.15728	2.04424	2.31813	2.24434	0.226652	3.98922	3.95497	3.32804	3.15837	3.7505	2.80933	2.34636	3.8365	1.98074	1.68727	2.82892	2.93836	3.19603	3.15168	6.59338	4.79028	2.48987	1.04064	3.85327	2.84121	4.53154	3.34944
					0.0779915	0.941554	1.29953	2.15968	3.02195	4.04528	1.47749	-0.00201495	1.12832	-0.237903	-0.519666	-0.838246	-1.64542	-2.4211	2.03217	1.84291	0.588283	0.649324	2.28833	-0.172713	1.38735	-1.60778	-0.429546	4.63892	1.50689	-2.41975	-0.392931	-2.22455	-3.09562	0.869146	-0.814908	-2.46646	-3.32597	-1.9987	-4.04445	-2.67921	-3.25489	-1.55273	-2.8482	-1.00189	-2.87183	-3.89923	-1.47658	-0.0432995	-0.539149
					-1.08398	0.53299	1.91666	-1.32927	0.272659	-0.555667	-0.994077	1.97137	-0.560745	-0.597592	-2.51941	-1.56344	-2.80043	1.0248	-0.786603	-1.14275	-1.76667	-0.41344	-2.57762	0.227192	2.42775	3.0159	1.64738	2.82942	2.97141	2.19354	0.944488	1.80447	4.05383	4.098	-0.0518208	0.83151	-0.258613	0.0362138	3.58441	2.42749	0.890731	-0.537957	0.604089	4.18484	3.08055	3.55919	5.4283	4.34529	2.6011
					1.83065	-0.857499	0.531417	0.620485	1.88598	0.572472	-1.5491	-0.404066	3.46849	2.37346	1.09985	-0.485579	1.00789	0.57256	0.848367	-0.932024	-1.79155	-1.60251	0.22077	-1.1496	-0.542905	-3.05002	-2.84406	-0.324958	-2.15881	-3.13732	-1.65553	-3.78212	-1.69641	-3.61602	-2.47839	-8.76761	-6.84949	-5.33024	-6.0066	-6.32892	-6.46169	-9.09598	-6.20477	-7.69649	-7.55099	-5.25791	-7.17837	-6.47608	-7.25888
					-1.41694	0.697826	-0.308817	-0.0756804	0.459936	1.62671	1.10136	0.760588	-0.663362	-0.526259	1.25412	0.511035	-0.208743	-1.16599	-0.128286	-0.472062	-0.237695	-0.273229	-0.17255	-1.00619	0.088272	-0.337764	-1.45181	0.0475456	-1.25342	-0.201194	-0.971851	0.458167	-0.86129	0.859993	-0.511885	-0.544917	-0.421361	0.411487	2.0437	1.50496	-0.880257	0.0130384	0.519567	1.70311	1.03225	3.34588	0.81674	1.8894	2.12758
					-1.71944	-0.443759	-1.79238	-1.20326	-2.34771	0.778738	-1.02356	-0.712489	1.69828	-0.57503	0.818048	-0.256399	-0.0641639	0.126941	-0.0973049	-0.793757	0.107979	0.0494796	0.655541	-0.85109	0.100824	-0.59203	0.572246	0.0408915	-0.621715	-0.516254	0.950271	1.08112	-1.01796	-1.24789	1.07916	-0.331697	-0.862689	-0.844858	0.507552	-1.16312	-0.709947	-2.27332	-1.20789	-0.71078	-1.04848	-2.42549	-1.74486	-0.6763	-1.91129
					3.43884	1.75599	1.58046	1.03844	1.02427	1.76201	1.65608	-0.266941	0.732362	0.0904383	0.407555	1.92416	0.164435	0.32875	0.238681	0.125074	0.508742	0.863495	-0.90513	-1.99321	0.0240409	-1.9829	-0.792549	-1.51018	-2.88189	-0.647279	-0.473176	-2.09531	-1.55368	-4.28004	-4.23994	-3.74117	-5.66075	-4.74993	-2.44707	-5.23695	-4.18131	-4.16751	-5.37922	-2.4649	-5.44815	-2.99872	-4.08558	-3.35099	-3.5011
					-0.0986804	-0.364493	0.212484	-1.15466	1.90926	-1.3236	0.279385	-0.199685	-1.10844	-0.9398	1.71262	-1.57441	-1.54009	2.00537	0.67402	-0.364331	0.0549238	0.0548721	0.831654	-0.766395	1.68707	-1.75792	3.6658	-1.83592	0.186836	-0.278822	-0.724249	1.77487	0.320626	0.403127	0.416287	-0.139949	-0.785213	0.25886	-0.965666	-1.1783	-3.03377	-0.0972545	1.82208	0.102105	-1.8294	-0.365439	-0.348907	0.627907	1.04782
					-0.887878	-1.73351	1.26363	-1.89335	1.69018	-2.09757	1.17449	-0.986051	-0.526404	-3.25806	-1.03926	-0.51957	-2.30849	-21.3959	3.97641	4.1923	4.16734	3.46758	4.03944	2.12234	0.157901	4.98097	4.45376	3.25415	4.72387	4.72615	-0.55961	4.72072	1.99889	0.665395	4.52945	-0.326009	7.62486	4.73936	3.45833	4.24595	5.49599	4.60543	6.01959	4.59746	6.27668	5.10327	4.5052	5.39573	4.8532
					-2.30783	-1.65335	-2.84679	-3.12711	-1.15875	-1.77417	-2.34153	-0.749495	-0.211254	-0.368412	1.20883	1.02767	2.40008	1.71723	2.97684	1.37942	3.8298	3.73195	3.84285	4.75308	5.21623	3.28527	4.19571	3.39559	4.55414	4.90012	3.86468	4.89386	5.10612	5.40284	5.15	4.78611	6.07321	5.38136	6.79768	6.63413	5.39452	6.09488	5.3111	5.08129	6.43101	6.43816	7.27091	6.32462	6.10429
					-2.30904	-1.30364	-6.8645	-3.02161	-1.00345	-2.10957	1.87696	-3.45713	-3.05951	-3.23269	0.301242	-5.48153	-2.0967	0.217535	0.508164	0.399589	4.4469	4.69272	5.45552	5.95357	8.80976	-0.811732	8.13185	6.54479	2.65503	3.72005	0.734458	3.21911	1.60507	1.95051	0.685204	0.616553	-0.0440873	1.9659	1.33156	3.37485	2.24769	0.870256	4.97225	0.0269715	-1.26537	0.274301	-1.53686	0.839481	2.22406
					-0.66638	-0.791423	-3.17634	-0.862823	0.892824	1.39812	1.30062	-2.1881	-1.09653	-0.690997	-0.771034	-1.3232	-0.284868	-0.274233	2.10735	2.88859	1.95929	0.278551	-0.719188	0.0398662	2.97343	-1.8463	1.23122	-0.0903563	-0.172161	-1.08563	2.66644	1.1725	3.72108	1.513	1.86159	-0.870189	1.50974	1.74002	4.19274	2.22081	0.618787	2.1411	3.19305	0.933298	1.17593	-0.272585	-2.27304	-2.66875	-1.64236
					2.81149	2.07037	4.48422	0.479051	0.593223	0.0103277	-1.76447	1.46638	0.614359	0.927419	-2.25361	2.27758	-1.16401	1.38049	1.42421	2.53945	1.04469	1.79626	1.34323	-0.808753	-2.50685	-0.76616	-0.735753	-0.916851	-3.79178	-2.76657	-1.33096	-3.83119	-3.01059	-4.55273	-3.87973	-6.75115	-5.54089	-6.75404	-7.40833	-5.72327	-6.68256	-4.12748	-7.38082	-7.69676	-7.79667	-7.34957	-9.14378	-7.42968	-8.01049
					3.27597	3.57979	2.11254	3.05918	4.17968	0.316814	-2.60968	2.91668	0.353273	0.329794	3.28297	2.10861	-1.42626	1.46625	1.2582	0.17309	1.44002	-0.791027	-0.40452	-0.858538	-1.46144	-3.46602	-2.08109	0.972628	0.661747	-0.703412	-0.68765	-1.27109	-2.70298	-1.01647	-0.757722	-0.497587	0.823595	2.04497	0.889948	2.12789	2.56735	1.99898	2.40854	0.634502	1.0123	1.1913	1.84433	2.40104	3.14518
					0.854125	1.28911	1.91917	1.15229	2.53204	1.19821	0.719857	2.43547	-0.931574	-0.486927	-2.47259	-1.61544	-4.34987	-1.90703	-2.01136	-0.830727	-2.13615	-3.68679	-5.11332	-3.52985	-5.84895	-4.48084	-3.30679	-2.21673	-2.38662	-1.78927	-0.436574	-0.358721	1.82702	2.24219	0.490414	0.300406	0.704708	-1.56384	-2.51198	-3.06347	-2.18225	-3.01486	-3.28758	-6.13193	-4.03741	-7.74967	-7.04278	-8.05554	-6.65087
					0.618485	1.1423	2.60451	1.3044	0.946219	1.01192	-0.620383	0.43295	-0.49687	0.916735	0.231652	2.04744	-1.22601	0.291012	-0.970527	-0.560024	0.323967	0.21157	-1.83718	-1.29604	-1.27649	-2.25957	-2.14095	-2.69894	-1.37305	-0.843676	-2.49481	-0.362905	-3.72536	-2.54844	-4.3266	-4.77559	-4.07122	-5.04696	-3.2463	-5.74011	-4.78604	-5.01658	-3.04307	-3.63493	-1.66359	-2.10431	-5.40131	-7.4585	-6.10728
					-4.11544	-5.24414	-3.44233	-0.767985	-1.75705	-2.55102	-0.800878	-2.05701	-1.11866	-0.172996	-2.11387	-0.50617	0.246028	2.45356	0.357785	1.24447	1.44231	1.8676	1.25862	2.20879	1.26753	2.26058	2.9588	3.92119	1.31858	0.24139	1.59564	0.322691	2.45519	0.868449	2.31548	2.23383	2.62908	-0.473671	-0.356755	0.764306	2.14524	-0.489171	0.505425	-1.56419	-0.0959896	-0.905565	-0.225086	-0.892115	-3.2732
					2.07092	-0.934122	-0.578663	-0.353341	-0.776484	-0.867228	-2.195	-1.9939	-2.29825	-4.5027	-3.44348	-7.03706	-3.95236	-3.93594	-5.13962	-5.32715	-4.95772	-3.60172	-4.77937	-4.1436	-2.42138	-4.85379	-3.36935	-4.52599	-3.70786	-2.18616	-1.6002	-3.38614	-5.3478	-4.48425	-3.98251	-4.24566	-4.69858	-5.13667	-4.59033	-5.09597	-6.17778	-7.08122	-5.72713	-5.10665	-4.20848	-3.42911	-4.21784	-2.89329	-4.83619
					-1.5397	-1.96006	-1.87196	-1.33371	-0.0849133	0.562159	-0.424893	1.33908	-2.33286	-1.16992	-1.58563	1.90057	2.4965	0.649079	1.9775	1.44299	1.46578	0.469146	0.615532	-0.0766691	0.111503	-0.395047	-0.479282	-1.19812	-2.35586	-1.16831	-3.53499	-2.49303	-3.13674	-0.751653	-1.14657	0.215714	-1.21428	-0.920862	-1.11983	0.618461	0.316151	0.0490522	0.167635	1.70836	-1.18711	2.39637	0.965645	-0.813079	-0.129758
					0.433677	1.48303	0.669202	2.005	1.14758	0.620253	1.77111	2.66766	2.74447	1.15335	-0.870831	-2.1569	-1.06769	-1.87318	-2.53058	-0.00190915	0.264099	2.14874	2.91306	3.43822	1.60847	0.404262	-1.05434	-0.594645	0.33246	-0.653185	-0.935222	-1.17786	1.05221	1.43682	0.571213	2.84879	-1.01836	-3.32249	-3.0076	-4.14017	-5.47277	-4.4254	-4.99744	-5.7766	-3.58753	-2.47565	-4.28593	-4.54443	-3.21567
					3.9075	1.73841	-1.64148	-1.00536	2.51665	-0.602844	-0.820861	-2.66683	1.62688	0.943843	1.43967	0.626689	0.346602	-0.975639	0.826078	-1.01808	1.41362	-0.196276	1.37714	1.23675	0.980605	-1.51689	-0.509514	-1.36765	-1.71428	-6.01964	-4.7591	-6.79777	-6.6465	-6.32658	-6.96208	-8.6689	-6.84084	-5.79246	-7.83042	-11.2712	-9.56857	-9.79996	-8.64165	-7.81198	-9.90967	-6.43489	-7.22625	-6.10387	-5.04736
				120s ITI group	1.27097	0.55675	1.94867	1.56354	1.98085	1.22178	1.09836	0.773	0.817568	2.24081	1.2209	2.27769	1.63367	2.08457	1.59047	0.882086	-0.575608	0.130025	-0.551364	-1.82061	-0.209434	-1.3975	-0.523933	-2.36315	-0.868889	-2.92675	-2.89224	-3.72392	-3.41938	-5.40379	-3.74988	-4.04982	-4.20331	-4.10076	-4.41006	-4.4838	-5.86234	-5.30405	-4.56565	-6.16999	-5.05525	-4.9773	-5.43439	-6.71177	-7.43021
					0.934191	1.33154	-0.0453837	0.699083	1.03815	0.224331	1.38653	-0.775207	1.29765	0.290296	0.226351	-0.484133	-1.42451	-1.73766	-3.20439	-4.2618	-3.94795	-4.82036	-4.8282	-4.75772	-4.69715	-4.40564	-3.93642	-1.93314	-1.25185	-1.68197	-0.102265	0.787222	1.87061	1.5174	2.51068	2.72146	3.83531	4.1645	4.61768	5.14793	3.7511	3.82329	3.18928	4.90318	3.34965	4.97702	3.39836	4.28233	3.74728
					-0.586302	-1.39696	-1.88193	-2.49946	-2.14493	-0.56005	-0.623341	-0.792778	-1.3022	0.296961	-0.153308	-1.9158	-0.651027	0.914562	1.36376	0.998739	1.2954	0.721903	1.0988	0.761189	-1.40232	-0.0550274	-0.306181	-3.33893	-1.61034	-0.959622	-0.61846	0.243394	-1.2395	-0.238218	-0.191878	1.16452	1.46441	0.330572	-0.856207	-1.19261	-0.605101	-1.38443	-0.31454	0.0302578	-2.49951	-0.781191	-2.38874	-2.21473	-2.59932
					1.32385	1.234	4.43457	3.00223	3.22621	4.82985	4.31574	2.24914	3.70753	5.40345	4.21009	3.66094	2.44284	1.14714	1.09801	-1.95939	0.387863	3.25826	1.30836	1.61936	0.220579	1.99684	0.715513	-1.2146	-4.06611	-3.87032	-3.36729	-4.19669	-5.71723	-5.62791	-7.11179	-6.87596	-5.7045	-7.5557	-7.28336	-7.62049	-6.93839	-8.67482	-8.89998	-8.48518	-7.27794	-7.32155	-6.56093	-7.31922	-6.41504
					0.140288	0.0927898	-0.264233	-1.41633	-1.17962	-2.55205	-0.0118961	-1.31893	0.385736	-0.657685	-0.804611	-0.80975	-0.076054	-1.1673	-2.21247	-2.67218	-1.91518	-1.60897	-0.76091	-2.48489	-0.298207	0.867055	0.891961	1.09931	1.93921	0.940796	0.353064	-0.163291	0.721508	-3.25999	-2.65596	-2.22198	-2.50385	-3.61263	-3.04818	-3.90678	-4.60639	-4.36492	-3.44412	-5.25163	-5.33815	-4.79308	-6.63453	-5.31305	-4.91509
					0.0113786	0.364185	-0.137565	0.939106	1.58467	1.69175	-0.156683	1.91669	0.747507	1.59126	1.71988	2.28039	2.26521	2.66219	1.97788	0.0324286	0.125113	1.19944	1.44959	0.283009	-0.931653	-0.372168	-1.05186	-1.84538	-2.62071	-1.72431	-3.47255	-3.55888	-5.07236	-4.06166	-2.26357	-3.92182	-3.64121	-2.80446	-1.75906	-0.297893	-1.71876	-1.79041	-2.01088	-2.88356	-2.30218	-1.14576	-2.08461	-0.417637	0.271473
					0.0648671	-0.311494	0.300672	1.27547	0.22407	0.182524	0.77064	0.739885	2.34988	-0.137378	-0.397125	-0.456857	0.0129038	-0.104466	-0.679916	-0.78463	0.296983	-0.75681	-0.912538	-0.806733	-1.97645	-1.41295	-0.517214	-0.0737863	-0.179736	-0.173857	-0.970259	-1.65155	-1.72449	-2.2226	-3.60415	-2.63136	-3.29569	-2.47051	-2.80706	-1.32035	-3.55036	-3.23568	-2.38624	-2.10756	-3.81671	-4.80314	-3.54587	-4.40105	-4.62568
					2.07537	1.50132	1.92708	2.23253	2.05721	1.41082	0.310505	0.589071	1.20628	1.02624	1.39043	0.553669	1.20637	1.32491	1.11666	0.715864	1.01955	1.15743	2.57123	1.29838	1.23655	0.490869	0.16802	-0.387876	-0.994704	-0.686526	-0.63048	-1.09301	-1.33474	-3.19108	-2.8446	-3.88751	-3.83059	-4.62629	-3.44322	-3.1696	-4.72992	-5.08705	-2.82828	-1.25158	-2.82987	-4.81768	-4.58346	-5.5259	-4.96904
					-1.29756	0.0167358	-1.69425	-2.04282	-0.384827	-0.210446	-0.423867	0.0751036	-0.241894	-0.831595	1.16906	0.152745	0.22035	1.26779	0.28087	0.192982	1.19041	1.94223	0.70415	0.800946	0.306751	-0.52168	-0.139208	-0.272218	-0.0233292	-0.061217	0.0743163	-0.477145	-1.36138	-1.42592	-2.32034	-1.75962	-1.55728	-2.34892	-1.68842	-2.59131	-2.7403	-1.848	-0.275756	-2.98286	-2.56014	-1.57705	-1.79679	-2.06722	-2.12448
					0.224033	-1.31353	-0.950421	-0.394344	-0.963673	-1.78326	-0.837884	-1.15487	-1.44564	-0.838673	-1.39471	-0.930728	-0.786518	-0.660887	1.28864	-1.05752	0.795382	0.44241	-0.633633	0.916951	0.645685	2.06697	1.47309	2.36699	2.19214	2.28467	1.91059	2.74815	3.09722	1.92067	3.54507	2.81096	4.11439	3.74848	4.30731	3.82335	3.06998	2.90367	2.40035	2.47623	2.64026	0.755048	1.18563	1.70874	2.20477
					3.27754	1.43736	3.4524	2.03113	2.7892	2.27734	2.00285	2.47245	2.16079	1.83084	2.14489	1.6724	1.05857	1.18474	1.48418	-0.208702	-0.625744	-2.43565	-3.55154	-3.86037	-3.78979	-5.08675	-3.34222	-4.54796	-3.31542	-3.22876	-2.447	-2.93177	-0.516451	-1.41953	-0.0610311	-1.70908	-1.24046	-0.813897	-1.223	0.710422	1.93088	-1.18651	-0.15491	0.350979	1.29269	0.446103	1.04372	-0.309487	0.449856
					-2.06454	-0.723946	-0.164695	-0.897768	-1.25295	-0.479496	-2.22411	-2.29144	-1.47555	-2.10555	-2.20454	-1.92085	-1.17849	-0.886463	-0.464459	-0.823253	-1.14964	-0.498862	-1.03733	-1.47616	0.579531	0.193847	0.353658	0.419684	0.0258104	0.741118	0.450546	-0.397849	0.850205	0.566626	0.056236	-1.35811	-1.76228	-0.329401	-2.31396	-1.42155	-1.57152	-1.26272	-2.73958	-4.06952	-2.86009	-3.60753	-3.72703	-4.62394	-2.99289
					2.6833	2.58558	3.49024	3.88242	3.47366	3.28423	1.79428	4.1701	2.78485	2.64725	1.44941	1.0775	0.928105	-0.513813	0.196354	0.454369	-1.14411	-2.00698	-3.10788	-1.52197	-3.80195	-3.03018	-3.55027	-4.32748	-3.5291	-3.25852	-4.69233	-4.72937	-4.28206	-3.63006	-5.40156	-5.73102	-4.9706	-5.78109	-5.47557	-4.85469	-3.44016	-4.05969	-3.22756	-4.17217	-4.59198	-4.07166	-3.55907	-4.18478	-6.10144
					0.549693	1.2815	0.444314	1.6274	-0.154863	1.20166	0.436276	1.6479	0.516081	0.258145	0.434518	0.968486	0.827937	1.8883	1.69211	0.850666	0.194013	0.457339	-0.535339	0.589488	-0.0332304	-1.84911	-1.04854	-1.22442	-0.988839	-1.52858	-1.70895	-0.886843	-0.476366	-2.41538	-0.632809	-0.623391	-0.66648	-1.15943	-1.15071	-0.268894	-0.218675	-0.839739	0.675749	-0.957976	-2.13902	-2.2204	-1.97078	-2.52166	-2.34011
					1.50046	2.29767	3.73929	1.73286	2.71204	1.54725	1.25716	1.43087	1.46946	1.21793	0.406267	-1.11267	-0.371486	-2.73131	-2.70131	-3.00117	-3.68366	-3.88641	-2.90572	-3.46917	-4.46904	-3.30033	-2.65842	-3.383	-3.2087	-1.91336	-2.57875	-1.45432	-0.876844	-0.082699	0.341442	0.187707	0.311537	0.657124	0.681145	1.07769	0.539811	0.844188	-0.359172	0.134853	-0.463577	0.627916	-0.26903	-1.36797	0.426627
					0.855192	-0.920736	1.2623	1.98952	1.24754	0.680235	-1.62138	-0.229383	1.22802	0.650653	1.45836	-0.716706	0.129666	-2.526	-0.835736	0.587338	-3.88479	-2.34417	-2.53572	-0.0403017	-0.929717	-0.587507	0.203652	-0.748702	-0.0296973	-0.0428818	0.381492	0.846492	-0.69089	0.441297	2.49184	1.10807	-3.71788	-5.55713	0.00642829	-1.11197	-2.68949	-0.555775	-3.14098	0.750009	-1.58267	-2.09388	-2.46298	-0.909926	3.26757
					1.19032	4.24136	1.94606	1.55376	-0.570358	-0.0934927	0.956699	2.09674	1.49197	-1.00899	-0.47502	-0.114976	-1.78029	1.53094	1.47575	0.116333	-1.09911	-0.348178	-2.57832	-1.49069	-1.81653	-2.66937	-3.82537	-1.79208	-3.94182	-2.65225	-4.32749	-4.13426	-2.72628	-2.07433	-4.37382	-2.74514	-2.45679	-4.65249	-11.4321	-3.59582	-4.92441	-8.07707	-6.93168	-6.29316	-6.29828	-5.46486	-6.1031	-7.71236	-6.29669
					0.270964	1.84824	2.18179	-1.03641	0.507962	1.06579	-0.0259247	0.899871	0.822785	-0.525204	-0.614708	0.896694	-0.37577	1.68631	1.54421	0.588983	-1.07159	-0.391668	-0.193889	-0.258394	-0.956134	0.358955	0.731726	1.60842	2.62481	-0.273118	1.71423	1.37937	2.22941	1.6056	4.23857	1.0946	2.44372	0.763879	0.606261	0.179653	2.14368	1.24281	1.71047	-0.965631	-0.558401	-1.53525	-1.62441	-1.72026	-2.64414
					-0.546349	0.416555	0.0341641	0.842898	0.475435	0.139948	0.628314	-0.591343	-0.273483	1.99615	0.154849	0.0238187	1.31258	1.46502	1.72848	0.524682	-0.357745	-0.0419075	-0.105354	1.13372	-0.81337	-1.71819	-1.48175	-0.984989	-0.949648	0.42515	0.790969	1.78193	-0.140458	0.0713094	-1.65449	-2.34266	0.569103	0.0128858	-0.0719704	-0.0544132	-0.762827	-2.08146	-1.2718	-0.621213	-0.997947	-1.2396	-0.290725	-0.291373	-3.71837
					0.945422	4.27142	2.89718	3.33831	3.04734	2.03537	3.79465	3.56774	0.416158	1.79599	3.60779	-0.0987077	-3.18676	0.92786	-1.29684	-0.567401	-1.25386	-0.657226	-1.91876	-1.50385	-2.21747	-4.09267	-0.932926	-3.15821	-1.75939	-1.96311	-2.28028	-1.01475	-2.51888	-1.56556	-1.16741	-2.14596	-3.09219	-3.03589	-5.53931	-4.85372	-6.91047	-3.3545	-4.32708	-6.92095	-5.51353	-5.95914	-5.64466	-5.13973	-5.46416
					0.497173	-1.42491	-1.08672	-2.23373	0.627456	-0.956422	-3.54317	-4.41133	-2.42209	-1.29821	0.794552	2.47597	0.230797	-2.47257	-0.800602	0.253305	-0.82446	0.455396	-0.209978	1.0772	0.0239674	-0.8545	-1.29433	1.00241	-0.61354	0.977547	1.4088	1.41888	3.81335	-0.00491352	2.7014	-0.435978	1.10272	-0.978419	0.509223	2.09255	1.40372	0.0569156	0.020449	4.21061	0.647603	1.16815	0.741068	0.602768	1.3986
					0.195349	1.48202	-0.531417	1.44875	0.450985	1.99223	-1.33605	0.834968	-2.04931	-0.73736	-0.162105	-4.73201	-1.89686	-0.528876	0.386435	-0.730475	1.5644	0.916492	-1.50448	0.394291	-2.80964	-1.08021	-1.50915	-0.584782	-0.544237	0.0153459	-1.77075	-1.00797	-2.87128	-0.538834	-1.16626	-3.07423	-0.685316	-1.72768	-0.0871522	-1.09649	-0.777329	-1.47573	-2.25065	-1.14767	-1.78658	-3.68899	-3.09383	-4.65016	-4.02594
					2.90482	2.4209	1.75663	-0.0825196	-0.908601	-0.000892255	-2.72553	-3.5456	-2.84345	-4.77776	-4.12854	-3.02411	-1.04903	-2.88676	-4.27354	-2.54513	-1.62199	-2.091	-2.31715	-4.41927	-0.966403	-4.26502	-4.18231	-3.358	-7.27532	-4.34742	-0.382159	-4.73762	-2.50055	-1.04403	-0.10711	-1.01161	-3.38725	-0.156755	1.83737	0.288018	0.927697	-0.69126	-2.50705	-1.09707	4.66764	0.355998	1.51711	0.327877	-1.99075
					0.156205	-1.0045	1.96449	1.05036	-0.09508	-0.428372	-1.03766	-0.255315	-0.881925	-0.587578	0.0843338	-1.21294	0.223894	1.45	-1.66625	-2.71603	-0.296846	0.632676	-0.181074	-1.52371	-2.07962	-1.79183	-1.44946	0.370673	-2.24654	-2.22104	1.45582	-0.888058	-1.99294	-0.575862	1.10556	1.82626	-0.704565	-0.46009	3.3289	2.00318	0.752977	1.89137	1.64758	-1.80537	2.05869	-0.205649	-1.73122	-1.74584	-1.88759
					-1.03213	0.771493	-0.382057	0.673408	-0.231736	-1.49566	0.0633345	-0.626258	-3.03181	-1.21105	1.26523	0.305755	-1.08674	-0.879882	-1.11624	-1.85703	-2.04759	0.404222	-2.58726	-1.46406	0.850988	-3.11988	0.199193	0.406563	1.06029	3.03313	1.72504	0.777863	-1.42229	-0.941255	-0.246129	-0.955052	3.65827	1.53098	-1.50364	-2.36552	-3.14341	-3.3338	-5.18386	-0.904417	-2.35851	-1.17611	-4.00349	-3.85689	-3.80911
					-2.37523	-2.24081	-1.89352	-3.29605	-1.35117	-2.8682	-4.59365	-2.35928	-2.26869	-4.03723	-1.87448	-3.27454	0.352909	-1.61418	-0.556657	0.269722	-2.92258	-1.43902	1.00788	-1.55083	-2.3732	-0.776074	-2.99911	0.649011	-0.428229	-1.96911	-2.2143	0.949351	-4.07117	-0.723954	-2.50589	-3.15316	-1.49293	-1.49845	-2.17186	-4.68369	-2.12799	-2.95595	-1.7724	-4.31153	0.0723222	-1.65817	-2.6494	-3.57096	-1.15389
					0.625279	1.43374	0.424554	-0.289539	0.528572	0.265454	-0.418652	0.582406	0.822201	-0.887361	-0.669935	-2.25198	-0.190252	-0.870177	-1.88402	-1.35576	-1.92618	-1.66479	-1.30558	-1.22121	-0.861814	-0.429135	0.844646	0.301265	-0.468258	-0.397922	-0.806413	-0.32559	0.246074	0.117566	-0.943028	-1.04938	0.18864	-1.0605	-1.14192	-1.54427	0.744774	-2.46913	-2.25236	-1.4923	-1.35449	-2.02572	-3.0465	-3.09045	-2.58288
					3.19068	1.76169	2.04867	2.71205	2.83606	0.572447	1.51316	-0.282306	0.175772	-0.359489	2.7779	1.02801	0.783116	0.715277	1.25821	-1.73914	-1.80149	-0.215542	-0.882862	-0.533161	0.241584	-0.650486	-0.607568	-1.65132	-1.21645	-2.21493	-2.06446	-1.30489	-0.488886	-3.22651	-2.88082	-3.84767	-2.76284	-3.92637	-2.51559	-2.35225	-2.08918	-3.15158	-2.47178	-2.73634	-1.61907	-3.34602	-3.073	-3.94741	-3.97372
					3.37942	4.02278	2.66475	1.08284	0.146485	0.959886	0.346356	0.0349924	-0.304719	-1.81139	0.06554	-0.630555	-1.44038	-2.81467	-0.411186	-0.774205	-1.76589	-2.70863	-1.28075	-3.94973	-4.06226	-2.20099	-3.89912	-3.13215	-4.06488	-3.53251	-5.30582	-6.21024	-4.64286	-5.62677	-2.45293	-2.54278	-4.68329	-2.85251	-3.39445	-2.89902	-3.86385	-4.07035	-2.50116	-4.09912	-4.62793	-4.47629	-3.47692	-4.28581	-3.52205
					-0.717173	-0.56988	0.759118	1.19678	0.813727	-2.30866	-1.83201	-1.18792	-0.32607	-1.95835	-2.54391	-1.55277	-2.00817	-3.11947	-1.45901	-1.70387	-1.13578	-1.56182	-2.66165	-3.14343	-1.17922	-2.06154	-2.52746	-1.09517	-1.99484	-1.11816	-2.06542	-1.85752	-0.481595	0.338354	-0.209815	-0.981707	-3.24153	-0.71989	-1.48774	-0.942731	-1.50491	-2.47621	-3.92485	-2.31795	-2.7668	-2.67398	-2.25157	-2.77547	-1.84953
					1.01093	-1.48031	-0.165308	-2.23559	-1.59127	-1.80044	-2.05955	0.424771	-1.30105	-0.565206	-1.28081	-3.19341	-0.243403	-1.78684	0.283156	-1.14854	0.578746	-1.09413	-0.695702	-0.398514	-0.345358	-2.15602	0.742994	0.447267	-1.3595	0.861592	0.0606117	-1.56012	-1.42113	-1.42737	-1.3476	-2.14511	-0.54617	0.871425	-1.00278	-1.81257	-2.03792	-1.65276	-0.940107	0.479344	-3.03851	-2.31291	-2.2908	-1.21249	-2.28012
					0.50918	2.54818	2.13119	2.12848	1.05125	2.16362	1.84457	1.06882	1.1658	-0.0464612	1.80249	0.98233	-0.494838	-2.21265	-0.107262	-0.0668843	-0.47342	1.23724	-1.92111	-1.12329	-0.969167	-1.98613	-4.62283	-1.54661	-1.1613	-0.958654	-2.09485	-0.844909	-2.14519	-1.49721	-0.374598	-2.07305	-1.76115	-2.23774	-1.56636	-2.16553	-1.18025	-2.70101	-2.80128	-1.61941	-2.65481	-2.52313	-1.65464	-2.69166	-2.405
					0.605644	-0.0365402	2.22797	1.32067	0.834009	3.49232	0.154155	-1.24927	-0.828971	-2.40307	-0.498318	-0.703945	-2.2951	-3.77305	-1.72746	-1.37774	-2.53207	-2.00593	-3.57203	-3.10954	-4.92683	-0.54919	-4.63883	-3.69627	-3.36738	-2.14526	-2.41989	-1.18795	-2.70273	-1.32847	-1.0753	-2.21021	-3.20645	-1.2036	-0.339804	-2.4514	-3.2599	-4.01914	-3.99843	-2.45063	-3.04721	-5.84939	-4.61887	-4.56529	-4.06586
					1.63658	0.397384	2.18808	1.93564	2.24424	0.14179	-0.0242876	-2.67057	0.639992	0.715564	0.14197	-0.567921	2.25027	-0.0616034	-2.8387	-1.62716	-1.47231	-1.76287	-5.49321	1.04927	-3.54657	-5.02293	-1.76172	-4.46076	-3.96371	-3.43893	-3.05698	-4.61129	-4.40946	-4.52413	-5.24899	-1.69735	-4.74039	-4.62195	-4.64002	-4.27336	-4.32458	-4.04395	-1.71731	-4.26517	-3.10026	-2.64355	-2.85312	-3.24429	-2.90806
					-0.138428	1.40627	0.393166	0.332468	0.751326	2.69978	0.485679	1.97137	2.18708	0.997355	2.2096	-0.133412	1.10526	-0.622524	1.22627	-1.34003	-1.69232	-0.597441	-0.217652	-2.55476	-2.15984	-2.56517	-1.94839	-0.1956	-1.88656	-2.06064	-4.14134	-2.8741	-3.89191	-5.95695	-2.7435	-2.50939	-4.72204	-4.28771	-5.99792	-4.156	-3.51351	-4.31495	-5.40345	-3.93453	-3.08877	-4.52015	-1.96556	-3.22009	-2.99756
					-2.08341	-2.43407	-2.8779	-0.0919391	-0.239737	0.00380127	-0.152146	0.16038	3.26303	-0.509672	-0.568835	-0.078185	0.329429	0.879351	0.400366	-2.2212	1.04613	2.43741	-0.906516	2.55341	-1.56819	-2.01148	0.167246	0.55571	0.2281	-0.755498	2.29499	-0.841111	1.51873	-1.51996	0.511044	-0.455865	-1.44531	-0.437311	-2.15909	-3.18377	-1.97937	-2.11076	-2.28107	-4.41393	-5.89832	-3.25559	-3.02493	-0.154588	-1.46366
					1.39564	-0.917208	-1.60629	-1.81866	-1.47341	-0.872122	-0.346958	-1.01731	-0.269542	-0.572323	0.973902	1.11079	1.13024	3.32083	3.61257	2.92268	2.71453	2.41282	1.41078	1.50257	0.155039	-0.0730046	0.894881	1.03848	1.53735	0.928514	-1.89998	1.2416	-0.669835	-4.45282	-6.0143	-1.44338	0.908936	-1.46868	-1.4214	-2.13589	-3.42847	-5.72092	-5.59726	-2.26469	-7.35392	-5.83941	-3.52545	-3.68692	-6.58601
					-0.0613294	-0.593946	0.878771	-0.564816	0.23063	0.871151	1.62545	0.217181	-0.475833	-0.729322	0.926947	-1.11066	0.987761	-1.59598	-1.48309	0.497901	0.503593	2.73375	0.817034	0.949683	0.263875	0.442096	3.55479	0.415968	0.0443042	0.136499	-0.324226	-0.269019	-2.1407	-1.052	-0.762293	-0.287584	0.281517	-1.209	-2.84771	-2.00412	1.05813	2.06799	2.24979	-1.4313	-0.326808	-0.495156	-1.88598	0.884786	-1.55893
					-2.14443	0.300752	-1.5853	-1.58864	0.799704	-1.79217	-0.507175	1.12527	1.30768	-0.447322	1.22709	2.01183	-1.89388	2.18216	4.19225	4.41334	4.49277	1.63852	2.51081	3.24977	1.90391	1.50665	0.683915	0.0917612	1.71941	-1.21048	-1.77413	-1.40141	-1.1137	1.05309	2.66062	7.17367	10.7573	8.37789	10.0297	9.0001	9.41267	11.7553	7.56386	9.4631	9.54858	9.1715	7.28063	14.0244	9.65587
					-1.31478	2.96054	-3.38221	3.4943	1.10553	-0.0630658	3.3944	2.23551	0.455453	1.00656	3.14966	-0.460466	0.261649	1.51763	0.535222	1.68737	1.81022	-0.505663	2.99313	-1.36613	2.43946	-1.50415	-3.40362	-1.40964	-2.95474	-3.92504	-2.28883	-3.10154	-4.184	-4.08512	-5.85235	-4.81827	-7.06371	-5.80207	-6.55172	-6.11787	-6.92108	-6.81697	-7.56414	-4.01486	-8.7933	-7.3538	-11.4622	-9.66293	-7.17735
					-3.2433	0.133885	-0.383681	1.07152	3.01886	0.304588	-2.21839	-2.51301	2.2826	0.681366	2.10694	2.82814	3.62628	3.3505	0.678609	1.0901	-0.852545	0.400635	-0.672205	3.13716	3.12357	-0.664347	-0.966946	-3.023	-2.10445	-1.94684	-0.584679	2.59217	3.03305	1.60708	0.846979	4.85126	4.42468	3.94941	3.67397	0.677221	3.40831	3.3336	2.3347	3.93528	4.33855	5.64243	0.0653396	3.05356	4.74596
					2.68959	3.39455	0.895889	0.702921	0.909673	-1.29846	0.120882	1.73342	1.87765	2.93348	2.11714	0.770895	0.731684	1.79041	-0.273036	-0.0646463	-1.3994	1.00148	0.865797	-1.98689	-0.665114	-1.81558	-1.58332	-0.403703	-2.85842	-1.22578	-3.28974	-0.913037	-2.5599	-1.68228	-2.54439	-2.09322	-1.85225	-1.7033	-3.49433	-0.473968	-4.55246	-1.03794	-2.80466	-6.62237	-4.59122	-5.46054	-4.84778	-7.34168	-6.06309
					0.500952	-0.914493	-0.979438	-1.53666	0.0475566	-1.30056	-1.61788	-1.18709	-1.40534	-0.321073	-1.9752	-0.0200008	-0.625219	1.36477	0.159271	1.54345	0.883398	1.34733	0.630361	0.633356	0.877452	-0.417302	0.136446	1.45545	-0.029264	-1.56855	1.56348	1.87263	1.3476	-0.981961	-1.78402	-4.9903	-1.49266	-1.20242	-1.40598	-2.00327	-2.65047	-3.45637	-1.20616	-0.368443	-1.77115	-1.53449	-1.09972	-0.45545	-2.15091
					-0.704251	-2.19404	-2.31981	0.202492	-1.61313	-0.418291	-0.438871	1.76467	0.507208	-1.18143	-0.238947	1.42394	-1.11914	0.964251	1.93269	-1.51459	0.830678	-1.1071	-0.436326	1.80339	-0.63398	0.58065	0.166481	-1.03681	-0.193509	-0.389601	-0.723993	1.80112	-0.640588	0.535203	0.486352	0.601177	1.06138	1.07349	-0.75055	-0.00772125	1.5113	0.448476	-1.52445	-0.372344	0.39332	0.968047	-3.26504	-0.114112	-1.10665
					-0.918247	-0.0112678	-0.78102	-1.15864	-0.487757	-0.668726	0.524585	-3.29296	-2.36083	-1.72044	-2.01514	-0.812624	-2.82126	-0.00439303	-1.70601	0.712212	-1.6547	-2.45808	-0.588908	1.77709	0.118535	0.13987	-1.03375	0.484852	0.505195	0.338723	1.04167	4.12581	5.20928	0.698452	3.40115	5.66364	1.85781	-3.28327	4.28121	5.6061	2.55751	2.2043	2.04974	3.01021	1.43118	1.37675	2.50727	2.63973	1.82591
					1.83513	4.73574	1.89505	1.20326	0.160219	0.309383	-1.72788	-2.70822	-2.33334	0.0806847	-3.80363	-2.77892	-5.23958	-5.62595	-2.38457	-2.84492	-2.71971	-1.55217	-4.4414	-2.40032	-1.91594	-0.608946	-1.58256	-0.519586	-1.29184	-2.30375	-1.89368	-0.41831	-2.0345	0.186349	-0.715488	1.3817	0.184422	-2.32868	1.02466	-0.837305	-0.372772	0.20612	1.15532	1.10707	2.77264	2.19536	3.15896	1.98306	1.37631
					-0.908456	0.79734	2.45478	3.18145	3.50789	1.84716	1.77192	1.85771	1.01055	1.83636	1.92357	2.07761	-0.663597	-0.383624	-3.09136	1.11665	-1.05863	-0.882912	-0.710283	-2.61704	-5.26409	-6.08178	-4.52162	-6.77595	-4.9713	-3.53227	-5.65721	-2.26597	-6.23933	-4.06892	-4.3552	-4.04519	-5.46455	-3.73846	-6.19922	-6.45598	-4.94858	-7.00836	-6.71702	-8.7307	-7.15108	-5.32592	-5.35926	-6.1943	-5.5254
					0.110253	-0.944702	1.276	-1.8197	-2.46106	0.507085	-0.256238	-0.552104	-0.128208	-3.65865	-0.493471	-0.269352	-4.06242	-2.08324	-1.31601	-1.32444	0.0798251	-1.44195	-1.45844	-1.3671	-1.18038	-0.832648	-1.90278	-1.08969	-1.49352	-2.14803	-1.98701	-1.94231	-3.26651	-5.19334	-5.98979	-5.02667	-4.61782	-4.79608	-4.46035	-5.03336	-6.10498	-5.47687	-7.76167	-6.15066	-5.64845	-6.70331	-9.37621	-7.96895	-7.23619
					-0.247431	1.43044	0.0879072	-0.318687	-1.30689	-2.34574	-1.89614	-2.03921	-3.31598	-3.38955	-2.12041	-1.36486	-2.75744	-1.72181	-1.27102	-0.607096	-0.867293	-2.30125	-3.9584	-6.64178	-5.85261	-4.25334	-1.48596	-2.59498	-2.13545	-2.42161	-0.960688	1.04045	1.50069	0.152191	0.987601	0.322396	0.237284	0.441821	1.72706	1.6154	1.7785	0.608658	-1.88905	-1.51597	-1.73428	-0.107649	-1.66023	-4.46574	-3.76077
					0.0105237	-0.700642	0.531997	0.64203	-0.423534	-0.313566	-0.628482	-0.636852	1.32846	0.197885	1.06459	0.573689	-0.445591	0.458239	1.18695	0.888087	-0.481074	-0.852883	-0.0373739	-0.72637	0.0315445	-1.6143	-1.3956	-1.33435	-1.81649	-0.200386	1.54765	2.40469	-1.74392	-0.291531	-0.387095	0.0695601	0.160004	3.19834	1.45066	0.520353	1.64012	1.9226	0.379129	0.961154	0.946561	2.04761	0.786292	2.81322	3.26809
					2.67934	0.447535	1.42387	0.475254	0.284684	-0.581995	-0.265204	-2.00326	-0.881173	-0.405495	-0.729062	-2.81104	-1.33557	-1.27368	-1.25763	-1.15687	-1.50849	-0.183424	-2.02357	-1.23226	-2.89016	-2.31663	-3.41587	-2.10548	-2.10524	0.559763	-1.83141	-1.84865	-2.0154	-1.35709	-1.21957	-1.43956	-1.34384	-4.75146	-3.96955	-2.64436	-2.90701	-3.80915	-2.71035	-1.78171	-0.987413	-1.45273	-1.45456	-2.89115	-4.08039
					-0.837104	-3.65484	-2.36166	-0.594889	-1.11487	-1.39082	3.23165	3.25752	-0.0971988	0.947119	0.654395	1.37301	1.85051	5.08003	2.65414	1.61628	1.56584	4.33209	5.24664	4.1595	6.52996	4.35738	5.27268	5.55462	5.74294	5.13606	3.3053	5.56372	4.35417	0.993261	3.31212	2.38951	2.3733	4.79099	3.64233	4.00957	1.47827	1.89057	3.25977	6.04558	2.96245	1.38604	-0.194411	2.52936	1.87744
					1.01225	2.19472	-0.0314058	-1.1838	1.00657	0.213262	1.47916	-0.346799	0.475479	-2.69786	0.0020043	0.0508953	-0.557362	-1.51729	0.548703	-0.384237	0.450655	-3.42661	-1.88042	-0.156118	0.379276	-2.35318	-2.77776	-2.24266	-2.94115	-2.53407	-3.54233	-1.83873	-6.19321	-3.02816	-1.5585	-3.37383	-2.81133	-3.37178	-2.45557	-1.97462	-4.61046	-2.33162	-2.53801	-1.79496	-3.82378	-1.75268	-2.75598	-4.01603	-3.10461
					2.15488	1.60683	0.44274	1.69394	2.18418	-0.250198	-0.9414	-1.9541	-1.02543	0.182947	1.25781	0.670583	0.119484	-1.16797	0.692903	0.73214	1.87493	-1.53295	-1.03433	1.49864	-0.947837	-3.93794	-5.03055	-2.11191	-2.91964	-2.43834	-2.80913	-1.47975	-2.04504	-3.49238	2.06767	-5.71577	-1.02022	0.0471552	-3.52014	-2.74548	-2.97605	-0.982371	-5.62501	-1.26822	2.90784	0.036368	0.725747	-1.62716	-0.953966
					2.29847	1.79901	0.0636739	4.43818	0.286815	3.36615	2.85859	1.50216	0.0378037	-2.18584	1.40771	-3.48533	-2.68296	-1.13547	-1.19117	-1.3591	-1.38109	-3.55296	-1.97996	-2.68502	-2.39523	-1.58518	-2.39408	-3.04462	-5.10687	-5.21105	-9.85621	-9.16799	-8.2882	-5.32194	-7.70187	-3.81925	-6.76728	-5.02709	-3.92591	-0.883286	-2.45418	-6.28038	-5.92871	-8.11313	-9.12279	-8.16858	-8.33908	-8.70385	-8.45226
					4.18887	2.70904	3.24513	3.60592	3.14523	3.54662	2.55473	4.28063	1.54266	0.323872	-1.99837	-0.0458736	-2.3472	-1.34207	-2.30814	-0.105176	-3.65853	-5.31816	-4.02981	-3.62549	-2.94738	-3.04703	-4.11644	-4.29569	-5.27451	-7.15258	-5.5149	-4.93165	-5.5869	-3.86152	-4.14424	-2.61333	-1.32631	-2.6904	-4.16013	-1.68729	-4.73456	-1.55871	-2.20388	-4.04517	-6.99005	-6.72731	-6.04243	-5.53176	-8.10745
					-1.30789	-1.7301	-0.842876	-1.15533	-1.14334	-0.598119	-2.14493	-1.82181	-2.9062	-1.19887	-1.93524	-0.870221	0.37478	0.641221	-1.13668	1.03755	0.947535	0.97164	1.09316	-0.289483	1.34527	0.500176	0.585342	1.64461	1.03032	0.928922	-0.530979	0.0246442	1.29393	1.19563	0.606148	-0.264736	-0.278838	0.61024	1.47911	1.03282	1.6639	1.49634	2.64378	2.2328	1.07392	1.336	2.58429	0.829073	1.93142
					1.58982	2.2444	1.5132	1.50675	0.13012	1.99954	0.738854	1.35973	1.83946	1.98961	2.63553	0.809246	1.61428	-0.0725169	-0.513985	-0.900304	0.96698	0.169995	-0.721361	-0.302013	-1.8559	-2.85172	-2.26756	-2.6045	-2.88921	-3.11635	-4.40643	-3.83628	-3.61973	-3.92577	-2.84545	-4.17451	-3.02775	-2.87821	-3.35429	-2.649	-3.60184	-2.44664	-1.39831	-2.86617	-1.828	-3.25111	-2.15168	-3.11244	-2.06493
					0.638758	-0.551837	-1.44287	-1.29316	0.648957	0.0229845	-1.52607	1.11181	0.618019	0.310388	0.546597	-0.272521	-1.10512	0.417744	0.333573	-1.69066	-1.28556	0.0963211	-0.762831	-1.94128	-0.921946	-0.160144	-1.96766	0.262474	0.306264	-1.0458	-0.636116	-1.24265	-0.277498	0.427871	0.0682575	0.37048	-0.489893	0.200722	0.0365424	-1.161	-1.7187	-1.83841	-2.34925	-2.49488	-0.102339	-1.06192	-1.45471	-0.959064	-1.00506
					-1.28166	-0.352801	-1.52929	-2.81875	-2.04232	-1.72409	-0.961637	-0.735618	-1.98572	-1.00548	-1.52685	-1.82731	1.50329	1.54801	0.446029	2.40263	2.37775	1.95458	2.16234	3.3751	2.73844	2.7771	2.36025	2.60863	0.729841	1.6493	1.0243	0.759736	0.126832	1.22275	-0.721191	-2.0275	-1.09358	0.967269	-1.24466	-0.150386	-1.38448	0.0297378	1.14572	-0.052029	0.99692	0.0156585	1.11837	0.254998	0.878118
					0.117962	-0.474482	-0.507582	0.335295	1.18727	0.292691	0.0771154	-1.10551	0.709095	0.136225	-1.18072	0.121629	-0.768735	-1.65193	-0.161243	-0.111275	0.862168	-0.83376	-1.31496	-1.07258	-1.16551	-0.953238	-1.03955	0.361818	-1.97473	-1.42249	-1.00707	-0.631207	0.540664	1.42838	1.05185	0.94359	0.995168	0.745099	1.23241	-0.21694	-0.331602	0.0978531	-1.1989	-0.382324	0.57097	-0.410433	-0.178086	0.877501	-0.718774
					0.309701	-0.23927	-0.299849	-0.328424	0.698637	-0.15569	-0.281998	-0.373244	-1.15441	0.685541	-0.0880693	-0.753405	-1.01599	-0.794919	-1.70009	-0.275673	-0.23976	-1.18708	-0.747947	0.290321	-0.306612	-0.333927	0.152777	2.17933	0.443337	1.16141	2.15177	1.31429	1.75623	-0.13513	0.372685	-0.422572	0.0262665	0.132517	-2.26762	-1.04769	-1.63849	-1.8483	-2.43475	-4.43552	-3.81185	-4.72542	-5.37461	-5.92062	-4.58673
					1.06648	2.22603	2.30283	0.651252	1.64862	3.7673	0.994362	1.40288	0.626825	-0.110795	-0.0976684	0.998485	-0.493109	0.482064	-1.38319	-0.0689703	-2.52449	-1.60915	-2.44631	-1.30772	-1.88703	-1.52969	-3.33519	-1.94365	-3.0654	-2.23469	-2.29902	-2.86647	-4.04614	-3.49303	-3.29268	-3.9066	-2.84679	-2.01196	-2.73285	-2.43506	-2.5172	-2.56094	-3.37057	-2.90325	-2.67759	-2.57926	-3.96109	-0.951481	-3.27574
					2.33718	1.34202	2.01462	2.66441	1.87871	2.09904	1.49821	1.33547	3.53115	1.64062	0.51491	1.48485	0.236854	1.2616	-0.0228401	-0.756568	-0.941441	-0.391449	-2.22875	-3.13945	-2.23143	-3.56043	-1.80996	-3.69414	-3.45601	-3.26164	-2.63624	-4.14115	-4.60069	-3.13495	-2.47616	-3.51004	-3.40137	-3.08479	-2.95681	-3.93066	-2.57769	-3.64137	-3.02465	-1.42446	-2.44794	-2.73101	-2.79476	-2.48987	-3.24214
					0.660637	-0.467973	-0.364419	-0.372742	0.0992746	2.00803	0.735536	-0.779398	0.87809	0.374179	0.480176	1.60373	1.69466	0.998436	1.03449	1.14261	0.814957	0.938229	1.71933	-0.495507	0.493644	0.294276	-0.26409	-0.177915	0.413263	0.265791	-0.96825	-2.57125	-1.72601	-2.3216	-2.4527	-1.48258	-3.12975	-2.68681	-3.75984	-3.26359	-5.20685	-3.83017	-3.87375	-3.38157	-4.10834	-3.88282	-2.9857	-2.87539	-2.4803
					0.668653	1.5593	0.876307	2.17578	1.5629	1.3024	0.912444	0.793069	-0.148744	0.34444	-0.742506	1.21169	0.32624	-0.325811	-0.085422	-0.747299	-0.540471	0.425995	0.383022	-0.697753	0.31176	-0.0542543	-1.12631	-0.523813	0.850688	-0.335592	-0.228943	0.731305	1.24262	0.549305	1.22084	0.268673	0.263624	1.46307	0.278696	0.695201	1.42808	-0.00446161	0.800948	1.29826	0.130384	0.503624	0.00132349	0.367041	2.11065
					1.90918	1.17313	0.752047	0.958473	0.407396	0.152901	0.0411771	-0.147859	1.60686	-1.83498	-0.14021	-1.17739	-0.792764	-1.63274	-0.986005	-0.451037	-1.00117	-2.0264	0.0467047	-2.02456	-1.23904	-1.86488	-1.66127	-2.25139	-2.26189	-1.86718	-1.23314	-2.17131	-1.68176	-1.89939	-2.25666	-2.12718	-0.273341	-2.28713	-0.446003	-0.478917	-0.359928	-0.443591	-0.313079	-0.323523	-0.440156	-1.32885	-0.416856	-0.313998	-3.05288
					0.302296	0.367907	1.69149	4.26693	-0.599192	0.200507	1.57395	1.56128	4.22287	1.94273	0.95487	0.313204	1.38248	2.31175	2.04679	0.487376	-1.05971	-1.76785	-1.70079	-2.26931	-3.50571	-2.5266	-3.68605	-2.63419	-2.94455	-2.96482	-1.53451	-2.91426	-3.2828	-2.15448	-1.68095	-1.35522	-2.26686	-2.85353	-1.38434	-2.97076	0.026218	-1.2392	-1.9542	-2.29048	-1.30226	-4.7794	-2.50338	-1.91678	-3.33603
					-1.36328	-0.224073	0.853107	0.196191	0.656627	-0.997883	0.945971	-0.313605	0.4319	-0.0651406	-0.51795	1.35782	-0.681079	0.258215	-0.978424	0.497917	0.163638	-1.46734	0.427567	0.0458635	-0.31754	-0.12179	-0.99181	-0.121138	-0.0574578	-0.091495	0.00531823	-0.681781	0.261749	-1.39157	-0.877926	-0.561403	-0.77387	-1.85669	-1.38584	-1.27866	-1.99426	-2.10933	-1.55897	-2.87805	-3.2218	-3.87967	-3.83266	-5.17177	-5.35664
					2.06781	1.11011	1.57926	1.87292	1.52996	1.10177	0.162468	-1.54961	-0.583318	-0.608894	-1.13141	-0.668472	-1.43911	2.69814	2.23517	1.30986	2.05033	3.00025	1.53972	1.61727	2.22921	1.78233	0.663907	0.80406	4.47487	1.58488	1.72641	4.26061	2.81579	1.75973	1.93393	0.195978	3.35737	3.06992	1.57997	2.12291	2.50967	2.47574	4.27781	1.64454	5.02318	7.6503	7.25443	9.55873	9.86417
					0.777158	0.0841774	2.90307	0.897946	-0.913708	0.961674	-1.13007	0.295844	1.50248	-1.68544	2.31771	1.4895	3.34935	2.49618	1.42421	2.84972	1.51251	2.91752	1.97718	1.50657	-0.601749	2.46039	-0.665559	2.10398	1.67261	0.818341	-0.87168	3.29572	1.67599	-1.1323	0.396956	-0.346912	2.52701	1.14201	1.93463	1.81272	0.20933	1.05614	-1.24884	-2.1267	-1.81163	-0.147721	-2.01133	-1.59654	-2.75894
					0.589292	6.21979	3.09744	7.12324	6.07272	3.08368	4.65949	3.8798	2.83888	1.52639	2.03284	1.1941	1.68145	0.417996	1.4248	1.83953	2.58287	-0.729432	-0.854019	-3.4079	-0.866304	-3.71612	-5.93488	-3.73097	-3.39912	-2.56003	-4.96636	-4.70242	-7.4833	-4.81041	-5.83332	-6.21431	-3.79211	-2.81966	1.159	-0.277148	-0.719677	0.799572	-0.025535	-2.60096	-0.180056	-2.59165	0.80411	-4.03277	-2.83239
					-0.893573	0.579937	-2.27444	-0.840982	-1.11173	0.11864	-0.8279	-0.0653536	-1.42379	-0.285933	-2.91264	-2.93585	-1.87895	-0.920285	-2.10361	-0.668255	2.93003	0.675817	0.0627502	3.22064	-1.5011	0.0456016	-1.4903	0.0314889	-0.302032	2.39643	1.19623	1.91022	0.354326	3.05342	-2.07979	0.167376	0.448377	0.161178	0.317641	-1.79773	-0.536968	1.35207	-1.4102	-0.330381	-0.249422	1.63717	-2.03494	0.991079	0.365517
					-0.724789	-2.40252	-0.889991	-0.849818	-0.505239	-1.43519	-1.29871	-2.99698	-0.510395	-0.558274	-2.13884	-3.22228	-3.45379	-1.5232	-2.12397	-1.05383	-2.48075	-0.410172	-2.90102	-2.35811	-1.77227	-0.638941	-0.786181	-1.93239	0.391532	1.05767	0.68589	3.04796	1.04378	1.6195	3.26192	2.75048	2.74894	1.93663	2.63616	3.65489	0.505168	2.41606	4.21065	4.89123	4.48544	6.55441	4.59403	5.03839	4.73126
					0.272703	1.17731	0.656204	0.213401	-1.61967	-0.0233514	1.07528	1.3792	0.232578	-0.0740163	-0.625402	0.119379	-1.05356	-1.31193	0.091566	-0.768913	0.550927	-2.85304	1.39585	1.04141	0.439821	1.47107	0.604926	-1.52614	0.00882437	-2.77159	-1.42849	-2.01949	-2.8569	-4.42906	-3.7936	-5.50741	-4.44841	-4.319	-5.52811	-4.96629	-5.41588	-5.76018	-6.38102	-7.29078	-7.48377	-6.99897	-6.11418	-7.44153	-6.99923
					-1.58623	-1.2332	-0.0272416	-0.741515	2.12713	0.730828	1.27284	1.63403	0.850127	0.00275083	-0.0320749	-0.319183	-0.282468	-0.330915	-0.897951	0.765864	2.13104	1.6772	1.67338	1.06119	2.49296	0.80203	1.60671	1.31881	1.82646	2.16969	0.154997	-0.207694	2.77742	0.786653	1.66446	-0.0990627	1.57517	-0.528002	-0.594997	-1.55764	0.345787	-3.51047	-3.21167	-4.62981	-7.03171	-5.54904	-5.09865	-4.82034	-4.38302
					-3.24482	1.19628	-1.36025	-0.745185	-2.16578	1.57295	1.7324	-1.4672	0.353935	-0.916562	0.00772499	-0.229692	-0.588194	-2.59815	-2.20014	-0.246762	-2.5755	-1.33595	-1.63726	0.585806	0.463502	0.708643	1.71523	1.11444	0.559573	1.7869	1.04052	4.93963	2.37627	4.83063	2.35519	3.33605	1.17883	-0.0149727	1.98987	3.35354	1.38572	3.58191	-0.690701	2.1676	0.080501	1.49159	2.65075	3.09764	2.93913
					1.23084	0.693029	-0.25585	-1.01717	-1.95093	-1.77385	-1.61147	-2.18329	-1.43942	-0.801761	-1.49829	-1.58883	-0.147267	-1.89702	-0.00512355	-0.929571	-0.777225	-1.0692	-0.589927	1.87316	1.24309	1.95643	2.26693	1.29189	1.57313	2.34746	2.45485	1.62334	0.863918	1.75912	-0.00083475	0.447289	1.50225	0.731092	2.15966	0.22295	-0.203571	-0.572048	1.38929	0.552348	-2.46459	0.290668	2.3352	2.05711	3.15169
					-1.59782	-1.89076	-0.381083	0.298171	0.738972	0.66303	0.339499	-1.69415	-0.969106	0.947075	0.155573	2.38559	0.885778	0.0642817	-0.394678	0.22543	0.86387	-0.917349	-2.40688	-0.814946	-1.60474	0.232396	-2.38845	-0.341701	-1.38339	-2.55475	-4.10249	-2.68676	-1.73935	-1.20239	-0.701604	-2.38666	-2.39791	-2.4709	-2.60409	-4.26316	-3.06229	-2.47584	-2.43119	-3.32489	-3.61204	-3.60155	-5.46403	-3.19569	-4.11043
					-2.90675	-2.09099	-2.5165	-0.518214	-2.0626	-0.846495	0.250673	0.630074	0.414333	0.310084	2.51544	1.90067	3.69487	3.78563	1.91432	2.96873	1.79834	1.58256	2.46949	2.7828	1.71033	0.779778	0.817425	0.537237	0.834315	-1.53659	-0.245809	-0.913348	-0.700919	-0.222403	-1.35439	-0.824963	-1.99958	-1.30101	-0.541403	-1.74409	-2.30558	-3.99049	-2.30848	-1.83533	-1.38668	-1.30563	-1.73167	-2.72347	-1.81875
					1.5365	0.192733	-1.1667	-0.434236	1.49755	-1.07688	-0.489878	0.817911	0.0378146	1.35222	1.29891	1.75028	1.52624	-0.206511	-2.34279	-2.462	-1.39342	-1.40087	-2.65678	-3.50771	-4.71094	-2.72841	-2.44876	-1.35219	-2.32959	-2.20395	1.51336	1.34569	0.486947	-0.155152	-1.66613	-2.59166	-3.14641	-2.58279	-1.94324	-2.43505	-2.94815	-3.22961	-4.12414	-3.8346	-4.73445	-4.02903	-3.41285	-3.11623	-3.20769
					0.0569097	-1.38261	-1.13397	-0.897816	-0.57705	-0.959723	-1.58499	-1.77345	-1.09513	-1.53131	-1.85346	-1.87251	-1.84833	-1.40831	-1.77069	-1.52598	-3.42305	-1.83743	-1.79421	-1.94078	-1.1807	-1.55972	-2.29803	-2.129	0.685151	1.27085	0.959133	1.56075	1.60029	1.7627	1.5802	2.34099	2.95746	2.4853	3.38169	2.38521	1.38686	0.664472	0.118812	0.66625	1.18116	-1.28064	-0.701194	-1.68574	-3.56143
					1.11954	-0.155062	0.950028	1.44103	0.963173	1.26307	1.06915	2.96967	1.6335	0.945649	1.53854	0.410592	-1.17379	-1.15755	-0.311297	-0.750794	-1.40313	-1.51011	-1.35626	-2.52895	-2.7469	-2.43298	-3.2218	-1.81555	-2.15663	-2.65257	-1.9466	-2.79609	-3.10969	-2.8704	-3.83045	-3.74336	-3.47437	-4.36698	-4.42179	-4.86825	-5.62843	-6.45847	-5.95491	-6.63939	-7.04301	-7.09325	-5.71672	-5.6025	-5.5794
					-0.150591	-1.51865	-1.51104	-1.0867	-0.507751	-0.722754	-1.19508	-0.807631	-1.21027	-0.959789	-1.39062	-1.53832	-1.95281	-1.65472	-2.27384	-1.89937	-1.67558	-1.58883	-1.53448	-2.6031	-1.35914	-1.31423	-1.24934	-1.70204	-1.05711	-1.01927	0.493894	1.12875	0.640227	1.33665	0.988736	1.26844	2.34894	1.92585	1.74025	3.43634	2.21573	1.943	1.11239	1.99601	2.65733	3.22423	2.43871	0.937224	2.18222
					-0.11297	-0.451225	-0.415347	0.095925	-0.190285	0.391917	-0.188451	0.0756943	0.874404	1.05001	0.814458	0.782524	-0.187944	0.609918	0.211456	-0.159471	-0.419544	-0.407344	-0.121295	0.0626977	-0.946981	-0.0710516	0.060556	0.833837	0.251193	-0.330266	0.482277	1.36321	-0.516569	-1.6619	-2.00677	-1.88233	-2.55191	-2.9152	-2.7288	-3.38956	-2.46582	-4.04712	-4.14952	-5.7665	-5.67684	-6.34953	-4.65046	-4.65514	-3.55611
					-0.656327	2.16178	1.73059	0.790477	1.30244	0.582202	0.882395	0.887302	1.7155	1.45619	1.06596	0.127328	0.185029	-0.304455	-0.144455	0.00622998	0.139892	-0.216461	-0.29439	-1.44044	-1.29383	-1.7109	-2.41637	-3.37616	-2.50927	-3.56904	-2.18906	-2.33169	-2.39798	-1.88625	-2.97677	-3.75909	-2.99896	-3.56369	-3.5012	-2.43728	-2.88742	-2.8043	-3.84959	-4.32984	-3.24533	-3.78707	-4.66391	-3.78369	-4.07545
					0.238127	-1.03064	0.661213	-0.277683	0.248474	0.486029	0.407249	0.376747	1.30165	-1.15607	-0.0170771	-0.344503	-0.115363	-0.883149	-1.30072	-1.50767	-0.224586	-0.472555	-0.627149	0.0865512	0.426801	-0.0204246	0.543286	0.812909	0.680539	0.734154	0.464251	1.34735	2.10443	1.33028	1.36082	1.77314	1.73048	2.6674	3.19452	4.36475	4.84415	3.83326	4.48508	4.48866	3.05646	3.94752	4.78431	5.84434	7.09787
					-0.831914	-0.853254	0.176211	-0.555277	-0.748116	-1.29194	-1.54753	-1.62436	-1.30984	-1.01607	-1.33612	-2.3049	-1.05691	-1.50938	-0.976057	-1.25917	-1.70369	-2.11451	-1.39959	-0.761371	-0.807132	-0.303354	0.573836	0.178664	-0.176434	0.474231	0.485791	0.915513	1.98499	1.07441	0.222855	0.780362	2.40868	2.14541	0.83156	1.28945	0.672097	1.44861	1.2534	1.09002	-0.604031	0.328611	0.248591	-0.521576	-1.84915
					-2.43346	-1.74752	-1.97626	-2.72279	-2.75399	-2.4753	-2.15744	-2.84949	-2.54207	-2.1344	-1.57446	-0.766971	0.0167038	0.617595	1.07872	0.0790284	0.415828	0.172169	-0.263319	0.343902	0.194551	0.905371	1.36743	1.27692	0.465869	-0.845372	-0.233745	-2.58501	-3.18556	-3.24083	-3.13494	-4.00208	-3.26126	-5.01175	-4.49194	-4.6937	-4.77492	-4.91059	-5.84358	-4.85742	-4.69448	-3.23895	-4.48838	-4.71116	-2.53766
					1.01326	0.700928	-0.0841673	1.42499	0.526371	1.46225	0.304348	0.304132	-0.0422766	-0.217412	-0.776758	0.157506	-0.660014	-1.40562	-1.65826	-1.52282	-2.17086	-2.27079	-1.05062	-1.15397	-1.39346	-1.42028	-1.38929	-1.49341	-1.05821	-0.457576	-3.37076	-2.45924	-2.38745	-2.48024	-1.91492	-1.74714	-1.60004	-2.35774	-2.70392	-3.57929	-3.81761	-2.84645	-2.67139	-2.94476	-3.30897	-2.91619	-3.19271	-2.50905	-2.74829
					3.39303	1.49412	-0.620182	1.26833	1.87409	2.02148	1.47332	1.15634	1.72506	0.887747	-0.829973	0.108887	0.466889	0.692612	0.176068	0.0126692	-1.83526	-2.62849	-2.17818	-1.37552	-2.34232	-0.0856842	-2.2428	-0.476301	-4.08941	-2.69936	-3.36114	-4.71609	-3.32254	-3.54348	-3.49328	-6.8163	-4.98158	-6.92282	-4.14191	-3.42714	-5.06335	-4.92749	-7.39201	-6.32638	-5.08757	-4.9847	-7.99489	-8.24086	-8.55748
					0.399517	1.32177	1.07553	-0.23386	2.78685	0.531204	-1.05025	2.28396	-0.807145	0.726327	1.71655	0.406839	-0.78296	-1.51428	-0.480587	0.0170605	-0.555054	-1.06432	-1.37895	2.81527	-1.81506	-1.45127	0.208937	-2.14219	-0.429888	-1.26496	-1.79633	-2.76635	-2.83736	-3.82673	-2.95508	-5.60098	-5.92146	-3.39418	-3.64289	-6.90277	-6.60534	-5.84808	-6.77681	-6.46587	-7.18935	-9.12177	-7.69102	-5.30014	-8.79196
					-1.70313	-0.754049	0.916003	2.00237	0.662607	0.938656	3.58021	1.70923	0.621013	1.27474	1.08364	1.40498	1.48732	0.168909	-1.66893	-1.21926	-1.47284	0.794079	-2.40437	-2.32483	-1.47033	-3.39822	-4.05691	-3.42364	-4.34531	-4.18729	-4.44227	-4.43457	-2.60205	-5.40187	-3.8865	-2.02423	-2.16449	-4.38875	-4.55498	-4.15593	-5.2277	-4.17285	-3.71782	-3.32516	-4.70996	-4.79559	-5.29456	-5.47951	-4.86732
					0.517399	0.325318	-1.38218	-1.0213	0.592349	1.08758	2.83712	2.10574	0.942653	-0.250011	-0.360567	-1.18686	-0.63293	-2.71146	-3.61834	-1.84419	-2.84031	-4.73501	-3.34313	-4.47637	-3.93733	-2.52801	-3.5614	-1.72544	-1.72477	-2.03312	-0.539943	-0.681563	1.20427	-0.919836	-1.36727	-0.246158	-1.70119	-1.29158	0.726874	-3.05157	-1.99829	-2.58045	-2.48535	-2.45713	-1.68785	-4.23618	-3.74999	-1.7277	-1.88891
					0.256794	0.629025	2.68763	-0.829417	0.987862	-1.33771	1.14678	-0.469315	-0.487248	-0.70074	-1.06162	-1.22467	-1.02835	-0.944768	0.40881	-1.33218	-2.92235	-0.442306	-0.688456	-2.41334	-2.96337	-1.95561	-2.58009	-0.0606789	-3.9013	-2.15959	-2.89914	0.340904	-1.85326	-2.53613	-0.838705	-1.59616	-1.82823	-3.71818	-3.27195	-3.18024	-4.1262	-3.30147	-3.87395	-3.1719	-5.21591	-4.57871	-4.38409	-2.75654	-2.68749
					1.67438	2.04906	-0.368139	-0.269149	-0.123201	-1.066	-1.36672	0.233134	-0.717605	-0.456229	0.224834	-1.09136	-1.29198	-1.56216	-0.373039	0.561426	-0.716694	0.763822	1.04004	-2.27698	-1.00829	-1.19106	-0.300134	-1.7617	-0.596093	-1.29887	-2.56102	-3.1612	-3.56189	-4.25574	-5.23155	-3.95895	-5.68208	-4.35435	-6.04525	-5.82863	-7.24876	-7.17518	-5.62803	-5.83246	-8.24223	-7.66952	-5.77388	-5.66994	-7.97424
					3.27823	3.06966	2.36575	0.832784	0.535802	0.176829	-0.0843798	-0.732784	0.418541	-0.47997	-0.654927	-0.840624	-0.209185	-0.474659	-0.341639	-1.44653	-0.745471	-1.47839	-1.78826	-2.69588	-0.39169	-0.599266	-1.04762	-0.93422	-0.406475	-1.20299	-0.627538	-1.80445	-1.38513	-0.890505	-1.96417	-2.25423	-2.77432	-3.68907	-2.439	-2.90711	-0.329419	-0.836752	-2.49909	-3.17711	-2.78655	-3.43443	-3.43764	-3.93774	-3.69763
					-0.548812	-2.00308	-0.748046	1.41033	1.09551	0.864586	1.25457	2.04873	-1.26825	2.68428	1.1074	0.698139	-0.0361152	0.789623	4.46405	-0.14308	-1.30488	-0.411281	-3.17521	-2.14361	-0.962442	-1.23395	-0.579751	0.174115	-2.07464	-1.08303	-0.498426	-0.917531	-1.12938	-2.18196	-1.76026	-1.76151	-3.04961	-1.70023	-4.49968	-4.5633	-2.90118	-4.21367	-3.71132	-4.2023	-4.86984	-6.31287	-5.82553	-6.99729	-7.16503
					1.84547	1.06609	1.27481	0.357453	0.771152	0.689211	0.364343	2.16886	2.05468	0.872006	-0.199273	1.03007	1.46131	-0.190273	-0.895271	-0.830961	0.0958942	0.169184	-0.149175	-0.790541	0.916462	-1.99528	-0.61696	-3.15044	-1.61466	-2.93953	-3.38636	-3.18909	-4.31463	-4.22183	-5.02457	-5.66415	-6.73808	-5.682	-5.26177	-5.99497	-5.73216	-7.15125	-6.93625	-7.58378	-9.54316	-8.77072	-7.69836	-7.95078	-8.14525
					-0.893837	-1.01798	-1.24423	-1.35704	-1.33482	0.155743	-1.81422	-0.041549	-1.89217	-0.767896	-0.859623	-0.722972	-0.199293	0.970269	-1.68011	-1.08561	-1.35751	-2.44291	-2.05895	-1.46395	-0.0479321	-0.577929	0.590969	-0.858391	-0.621688	2.14421	1.18357	0.786281	2.81528	0.349065	1.9047	3.16549	3.24831	1.7161	3.18675	3.03569	3.32506	2.77827	3.50004	0.885602	3.03371	0.845542	0.927024	2.65013	-0.0209275
					5.00424	3.78979	2.30916	-1.05536	1.95306	0.4924	-0.688737	0.107957	1.81936	0.822717	-0.0630456	-0.906603	0.318086	-1.78173	-6.09088	-2.84175	-2.10602	-1.94711	-5.25682	-5.14715	-4.32721	-4.3855	-4.04758	-1.45844	-4.84351	-5.62589	-5.25443	-5.7446	-3.62971	-5.76885	-6.34151	-6.42913	-4.11042	-3.83337	-5.85673	-4.37485	-4.10855	-3.36718	-5.63207	-6.79681	-5.32628	-2.42518	-0.0347932	-0.354483	0.173006
					3.71274	3.85205	2.43771	0.70128	-0.513639	1.09052	0.555941	-2.23401	-1.43784	-2.22051	-2.64698	-3.55797	-2.57607	-4.39448	-5.01456	-4.74228	-6.15487	-5.58731	-4.95889	-7.98686	-5.1883	-3.18848	-2.73351	-1.81951	-1.68974	-1.06444	-0.890348	-0.175706	-2.61844	-0.507987	-0.417634	-1.46765	-0.61276	-0.0900002	1.9168	1.31424	0.866521	0.524705	0.491772	1.54147	3.24153	4.82774	2.57431	4.38872	2.88353
					1.4496	-0.455493	-1.37119	-1.37805	-1.52338	-0.119717	-1.64529	-1.68557	-0.598036	0.882261	0.911199	1.42612	0.0474623	-0.195842	-1.00556	0.581068	0.110001	0.691419	0.679556	0.21468	-0.444752	-0.752311	-0.480897	-2.36721	-1.83954	-2.07775	-0.308943	-2.73543	-2.98741	-2.99956	-3.12959	-3.57347	-5.3561	-5.53883	-4.85529	-6.09602	-6.12403	-4.49962	-5.40115	-5.629	-5.04829	-3.55083	-5.17026	-6.37025	-7.04757
					2.13479	0.371986	0.919561	0.916771	1.02201	0.50815	0.672657	0.858583	0.761347	0.127649	0.633126	-1.00305	-0.539019	-2.56342	-1.82546	-0.714052	-1.66914	-0.0780358	-2.4366	-2.41348	-2.13166	-0.323214	-1.20585	-3.31737	-2.95639	-3.81403	-2.38987	-3.32063	-2.21908	-4.9938	-4.78537	-4.51938	-5.7278	-7.11428	-4.97887	-5.77048	-5.13303	-6.65983	-5.58697	-8.43177	-7.82792	-7.82023	-8.40188	-9.56369	-9.40316
					1.80932	1.59514	1.48337	-0.987099	0.865823	1.98063	0.245021	-0.688464	0.321714	0.668939	1.58305	0.788312	-0.644324	0.190057	-0.532192	-0.497396	-0.237008	0.451123	0.262816	-1.49468	-1.3585	-1.14788	-1.47626	-1.98323	-2.30312	-3.61801	-2.53143	-3.01694	-3.06284	-2.0431	-2.03723	-2.70224	-3.34499	-2.65608	-2.63878	-0.877322	-0.871051	-0.95605	-1.0015	-2.52888	-2.34883	-1.39256	-1.59975	-1.1099	-1.02987
					0.364376	-0.309114	-1.02074	-1.20997	-1.11687	-0.944728	0.204987	-0.72486	-0.0273293	0.53821	-0.0597351	0.982345	0.466481	-0.0312873	1.18604	2.06769	1.26657	0.769686	1.50337	0.535837	-0.43854	0.228273	1.55706	2.65198	2.57773	2.02915	2.57005	0.454368	0.953513	1.0396	0.843662	1.76938	3.58336	1.96036	1.70452	1.03552	1.27627	1.76577	2.66693	3.50708	1.73562	4.03113	2.18529	2.11111	3.70386
					0.851904	0.100983	0.480464	0.600872	-0.390969	0.44746	0.176062	-0.970363	-1.23989	0.743091	0.237336	-0.243947	0.93572	0.313528	0.0832675	-0.830244	0.0573856	-2.09909	-0.53573	-2.26281	-2.67688	-3.36161	-1.29397	-1.2445	-1.64654	-2.09549	-3.31769	-3.25769	-3.36256	-3.33219	-3.73957	-2.33759	-4.41432	-4.48718	-4.72992	-5.75264	-4.98104	-4.97879	-4.45163	-5.35105	-6.74989	-6.77564	-6.7408	-8.37952	-8.08142
					0.823372	-0.149493	0.776901	1.11156	1.31695	0.889433	-0.643646	-1.5049	-0.28307	-0.803679	-0.290867	-3.84105	-1.7759	-1.82622	-4.65557	-3.34481	-0.756893	-2.69054	1.29476	0.421857	1.62517	0.769291	-0.67818	1.33184	-0.354147	-0.511922	-0.70501	-2.65516	-1.7695	-2.76202	-1.87498	-4.99858	-3.9533	-4.63515	-3.0213	-3.59909	-3.85511	-4.85426	-3.00686	-4.40667	-6.11466	-5.39847	-5.13554	-8.06684	-6.85133
					0.863484	0.215592	-0.328611	-1.51777	-0.00601566	1.85511	0.562132	1.57953	3.17227	1.3288	1.67376	1.88311	0.969403	-0.105955	2.10566	1.67722	0.0837144	1.4835	1.1674	-0.810263	-0.640651	-0.607363	-1.01834	-0.144168	-0.830858	-3.15583	-1.62848	-4.19188	-5.31224	-3.09301	-3.76948	-3.88105	-4.13477	-4.88942	-4.74204	-3.44548	-3.17373	-2.82866	-2.59301	-3.64414	-3.28402	-2.925	-3.67747	-1.89895	-1.20795
					2.07179	0.493574	1.38335	1.14162	-0.433977	-0.919429	0.151186	-0.875973	-1.16803	-1.54285	0.648034	-0.716899	-0.453837	-0.823038	-1.6723	-1.59705	-1.61481	-0.28439	-2.63904	-0.781638	-2.2442	-3.07052	-3.61318	-1.40527	-2.0798	-0.610618	-1.81865	-2.15561	-2.98399	-1.40023	-0.556646	-1.43799	-2.55453	-1.16322	-1.14615	-2.13744	-0.830677	-1.78916	-1.23998	0.380331	-0.305131	-0.0364676	-1.26934	-1.29591	-1.31074
					1.49984	0.378256	1.39921	1.51064	0.309227	1.64828	1.28147	-0.726067	-1.78054	0.540154	0.203543	-0.562241	0.800282	1.17475	1.50117	-0.769793	-1.03236	-4.27106	-1.10626	-1.15782	-0.607445	-2.4804	-1.47069	-1.90039	-1.8371	-1.1671	-2.97302	-2.87947	-0.721934	0.0321349	-1.23528	-2.49722	-1.13196	-0.638701	0.301863	-1.4512	-1.16209	-1.02456	-2.00425	-0.0507108	0.478398	-0.122249	-2.93846	-1.48628	-1.62532
					-1.2857	-0.298606	-1.0843	-1.06884	-2.54009	-5.09466	-0.507895	-1.89093	-0.707253	0.800372	0.693842	-0.454683	0.591035	1.02855	1.53791	0.970716	-0.248002	2.2505	1.23156	-0.276721	-3.04187	0.536643	2.3738	0.461839	0.517571	1.71977	0.204943	2.37414	1.70536	2.64224	2.7183	3.64872	3.72921	3.76101	5.70153	4.02019	0.639884	-1.20934	-2.61377	-2.3518	-3.38421	-1.96961	-2.41528	-2.67688	-0.641916
					1.41105	0.513876	0.989298	2.14879	-0.0295593	0.0188273	1.61504	0.424385	1.1513	-0.00372542	0.410643	-0.414608	-1.61611	-0.641239	-1.47653	-0.512566	-2.23776	-0.586929	-2.01632	-2.56992	-2.26255	-3.04464	-3.20784	-3.0833	-4.38447	-3.35579	-4.05036	-3.26399	-3.49568	-3.2416	-4.81529	-3.73343	-4.24636	-4.72463	-4.93699	-4.49944	-3.96224	-3.49158	-2.47339	-3.11059	-3.05582	-1.25143	-1.12483	0.0576519	0.283387
					1.88842	2.31789	2.28077	0.156922	0.323289	-1.22025	-0.974047	-0.719457	-1.20532	-1.73697	-2.62492	-1.72771	-2.61289	-2.93049	-2.31041	-3.09599	-4.46348	-2.54998	-3.94177	-4.29494	-4.32982	-4.02091	-4.41905	-3.19942	-3.42164	-2.6147	-2.8606	-2.51891	-2.63126	-2.38668	-3.41902	-2.77812	-3.10253	-3.00739	-1.49982	-2.42783	-2.15269	-2.49357	-2.98206	-2.81072	-2.44846	-2.28744	-1.37207	-2.08656	-0.627233
					-1.30385	0.305327	-0.529442	-0.113425	0.441811	0.174727	0.192931	0.34606	0.205485	0.623647	-0.0722906	0.26176	0.304814	-0.0803331	1.2629	-0.197578	1.23328	1.72393	0.270085	0.904155	-0.666055	-0.414735	0.396408	0.0830569	0.106796	1.45138	-0.204811	-0.34023	-1.50259	0.527887	-0.386016	-0.274071	-0.494606	-0.376479	-0.227427	-1.23339	-0.163436	-1.07341	-1.39818	-0.273436	-0.994645	0.0149413	-1.05502	-0.472247	-0.956276
					1.92205	1.68269	1.25354	0.442639	1.23122	-0.243655	2.13023	1.31045	2.17667	0.398442	0.594968	0.0433815	1.77167	1.83707	1.34044	1.12471	1.24449	0.471971	-0.373945	-1.42001	-1.36098	-0.918709	-0.619584	-1.65302	-1.28368	-2.48701	-3.07233	-4.25346	-3.02881	-4.37361	-4.64193	-3.53901	-6.79102	-5.41496	-6.1775	-5.89375	-6.24756	-5.00355	-4.53049	-5.0765	-6.34204	-6.69233	-7.61149	-7.35426	-7.52373
					-3.61536	-2.27764	-2.51573	0.111905	0.433978	-1.73789	-0.220649	-0.917143	-0.418083	0.613216	2.30068	0.54594	1.11798	1.83938	1.92148	1.3694	0.302743	-3.99489	-0.4159	0.514789	1.0605	1.39068	2.18343	2.02113	1.0301	3.04925	4.40102	3.79563	2.76749	3.92613	3.68536	4.23372	3.50814	4.08492	6.51764	7.50268	6.70334	5.63616	5.03517	4.34568	2.47892	4.73256	3.32229	2.97967	2.60108
					-0.122943	0.819356	0.442141	1.20764	0.094988	-0.383832	0.628363	-1.44376	-0.773447	-1.80802	-3.07673	-2.47473	-2.76995	-2.35004	-3.08957	-1.71168	-2.96809	-2.7236	-2.34814	-0.869895	-2.04883	-1.90944	-1.04224	-1.22578	-0.279444	-0.328085	-1.53049	-1.25344	-0.670906	-2.07706	-2.44034	-0.902997	-1.40569	-1.02872	-2.09044	-1.38631	0.192585	0.739882	-0.222441	0.734861	0.113344	0.623264	1.13395	1.10989	0.743809
					1.31983	0.41641	0.927505	0.211946	0.199274	-0.439602	-0.973095	1.96475	0.24646	0.757162	0.86919	2.82602	0.563506	0.64162	-0.0490896	0.32226	-0.846298	1.11703	0.553496	-1.31132	0.691234	-0.277127	0.207396	-0.557606	-0.273639	0.308603	-0.664102	-0.85074	-2.2232	-1.54244	-1.78891	-0.83146	-2.70381	-1.82815	-2.71083	-3.26464	-4.6813	-4.14962	-5.3485	-3.89648	-3.23713	-3.08466	-2.77242	-3.39024	-1.46927
					-1.78369	-3.72611	-1.44658	-2.04298	0.360556	-0.644055	0.0384904	0.542358	0.257631	-0.0793315	0.234022	1.19315	2.20046	1.90056	0.968725	1.43201	0.731905	1.20087	1.68841	0.0485928	-0.0371397	0.106593	-0.492032	-0.59665	-1.82239	-0.572391	-2.04859	-3.74285	-1.2149	-1.57702	-0.841829	-1.28198	-0.659738	-2.25882	-0.860799	-2.03214	-3.46558	-4.33936	-4.28266	-3.91832	-3.58343	-4.3559	-3.29317	-4.7106	-4.97906
				mean 60	0.246402	0.232238	0.0792274	-0.144282	0.315494	0.719341	0.281842	0.0801116	0.252387	-0.55112	-0.0842437	-0.297621	-0.243173	-0.377753	-0.0951744	0.124412	0.415133	-0.0367629	-0.134813	-0.243169	0.0879835	-0.53922	-0.499618	-0.29687	-0.0841781	-0.923025	-0.510327	-0.659427	-0.591947	-0.697314	-0.32705	-0.827178	-0.955517	-1.02871	-0.687517	-1.07589	-0.858792	-1.14883	-0.410218	-0.73195	-1.08929	-0.928505	-1.36112	-1.24902	-1.422
				mean 120	0.469414	0.487428	0.398568	0.395908	0.38555	0.248482	0.150812	0.0452384	0.142947	-0.084689	0.100743	-0.180612	-0.224627	-0.226833	-0.341557	-0.374811	-0.589944	-0.606322	-0.837439	-0.879713	-1.0461	-1.14308	-1.14626	-0.956586	-1.18123	-1.11163	-1.24391	-1.07612	-1.32275	-1.43658	-1.36252	-1.49193	-1.40457	-1.57719	-1.44053	-1.51242	-1.7139	-1.85589	-2.02294	-2.02237	-2.19003	-2.13324	-2.33094	-2.26506	-2.29123
[truncated: 231 more columns]

## Sheet: Fig 2b
			120 ITI group														60 ITI group
			rat														rat
		time	302	504	506	505	502	13	22	24	96	1	305	501	MEAN		23	95	91	2	3	14	92	MEAN
		8300	0.924139	0.181603	0.0968488	-2.48156	2.21676	1.3187	2.6904	1.0352	0.469847	3.31141	0.083783	1.49748	0.945383		0.328368	-0.630843	2.22806	4.60696	0.42007	0.0219912	2.02865	1.28618
		8400	0.313615	-0.226171	-0.33053	-1.92113	2.07728	1.6704	1.97195	0.917586	-0.13399	3.97834	0.123803	1.82194	0.855258		-0.0177794	0.194281	1.58253	2.27146	-0.376288	0.528614	1.0803	0.751874
		8500	0.264649	-0.129767	-0.612025	-1.66699	2.13119	1.14455	2.90707	0.620796	0.0191638	2.94978	0.0224362	0.306906	0.663146		-0.296856	0.293998	1.84092	2.65822	-2.53972	-0.0962219	1.03638	0.413817
		8600	0.449527	-0.434908	-1.08418	-1.84338	1.90031	0.947176	2.16558	0.96318	0.501512	2.49585	0.294702	0.302338	0.554809		-0.13961	-0.788319	1.2575	2.65942	-3.28226	-0.161229	0.93605	0.0687938
		8700	0.55	-0.493269	-0.336411	-1.90169	1.60216	0.204289	2.85488	0.13212	-0.603112	1.98935	-0.186354	0.829852	0.386818		0.861236	0.254885	0.518789	1.88258	-0.229086	0.401245	1.14031	0.689993
		8800	0.0628476	-0.784536	-0.920232	-2.15939	1.7505	1.03509	2.30787	-0.441422	0.910614	1.96917	-0.216491	0.873771	0.365649		-0.262206	-0.685517	0.338612	1.21445	-0.961219	0.484992	0.896593	0.14653
		8900	0.50789	-0.805627	-0.9925	-3.7802	1.66279	0.954809	2.22603	-0.547148	1.05981	0.309135	-0.406088	-0.0192717	0.014136		-0.659032	-1.20905	1.1003	1.74967	-0.671203	-1.42528	0.587668	-0.0752732
		9000	0.208691	-0.731373	-1.17138	-1.73447	1.17504	1.64034	1.93285	0.0757701	1.32091	-0.517108	0.000809522	0.358562	0.21322		0.289405	-0.646743	0.729306	2.23454	0.44874	0.393704	0.258021	0.529568
		9100	0.341678	-0.853841	-1.69005	-1.73393	1.58497	1.51567	1.90434	-0.469038	0.595194	-0.0874932	-0.26613	-1.69059	-0.0707674		0.379904	-0.916035	0.486822	1.73301	-1.4299	0.0278945	0.13875	0.0600645
		9200	0.320858	-0.742707	-1.36221	-2.51447	0.721795	0.127656	1.07219	-0.885966	0.438717	-0.0702056	0.38933	-0.404165	-0.242431		-0.631521	-1.48198	1.66936	1.34189	-1.26404	-0.384821	-0.244427	-0.142221
		9300	-0.0104019	-1.08448	-1.42792	-1.00436	0.300189	1.02007	1.453	-0.51903	0.0391343	-0.572442	0.243982	-1.50245	-0.255392		0.476639	-0.626819	1.66841	0.907319	0.678937	-0.155667	0.149566	0.442626
		9400	0.0251359	-1.17378	-2.08562	-2.34114	0.25547	-0.198613	1.64091	0.0787582	0.497957	-0.238008	-0.336516	0.0263542	-0.320757		-0.699843	-1.07174	0.888512	-0.0790998	-1.78486	0.65014	0.325484	-0.253058
		9500	-0.264486	-0.976112	-0.93573	-2.08095	0.641605	0.952333	0.967122	0.16252	0.415705	-1.29341	-0.0337185	-1.3909	-0.319669		-0.25114	-0.460417	0.75444	0.529462	-1.02179	-0.0823583	0.249907	-0.0402703
		9600	0.102847	-0.962017	-1.90551	-1.61237	-0.2355	-0.113487	1.35515	-0.51754	0.108823	-0.302443	-0.306012	-1.23763	-0.468807		-0.573688	-1.68978	0.586263	1.62999	-3.53787	-0.121208	0.642957	-0.437619
		9700	-0.323173	-1.16318	-2.1905	-1.78505	0.418311	0.173736	1.83406	-0.692547	-0.464518	0.802809	-0.377637	-0.642384	-0.367506		-0.0468709	-0.485819	1.21811	0.889218	-2.87322	-0.0539395	0.913747	-0.062681
		9800	0.413236	-0.636173	-2.47484	-1.84205	0.318017	0.426242	0.752578	-0.294772	0.0655121	-2.06707	-0.472539	0.0614532	-0.479201		-0.665842	-0.877654	0.659421	1.06266	-0.427494	0.154941	0.627049	0.0761549
		9900	0.000932839	-0.746899	-2.78784	-4.99783	0.445531	0.783499	0.592763	-0.247411	0.134109	-1.40384	-0.259311	-0.28118	-0.730623		-1.13855	-1.10158	1.02508	0.923088	2.16575	0.00819147	0.785406	0.381055
		10000	-0.0393161	-1.09626	-3.94334	-2.22438	-0.0715837	-0.023984	0.719153	-0.402812	0.213148	-1.04782	-0.235285	-0.575718	-0.72735		-1.4476	-1.70536	0.273718	0.757738	-2.29128	-0.250784	0.405886	-0.608241
		10100	0.259271	-0.797872	-3.8013	-2.45898	-0.446129	0.373158	0.341097	-0.296555	-0.192701	-1.84263	-0.248122	0.22402	-0.740562		-0.973283	-1.22195	0.433081	-1.2371	1.50162	0.251981	0.716635	-0.0755735
		10200	0.198791	-1.22783	-3.63016	-2.91902	-0.638428	0.635515	0.370043	-0.318017	-0.670311	-2.47902	-0.633147	0.0817293	-0.935821		-1.31567	-1.86556	0.2466	0.197763	1.13261	0.271912	0.992359	-0.0485689
		10300	-0.427729	-1.35517	-3.68934	-2.16084	-0.127485	0.293683	-0.281982	0.338242	-0.0175676	-2.46169	-0.754162	0.351215	-0.857735		-0.433442	-2.71361	-0.0890132	2.09794	-2.03382	0.675061	0.786742	-0.244306
		10400	-0.0592911	-1.00815	-3.32936	-2.70937	0.0605335	0.116754	-0.102589	-0.45846	-0.372837	-1.56831	-0.457511	0.77457	-0.759501		-0.82729	-2.98105	-0.294182	1.06918	-2.42197	0.0254184	0.700038	-0.675694
		10500	0.0484934	-1.31616	-3.67033	-2.55066	-0.248693	-0.0188597	0.259771	-0.234532	-0.797256	-1.31023	-0.374126	-0.266602	-0.873266		-0.641264	-1.89543	0.0402132	1.20467	-0.279947	-0.406126	0.405077	-0.224686
		10600	-0.0712151	-1.31949	-3.79705	-2.56926	-0.212946	-0.243814	-0.193808	-0.236896	-0.296143	-4.03985	0.00482995	0.220914	-1.06289		-1.44215	-1.86872	0.0679903	1.66144	-1.56049	0.732843	0.895848	-0.216177
		10700	-0.281826	-1.57461	-3.98602	-3.02152	0.145828	-0.225827	0.776823	0.660257	-0.373534	-1.69326	-0.38933	-0.486777	-0.870816		-1.00208	-2.92659	-0.668164	-1.36416	-0.342216	0.0387138	0.306811	-0.851098
		10800	-0.231874	-1.21966	-4.27297	-2.39287	0.246122	0.406444	0.5614	-0.269167	-0.0542111	-2.01398	0.0683518	-0.754879	-0.827274		-0.81996	-2.98807	-0.313774	-0.291807	-0.67249	-0.0418224	0.379813	-0.678302
		10900	-0.459836	-1.26748	-3.89955	-2.95984	-0.36444	-0.289923	0.155935	0.372526	-0.361142	-2.46454	-0.186721	-0.731364	-1.03803		-0.524724	-1.86526	0.518904	0.485168	-2.81227	0.529557	-0.396421	-0.580721
		11000	-0.154623	-1.17533	-4.03489	-3.08898	-0.0864002	-0.181639	0.566358	-0.0150267	-0.0857312	-1.9585	-0.667948	-0.101585	-0.915357		-1.2593	-1.75375	0.0583442	0.0741496	-0.364807	0.717414	-0.309105	-0.405293
		11100	-0.381277	-1.47015	-4.19768	-2.55118	0.272861	-0.155116	0.896044	-0.815408	-0.422856	-1.86852	-0.68769	-0.340279	-0.976771		-2.29712	-1.04564	-0.0981324	-0.780536	-0.608808	0.868661	-0.266999	-0.604082
		11200	-0.317929	-0.655021	-3.9563	-2.27653	0.304254	0.152416	0.114488	0.468632	-0.2908	-2.46109	-0.35903	0.31462	-0.746857		-2.74886	-2.77486	1.10265	-0.982086	-0.845504	0.351152	-0.0423041	-0.848546
		11300	-0.275796	-1.39105	-4.25561	-2.86139	0.00358887	0.0432542	-0.216007	0.237961	-0.326176	-2.93959	-0.732842	0.062818	-1.05424		-1.58963	-2.57442	-0.890652	-1.07602	0.873241	0.633893	-0.419506	-0.720443
		11400	-0.174684	-1.63131	-3.8979	-3.14845	-0.0601738	0.513066	-0.594652	-0.168346	0.105197	-3.23248	-0.727926	0.565462	-1.03768		-2.72043	-2.3593	-0.641628	-2.72255	-0.435297	-1.00282	-0.553213	-1.49075
		11500	-0.41463	-1.75576	-4.01109	-2.13099	0.0187203	0.162083	0.334946	-0.560574	-0.0745107	-0.348557	-0.790026	0.557845	-0.751044		-1.41321	-2.63442	-1.08739	0.597754	0.0512389	-0.420656	-0.39383	-0.757217
		11600	-0.777957	-2.16134	-4.5254	-3.23151	-0.167731	0.872085	0.115647	0.0978463	0.586919	-2.67513	-1.35811	-0.779231	-1.16699		-1.50552	-2.45904	-0.431983	-0.826413	-1.71167	-0.159768	-0.291646	-1.05515
		11700	-0.59106	-2.16366	-4.07419	-6.66162	-0.130102	0.226233	0.0422676	-0.920928	-0.451333	-1.51234	-0.974811	-0.202805	-1.4512		-2.18336	-1.81164	0.308682	-3.64104	-2.68851	-1.47561	-0.555413	-1.72099
		11800	-0.519981	-2.65093	-4.22619	-3.45597	0.145275	0.405595	-0.688871	0.0397442	0.854041	-2.97666	-1.34998	-0.749299	-1.26444		-2.63147	-1.34517	-0.0829751	-3.33005	-2.59058	-0.591893	-1.12369	-1.67083
		11900	-0.350619	-2.30578	-4.44325	-3.54493	-0.016186	-0.0941205	-0.57022	-0.0773583	0.10525	-3.68636	-1.3786	-0.895098	-1.43811		-2.54067	-1.79954	-0.0593556	-1.89023	-2.86292	-1.65687	-0.654224	-1.63769
		12000	-0.291446	-2.09976	-5.02418	-3.27103	0.15863	0.238047	-0.344991	-0.271719	1.35648	-3.33197	-2.04834	-0.765028	-1.30794		-2.59735	-1.61886	-0.504629	-1.84051	-0.562034	-1.1721	-0.483964	-1.25421
		12100	0.161028	-0.805381	-2.64407	-1.73777	-1.24025	0.516248	0.493278	0.342464	1.23166	-4.53368	-1.8552	-2.28141	-1.02942		-3.02526	-0.0575033	1.00183	0.953202	2.94127	-1.31509	-1.21079	-0.101763
		12200	0.164657	-0.522817	1.02203	-0.871371	-2.34357	-0.0773925	-0.630609	1.78446	3.06176	-1.18261	-0.996893	-2.75673	-0.279091		-2.14795	0.931488	2.35549	-5.35753	-1.97807	-2.4457	-2.82287	-1.63788
		12300	1.08594	-0.631038	1.16977	-0.783912	-0.45748	4.19241	0.211238	3.18048	4.10809	1.94707	1.16498	1.00915	1.34972		-0.0994369	4.84672	2.51716	3.40281	-0.603097	-0.452261	-0.908935	1.24328
		12400	4.60191	-0.996737	1.57682	-2.58607	0.826994	5.80235	5.8476	2.48082	6.97188	9.22568	3.98189	-0.463575	3.1058		4.76957	10.6681	3.59305	3.70961	2.51095	0.0429645	1.99128	3.89792
		12500	8.69708	-0.885528	2.43033	-3.19395	-1.82455	8.98275	8.76218	1.54627	8.21892	14.5592	5.9871	2.77208	4.67099		7.82917	14.3537	3.64224	9.24698	1.46201	-1.55261	4.74547	5.67529
		12600	12.6861	-1.07425	1.79763	-3.56632	-1.71593	9.26429	8.88725	0.923955	9.68896	14.3699	8.39343	1.50975	5.09706		12.3557	16.9559	4.33951	11.9032	-0.441632	-1.43029	6.70657	7.19842
		12700	16.4365	-0.70707	0.957969	-2.36971	0.0251761	10.4714	8.99281	0.0883826	9.30055	13.7759	9.94566	1.10151	5.66826		14.3045	19.0912	5.81519	13.3267	0.282412	-0.923058	8.33446	8.60449
		12800	19.2816	-0.392579	0.512438	-1.66171	-0.635327	11.0456	9.67954	-0.491404	11.5941	14.5012	11.1699	1.71522	6.35989		16.2078	19.7383	6.92123	15.7934	-0.260115	-0.672222	9.55954	9.61255
		12900	21.4879	0.230477	2.09256	-0.929723	-0.0112008	10.2827	8.49188	-0.152402	13.4907	14.7701	11.8191	2.17632	6.97902		18.0643	19.41	8.02341	19.0373	-2.10092	0.0520745	9.29364	10.2543
		13000	22.8634	0.519085	3.48796	-0.474885	1.3763	11.5378	8.28943	0.260244	13.21	14.4506	12.8565	3.03426	7.61755		19.2704	18.938	10.106	14.1162	-0.34423	-0.529846	9.16385	10.1029
		13100	24.1918	1.78623	3.6909	0.611582	1.90191	10.5645	7.43544	1.83751	15.1636	17.7398	14.1117	4.38304	8.61817		21.1541	19.4847	10.094	13.991	-0.61746	-0.896736	8.40823	10.2311
		13200	25.3306	3.0217	5.25784	1.50955	2.914	10.6473	6.59819	3.28939	16.0989	17.9988	14.7763	5.52154	9.41368		22.066	18.5991	10.0545	10.9709	0.112089	-0.412859	8.25936	9.94987
		13300	26.751	4.89016	6.73984	1.41212	3.31842	12.2245	6.29113	5.48996	16.5103	21.1636	15.5035	6.21558	10.5425		24.5615	18.8551	10.0812	13.1279	1.71144	0.359885	7.38945	10.8695
		13400	28.2337	6.73549	8.22475	2.51706	4.81999	14.2849	5.93821	7.69426	18.8472	22.9043	16.9314	7.28438	12.0346		25.7535	17.1359	10.7706	13.4207	0.816874	1.59713	7.96923	11.0663
		13500	30.0039	9.09427	10.0291	3.03184	5.16782	16.124	6.78862	12.0011	21.6572	27.2853	17.8457	8.44983	13.9566		27.709	17.491	10.613	11.1489	1.93512	2.38361	6.89074	11.1673
		13600	32.0358	12.0182	11.7277	3.61919	7.7525	17.997	7.08021	14.3442	23.3478	31.8082	19.3151	9.37944	15.8688		29.2028	15.6196	9.87056	10.1155	3.91662	3.10459	6.90326	11.2476
		13700	34.6754	14.6161	13.3157	4.84904	9.00272	19.8036	7.23969	19.464	25.1533	35.2272	20.3251	9.98393	17.8047		30.6384	15.0753	9.49784	4.17575	5.31269	4.76387	5.90982	10.7677
		13800	37.0329	17.4473	13.9796	5.6299	11.3259	21.1058	8.77931	21.499	26.8252	37.7755	22.1018	11.9879	19.6242		32.9033	15.046	8.90513	6.6462	4.86226	6.16471	6.4381	11.5665
		13900	39.3555	20.4134	14.703	5.69846	12.8086	23.5991	9.05319	23.8073	28.8607	43.8436	23.8001	10.9538	21.4081		34.1223	13.3414	8.82902	2.41527	9.14329	6.41124	5.96222	11.4607
		14000	41.842	22.9655	15.1228	6.28471	14.3965	25.474	9.2388	26.2549	29.3558	45.0529	25.2418	12.2727	22.7919		35.4687	12.7838	8.05297	3.91068	8.39721	8.45341	4.9657	11.7189
		14100	44.6754	25.2907	14.2814	6.19213	17.1261	27.331	10.1526	27.2982	32.2135	48.1633	27.2619	12.1975	24.3486		36.4582	12.85	7.24641	1.57452	8.42605	8.77106	5.49638	11.5461
		14200	46.0308	27.1793	14.526	6.24418	19.5861	30.24	10.3571	28.2237	32.128	50.9667	28.0957	12.2187	25.483		36.8133	11.4825	7.18317	0.930142	10.3919	10.6791	5.25679	11.8196
		14300	47.1776	28.5256	13.641	6.25071	20.4792	31.3309	12.5364	28.2811	32.3678	52.3419	29.6403	12.7519	26.277		37.5029	11.1128	6.84573	-1.21725	9.41347	11.3696	5.24103	11.4669
		14400	48.3061	29.9479	12.4943	5.66256	22.2468	31.3429	11.2229	27.995	33.5425	54.8313	30.6579	13.8114	26.8385		39.4538	8.99085	5.77892	0.589556	10.7744	11.2911	5.62966	11.7869
		14500	49.4419	30.3127	11.2159	4.97264	23.3037	33.9534	9.8805	28.2561	34.6734	54.9632	31.8732	14.3428	27.2658		39.0211	8.53508	6.27102	-1.12888	10.4669	11.1937	5.22121	11.3686
		14600	49.7825	30.622	10.1337	3.65024	25.0258	33.0167	10.4443	28.1476	34.3645	55.4841	32.6479	13.5839	27.2419		39.0981	6.74532	5.80267	0.895116	12.0572	12.46	5.08001	11.7341
		14700	49.6038	30.5439	8.51016	3.2419	25.5366	33.076	9.43988	26.3108	35.0838	53.0628	32.2728	13.9518	26.7195		37.8621	4.64924	5.57331	1.36674	11.6446	11.6723	6.42003	11.3126
		14800	48.6773	30.7029	6.9531	2.7297	24.9583	34.1062	9.60291	25.377	34.9186	53.6847	32.4519	13.4952	26.4715		36.4779	3.818	5.69496	0.719377	11.0696	11.5526	6.89638	10.8898
		14900	48.3787	30.0659	5.188	1.29764	25.278	32.8869	8.57339	23.4519	33.0535	52.9937	32.4148	14.6375	25.685		37.2689	3.45386	5.17051	-1.70686	10.6577	11.9862	6.69898	10.5042
		15000	46.7827	29.2174	4.56796	0.236948	25.3645	32.3049	8.60737	22.2014	33.1856	51.3451	32.8989	14.2692	25.0818		35.845	2.3927	4.84602	-2.1704	10.7756	10.9012	6.41332	9.85764
		15100	45.2413	28.7126	2.80294	-0.367849	25.2261	31.1855	8.48428	20.422	32.9968	50.1699	32.4008	13.5898	24.2387		34.3645	2.52398	4.67815	-2.82322	10.0119	10.1735	7.38271	9.47307
		15200	43.9022	27.4638	1.47996	-1.73101	25.1312	30.4096	8.39822	19.3401	30.2529	48.9327	31.9831	14.054	23.3014		34.9642	1.51461	4.25682	-3.57381	9.68075	8.87308	8.01465	9.10433
		15300	41.7839	26.5406	0.840609	-1.88812	23.3526	29.4866	6.68026	17.6139	28.1741	46.4696	31.552	13.2016	21.984		33.8347	-0.79691	3.88425	-5.07165	11.1992	8.15099	7.21547	8.34516
		15400	39.0842	25.5636	0.567311	-1.19176	22.7846	28.376	6.32009	15.9567	27.9191	44.9729	30.453	13.1525	21.1632		32.2446	-0.943413	4.16082	-2.90824	10.8843	8.73229	7.39573	8.50944
		15500	36.7327	24.3772	1.01692	-1.66133	21.8411	27.9374	6.30657	14.725	25.2976	41.7198	30.1388	13.0582	20.1242		31.5108	-0.747279	3.44207	-7.4776	9.91171	7.62642	7.80872	7.43927
		15600	34.0755	23.538	-0.537058	-1.27641	21.0946	26.4956	5.67417	13.2045	24.8288	41.7762	28.7085	13.1886	19.2309		29.6067	-1.40107	3.7362	-5.69022	9.42405	7.59927	7.47435	7.2499
		15700	31.2044	22.8104	-1.50001	-0.642439	19.2372	25.7262	5.1174	12.5448	24.3467	39.6916	27.9644	13.1133	18.3011		30.2232	-2.92464	2.68638	-6.4063	8.49853	6.65503	7.08851	6.54582
		15800	28.7105	22.0469	-1.4022	0.613276	18.5445	26.5445	4.21714	11.8433	23.6406	36.3534	27.3848	12.1238	17.5517		29.5392	-2.99194	2.64281	-3.67847	8.47448	5.57861	6.33041	6.55644
		15900	25.8765	21.8096	-1.62576	0.956022	17.127	25.7456	3.97867	9.99959	22.2359	32.8979	26.6337	11.3706	16.4171		28.0319	-3.44332	2.60348	-5.25313	8.46695	5.27709	6.77787	6.06584
		16000	22.9954	21.4114	-1.58722	1.72356	16.5171	24.9128	4.18701	8.81564	21.1208	31.1034	25.8661	12.1564	15.7685		27.1477	-3.35849	2.76306	-4.39645	7.59963	4.95126	6.9967	5.95763
		16100	20.4538	20.9168	-2.98994	2.50684	14.9915	25.495	3.87563	8.97079	20.7526	29.7485	25.4573	12.4721	15.2209		26.915	-3.69584	2.32875	-4.19461	6.99779	5.37675	7.55435	5.89746
		16200	18.2471	20.8812	-3.15072	4.13599	14.46	26.3165	2.76778	7.6387	20.6662	29.4948	24.9372	12.4492	14.9037		25.4065	-5.58116	2.61621	-8.14	7.57955	4.63692	6.27763	4.68509
		16300	15.7203	20.6926	-3.6037	5.02199	13.4543	25.2344	2.90184	7.2186	19.9329	28.0401	24.1736	12.763	14.2958		25.5032	-5.77015	1.94241	-10.4816	6.87717	4.7599	5.24257	4.0105
		16400	14.0994	20.7473	-4.19325	5.61486	12.3727	25.2369	2.67733	7.16285	18.9496	26.1295	24.5296	13.2992	13.8855		26.4465	-6.01257	2.02881	-10.9677	5.54631	5.38602	4.72843	3.8794
		16500	12.2555	20.3789	-5.06247	6.84455	11.6973	25.166	3.82834	6.66636	18.1624	24.1313	23.9973	12.6202	13.3905		24.5761	-7.89471	2.38613	-9.03173	6.60386	4.39032	5.27997	3.75856
		16600	11.0513	20.6316	-5.64421	8.3833	11.1385	25.127	0.52734	5.31917	16.8502	24.5072	23.9122	12.261	12.8387		23.876	-6.91993	1.9426	-8.73931	6.4965	4.6865	5.89543	3.89111
		16700	9.65039	20.4421	-5.43139	8.28057	11.6701	25.2329	3.62965	5.30588	16.6334	23.0235	23.194	12.6666	12.8581		23.7139	-7.4598	1.81912	-10.1165	7.77049	4.1347	4.37446	3.46234
		16800	8.89688	20.6755	-6.57863	9.34251	11.0413	25.034	0.895541	4.59853	16.0631	21.9893	23.4338	12.2891	12.3067		22.9147	-9.60356	1.45224	-8.14752	5.35363	3.84452	4.83869	2.95038
		16900	8.15802	20.737	-6.86905	9.96604	11.1732	24.0383	1.28213	4.48996	15.5477	19.4549	23.1545	12.0586	11.9326		21.7678	-8.1437	1.3295	-8.58016	6.30692	4.99511	5.15064	3.26087
		17000	7.74617	20.8385	-7.64072	11.2312	11.0852	24.1414	0.994485	4.39067	14.8535	18.2851	22.9323	11.5141	11.6977		21.3231	-9.66728	1.25887	-11.9337	5.51746	3.24487	5.28247	2.14654
		17100	6.79085	20.5298	-8.07751	11.5558	9.59684	24.8748	0.868751	3.99621	14.1741	17.9987	23.0414	12.3474	11.4748		21.144	-9.94866	0.558188	-13.3854	3.99251	3.70399	4.03794	1.44322
		17200	7.06633	20.566	-8.6293	11.824	9.29812	23.716	3.4046	5.26697	13.0366	16.4496	22.6995	12.0132	11.3926		19.8965	-9.43422	1.01542	-15.0499	4.29948	3.81029	4.24755	1.255
		17300	6.08822	20.8339	-7.62683	13.3353	9.18641	23.3358	0.934704	4.14222	12.7033	15.7938	22.9143	12.0129	11.1378		20.4753	-9.67818	0.247904	-11.8936	2.61865	3.88323	3.09418	1.24964
		17400	5.97716	20.5658	-8.92794	14.1561	7.89454	24.4684	0.536768	3.72632	10.6637	14.1352	23.3274	11.7922	10.693		20.1084	-10.2888	0.581435	-12.6279	5.47313	3.46208	2.15351	1.26599
		17500	5.7686	20.8731	-8.83797	14.1523	7.37644	24.142	0.580618	3.26732	9.96999	13.6146	22.6184	12.3529	10.4899		19.4484	-10.1776	0.231764	-17.9322	2.53634	3.79161	3.60733	0.215093
		17600	5.92191	20.1783	-8.74586	14.3195	7.02139	24.3761	0.255381	3.59785	9.91996	13.2812	22.6302	11.6422	10.3665		17.261	-11.0576	0.0658515	-14.2772	3.22418	2.83364	2.82439	0.124887
		17700	5.73223	20.0319	-9.45545	14.7692	6.84927	24.1968	-0.183319	2.61526	9.50695	13.1747	22.9343	11.9012	10.1728		17.6217	-11.1202	-0.583728	-9.90762	2.39898	3.1557	1.88066	0.492209
		17800	5.0671	19.7192	-9.3191	15.1336	6.22821	23.1816	-1.05182	2.80423	8.03401	11.9697	23.2304	11.6918	9.72408		18.2227	-11.4542	-1.18947	-10.3133	0.749235	3.02033	2.18544	0.174388
		17900	5.12761	19.4709	-10.4254	16.2398	6.39316	24.0762	-0.642814	1.44951	8.29712	11.2322	22.2923	11.6694	9.59832		17.7937	-11.9278	-1.59037	-13.7659	0.348116	2.87836	1.222	-0.720266
		18000	4.84558	19.5537	-10.881	16.1591	5.97702	23.5806	-0.731109	0.982983	6.9122	10.9671	22.1491	12.0453	9.29672		18.5652	-12.1398	-1.94281	-11.1502	1.40824	3.64099	0.238328	-0.197157
		18100	5.13947	19.234	-10.6844	16.4145	5.77777	23.796	-0.998276	0.974994	6.16453	11.1099	22.3803	10.5785	9.15727		17.3879	-12.6769	-2.16179	-13.1124	0.939068	3.88397	0.472598	-0.752502
		18200	5.09239	19.4341	-11.3328	17.53	5.10067	24.1992	-1.14227	1.34414	5.4348	9.78418	22.1367	10.663	9.02034		16.576	-13.7535	-2.45286	-14.3853	-0.0125242	4.29591	0.943815	-1.2555
		18300	5.35226	19.1904	-12.0256	17.5049	4.66509	24.3197	-0.140785	0.549142	4.6196	9.93521	21.8833	10.025	8.82319		17.0844	-14.5892	-2.22258	-15.4777	-1.17158	3.52805	0.691223	-1.73677
		18400	5.33878	19.0564	-11.6622	18.0935	5.3918	25.2124	-0.372284	0.337614	3.82597	9.97356	21.5905	11.7265	9.04271		17.2758	-14.0194	-2.91772	-17.7201	0.345768	3.62791	0.377572	-1.86145
		18500	5.47457	18.6087	-12.1738	18.2977	4.37394	23.9028	-1.68869	0.734758	4.02377	8.72076	21.6557	11.0118	8.57849		17.7355	-14.665	-3.03152	-13.515	-0.16032	3.59717	-0.477582	-1.5024
		18600	5.15342	18.4742	-12.8311	18.6424	4.82429	24.0587	-1.3472	-1.00305	1.92745	8.95061	21.0628	11.6768	8.29912		16.4699	-14.3458	-3.15579	-16.1306	-0.997824	3.27571	-1.27095	-2.3079
		18700	5.44524	18.4639	-12.3488	18.9278	4.38116	24.1184	-0.319929	-2.2894	1.39136	10.252	20.6999	10.4094	8.26091		18.0465	-14.3023	-3.49057	-15.7187	-2.35308	4.15749	-0.788747	-2.0642
		18800	5.78288	18.4215	-12.9026	19.2534	3.97561	23.9636	-2.14028	-0.89273	1.44577	8.19023	20.5736	11.308	8.08158		16.6914	-16.3553	-3.26451	-15.1529	-0.570442	4.53763	-1.52707	-2.23446
		18900	5.96288	17.8733	-13.5983	19.6562	3.16074	25.1925	-1.02853	-1.60014	0.562335	8.44873	20.1466	10.0689	7.90376		16.2134	-16.6717	-3.40764	-13.4679	-1.52749	4.73733	-2.19237	-2.33091
		19000	6.25366	17.8636	-13.2411	20.1954	3.51184	24.016	-1.01997	-1.23761	0.263903	10.2273	20.0702	8.86015	7.98027		16.9221	-16.9664	-4.2732	-14.3187	-2.36079	4.2422	-1.3386	-2.58477
		19100	5.85576	17.0479	-13.707	19.882	3.35538	23.984	-1.61516	-2.05016	-0.0187611	9.63877	20.104	10.4686	7.74544		15.5932	-16.9579	-4.38356	-17.665	-1.83662	5.03927	-2.55901	-3.25279
		19200	6.38354	17.152	-13.8817	19.7676	3.54223	23.5338	-0.132797	-2.55709	-0.988992	10.427	20.5886	9.92634	7.81338		15.5988	-15.985	-5.33258	-16.2508	-4.138	5.12161	-1.37315	-3.19417
		19300	5.99567	16.9066	-13.5657	20.7005	4.35625	23.0279	-0.860047	-2.89585	-0.755795	9.89406	19.3252	9.16309	7.60765		15.6409	-17.8489	-5.84459	-15.6433	-3.14109	5.09949	-2.484	-3.46021
		19400	6.01661	16.412	-14.8006	21.2051	3.56169	23.8747	-2.17354	-3.40166	-1.01088	8.17829	19.9523	9.42946	7.27028		15.125	-17.4139	-5.64603	-14.7367	-2.39461	4.58334	-2.34742	-3.26147
		19500	6.19002	15.9804	-15.4118	22.8363	2.73626	23.8738	-1.80457	-3.23582	-1.90282	7.46053	19.1693	9.29348	7.09875		14.884	-18.0085	-6.47229	-14.0893	-4.91201	5.12774	-3.15869	-3.80416
		19600	6.59916	15.94	-15.0209	22.393	2.83771	23.9739	-2.5872	-4.38156	-2.31728	8.26661	19.9842	8.91431	7.05017		14.1602	-18.853	-6.97901	-13.4703	-2.16536	5.4825	-3.09262	-3.55966
		19700	6.14806	16.2715	-15.5586	22.1914	2.49612	23.3536	-2.10067	-4.23976	-3.13076	7.25877	20.0617	9.54669	6.85817		15.2438	-18.332	-7.23332	-13.0874	-1.84288	5.28067	-3.19466	-3.3094
		19800	6.51861	15.9682	-16.0067	22.4283	2.51864	23.1798	-2.80888	-3.1427	-3.80312	8.59808	19.5009	9.26176	6.85107		13.9425	-18.7557	-7.72219	-12.2889	-3.48105	5.52207	-3.78564	-3.79556
		19900	6.91563	16.3202	-16.2953	22.8092	2.03862	23.1573	-2.23755	-4.00357	-2.82188	7.11894	19.4513	9.8564	6.85911		14.3863	-18.4041	-7.62455	-14.4915	-4.32941	6.01804	-3.60807	-4.00762
		20000	6.56824	15.674	-15.976	22.8069	3.20079	21.8926	-3.02705	-4.27865	-3.44719	7.06381	19.431	10.7443	6.72106		12.4242	-17.9598	-7.15923	-16.1798	-3.8484	5.01706	-3.67868	-4.48351
		20100	6.91333	17.2618	-15.8527	24.7637	2.41188	23.3823	-2.79919	-4.06715	-3.71722	6.65951	19.7855	9.39253	7.01119		14.8434	-18.5137	-6.15419	-18.5013	-2.09378	5.3633	-5.08673	-4.30614
		20200	7.33655	17.1269	-15.3261	24.6285	2.19149	22.0941	-2.14911	-5.53138	-4.15398	7.63338	19.0323	8.79689	6.80664		14.863	-15.2586	-5.79738	-18.0747	-2.11922	5.56884	-3.18084	-3.42841
		20300	8.76068	17.4138	-15.7499	23.6152	-0.144372	23.6253	-2.99633	-5.56378	-3.33891	9.93854	20.3708	10.2785	7.18413		13.518	-11.9666	-1.96884	-21.2811	-1.87541	5.66518	-6.67619	-3.51214
		20400	10.3748	18.0707	-14.6706	22.1617	-0.466339	22.0424	-1.52345	-7.62473	-1.66242	12.0376	20.864	10.3498	7.49611		15.2782	-8.27571	-1.80261	-17.3506	-1.20554	5.24536	-4.36168	-1.78179
		20500	10.766	18.717	-13.6978	21.965	-3.37214	25.8575	-1.32713	-7.26831	-1.1891	10.5932	21.1973	10.5104	7.72933		15.0652	-4.68204	-2.21154	-23.152	-2.41709	6.0076	-3.11667	-2.07237
		20600	10.6287	19.2777	-12.7784	22.0557	-7.96332	21.5785	-1.82962	-7.61127	-0.0134141	10.661	21.5273	9.90197	7.11956		15.8971	-6.55338	-2.29725	-29.6818	-2.4686	5.1435	-1.57737	-3.07682
		20700	10.3447	19.6063	-14.3102	19.8218	-8.48593	26.0203	-1.74757	-8.04577	1.09662	12.2156	21.5732	9.32867	7.28482		16.2527	-7.80257	-3.05897	-22.1179	-2.69801	6.31446	-2.04273	-2.16472
		20800	10.959	20.773	-14.7031	18.7985	-6.02756	23.4383	-2.11535	-6.47124	-0.0032772	11.2989	22.038	9.81895	7.31701		15.3831	-9.47348	-2.53528	-16.85	-2.20063	6.71752	-1.7581	-1.53098
		20900	11.2414	21.8265	-15.3436	18.048	-4.54566	22.5782	-3.47143	-6.88227	0.195339	11.6122	22.3692	9.572	7.26666		14.8141	-10.0087	-3.73754	-24.7646	-1.54617	6.99978	-2.50872	-2.96456
		21000	12.0871	22.4844	-15.113	17.3668	-1.37446	22.1357	-3.24384	-6.98758	-0.812512	13.152	22.5771	8.89509	7.59724		15.997	-9.9633	-5.96327	-21.507	-4.40941	4.75969	-2.08958	-3.31084
		21100	12.9306	23.6896	-16.1617	17.8588	0.0340165	21.4748	-4.06513	-7.76233	0.00371679	12.1195	23.2035	7.94425	7.60579		13.4544	-11.1165	-6.39637	-29.069	-7.01408	5.63166	-2.20847	-5.24547
		21200	14.2252	25.0606	-15.1695	17.3262	-0.330154	18.5656	-4.47751	-6.65797	-0.438248	11.8394	22.9612	8.67857	7.63195		13.8972	-11.6946	-6.44975	-27.3668	-3.70181	6.52737	-1.36976	-4.30831
		21300	15.9345	27.3431	-14.8067	16.4228	-0.294313	21.149	-6.02676	-5.51479	-1.99703	14.0517	23.0678	8.83798	8.18061		14.4845	-11.2046	-3.29011	-22.6199	-4.01276	7.70409	-2.90527	-3.12058
		21400	16.9752	28.8406	-14.9666	16.9038	-0.914106	20.9665	-4.65541	-4.68435	-2.14157	15.3533	23.3636	10.3509	8.78266		13.8072	-12.3873	-2.16333	-16.3958	-3.35003	8.90658	-1.5489	-1.87593
		21500	18.371	31.0361	-13.9557	16.5666	-0.901889	21.0626	-5.78675	-3.75611	-1.90871	13.964	23.8469	10.4898	9.08566		15.6226	-13.1473	-2.93784	-19.1617	-2.32808	8.71978	-1.56005	-2.11322
		21600	19.8204	32.646	-13.9186	16.9061	-2.483	20.7807	-5.01978	-3.53972	-2.73755	18.5528	24.5936	12.8051	9.86717		16.4571	-13.3667	-4.27934	-19.5266	-2.53949	8.35218	-2.06038	-2.42332
		21700	20.4891	34.881	-13.5531	17.4499	-3.57871	20.192	-4.60636	-2.11558	-3.665	21.2686	25.2071	14.4627	10.536		15.9174	-13.9688	-5.82954	-17.6078	-3.25414	10.8373	-1.62628	-2.21883
		21800	20.811	36.8167	-13.3334	16.872	-3.48237	20.2652	-1.79648	-1.40693	-2.77704	19.8557	25.6935	16.946	11.2053		16.9558	-15.6877	-6.28942	-25.9647	0.719855	10.7575	-1.65314	-3.02313
		21900	21.9469	38.9273	-13.6045	17.2635	-4.03433	21.3535	-2.65194	-0.896155	-2.97347	19.8242	25.6631	17.0459	11.4887		17.7276	-16.2475	-7.50422	-28.0079	-0.874985	11.5176	-2.19123	-3.65436
		22000	22.875	41.2265	-14.4842	17.9604	-3.8881	20.4729	-0.286498	0.637628	-3.97407	21.0106	26.8284	17.9765	12.1963		19.2202	-17.6169	-9.10676	-21.7064	1.1951	13.6698	-2.98354	-2.47551
		22100	24.544	43.0245	-14.3143	17.6735	-3.23675	20.3368	-1.67056	2.22817	-3.21586	20.2963	27.0704	18.5072	12.6036		19.1382	-15.833	-9.8225	-28.205	0.0828539	15.6893	-2.65056	-3.08582
		22200	25.4907	44.4716	-15.2744	17.1762	-2.23297	19.6652	-0.393614	2.25347	-3.80474	23.8733	28.8758	18.3999	13.2084		20.1136	-17.7431	-10.5548	-24.4097	-0.0685103	13.9975	-4.22601	-3.27015
		22300	26.7669	46.3008	-16.5362	17.632	-1.37346	20.6513	0.836082	2.72917	-3.21035	23.0964	30.1458	17.5529	13.7159		20.479	-20.9986	-10.5895	-31.2053	0.697672	15.0227	-4.37515	-4.42418
		22400	27.3643	47.0874	-16.9106	17.6341	-0.457975	21.6263	0.37658	2.4957	-3.99225	17.8022	29.8656	17.3449	13.353		20.9264	-22.1736	-11.5755	-27.5944	4.50051	16.2514	-5.17304	-3.54832
		22500	27.8533	48.2566	-18.1417	16.918	-0.0790196	19.286	1.26906	3.57411	-4.45878	19.9431	30.8014	16.004	13.4355		22.9888	-24.3374	-12.48	-26.045	3.67063	16.4286	-5.95146	-3.67512
		22600	28.4869	48.9036	-18.7551	17.0385	1.69579	21.0288	0.645632	4.50827	-6.84805	20.0449	32.0027	15.6802	13.7027		22.1608	-24.299	-12.7702	-35.7934	0.955099	16.1651	-6.25089	-5.69035
		22700	29.5002	49.1035	-20.9927	16.5335	2.19962	17.7433	1.42467	4.19042	-7.0363	17.232	32.6381	14.2181	13.0629		26.385	-26.2619	-14.2144	-31.61	5.99722	15.806	-6.82952	-4.38966
		22800	29.6185	48.4261	-22.9948	16.6404	4.00677	19.6298	1.16396	3.98611	-8.27214	15.7039	31.863	12.6556	12.7023		22.4429	-26.4647	-14.003	-32.8046	3.94978	14.169	-8.64101	-5.90738
		22900	30.7537	48.8554	-24.2209	16.3569	3.31544	17.9409	1.17443	4.45119	-9.85337	17.5518	32.3217	12.6892	12.6114		23.9672	-27.6969	-14.8445	-35.8066	3.30197	15.8718	-9.32308	-6.36145
		23000	31.9305	49.029	-24.4905	15.7082	3.51231	17.5937	0.870218	3.11227	-10.9491	17.8757	32.0354	10.2346	12.2052		24.3882	-29.1922	-13.9077	-28.0054	5.24175	15.7931	-8.83895	-4.93158
		23100	32.0555	49.3646	-26.9129	15.0434	3.56779	15.4773	1.79208	3.11208	-12.1566	14.9464	33.1588	10.3676	11.6513		21.683	-30.3155	-14.2029	-35.9561	4.49507	16.4528	-10.1152	-6.85127
		23200	32.0547	49.1274	-28.6388	14.2903	3.66085	14.4661	2.65092	2.71386	-13.9312	13.1561	32.2014	8.89977	10.8876		23.7534	-32.6144	-14.5854	-37.0533	1.3179	13.5487	-10.4691	-8.01461
		23300	32.0076	48.3586	-29.9643	13.8276	3.42232	13.5453	1.74919	1.34039	-14.3506	12.2135	31.6691	6.38904	10.0173		25.0023	-33.4181	-13.2188	-33.1055	2.91923	13.4027	-10.8113	-7.03278
		23400	31.2964	47.6052	-31.6377	13.5505	2.02908	11.969	0.523986	1.69349	-16.9877	10.7541	30.1569	3.90936	8.73855		24.7095	-33.3929	-13.3564	-28.343	3.48106	13.6417	-9.7529	-6.14471
		23500	30.7067	47.1903	-32.0313	12.6545	0.853915	9.72671	2.46607	1.21321	-16.6121	4.9353	29.2825	4.63866	7.9187		22.8517	-34.297	-13.1734	-29.8344	3.10725	12.4613	-11.394	-7.18267
		23600	29.0049	47.2947	-33.1292	12.3975	1.06881	10.5135	0.726818	0.469846	-19.6082	7.54982	30.6951	2.07789	7.42179		20.3742	-34.8491	-13.5383	-34.4653	0.383118	13.5926	-13.2367	-8.81992
		23700	27.6059	46.1781	-34.3994	12.1943	-0.205703	6.79802	0.782862	-1.69687	-19.7919	4.51248	29.3388	1.78429	6.09174		21.647	-35.3195	-13.8644	-28.0535	-0.237009	9.3839	-13.0002	-8.49196
		23800	26.5747	45.5879	-35.2432	10.7993	-0.346251	6.9371	1.05839	-2.64704	-22.219	2.01271	27.2413	0.768471	5.0437		18.8401	-36.0308	-14.0228	-36.669	1.05776	12.5862	-12.5483	-9.54098
		23900	25.5292	44.8007	-35.8293	10.1853	0.200555	4.47365	3.04564	-4.17333	-22.9122	1.07654	25.3671	0.201658	4.33046		20.7879	-35.6686	-15.3533	-28.5732	0.0372059	9.95159	-15.5265	-9.19211
		24000	24.1846	44.5296	-36.6538	9.7722	-1.44491	7.92785	0.210176	-5.43489	-24.426	-0.596709	23.9169	-0.533051	3.45432		20.4085	-36.4311	-14.5796	-34.9181	0.117182	9.04889	-14.6027	-10.1367
		24100	22.9317	44.554	-37.2531	9.50977	-2.14414	4.85828	-1.32793	-5.47056	-25.8154	-0.356517	23.813	-3.31267	2.49886		15.5947	-37.2809	-14.8029	-31.0151	-1.90014	8.97641	-14.6976	-10.7322
		24200	21.6045	43.3031	-38.2204	8.94946	-3.52313	3.47347	-1.42595	-8.46478	-27.5381	-4.49212	22.3153	-2.41404	1.13061		15.443	-39.1655	-15.6393	-29.0763	-2.16831	6.60411	-15.6772	-11.3828
		24300	19.866	43.9865	-38.4342	8.10044	-3.52393	3.80736	-0.992842	-8.31671	-28.7482	-5.55363	21.2698	-4.31953	0.595095		16.2998	-40.7831	-16.5729	-30.4065	-4.00943	7.86238	-13.8349	-11.6349
		24400	17.9838	43.381	-40.1045	8.12978	-4.89481	2.95797	-1.75121	-6.61909	-29.5738	-5.05944	21.2214	-5.17109	0.0416734		18.0441	-38.4906	-15.0116	-29.3859	-2.23455	8.61983	-16.1864	-10.6636
		24500	16.9357	43.3374	-39.9332	7.41313	-4.77837	1.86568	-3.53119	-10.4944	-30.7781	-9.1706	18.8165	-5.80922	-1.34389		15.9885	-40.4418	-16.8826	-28.6867	-4.00739	7.45115	-15.438	-11.7167
		24600	15.5685	42.621	-40.8954	6.55881	-5.38582	2.84432	-1.99929	-6.89759	-32.5329	-8.49508	18.1388	-7.82772	-1.52519		13.2897	-39.8459	-17.3351	-30.5647	-2.72857	7.45443	-17.2779	-12.4297
		24700	13.8117	43.204	-41.7372	7.99082	-6.38554	0.893166	-0.926781	-11.4436	-33.5404	-11.6332	18.0686	-8.34081	-2.50327		13.0451	-41.1833	-16.4222	-24.9144	-4.76446	5.99071	-18.8443	-12.4419
		24800	11.8673	42.5088	-41.6169	5.26641	-6.36158	3.26652	-2.45358	-8.68291	-35.558	-11.7388	16.3555	-6.85942	-2.83388		10.6128	-39.3158	-17.0973	-23.3757	-1.43512	6.63594	-16.6166	-11.5131
		24900	10.7035	42.2826	-42.2221	5.63698	-7.24141	0.704992	-2.03803	-9.44841	-34.6756	-11.2963	16.4271	-8.13132	-3.27484		11.1361	-43.3057	-16.5076	-26.9258	-3.70284	6.30871	-17.3469	-12.9063
		25000	9.24603	41.6323	-42.7968	4.96309	-6.90172	0.470756	-1.22153	-8.56673	-36.079	-15.9444	16.3238	-7.75374	-3.88565		9.18094	-41.322	-16.8488	-23.4961	-8.2282	3.77902	-18.3107	-13.6066
		25100	7.1444	40.9193	-43.8128	4.61617	-8.56678	0.219244	-0.846603	-9.66705	-37.6537	-16.2797	15.0135	-8.91796	-4.81932		8.41945	-44.0234	-15.7799	-24.6869	-5.62298	6.24239	-19.6166	-13.5811
		25200	6.19721	40.6152	-44.1833	5.58566	-8.90872	0.697385	-3.0266	-8.75857	-38.431	-20.0126	14.7688	-10.9556	-5.53435		8.74629	-41.2343	-17.0618	-25.6823	-6.85021	5.82315	-20.3099	-13.7956
		25300	5.15738	39.9305	-44.8384	4.40839	-10.2433	0.470596	-0.619654	-10.4101	-37.8604	-17.5429	12.9308	-11.7014	-5.85987		9.09343	-42.9792	-17.5043	-25.0026	-5.62341	5.7766	-21.4177	-13.951
		25400	2.7583	39.7905	-44.9967	4.22411	-10.6249	0.219934	0.248528	-11.266	-38.129	-18.828	12.8676	-12.2273	-6.33025		6.291	-42.6051	-17.5512	-22.6442	-5.30021	3.77575	-19.2842	-13.9026
		25500	1.81152	38.8828	-45.7857	4.17797	-11.2963	-1.48534	-4.96213	-10.3545	-39.941	-19.5774	11.9318	-12.2685	-7.40557		5.24298	-44.2692	-17.7284	-22.4898	-7.88145	4.4194	-18.913	-14.5171
		25600	-0.0042057	38.5716	-46.318	2.64543	-11.0151	-0.281473	-0.493577	-10.361	-40.341	-22.6076	10.9233	-12.5448	-7.6522		4.93793	-43.8564	-17.3757	-20.9487	-7.34428	3.59794	-20.8592	-14.5498
		25700	-0.982694	38.0134	-46.6944	1.91389	-12.8232	-0.410856	0.28828	-9.0181	-39.676	-23.5551	11.3926	-13.7335	-7.94048		3.58175	-46.1029	-18.4342	-20.2984	-5.99717	3.53686	-18.8647	-14.6541
		25800	-2.09672	37.6612	-48.1304	2.12971	-13.793	-2.80504	-1.1476	-8.60131	-41.3343	-24.5002	11.7043	-15.2708	-8.84868		3.90139	-48.4012	-17.6965	-21.0341	-8.57975	3.71703	-19.0767	-15.31
		25900	-3.16295	37.0326	-47.0737	1.84354	-14.9166	-2.98125	-1.67994	-11.0204	-42.7116	-27.5672	10.7804	-14.4033	-9.65503		-1.52642	-46.97	-17.9698	-18.2464	-11.5612	5.20876	-20.1692	-15.8906
		26000	-4.37307	36.4391	-48.5243	1.23584	-15.5817	-1.58239	0.545007	-9.86344	-42.4545	-28.0796	9.87403	-14.9514	-9.77638		2.35752	-45.9393	-17.0677	-19.2577	-13.4061	3.11198	-18.6133	-15.5449
		26100	-5.64644	35.6632	-49.0637	-0.466587	-16.5019	-3.81963	-2.20429	-11.1639	-43.7274	-27.5345	9.22937	-15.8389	-10.9229		-0.115682	-45.6563	-16.602	-16.5752	-6.81746	1.54936	-16.6519	-14.4099
		26200	-6.72272	35.1928	-50.337	-0.0859772	-17.7167	-2.94551	-2.08712	-9.31658	-42.5786	-30.3752	9.09672	-15.4215	-11.1081		3.07053	-46.4795	-16.3237	-15.9926	-7.33253	1.78608	-18.5998	-14.2674
		26300	-8.13205	34.1088	-50.3053	-3.44353	-17.8491	-2.72321	-0.971146	-11.9373	-44.85	-28.7816	8.66867	-16.2244	-11.87		-1.72897	-46.9415	-17.4029	-17.9586	-10.378	2.05894	-20.1865	-16.0768
		26400	-8.27032	33.9409	-50.0833	-1.63108	-18.3292	-3.67031	-1.51737	-10.2213	-44.617	-33.1914	7.81344	-14.9896	-12.0639		-2.94834	-48.4305	-17.475	-15.6556	-8.82843	1.48731	-17.7313	-15.6545
		26500	-9.35074	33.356	-49.786	-2.36774	-18.9443	-3.45241	-3.13858	-13.4032	-44.2272	-34.0381	7.65925	-16.9965	-12.8908		-3.7569	-49.273	-17.0085	-14.9457	-9.77733	-0.768312	-18.8359	-16.338
		26600	-10.3383	32.9153	-51.1086	-1.42402	-19.7641	-4.09311	-2.72733	-11.353	-45.5168	-32.7226	5.85999	-16.3775	-13.0542		-5.45847	-48.3907	-17.3454	-12.2365	-10.6971	0.465677	-18.0894	-15.9646
		26700	-11.0872	32.4479	-50.7579	0.279738	-20.462	-4.90875	-4.37289	-14.528	-46.0563	-32.1987	5.21512	-17.8803	-13.6924		-4.69746	-47.589	-16.773	-12.166	-12.961	1.06434	-18.1411	-15.8948
		26800	-11.7057	31.7225	-52.7435	-2.55968	-21.4175	-5.5347	-5.51789	-14.1801	-46.9237	-33.5379	4.44407	-18.3633	-14.6931		-6.30242	-50.0989	-17.0893	-13.0973	-7.66403	-1.14618	-18.1686	-16.2238
		26900	-12.2914	31.3534	-51.9782	-1.28952	-21.8628	-4.12782	-3.2111	-15.6457	-46.6781	-36.8771	4.49096	-16.9687	-14.5905		-5.36729	-50.7741	-17.4604	-11.275	-11.2786	-0.706335	-16.6913	-16.2219
		27000	-12.7281	30.7175	-52.2898	-4.43744	-22.6587	-6.18789	-5.32714	-14.5305	-47.1279	-34.5628	2.4279	-16.5648	-15.2725		-7.53957	-49.1881	-16.439	-7.60041	-11.8692	-1.79802	-14.9152	-15.6214
		27100	-12.8146	30.7448	-53.0282	-3.75603	-23.2755	-5.14894	-3.98484	-15.2936	-48.8954	-37.2457	3.58419	-17.2526	-15.5305		-6.50367	-49.2407	-17.5054	-10.5702	-8.59668	-1.82908	-16.6629	-15.8441
		27200	-14.0483	30.0104	-52.9598	-4.81747	-24.0715	-6.51339	-5.88836	-14.8773	-48.9335	-35.8997	2.51283	-16.425	-15.9926		-8.02306	-49.5534	-17.35	-7.22414	-10.0956	-0.545617	-15.6959	-15.4983
		27300	-13.7244	30.0474	-53.2375	-5.39976	-24.8302	-6.5838	-6.51702	-15.2507	-49.2757	-35.872	1.65481	-17.1229	-16.3426		-10.0437	-50.8117	-17.7645	-12.3092	-9.68063	-2.22261	-15.2997	-16.876
		27400	-14.4772	29.2737	-53.4034	-4.9588	-24.5906	-8.02452	-2.93493	-16.2137	-50.5306	-39.4445	0.740812	-17.4799	-16.837		-10.4382	-52.3025	-17.4529	-6.27271	-10.1122	-1.53178	-15.7339	-16.2635

## Sheet: Fig 2c
										120
										rew	rew
										iti bb	DA
										0.827	-1.5247
										1.302	-13.201
										1.382	0.535559
										1.917	-5.2967
										2.047	-15.5613
										2.052	-15.5985
										2.253	-25.0774
										2.354	0.554802
										2.505	37.1006
										2.631	-15.9515
										2.641	-23.1549
										2.661	-34.0746
										2.867	-9.54474
										2.953	6.87484
										3.045	1.31873
										3.05	-0.554966
										3.436	-9.9067
										3.442	-8.50965
										3.535	8.36404
										3.572	37.2966
										3.627	-26.2916
										3.868	-1.87436
										4.051	3.15252
										4.247	-8.70239
										4.432	19.9089
										4.533	17.0617
										4.555	-32.4081
										4.568	-5.08807
										4.689	-41.5792
										5.265	50.5583
										5.588	-13.6832
										5.773	68.1398
										5.921	6.43226
										6.228	25.5027
										6.332	-29.3555
										6.474	-0.452662
										6.625	-18.8364
										7.209	-13.134
										7.303	-9.198
										7.331	12.3297
										7.41	-18.501
										7.723	8.3197
										7.735	17.1754
										8.059	-14.982
										8.547	10.6536
										8.604	-30.8002
										8.799	-2.98766
										8.907	2.70061
										9.1	-20.0419
										9.276	-26.1404
										9.434	11.84
										9.438	22.8413
										9.496	-38.1604
										9.635	-3.37755
										9.807	23.8081
										9.945	66.1312
										10.826	17.7033
										10.869	23.4864
										11.169	-5.58889
										11.355	-30.3772
										12.225	0.801095
										12.472	21.8024
										12.719	8.3648
										12.815	29.4763
										12.893	-3.2588
										13.266	23.9454
										13.574	-2.37022
										13.647	-20.2791
										14.133	2.69581
										14.759	69.0142
										14.871	98.5962
										14.918	33.8749
										15.261	-0.265235
										15.266	0.718965
										15.362	7.21671
										16.087	20.3829
										16.165	-41.9064
										16.762	-36.8578
										17.307	-18.5029
										17.395	31.1096
										17.934	10.7653
										18.231	16.4834
										18.659	6.43107
										18.667	40.8436
										18.859	-10.3528
										19.364	35.2491
										19.57	12.8725
										20.206	7.50758
										20.504	-13.1648
										21.439	-16.5488
										21.635	20.8761
										21.764	31.535
										21.792	6.01537
										22.193	-9.47642
										22.946	20.8711
										23.082	-1.02599
										23.797	-16.7164
										23.962	1.66488
										24.707	31.5162
										25.074	1.16689
										25.831	31.1517
										26.809	1.76611
										28.208	-4.3624
										29.207	49.4993
										30.583	43.9012
										30.792	18.0222
										32.965	22.1605
										33.07	-11.6488
										33.14	44.1968
										33.398	16.5921
										35.613	27.0759
										35.937	-9.89115
										38.491	18.0117
										41.703	-7.7317
										43.05	25.1257
										44.757	29.7115
										44.844	63.9633
										45.724	25.4237
										48.472	22.0691
										62.25	42.8843

## Sheet: Fig 2d
										60
										rew	rew
										iti bb	DA
										26.589	26.7775
										11.202	60.6767
										6.568	60.857
										6.487	-47.884
										3.59	-41.7714
										2.152	-35.3988
										3.781	-34.4257
										10.967	-31.3969
										0.981	-29.9759
										1.754	-26.2047
										5.283	-25.9406
										3.71	-25.7956
										3.653	-23.8314
										6.252	-22.6963
										1.289	-22.5933
										10.569	-21.9163
										21.312	-21.9044
										5.914	-17.5874
										1.112	-16.9618
										1.339	-16.2836
										13.604	-16.0712
										1.034	-15.1141
										3.637	-14.7448
										2.049	-14.6606
										0.921	-14.6068
										2.525	-13.7568
										1.284	-13.212
										6.782	-11.1832
										6.184	-10.682
										10.683	-9.25208
										2.25	-9.09804
										5.091	-8.5482
										6.894	-8.54477
										10.423	-7.73199
										8.764	-7.44628
										2.679	-6.95148
										4.146	-5.95029
										6.575	-5.62369
										10.621	-2.38718
										1.81	-0.353616
										6.108	0.01214
										7.24	0.305733
										6.853	1.07553
										18.554	1.20992
										2.831	1.3135
										7.346	3.51109
										9.739	4.50027
										18.861	5.55204
										8.429	5.59145
										17.351	7.06693
										6.715	7.94046
										2.072	8.19286
										9.19	10.0392
										2.279	11.6957
										12.501	12.3333
										3.479	12.9788
										2.791	15.0674
										0.634	17.5328
										21.195	23.6774
										2.471	41.8751

## Sheet: Fig 2e
							120
							cue	cue
							iti bb	DA
							0.827	15.0205
							1.302	17.2483
							1.382	-6.44136
							1.917	18.0862
							2.047	27.7098
							2.052	28.1883
							2.253	32.5077
							2.354	18.3466
							2.505	22.0752
							2.631	14.1702
							2.641	8.10759
							2.661	0.26798
							2.867	3.97229
							2.953	18.4268
							3.045	6.82824
							3.05	44.5389
							3.436	16.7009
							3.442	-6.89179
							3.535	11.9881
							3.572	50.2725
							3.627	19.5865
							3.868	8.28193
							4.051	14.6713
							4.247	16.6746
							4.432	40.7389
							4.533	19.0298
							4.555	8.74633
							4.568	5.68817
							4.689	-2.45847
							5.265	18.9283
							5.588	8.07952
							5.773	4.05723
							5.921	29.8195
							6.228	34.8446
							6.332	1.10786
							6.474	38.8819
							6.625	-2.85245
							7.209	-7.55855
							7.303	14.1396
							7.331	23.1138
							7.41	5.07126
							7.723	27.8577
							7.735	15.7728
							8.059	9.87274
							8.547	21.2129
							8.604	9.22862
							8.799	10.1261
							8.907	6.29741
							9.1	14.9038
							9.276	-1.51506
							9.434	26.1811
							9.438	26.6704
							9.496	0.891244
							9.635	19.3362
							9.807	40.9308
							9.945	37.9611
							10.826	11.5682
							10.869	22.698
							11.169	5.8499
							11.355	14.9429
							12.225	25.838
							12.472	13.0942
							12.719	27.1508
							12.815	29.0123
							12.893	5.73696
							13.266	43.5685
							13.574	4.44824
							13.647	41.6323
							14.133	7.6906
							14.759	44.8494
							14.871	13.9526
							14.918	21.0694
							15.261	3.57226
							15.266	27.33
							15.362	29.6349
							16.087	26.7596
							16.165	40.9164
							16.762	41.1647
							17.307	9.72672
							17.395	17.3209
							17.934	34.3717
							18.231	16.8289
							18.659	7.17925
							18.667	27.1081
							18.859	16.5976
							19.364	39.9994
							19.57	41.328
							20.206	11.8094
							20.504	22.2836
							21.439	-2.78852
							21.635	30.6953
							21.764	35.7758
							21.792	12.7541
							22.193	5.9418
							22.946	35.5094
							23.082	15.4773
							23.797	-5.17982
							23.962	26.776
							24.707	42.8079
							25.074	10.0997
							25.831	40.9279
							26.809	1.8881
							28.208	17.8096
							29.207	62.979
							30.583	33.1344
							30.792	23.7763
							32.965	35.6978
							33.07	-10.2539
							33.14	22.6572
							33.398	11.5795
							35.613	27.7259
							35.937	8.2711
							38.491	21.4518
							41.703	8.54632
							43.05	13.9847
							44.757	40.1324
							44.844	36.1679
							45.724	32.6462
							48.472	34.6535
							62.25	22.9873

## Sheet: Fig 2f
									60
									cue	cue
									iti bb	DA
									26.589	7.93888
									21.312	13.8155
									21.195	16.4496
									6.575	29.1745
									6.853	30.6271
									11.202	31.7429
									2.679	33.1946
									0.634	33.7082
									2.279	35.4373
									6.568	37.1012
									2.471	43.3022
									5.914	-10.6962
									10.967	-5.10409
									12.501	-2.8738
									1.289	-0.941512
									7.24	2.02181
									10.683	2.12585
									3.59	2.37478
									6.487	2.47277
									18.861	2.9307
									3.781	2.98125
									0.981	2.98164
									3.71	3.43843
									6.184	3.6193
									10.423	3.70229
									9.19	3.72929
									10.569	3.76648
									1.284	4.37682
									1.112	4.59453
									5.091	4.62525
									13.604	5.25869
									2.152	5.28688
									1.034	5.73096
									10.621	5.79772
									1.339	6.57292
									8.764	6.5734
									0.921	7.04213
									2.25	7.21709
									6.108	7.28373
									2.072	7.59354
									2.049	8.44075
									3.637	8.68696
									18.554	8.9073
									4.146	9.43539
									8.429	9.80339
									7.346	10.0312
									6.894	10.1153
									2.525	10.1568
									6.715	10.4869
									9.739	10.8585
									1.81	11.6252
									17.351	13.3311
									2.791	13.3692
									1.754	13.5372
									6.782	13.9597
									5.283	18.0075
									3.653	18.8172
									3.479	19.6015
									2.831	28.3527
									6.252	29.0903
