# Supplementary material for: Manipulating the revision of reward value during the intertrial interval increases sign tracking and dopamine release
Source: PLoS Biol. 2018 Sep 26;16(9):e2004015. doi: 10.1371/journal.pbio.2004015 (PMC6175531; doi:10.1371/journal.pbio.2004015)
Supplement: S3 Data — (XLSX) [file pbio.2004015.s007.xlsx]

## Sheet: Fig 3a
		120 ITI
		time	-11	-10.8	-10.6	-10.4	-10.2	-10	-9.8	-9.6	-9.4	-9.2	-9	-8.8	-8.6	-8.4	-8.2	-8	-7.8	-7.6	-7.4	-7.2	-7	-6.8	-6.6	-6.4	-6.2	-6	-5.8	-5.6	-5.4	-5.2	-5	-4.8	-4.6	-4.4	-4.2	-4	-3.8	-3.6	-3.4	-3.2	-3	-2.8	-2.6	-2.4	-2.2	-2	-1.8
		1-3sessions	4.2	4	5.6	7.8	11.6	8.4	4	5	7.8	7.8	8.4	9.8	13.4	13.8	13.6	8.4	6.6	2.8	0	1.6	0.8	4	6.4	3	1.8	0	0	0.6	4	4	2.6	0	0	0	0	0	0	3.4	5.4	4	3.6	0	0	0	0	0	0
			0	0	0	0	0	0	0	0	0	0	0	2.6	4	3.8	4.2	4.4	4	4	3.8	2.2	0	0	0	0	0	0	0	0	0	0	0	0	0	0	0	0	0	2.2	3.8	4	4.2	2.8	0	0	0	0	0
			0	0	0	0	0	0	0	0	0	0	0	0	0	0	0	0	0	0	0	0	0	0	0	0	0	0	0	0	0	0	0	0	0	0	0	0	0	0	0	0	0	0	0	0	0	0	0
			16.4	11.8	8.8	15.8	15.4	14.8	16	14.6	10.6	8.2	3.8	4.2	6.4	14.4	20.8	24.6	27.8	39.6	43.2	48.4	45.2	37.2	36.2	33	31	31.2	28.6	25	26	31	28.8	31.4	27	20.2	25.8	20.4	20.2	19.4	16.8	19.4	15.8	10	7.6	3	4	4	4
			4.2	3.6	0	3.6	4	4.2	3.8	1	4	3.8	4	3.8	4	5	0.8	3.8	10.6	27	26.4	25.6	21.6	9.4	8.2	5.2	5.4	0.4	0.6	0	0	2	7.6	4.2	5.6	4.4	5.4	4.6	4	3.4	3.8	4.2	4	4	2	5.2	7.4	6.8	4.2
			1	0.4	4	4	0	3	8	4.4	1.6	0	0	3.6	2	8.2	7.8	4	6.2	11.4	11.6	9.4	1	0	2.6	4	4	1.4	0	1.2	2.6	7.4	3	0	0	0	0	0	0	0	0	0	0	0	0.8	0.4	3	2.4	0
			11.8	8	10.8	15.6	16.2	13.4	12.2	11.2	5.6	4	4	4	4	6.2	8	7.4	8.2	11.2	10	11.8	14.8	11.6	13	11.8	11	4.6	4	4	8.8	12.2	14.6	13.6	14.6	12.4	17.4	15.4	12	11.2	8	8.2	11.8	8	8	7.8	12.2	13	8
			0	0	0	0	0	0	0	0	0	0	0	0	0	0	0	0	0.6	1	4	5.6	5.6	6.2	2.4	0	0	0	1.4	1.6	0	0	0	0	0	0	0	0	0	0	0	0	0	0	0	0	0	0	0
			0	0	0	0	0	0	0	0	0	0	0	0	0	0	0	0	2.4	0	0	0	0.8	4.2	3.6	3.4	3.8	4.2	3.8	2.2	0	0	0	0	0	0	0	0	0	0	0	0	0	0	0	0	0	0	0
			7.8	5.4	1.4	5.4	11.6	12.4	11	7.4	3.8	5	4.2	6.4	8.2	6.4	7.6	8	9	8.2	6.8	7	8.2	11.8	14.6	11.6	12	14.2	13.6	12.2	11.6	13.2	18.4	13.6	8.2	9	10	10	4	4	8.2	11.8	10.2	4	4	3	7.4	8.4	8
			3.6	2.4	0	0	0	0	0	0	0	0	0	0	1	0	0	0	0	1.8	3.8	3.2	4.2	3.6	4	0.8	0	0	0.8	0.8	0	0	0.8	3.8	0.4	2.4	4.6	0.6	0	0.8	0	0	0	0	0	0.4	3	2	2
			4	4	4	0.6	0	0.6	1	0	0	0	0	1.4	4.2	4	0.8	4.2	3.8	4.2	4	3.8	4.2	3.8	5	5	2.4	4.2	6	4.2	4	4.4	4.2	3.8	5.2	5.6	4.8	8.2	4.8	8.2	7.6	3.8	0.2	0.2	4	0.6	7	5.2	2.8
			4	4	4	4	4	2.8	3.6	3.8	0	2.4	4	5.6	3.2	4	4	4	3.4	4	4	4	4	4	4	4	4	4	4	4	4	4	4	4	4	4	4	4	3.6	0	4.8	4.2	4	1.4	0	0	0	0	0
			4	4	4	4	4	4	4	3.6	3.4	8.2	8.4	9.6	5.2	3.8	4	4.2	4	3.8	0.4	6.4	15	14.2	9.2	9.8	8	4	4	0	0	3.4	4.2	4	2.4	0	0.2	4	4	4	3.4	4	3.6	4	4	4	4	5.2	4
			0	0	0	2.8	3.4	0.6	0	0	1.6	4	0.6	0	0	0	0	0	0	0	0	0	0	0	0	0	0.4	1	0	0	0	0	0	0	0	0	0	0	0	0	0	0	0	0	0	0	0	0	0
			8.4	11	12	8.4	4.4	7	12.6	16.2	15.4	14.6	5	2.4	4	4	6.6	5.6	4	1.4	0	2.2	3.6	21	18.8	16.8	15.4	10.8	12.4	8.2	4.8	5.4	8	9.6	1.2	5.2	7.8	3.4	0	0	2.6	3.8	0	0	2.2	0	0	0	0
			0	3.6	2.8	0	0	0	0	0	0	0	0	0	0	0	0	0	0	0	0	0	0	0	0	0	0	0	0	0	0	0	0	0	0	0	0	0	0	0	0	0	0	0	0	0	0	0.4	0
			6.4	3.6	3.6	3.2	4	2	2.2	2.6	0.2	2	3	2.4	1.8	3.6	4	2	0	0	0	0	0	0	0	0	0	0	0	0	0	0	0	0	0	0	0	0	0	0	0	0	0	0	0	0	0	0	0
			1.2	0	0	0	0	0	0	0	0	0	0	1	2.6	1.8	2	0	0	0	0	0	0	0	0	0	0	0	0	0	0	0	0	2	4	3.4	3.4	3	3.6	4	4	3.8	5.2	5.4	3.8	0.2	0	1	2.4
			11	8	8.4	8.8	6.6	5.2	8.2	8	8.4	11	11.6	8.2	8	7.8	8	8	8.2	9.8	10.6	8.4	9.4	10.4	12	11.8	11.8	12.2	12	4.6	1.8	2.8	6.2	6.8	4	4	4.6	8	6.6	7.6	8.2	11.8	12.2	10.2	12.8	15	11.6	10.2	11.4
			20.4	19	19.4	15.8	16	16.2	16	14.2	13.2	13.2	10.8	11.8	9.8	9.8	13.2	8.6	8	8	12.8	15.8	16.8	24.2	28	28.8	26.8	28.4	28	30.4	34.2	37.8	39	33.2	39	36.4	35.2	33	32	35	35.8	33.2	35.4	38.6	38.4	36.6	33.6	34.4	30.8
			8	8.2	6.4	3	0	0	0	0	0	0	0	0	0	0	0	0	3.4	2.2	3.8	4	0.6	0	1	3.8	4.4	4.2	11.4	11	12	15	14.8	11.8	12	10.6	9	8	6.2	5.8	12.8	17	21.6	18.6	20.4	21	22	26.2	21.8
			0	0	0	0	0	0	0	0	0	0	0	0	0	0	0.8	4	4	7.2	13	12.2	11.8	10.4	8	7.8	7	7.8	8	8.2	6.6	4	0	0	2	3.8	6.6	8	8	8	5.6	6.8	5.6	0	0	0	2.6	4	4
			0	0	0	0	0	0	0	0	0	0	0	0	0	0	0	0	0	0	0	0	0	0	0	0	0	0	0	0.8	0	0	0	0	0	0	0	0	0	0	0	0	0	1	0	0	0	0	0
			0	0	2	4	4	4	4	4	0	0	0	0	3	1	0	0	0	4.4	2.2	2.2	0.6	0	0	2.4	4	4	4.2	1.6	0	0	0	0	1.4	3.8	3.4	4.2	3.6	0	2.2	3.4	0	0	0	0	1.8	5.8	4.6
			4	4	4	4	4.4	7.2	7	4	4	4	4	4	0.8	0	0.6	4	5	6.2	9.6	12.2	12	12	12	9.4	11.2	9.6	5.8	4	4	6.6	10.8	7.4	5	3.8	4	4.2	4	2	4	3.8	4.2	4	1.2	0	0	0	0
			0	0	0	0	0	0	0	0	0	0	0	0	0	0	2.6	4.2	0.4	0	0	0	0	0	0	0	0	0	0	0	0	0	0	0	0	0	0	0	0	0	0	0	0	0	0	0	0	0	0
			0	0	0	0	0	0	0	0	0	0	1.6	4	4.2	4	4	0	0.8	0	0	0	0	0	0	0	0	0	0	0	0	0	0	0	0	0	0	0	0	0	0	0	0	0	0	0	0	0	0
			0	0	0	0	0	0	0	0	0	0	0	0	0	0	0	0	0	0	0	0	0	0	0	0	0	0	0	0	0	0	0	0	0	0	0	0	0	0	0	0	0	0	0	0	0	0	0
			0	0	0	0	0	0	0	0	0	0	0	0	0	0	0	0	0	0	1.4	4	4	2.6	0	0	0	0	0	0.2	3.8	0.2	2.4	3.8	0	0	3.8	14.2	12.6	9.6	8.4	8.2	7.6	7.6	11	10	5	4.8	2.6
			4	2.8	2.4	4	4	4	4	1	0	0	0	0	0	0	0.2	1.6	0	0	0	0	0	0	0	0	0	0	0	0	0	0	0	0	0	0	0	0	0	0	0	0	0	0	0	0	1.2	4	4
		4-10sessions	0	0	0	0	0	0	0	0	0	0	0	0	0	0	0	0	0	0	0	0	0	0	0	0	0	0	0	0	0	0	0	0	0	0	0	0	0	0	0	0	0	0	0	0	0	0	0
			0	0	0	0	0	0	0	0	0	0	0	0	0	0	0	2.6	4	4	2.4	0	0	0	0	0	0	0	0	0	0	0	0	0	0	0	0	0	0	0	0	0	0	0	0	0	0	0	0
			0	0	0	0	0	2.6	5.8	8	4.4	0	0	0	3.6	3.8	4	0	0	2	3.8	0.8	0	0	0	0	0	0	0	0	0	0	0	0	0	0	0	0	0	0	0	0	0	0	0	0	0	0	0
			0	0	0	0	0	0	0	0	0	0	0	0	0	0	0	0	0	0	0	0	0	0	0	0	0	0	0	0	0	0	0	0	0	0	0	0	0	0	0	0	0	0	0	0	0	0	0
			4.2	0.2	0	0	0	0	0	0	0	0	0	0	0	0	0	0	0	0	0	0	0	0	0	0	0	0	0	0	0	0	0	0	0	0	0	0	0	0	0	0	0	0	0	0	0	0	0
			0	0	0	0	0	0	3	3.2	3.4	0	3	4	4	4.2	4.8	4	3	0	0	0	0	0	0	0	0	0	0	0	0	0	0	0	0	0	0	0	0	0	0	0	0	0	0	0	0	0	0
			10.6	9.2	13.2	11.6	10.4	12.2	12.2	12	11.8	11.8	10	10.2	18.4	14.8	12.2	12	11.4	4.2	4	4	4	0.6	0	0	0	0	0	0	0	0	0	0	0	0	0	0	0	0	0	0	0	0	0	0	0	0	0
			8	4.4	0.8	3	4	4.8	3	4	4	4	0.2	0.8	4	2	3.8	0	17.8	22	15.6	3.8	0	0.2	3.2	0	0	0	0	0	0	0	0	0	0	0	0	0	0	0	0	0	0	0	0	0	0	0	0
			9	10.2	4.8	4	4.8	8.2	2.4	4	1.4	2	6.2	6.4	11	12.8	8	9.4	22.2	28.4	15.2	2.6	0	0	0	0	1.4	3.8	1.2	0	0	0	0	0	0	4	2.2	0	0	0	0	0	0	0	0	0	0	0	0
			8.2	7.8	4.8	2.8	0	3	2.4	2.2	2.8	2.4	3.2	0.8	4.4	2	0	1.8	8.2	6.2	1.6	0	0	0	0	0	0	0	0	0	0	0	0	0	0	0	0	0	0	0	0	0	0	0	0	0	0	0	0
			8.2	5	0.8	1.8	1.4	6.6	4.6	1.2	0	0	0	0	0	0	3	1.6	5.4	5.2	4.2	2	0	0	0	0	0	0	0	0	0	0	0	0	0	0	0	0	0	0	0	0	0	0	0	0	0	0	0
			7.2	11.4	8.8	7.6	8.6	8.8	6.6	12.8	8	9.4	8.4	8.4	7.4	6.2	2	0	11.6	7	0.4	0	0	0	0	0	0	0	0	0	0	0	0	0	0	0	0	0	0	0	0	0	0	0	0	0	0	0	0
			3.8	3.2	1.4	0	0	2	0	5.4	8	9.6	5.6	4	4.2	4.2	5.2	6	16	5	0	0	0	0	0	0	0	0	0	0	0	0	0	0	0	0	0	0	0	0	0	0	0	0	0	0	0	0	0
			0.2	0.6	4	3.2	2	4.6	4.6	0	0	0	0	0	3.4	4.8	3.4	1.2	10	4	1.2	0	0	0	0	0	0	0	0	0	0	0	0	0	0	0	0	0	0	0	0	0	0	0	0	0	0	0	0
			3	3.2	0.2	0	0	0	0	0	0	0	0	0	0	0	0.6	1.2	0.4	3.6	4	1.2	0	0	0	0	0	0	0	0	0	0	0	0	0	0	0	0	0	0	0	0	0	0	0	0	0	0	0
			0	0	3.4	4	4	4	4	4	1.4	0.8	4	4	4	4	4	3.8	3.6	3.8	3.8	4.2	4	4	4	4.2	4.2	1.4	0	0	0	0	0	0	0	0	0	0	0	0	0	0	0	0	0	0	0	0	0
			0	0.2	0	0	0	0	3.4	4.2	4	1.6	0	0	0	0	0	0	0	0	0	0	0	0	2.4	3.8	0.4	0	0	0	0	0	0	0	0	0	0	0	0	0	0	0	0	0	0	0	0	0	0
			0	0	0	0	4	4	4.6	8	5	1.8	3.8	0	4	5.4	5.4	4.4	7	0	0	0	0	0	0	0	0	0	0	0	0	0	0	0	0	0	0	0	0	0	0	0	0	0	0	0	0	0	0
			0	3.6	3.4	0	0	0	0	1.6	4	4.2	3.8	4.8	8.2	5	2.4	9.8	5.2	0	0	0	0	0	0	0	0	0	0	0	0	0	0	0	0	0	0	0	0	0	0	0	0	0	0	0	0	0	0
			16.6	15.8	17.2	15.8	17.2	17.2	15.6	12.2	12	16.6	20.6	18.6	15.6	12.2	15.4	16	11.4	4.8	1.2	9.4	14	9.4	11.8	12	7.6	8.4	5.6	4	4	3.8	4.2	4	3.8	1.8	0	0	0	2.4	4	3.8	4.2	1.8	0	0	0	0	0
			0	0	0	0	0.2	0	2	4.8	4	3.2	1.4	0	0	0	0	0	2.6	2.2	0	3.2	7.8	6.4	2.2	0.8	2	0	0	0	0	0	0	0	0	0	0	0	0	0	0	0	0	0	0	0	0	0	0
			0	0	4	3.8	4.2	4	5	4	3.8	0.4	0	1.4	4.2	4	0.8	4.2	3.8	4.2	4	3.8	4.2	3.8	5	5	2.4	4.2	3.8	4.2	4	4.4	4.2	3.8	4.2	4	3.8	4.2	3.8	4.2	7.2	3.8	0.2	0	0	0.2	5.2	5.2	1.8
			8.4	8	6.2	2	0	0	0	0	0	0	0	1.4	4.2	7.8	6	5.2	7.8	6.6	5.4	6.8	8	8	8.2	6	2.4	4.2	5	7.4	4	3.8	4.8	7.8	8.2	6	6.8	7.8	3.8	4.8	7.8	3.4	0	0	0	1.6	3.8	0	2.2
			4.2	3.8	4.2	6.8	6	4	0.8	0	0	0	1	4	4	3.8	4.2	4	4	4	3.8	4.2	4	4	4	3.8	3.8	0	0	0	0	0	0	0	0	0	0	0	0	0	0	0	0	0	0	0	0	2.4	5.6
			0	0	0	0	0	0	0	0	0	0	0	0	0	0	4	3.8	4	1.6	0	0	0	0	0	0	0	0	0	0	0	0	0	0	0	0	0	0	0.4	2.8	2	0	0	0	0	0	0	0	1
			0	0	0	0	0	0	0	0	0	0	0	0	0	0	0	0	1.2	0	0	0	0	0	0	0	0	0	0	0	0	0	0	0	0	3.6	1.8	0	0	1.2	0.4	3.6	0	3.4	2	0	0	3.6	2.4
			2.6	0	2.8	5	5.4	4.2	4	3.8	1.2	5.4	6.2	4	2.2	4.2	7.4	4	4	0.6	0	0	0	0	0	0	0	0	0	0	0	0	0	0	0	3	3.2	0	0	0	0	0	0	0	0	0	0	0	0
			4.2	3.8	5.4	4	2	1.8	6	4	5	5.2	5.8	8	4.8	4	7	8.2	7.6	4	3.6	0	0	0	0	0	0	0	0	0	0	0	0	0	0	0	0	0	0	0	0	0	0	0	0	0	0	0	0
			4.2	2.4	0	4	3.8	4.2	4.6	4	4	6.2	6.2	4	0.2	0	0	0	0	0	0	0	0	0	0	0	0	0	2.4	0.4	1.6	3.8	4.2	4	4	4	3.8	4.2	7	7.4	4	4.8	5.6	7.2	8	8	7.6	8.4	8
			0	0	0	0	0	0	0	0	0	0	0	0	0	0	0	0	0	0	0.4	0	0	0	0	2.2	3.2	0	0	0	0.2	0	0	0	4.2	4	4	8.8	5	0.8	0.8	4	1	0	0.6	3.2	10.2	2.8	0
			3.8	4	4	4	4	4	4	4	5.6	11.4	12	15.4	4	0	0	0.4	2.4	1	2	11.4	9.6	10.4	10.2	18.2	19	20.2	25.2	18	12.4	17.2	20.2	16.2	19.8	28.8	20.2	18.2	14.8	27.6	30.4	22.4	28.2	25.2	21.2	16	21.6	26.6	25.2
			4.2	8	7	7.4	8.2	8	7.4	4	3.8	4.2	7.8	11.6	10	7.8	8.2	8	8	8	8.8	12.8	13.4	5.6	4.2	14.2	17.6	15.8	19.4	20.4	19.2	20	14.8	10.8	11.6	12.6	12.6	9.2	8.2	24	18.4	16.8	22.8	27	22.8	18	12	20.4	27.4
			4	4	4	3.8	4.2	4	4	4	3.8	4.2	0.6	0.6	2.6	3.8	0.8	0	2.2	4	3.8	4.2	4	1.2	0.6	3.8	4	4.2	1.4	4	3.8	0.6	2.8	8	9.8	6.6	5.6	8.8	11.4	16	10.6	3.8	0	0	8.8	16	8.2	0.2	7.4
			4	4	4	3.8	4.2	4	4	4	3.8	4.2	0.6	0.6	2.6	3.8	0.8	0	2.2	4	3.8	8.2	9.6	6.6	4.6	3.8	4	5.6	2.8	9.6	10.6	3.6	3.8	9	13.8	9.2	5.6	8.8	11.4	16	12.6	10	3.4	6	16.6	19	16.6	8.4	16.6
			0	0	0	0	0	0	0	0	0	0	0	0	0	0	0	0	0	3.4	3.8	4.2	4	4	4	3.8	4.2	4	4	0	0	1.2	4.6	4.2	3.4	3	16.8	4.4	9.2	11	9.6	17	17.8	9.4	8.2	8.8	10	6.8	20.8
			0	0	2.4	4	4	0.2	1.6	4	1.6	0	0	0	0	0	0	0	0	4	4	3.6	4.6	3.8	4.2	3.4	1.6	0	0	0	0	0	2.4	4.2	2.6	1.4	6.4	8.8	8.4	4.6	0.4	0	5.2	9.6	10	7.4	7.2	9	12
			4.2	4	4	3.8	4	4.2	4	4	3.8	4	4.2	2.4	3.2	3.8	4	4.2	4	4	3.8	3	0	0	0	0	0	0	3.6	0.4	0	0	4.6	8	8	1.2	0.4	2.6	2.8	6.2	3.2	0	0	0	0	3.8	2.2	0.8	0
			0	0	0	0	0	0	0	0	1.6	2.8	0	0	0	0	0	0	0	0	0	0	0	0	0	0	4	3.8	4.2	4	2	0	0	0	0	0	0	0	0	0	0	0	1.8	2.4	0	0.6	3.8	11	9.4
			3	8	7.4	6.6	10.6	11.6	10.8	5	4	0.6	0	0	0	1	4	4.2	0.4	1.2	4	4	3.6	1	0	0	0	0	0	0	0	0	0	0	0	0	0	0	0	2.2	2	4	4	4.4	3.2	0	0	2.4	0
			0	0	0	0	0	0	0.4	0	0.2	4.2	2.8	0	0	3.6	3	2.2	0.2	0	0	0	0	0	0	0	0	0	0	0	0	0	0	0	0	0	0	0	0	0	0	0	0	0	0	0	0	0	0
			4.2	4.2	4.6	1.8	7.2	4.4	4.4	6.8	6.8	6.4	8.2	7	8	4.4	5	8	0.8	0	0	0	0	0	0	0	0	0	0	0	0	0	0	0	0.2	0	0	0	0	0	0	0	0	0	0	0	1.4	4	2.8
			17.2	14.4	12.2	15.8	15.2	21.2	18.6	20.2	24.2	20	15.4	15	15.6	15.4	23	23.6	13.2	4.2	4	8	11.8	11.6	13.4	11.8	8	4	4.2	4	1	0	0	0	0	0	1.6	4.2	4.6	3.2	0.8	3.8	3.2	3.6	0	0	0	0	0
			32.6	27.4	32.4	34.4	28.4	26	27.4	29	24.4	28	36.6	30.6	26.2	32.2	29.8	27.2	13.2	4	4	4.8	8.4	15.2	16	15.6	16	15.8	16.2	16	11.6	4.8	4.2	4	4	4	3.8	4.2	7	3	0	0	3.4	5.8	5.8	1.8	0	0	0
			6.8	4	4.2	10	12	8.6	7.4	8.2	11.2	7.8	10	9.6	12.6	9.8	8.8	9	5.6	4	0	1.8	4	4	2.2	2.2	3.2	0	0	0	0	0	0	0	3.2	4	0.4	0	0	0	0	0	0	0	0	0	0	0	0
			8	11	12.2	10	6.8	8.4	12.2	14.8	11.8	11.8	2.8	4	4.2	4	4	3.8	0.2	0	0	0	0	0	0	0	0	0	0	0	0	0	0	0	0	0	0	0	0	0	0	0	0	0	0	0	0	0	0
			6	8.2	8	8	8	7.8	8.2	6.2	4	3.6	0.2	4	4	1.4	0	0	0	0	0	1.2	4.2	4	4	4	3.8	4.2	4	4	4	3.8	4.2	5.4	4	4	5.4	8	4	2	3.8	4.2	0	0	0	0	0	0	0
			0	0	0	0	0	0	0	0	0	0	0	0	0	0	0	0	0	0	0	0	0	0	0	0	0	0	0	0	0	0	0	0	0	0	0	0	0	0	0	0	0	0	0	0	0	0	0
			0	0	0	0	0	0	0	0	0	0	0	0	0	0	0	0	0	0	0	0	0	0	0	0	0	0	0	0	0	0	0	0	0	0	0	0	0	0	2	0	0	0	0	0	0	0	0
			0	0	0	0	0	0	0	0	0	0	0	0	0	0	0	0.2	4	1.2	0	0	0	0	0	0	0	0	0	0	0	0	0	0	0	0	0	0	0	0	0	0	0	0	0	0	0	0	0
			0	0	0	0	0	0	0	0	0	0	0	0	0	0	0	0	0	0	0	0	0	0	0	0	0	0	0	0	0	0	0	0	0	0	0	0	0	0	0	0	0	0	0	0	0	0	0
			0	0	0	0	0	0	0	0	0	0	0	0	0	0	0	0	0	0	0	0	0	0	0	0	0	3.2	0	0	0	0	0	0	0	0	0	0	0	0	0	0	0	0	0	0	0	0	0
			0	0	0	1.4	4.2	3.8	4	4.2	2.8	0	0	0	0	0	0	0	0	0	0	0	0	0	0	0	0	0	0	0	0	0	0	0	0	0	0	0	0	0	0	0	0	0	0	0	0	0	0
			0	0	0	0	0	0	0	0	0	0	0	0	0	0	0	0	0	0	0	0	0	0	2	0	0	0	0	0	0	0	0	0	0	1	1	2.4	4	2.4	1	0.4	0.2	0	0	0.8	2.8	1	0
			3.8	4.2	4	3.8	4.2	3.8	4.2	4	3.8	6	10.2	10.6	8.2	7.6	8.4	8.2	8.4	11	8.8	13	15	16.2	13.4	15.4	14	11.8	6.4	10.2	14	10.2	9	12.2	12	11	9	11.2	12.4	12	14.8	11.6	10.4	16	13	9	12.2	16.8	20.4
			0	0	0	0	0	0	0	0	0	0	0	0	0	0	0	0	0	0	0	0	0	0	0	0	0	0	0	0	0	0	0	1.8	0	0	0	0.4	2.2	4	4	4	4	3.2	2.4	0	0	0	0
			20.2	20	20.2	19.4	20.2	20.2	20	21.8	23.2	24.4	24	24.2	24	27	28.4	28	21.4	26	34.6	44.6	48.4	44.4	46.2	44.8	41	44.2	50.2	41	40.2	46.6	45.6	43.4	48.6	46.2	39	39.2	42.8	44.4	45	40	43.4	47.4	48.6	44.4	41.8	38.6	42.2
			3.6	4	4	4	3	3.2	4	0.6	3.4	4	2.8	0	0	0	0	0	0	0	2.8	3.8	4.2	3.8	5.8	6.2	5.4	5.4	11.4	8.6	11.4	8.2	12.4	10	14	13.6	13	11.2	9.2	6.8	12	10.2	10.8	12	12	6.8	3.8	5.6	10.4
			7.8	8	6.6	3.8	4.2	4	4	4	3.8	4.2	5.2	4	4	3.8	4.2	4	4	4.4	6.8	8.6	9.4	13.2	14.4	9.8	13.8	15.8	19.8	20.2	19.2	18.8	12.6	12	12.2	11.6	12.4	13.2	13.2	12.2	10.6	7.6	11.8	11.6	14.8	16.2	13.6	12	12
			0	0	0	0.8	4	3.8	0	0	0	0	0	0	0	0	0	0	0	0	0	0	0	0	0	0	0.4	0.6	4.6	4.4	3.8	4	0.2	0.8	0.8	3	0.4	1.4	4	5.4	5.2	8.2	7.6	4.6	1	0.8	0	0.4	3.8
			0	0	0	0	0	0	0	0	0	0	0	0	0	0	0	0	0	0	0	0	0	0	0	0	0	0	0	0	0	0	0	0	0	0	1.2	0.8	1.2	4.6	5.6	2.6	0	0	0	0	0	0	0
			0	0	0	0	0	0	0	0	0	0	0	0	0	0	0	0	2.6	4	4	1.6	0	0	0	1.8	5	4	9.8	10.8	12	10.4	8.6	4	4	6.4	5.2	2.4	0	2.4	3.8	5.8	15	16.2	12.4	14.8	14.4	11	7.4
			0	0	1.2	0	0	0	0	0	0	0	0	0	0	0	0	0	0	0	0	0	0	0	2.6	2.6	4.2	5.6	8.2	4.8	0	1.6	5.6	8	8.4	7.8	4	5	3.8	4	2.8	12	11.8	8.4	2.2	9.6	12	11.4	8.2
			0	0	0	0	0	0	0	0	0	0	0	0	0	0	0	0	0	0	0	0	0	0	0	0	0	0	0	2.6	3.6	0	0	0	1.8	2.6	0	0	0	0	1.6	4.2	2.6	0	0	0	0	0	0
			0	3.6	4	3.4	0	0	0	0	0.8	4	2.8	0	0	0	0	0	0	0	0	0	0	0	4	9	13.6	9.4	5.8	0.8	0	0	0	0	3.4	2.6	0	0	0	0	0	2.6	2.8	0.4	1.4	3.8	5.6	8	4
			0	0	0	0	0	0	0	0	0	0	0	0	0	0	0	0	0	0	0	0	0	0	0	0	0	0	0	0	0	0	2.2	4	5.8	5.6	0	0	2.2	0	0	2.2	4	3.8	4	0.2	2.4	0	0
			0	0	0	0	0	0	0	0	0	0	0	0	0	0	0	0	0	0	0	0	0	0	0	0	0	3.8	0	0	4	1	0	0	0	0	0	3.8	0.8	0.4	3.8	4	1.2	2.2	5.8	3.8	0	2.6	4
			0	0	0	0	0	0	0	0	0	0	0	0	0	0	0	0	0	0	0	0	0	0	0	0	0	0	0	0	0	0	0	0	0	0	0	0	0	0	0	0	0	0	0	0	0	0	0
			0	0	0	0	0	0	0	0	0	0	0	0	0	0	0	0	0	0	0	0	0	0	0	0	0	0	0	0	0	0	0	0	0	0	0	0	0	0	0	0	0	0	0	0	0	0	0
			0	0	0	0	0	0	0	0	0	0	0	0	0	0	0	0	0	0	0	0	0	0	0	0	0	0	0	0	0	0	0	0	0	0	0	0	0	0	0	0	0	0	0	0	0	0	0
			0	0	0	0	0	0	0	0	0	0	0	0	0	0	0	0	0	0	0	0	0	0	0	0	0	0	0	0	0	0	0	0	0	0	0	0	0	0	0	0	0	0	0	0	0	0	0
			0	0	0	0	0	0	0	0	0	0	0	0	0	0	0	0	0	0	0	0	0	0	0	0	0	0	0	0	0	0	0	0	0	0	0	0	0	0	0	0	0	0	0	0	0	0	0
			0	0	0	0	0	0	0	0	0	0	0	0	0.8	0	0	0	0	1	3.8	4	4	3	0	0	0	0	0	0	0	0	0	0	0	0	0	0	0	0	0	0	0	0	0	0	0	0	0
			4	4	4	4	4.2	4.2	4	4	6.4	7.6	8.4	10.6	14.2	13	12.2	14.4	9.4	2.6	2.2	0	0	0	0	0	0	0	0	0	0	0	0	0	0	0	0	0	0	0	0	0	0	0	0	0	0	0	0
			4	4	4	4	4	4	4	4	4	4	4	4	4	4	4	3.2	4	4	2.6	0.4	1.6	0	0	0.2	4	4	1.6	0	0	0	0	0	0	0	0	0	0	0	0	0	0	0	0	0	0	0	0
			3.8	4.2	4	4	4	3.8	4.2	4	4	4	5.2	4.2	4	4	4	3.8	4.2	4	4	4	3.2	4.2	4	3.8	0	0	0	0	0	0	0	0	0	0	0	0	0	0	0	0	0	0	0	0	0	0	0
			0	0	0	0	0	0	0	0	0	0	0	0	0	0	0	0	0	0	0	0	0	0	0	0	0	0	0	0	0	0	0	0	0	0	0	0	0	0	0	0	0	0	0	0	0	0	0
			0	0	0	0	0	0	0	0	0	0	0	0	0	0	0	0	0	0	0	0	0	0	0	0	0	0	0	0	0	0	0	0	0	0	0	0	0	0	0	0	0	0	0	0	0	0	0
			7.4	2.8	0	2.8	2	0	0	0.6	0	1.4	4.6	8.2	8.6	3.8	0	0	0	0	0	0	0	0	0	0	0	0	0	0	0	0	0	0	0	0	0	0	0	0	0	0	0	0	0	0	0	0	0
			3.2	1	0	0	0	0	1.2	0.8	0	5.2	4.8	8.4	7.8	3.8	1.4	0	0	0	0	0	0	0	0	0	0	0	0	0	0	0	0	0	0	0	0	0	0	0	0	0	0	0	0	0	0	0	0
			2.2	0	0	0	0	0	0	0	0	0	0	0.2	0.8	0	0	0	0	0	0	0	0	0	0	0	0	0	0	0	0	0	0	0	0	0	0	0	0	0	0	0	0	0	0	0	0	0	0
	mean	1-3sessions	3.54375	3.03125	2.90625	3.2625	3.23125	3.11875	3.36875	2.85625	2.19375	2.46875	2.0125	2.375	2.5375	2.9125	3.29375	3.21875	3.51875	4.70625	5.125	5.7125	5.5375	5.74375	5.7	5.1875	4.94375	4.38125	4.4625	3.725	3.8375	4.63125	5.1375	4.63125	4.10625	3.89375	4.55625	4.6625	3.91875	3.90625	4.4375	4.75625	4.56875	3.65625	3.675	3.275	3.8625	4.24375	3.525
	mean	4-10sessions	3.2575	3.1225	3.0475	3.0525	3.11	3.2425	3.2325	3.32	3.1375	3.2825	3.2825	3.25	3.515	3.29	3.22	3.195	3.5325	2.7925	2.3275	2.415	2.6125	2.3575	2.4575	2.6525	2.6775	2.5925	2.76	2.4975	2.3325	2.0975	2.19	2.32	2.6975	2.7075	2.37	2.415	2.47	2.975	2.8775	2.76	2.83	2.895	2.81	2.6825	2.73	2.7425	3.1875
[truncated: 50 more columns]

## Sheet: Fig 3b
		60ITI
		time	-10	-9.8	-9.6	-9.4	-9.2	-9	-8.8	-8.6	-8.4	-8.2	-8	-7.8	-7.6	-7.4	-7.2	-7	-6.8	-6.6	-6.4	-6.2	-6	-5.8	-5.6	-5.4	-5.2	-5	-4.8	-4.6	-4.4	-4.2	-4	-3.8	-3.6	-3.4	-3.2	-3	-2.8	-2.6	-2.4	-2.2	-2	-1.8	-1.6	-1.4	-1.2	-1	-0.8
		1-3sessions	6.4	7.2	8	3.8	1.8	1.2	4.6	6.2	3.4	0	0	0	0.8	3.8	1.8	5.4	3.8	7	11.6	14.6	12.6	8.2	17.4	18.6	12.8	9.2	7	4	5.4	4	8	12.6	10.6	12.4	17.2	13.4	15.6	16.8	16.2	15.8	12.4	14	15	10.2	14.4	7.8	2.6
			5	9.4	8.2	7.4	5	2.6	2.6	3.8	7.6	6	4.2	8.6	13.8	14.8	12.4	8.8	14.2	9	7.2	3.2	0.8	0	0	0	2	1.8	2	0	0	0	1	4	5.4	5.2	4	4.2	3.8	7.2	9.4	8	8.2	7.8	7.6	1	0	0	0
			2.4	0	0	0	0	0	0.6	1	0	0	0	0	3.2	7.4	5.6	1.8	1.8	4.2	2	1.2	0	0	0.4	2.6	2.4	4	4	3.4	1.4	3.8	4	5.2	4.2	5.4	0.2	1	4	4.6	6.6	4.6	4.6	4	4	0.2	6	4.2	5.6
			3.8	4.2	5.2	4	4	4	4.6	8	4.2	6	4	4	10.6	6.4	4	4.4	9.4	12	18.8	20.4	24	29	26.6	19.2	19.6	16	14.2	13.8	17.6	20	26	20.8	13.6	9.6	8	9.4	11.6	14.8	9	12	11.8	12	9.4	3.8	6.6	3	4
			10.4	9.6	2.4	0	4	6.6	8	8.2	6.8	8	5	8.6	20	21.4	20.2	23.2	27	28.6	31	35.4	45.2	44.4	43.6	40.2	37.6	29.6	34.4	35.4	27.8	28.6	26.2	28	24.2	23.2	24.2	20.6	17.2	18.2	13.6	5	5.2	17.8	25.8	23.4	27	29	28.6
			4	4	6.2	7.6	7.4	8.4	8	7.4	4	4	4	4	8.2	11.8	24.6	35.8	44.8	47.6	54.4	54.2	37	34.6	29.2	30	31.2	42.4	49.6	46.6	36.4	30	26.2	25.2	31.2	35.6	38.8	39.6	38	34.2	41.8	44.2	32.2	30.2	33.8	26.6	22.6	15.6	16
			1.8	7.6	7.2	0	4.2	1.6	0	0	0	0	0	0	0	0	0	0	0	4	3.8	1.6	0	0	0.8	3.6	1	1.4	6.6	8.8	8.6	5.4	3.8	6.2	10.8	9.2	5.8	4	3.4	3.6	1.2	0	5.8	8	4.2	2.2	0	1.8	3.2
			3.8	5.6	11.8	12	12.6	12.8	11	10.4	7.6	8.4	7	7.8	8.2	7	8.4	9.4	14.2	8.4	3.6	4.6	4.4	4	4	3.8	4.2	1.6	3.2	8	6.8	5.8	0	0.2	4	3.8	3.2	0	0	3.4	7.4	4.2	2.2	3.6	4	6.2	8.4	7.8	8.2
			0	0.4	4.2	4	4	3.4	0	0	0	0	0	0	0	0	4.4	6	3.6	1.4	0	3.8	3.8	2.4	0	0	2.2	4	1.8	0	0	0.4	0	0.8	0	0	1.4	3	0	2	3.6	0	0	0	0	0	0	0	1
			12.2	18.4	14.4	6.4	8	8	8	8	6.6	0.8	1.8	5	12.2	14.2	16.2	16	17.2	13.6	8.6	4.4	4	4.6	7.6	4	3	0	0	0	2.2	6.8	7.8	8	7.2	4	8.2	11.2	17	20.2	19.6	20	21.2	24.4	23.6	19.8	19	18.4	19.6
			19.8	27.8	25	24.8	23.6	25.6	21	19.8	14	10.8	3.8	20.8	36.6	37	34.6	29.2	20.6	13.6	10	18	16.6	15.6	11.4	11.8	11.8	3.8	4.2	3.6	1.6	7.4	5.6	3.2	1.2	3.8	4.2	0.4	0	1.2	6.4	12.2	11.4	8.8	7	4	4	3.8	3.2
			8.2	8	8	5.6	0	0	0	0	0	0	0	13	23.2	21.8	21.6	17.4	6.2	1.6	3.4	0	0	0	0	0	0	0	0	0	0	0	0	0	0	0	0	0	0	0	0	0	0	0	0	0	0	0	0
			12	13.6	12.2	4.8	2.6	0	2.8	5.4	2.2	1.8	4	1.2	0	0	4.6	4	4.2	2	5.6	5.2	1.8	7.2	4.8	8.8	7.4	7.6	4	6.2	7.8	6.4	4.4	3.6	0	0	0	1.4	2.8	0	0	0	1.2	4	2.6	1.8	4	4.8	5.8
			0	0	1.2	0	0	0	0	3.6	1.4	0.6	4	0.2	0	0.4	6.2	3.6	0	2	5.4	3.8	0	0	0	1.6	0	0	0	0	0	0	0	0	1	0.2	1.8	3.8	4	4	4	7	3.6	1.4	5.6	4.2	7.4	1.4	0
			6.8	4	6.2	2.8	0.8	0	0	4.4	6	2	0	0	0	5.2	15.6	11.8	11.4	24	15.2	7.6	7.6	11	8.8	3.8	4	1	3.8	3.4	8.4	6.8	14.2	23	27.4	14	7	1.4	4.6	0.2	1	5.2	3.2	8.2	20.2	24.2	37.8	33.8	29.2
		4-10sessions	0.6	0	0	0	0.2	2.6	0	0	0	2	0	2.4	1.2	8.4	3.2	0	0	0	0	2	0	0.2	0.2	0.6	0	0	0	0	0	0	0	0	0	0	0	0	0	0	0	0	0	0.6	4	0.6	0	0	0
			0	0	0	0	0	0	0	0	0	0	0	1.2	4.2	6	10.2	10.4	8.2	8.8	5.8	7.4	4	4	4.2	3.8	4.2	3.8	4	4.2	3.8	4.2	3.8	4	4.2	3.8	4.2	3.8	4	4.2	3.8	4.2	3.8	4	4.2	3.8	4.2	3.8	4.4
			4.2	3.8	4.2	3.8	4	4.2	0	0	0	0	1.8	5.8	5.2	5.8	7	3.8	4	1.6	0.2	1.2	3.8	4	4	0	0	0	0	0	0	0	0	0	0	0	0	0	0	0	0	0	0	0	0	0	0	0	0
			0	0	0	0	0.2	3	4.8	5.4	1	2.2	3.8	9.4	12	3.4	5.2	4.2	4.2	5.6	1	1.8	0.8	0	0	0	0	0	0	0	0.2	4.2	3.8	4.2	1.2	1	1.2	0	1	0.6	3.8	2	0.2	4.2	4	3.8	0.6	0	0
			0	0	0	0	0	3	4.2	1.2	0.6	2.2	3.8	9.4	12.6	2.4	0.2	4	4.2	2	0	1.8	0.8	0	0	0	0	0	0	0	0.2	4.2	3.8	4.2	1.2	1	1.2	0	1	0.6	3.8	2	0.2	4.2	4	3.8	0.6	0	0
			0	0	0	0	0	0	0	0	0	1.2	0.2	10.6	16.2	7.6	0.8	0	0.4	3	0	0	0	0	0	0	0	0	0	0	0	0	0	0	0	0	0	0	0	0	0	0	0	0	0	0	0	0	0
			3.8	4	4.2	2.8	3.8	0.4	0.4	0	0.2	3.4	2.2	2	1.2	0.4	4.8	3.6	4.2	1.6	0	0	0	0	0	0	0	0	0	0	0	0	0	0	0	0	0	0	0	0	0	0	0	0	0	0	0	0	1.6
			0	4	1.6	0	2.4	4	4.8	7.2	3.8	4.2	3.8	12.2	27.6	44.6	55.6	59.8	51	40.6	32.4	25.8	18	7	6.2	16.4	23.4	23.4	21.2	10.6	12.6	22.8	20.8	23.6	24	24.6	30.2	27.4	31.4	25.2	23.6	28.6	33.8	31.2	31.6	21	17.8	16	15.4
			24.8	27	22.8	18.4	12.4	8	12.2	10.4	9	8.6	9.8	8.2	9.2	13.8	16.8	21.8	22.2	13	14.6	11	11.8	16.2	10.8	8.6	7.8	11.4	16.6	24	25.2	24.4	24.2	23.8	21.6	29.2	22.2	17.2	16.8	15.8	17.2	22	21.8	16.4	18.6	16	12.8	11.8	12
			4	3.6	0	0	0	0	0	0	0	0	0	0	3.4	3	0	0	0	0	0	0	0	0.8	7.8	8.8	8.4	6.6	4.2	8.6	11.6	9.6	11	7.6	4.6	3.6	0	1	6.6	9.4	18	24.6	24.8	29	23.4	14.4	7.6	6.6	11.6
			10.2	9.2	8.2	7.4	4.2	1.6	0	0	0.4	4	2.2	4.2	12.6	15.4	7.4	0	0	0	0	0	1.6	3.4	0	0	6.4	7.8	8.4	6.6	6.2	5	7.6	8.2	6	5	6.8	7.8	6.8	1.4	0	0	0	0	0	1.2	6.6	9	12
			6.8	3.8	10	7	0.4	0.2	4.4	6.6	2.6	3.6	0	1.2	0	3.4	4	1	0	0	0	0	0	0	0	0	0	0	0	0	0	0	0	0.4	4	3.8	4.2	1.6	0	0	2.8	4	1.2	3.8	0.8	0.2	3.8	8	8.2
			7.8	2.2	4	3.8	4	0.2	1	5.8	9.4	11.8	5.6	5.4	4.2	3.6	0	0	0	0	0	0	0	0	0	0	0	0	0	0	0	0	0	0	0	0	0	0	0	0	0	0	0	0	0	0	0	0	0
			0	0	0	0	0	0	0	0	0	0	0	0	0	0	0	0.4	0	0	0	0	0	0	0	0	0	0	0	0	0	0	0	0	0	0	0	0	0	2	3.6	0	0	0	0	0	0	0	0
			0	0.8	1.2	0	0	0	0.4	0.6	0	0	1.2	0	1.4	3.8	4	3.4	0	3.6	0	0	0	0	0	1.8	1.8	0	0	0	0	0	0	0	0	0	0	0	0	0	0	0	0	0	0	0	0	0	0
			0	0	0	0	0	0	0	0	0	0	0	0	0	0	0	0	0	0	0	0	0	0	0	0	0	0	0	0	0	0	0	0	0	0	0	0	0	0	0	0	0	0	0	0	0	0	0
			0	0	0	0	0	0	0	0	2	0	0	0	0	0	0	0	0	0	0	0	0	0	0	0	0	0	0	0	0	0	0	0	0	0	0	0	0	0	0	0	0	0	0	0	0	0	0
			0	0	0	0	0	1.4	0	0	0	0.6	4	4	4.6	3.8	4	4	7.6	8.2	7.6	8.2	8	8	6.8	6.8	8.2	8	8	8.2	7.2	1.6	0.2	0.2	3	3.8	3.6	4	4	4	3.8	4.2	4	4	1.2	2.2	0	0	0
			0	0	0	0	3.6	4	4.2	4	3	0	0	0	0	0	0	0	0	0	0	0	0	0	0	0	0	0	0	0	0	0	0	0	0	0	0	0	0	0	0	0	0	0	0	0	0	0	0
			2	5.2	4	5.2	16.4	12.2	11.4	12	11.6	10.2	4.2	7.4	12.2	8	8.2	6.4	3.2	0	0	0	3	6.6	14	11.6	13.4	9.4	6.8	3	11.2	9.2	8.2	14	18.8	19	12.4	9.4	8.2	12.4	14.6	13.4	12.8	15.6	17	15	18.4	10.2	15.2
			1.8	2.2	0.8	0.8	0	0	0	3	3.8	0	0	1.4	0	0	0	0	0	0.6	0	0	0	0	1.4	3.8	7	9.4	6.4	3.2	8.6	9.6	11.6	10.2	12.4	10.4	7.8	8.2	9.8	10	7.2	9.6	15.8	20.8	18.4	14.6	14	9	14.8
			16.2	16.4	17.2	16.2	15.8	17.2	20.4	18.8	24.6	28.8	21.2	20.2	15.6	10	4	3.8	4	4.2	4	4	3.8	4	4.2	4	4	3.8	4	4.2	4	4	3.8	0.6	0	0	0	0	0	0	3.6	3	0	0	0	0	0	0	0
			16	16.4	15.4	14.4	12.2	18.2	13.6	12.8	16.6	21.6	16	10.2	4	3	0	0	0	0	0	0	0	0	0	0	0	0	0	0	0	0	0	0	0	0	0	0	1.2	4.2	3.8	4	4.2	3.8	1.6	0	0	0	0
			6.6	11.8	13.4	15	14.6	12	10.8	5	4	9.4	14.2	12.2	1.8	0	0	0	0	0	0	0	0	0	0	0	0	0	0	0	0	0	0	0	0	0	0	0	0	0	0	0	0	0	0	0	0	0	0
			7.6	8	8	11.2	10.6	6.8	12	10.4	6.4	12.6	13.4	5.4	0	0	0	0	0	0	0	0	0	0	0	0	0	0	0	0	0	0	0	0	0	0	0	0	0	0	0	0	0	0	0	0	0	0	0
			5.8	6	2.6	0	3.6	4.4	7.6	7.4	7	8	9.4	7	0	0	0	0	0	0	0	0	0	0	0	0	0	0	0	0	0	0	0	0	0	0	0	0	0	0	0	0	0	0	0	0	0	0	0
			0	0	1.4	0	0	0	0.4	0.2	1.2	0	0	25	49.8	48.2	37	19	8.2	2.2	0	0	0	0	0	0	0	0	0	0	0	0	0	0	0	0	0	0	0	0	0	0	0	0	0	0	0	0	0
			3.2	5	4.2	9.8	12.8	9.4	6.6	6.2	5.6	6	4.2	43.4	77.2	72.6	68.6	40.8	22.8	12.2	13.4	7.2	2.2	1	0	0	0	0	0	0	0	0	0	0	0	0	0	0	0	0	0	0	0	0	0	0	0	0	0
			6.6	4.2	4	6.6	6.6	3.8	4	0	0	0	0.2	33.8	57.2	50.4	27.6	5.2	4	0.4	0	0	0	0	0	0	0	0	0	0	0	0	0	0	0	0	0	0	0	0	0	0	0	0	0	0	0	0	0
			15	16.4	11.2	11.4	10.2	8	4.6	5.2	7.6	11.4	16.6	42	53.6	47.6	41	22.4	13.6	8.6	5	4	1.4	0	0	0	4	4	0.6	0	0	0	0	0	0	0	0	0	0	0	0	0	0	0	0	0	0	0	0
			3.8	0.8	7	7.8	9	10.6	8	7	4.4	7.8	13.4	41.2	53	50.4	41.4	18.8	14	3.4	3.8	4.2	0.2	0	0	0	0	0	0	0	0	0	0	0	0	0	0	0	0	0	0	0	0	0	0	0	0	0	0
			24.4	21.8	16.4	13.2	11.8	19.6	19.8	15.8	11.8	12.8	10.2	53.6	68.6	66.2	63.6	29	7.6	5.6	4.8	0	0	0	0	0	0	0	0	0	0	0	0	0	0	0	0	0	0	0	0	0	0	0	0	0	0	0	0
			7.2	6.8	3.4	3.8	4.2	4.4	0.8	0	0	0	0	0	0	0	3.4	3.8	0	2.4	2.8	0	0	0	0	1.4	4.2	1.2	0	1	2.2	4	8.2	6	0.4	0	3.8	3.8	0.8	0	0	0	3.2	7.2	8.8	6	7.6	7.2	10.4
			5.6	7.2	7.6	5.4	4.2	6.6	0.8	0	0	0	0	0	0	0	0	0	1.6	4	5.8	5.8	0.4	0	0	0	0	1.2	0.8	0	0	1.2	0.4	0	3.2	3.6	0	0	3.2	1.6	6.2	7.6	1.6	8.4	16.6	11	9	7.8	8.2
			0	0	0	0	0	0	0	0	0	0	0	0	0	0	0	0	0	0	0	0	0	0	0	0	0	0	0	0	0	0	0	0	0	0	0	0	0	0	0	0	0	0	0	0	0	0	0
			0	0	0	0	0	0	0	0	0	0	0	0	0	0	0	0	0	0	0	0	0	0	0	0	0	0	0	0	0	0	0	0	0	0	0	0	0	0	0	0	0	0	0	0	0	0	0
			0	0.6	0	0	2.4	4	4	0.2	0	0	0	0	1.2	3.8	4	0.4	0	0	0	0	0	0	0	0	0	0	0	0	0	0	0	0	0	0	0	0	0	0	0	0	0	0	0	0	0	0	0
			0	0.6	0	0	2.4	4	4	0.2	0	0	0	0	0	0	0	0	0	0	0	0	0	0	0	0	0	0	0	0	0	0	0	0	0	0	0	0	0	0	0	0	0	0	0	0	0	0	0
	mean	1-3sessions	6.44	7.98667	8.01333	5.54667	5.2	4.94667	4.74667	5.74667	4.25333	3.22667	2.52	4.88	9.12	10.08	12.0133	11.7867	11.8933	11.9333	12.04	11.8667	10.52	10.7333	10.3067	9.86667	9.28	8.16	8.98667	8.88	8.26667	8.36	8.48	9.38667	9.38667	8.42667	8.26667	7.56	8.13333	8.69333	9.32	9.21333	8.2	9.61333	10.8533	8.50667	10.48	8.76	8.46667
	mean	4-10sessions	4.84211	4.94211	4.54737	4.31579	4.52632	4.57368	4.34737	3.82632	3.59474	4.53684	4.24737	9.96842	13.4158	12.7789	11.1053	7	4.86842	3.46316	2.66316	2.22105	1.57368	1.45263	1.56842	1.77895	2.44211	2.36842	2.13158	1.93684	2.44737	2.73684	2.82632	2.81579	2.75263	2.86316	2.56842	2.21579	2.49474	2.40526	3.04737	3.4	3.35263	4.03158	4.05789	2.98947	2.71053	2.35263	2.99474
[truncated: 39 more columns]

## Sheet: Fig 3c
			120 iti
			time	-13.8	-13.6	-13.4	-13.2	-13	-12.8	-12.6	-12.4	-12.2	-12	-11.8	-11.6	-11.4	-11.2	-11	-10.8	-10.6	-10.4	-10.2	-10	-9.8	-9.6	-9.4	-9.2	-9	-8.8	-8.6	-8.4	-8.2	-8	-7.8	-7.6	-7.4	-7.2	-7	-6.8	-6.6	-6.4	-6.2	-6	-5.8	-5.6	-5.4	-5.2	-5	-4.8
			1-3sessions	0	0	0	0	0	0	0	0	0	0	0	0	0	0	0	0	0	0	0	0	0	0	0	0	0	0	0	0	0	0	0	0	0	0	0	0	0.6	4	3.4	0	2.2	2.4	0.4	2.4	2.8	1.2
				0	0	0	0	0	0	0	0	0	0	0	0	0	0	0	0	0	0	0	0	0	0	0	0	0	0	0	0	0	0	0.2	2.4	0	0	3	6.8	0	0	2.4	1.8	5.6	7.2	3.2	0	0	3.8
				0	0	0	0	0	0	0	0	0	0	0	0	0	0	0	0	0	0	0	0	0	0	0	0	0	0	0	0	0	0	0	0	5.8	14.6	8.2	7.2	0.8	7.2	6.8	2.2	4	2.2	7.6	19.4	18.2	17.2
				0	0	0	0	0	0	0	0	0	0	0	0	0	0	0	0	0	0	0	0	0	0	0	0	0	0	0	0	0	0	0	0	0	0	0	0	0	0	0	0	0	0	0	0	0	0
				0	0	0	0	0	0	0	0	0	0	0	0	0	0	0	0	0	0	0	0	0	0	0	0	0	0	0	0	0	0	0	0.8	0	1.8	5.6	13	4.8	0.4	4.8	7.6	5.6	6.8	6.2	7.4	8.4	7.8
				0	0	0	0	0	0	0	0	0	0	0	0	0	0	0	0	0	0	0	0	0	0	0	0	0	0	0	0	0	0	0	0	3.2	5.4	9.8	11.4	12	4	6.8	7	15.2	11.6	11.8	19.2	26.2	28.4
				0	0	0	0	0	0	0	0	0	0	0	0	0	0	0	0	0	0	0	0	0	0	0	0	0	0	0	0	0	0	0	0	0	0	0	0	6	12.6	10.6	12.4	11.4	12	14.6	12	16.6	12
				0	0	0	0	0	0	0	0	0	0	0	0	0	0	0	0	0	0	0	0	0	0	0	0	0	0	0	0	0	0	1.4	3.4	4.2	2	0	0	0.2	10.6	13.6	6.6	10.8	11.8	13.8	21.8	26.6	23
				0	0	0	0	0	0	0	0	0	0	0	0	0	0	0	0	0	0	0	0	0	0	0	0	0	0	0	0	0	0	1.2	3.4	4	3.8	4.2	4	3.6	2.2	4	7.4	8	11	11.8	11.6	11	13.6
				0	0	0	0	0	0	0	0	0	0	0	0	0	0	0	0	0	0	0	0	0	0	0	0	0	0	0	0	0	0	0	0	0	0	0	0	0	0	0	0	0	0	0	0	0	0
				0	0	0	0	0	0	0	0	0	0	0	0	0	0	0	0	0	0	0	0	0	0	0	0	0	0	0	0	0	0	1.2	1.8	0.2	0	0	0	0	0	0	0	0	0	0	0	0	0
				0	0	0	0	0	0	0	0	0	0	0	0	0	0	0	0	0	0	0	0	0	0	0	0	0	0	0	0	0	0	0	0	0	0	0	0	0	0	0	0	0	0	1.6	3.8	2.6	0
				0	0	0	0	0	0	0	0	0	0	0	0	0	0	0	0	0	0	0	0	0	0	0	0	0	0	0	0	0	0	0	0	0	0	0	0	0	0	0	0	0	0	0	0	0	0
				0	0	0	0	0	0	0	0	0	0	0	0	0	0	0	0	0	0	0	0	0	0	0	0	0	0	0	0	0	0	0	0	3	3.8	4.2	4	4	4	3.8	4.2	4	4	4	3.8	2.6	0
				0	0	0	0	0	0	0	0	0	0	0	0	0	0	0	0	0	0	0	0	0	0	0	0	0	0	0	0	0	0	0.2	0.6	0	2.2	4.2	3.8	1.2	0	0	0	0	0	0	0	0	0
				0	0	0	0	0	0	0	0	0	0	0	0	0	0	0	0	0	0	0	0	0	0	0	0	0	0	0	0	0	0	0.6	0	0	0	0	0	0	0	0	0	4.4	1.2	0	0	0	0
				0	0	0	0	0	0	0	0	0	0	0	0	0	0	0	0	0	0	0	0	0	0	0	0	0	0	0	0	0	0	9	3.2	1	4.4	7.2	2	0.4	3.8	6.8	6	4.8	6.6	7	11	8	6.6
				0	0	0	0	0	0	0	0	0	0	0	0	0	0	0	0	0	0	0	0	0	0	0	0	0	0	0	0	0	0	2.2	0.8	0	3.2	0.8	4.2	5.6	4.2	2	4.8	2	5	10.2	1.6	3.2	8.4
				2	0	0	3.4	1.8	0	0	0	0	0	0	0	0	0	0	0	0	0	0	0	0	0	0.2	2.8	0	2.2	2.2	0	2.4	4.2	4.6	0.8	3.8	6	5.8	1.6	3.8	2.8	4.4	15	6.8	2.8	9.4	6.6	9	10.4
				0	0	0	0	0	0	0	0	0	0	0	0	0	0	0	0	0	0	0	0	0	0	0	0	0	0	0	0	0	0	0	0	0	0	0	0	0	0	0	0	0	0	0	0	0	0
				0	0	0	0	0	0	0	0	0	0	0	0	0	0	0	0	0	0	0	0	0	0	0	0	0	0	0	0	0	0	0	0	0	0	0	0	0	0	0	0	0	0	0	0	0	0
				0	0	0	0	0	0	0	0	0	0	0	0	0	0	0	0	0	0	0	0	0	0	0	0	0	0	0	0	0	0	0	0	0	0.6	3.4	4.2	0.8	0	0	0	0	0	0	0	0	0
				0	0	0	0	0	0	0	0	0	0	0	0	0	0	0	0	0	0	0	0	0	0	0	0	0	0	0	0	0	0	0	1.2	0	0	0	0	0	0	0	0	0	0	0	0	0	0
				0	0	0	0	0	0	0	0	0	0	0	0	0	0	0	0	0	0	0	0	0	0	0	0	0	0	0	0	0	0	0	0	0	0	0	0	0	0	0	0	0	0	0	0	0	0
				0	0	0	0	0	0	0	0	0	0	0	0	0	0	0	0	0	0	0	0	0	0	0	0	0	0	0	0	0	0	0	0	0	0	0	0	0	0	0	0	0	2.2	4	1.4	0	0
				0	0	0	0	0	0	0	0	0	0	0	0	0	0	0	0	0	0	0	0	0	0	0	0	0	0	0	0	0	0	0	0	0	0	0	0	0	0	0	0	0	0	0	0	0	0
				0	0	0	0	0	0	0	0	0	0	0	0	0	0	0	0	0	0	0	0	0	0	0	0	0	0	0	0	0	0	1.2	0.2	0	0	3	2.2	12.2	16.6	16.8	17.8	19.8	23.6	18.6	15.6	19	16.6
				0	0	0	0	0	0	0	0	0	0	0	0	0	0	0	0	0	0	0	0	0	0	0	0	0	0	0	0	0	0	0	0	0	2	6.8	15.2	12.6	14.4	10.8	12.8	17.4	15.6	11.8	13.8	16.4	12.4
				0	0	0	0	0	0	0	0	0	0	0	0	0	0	0	0	0	0	0	0	0	0	0	0	0	0	0	0	0	0	0	0	0	0	0	0	0	0	0	0	0	0	0	0	0	0
				0	0	0	0	0	0	0	0	0	0	0	0	0	0	0	0	0	0	0	0	0	0	0	0	0	0	0	0	0	0	0	0	0	0	0	0	0	0	0	0	0	0	0	0	0	0
				0	0	0	0	0	0	0	0	0	0	0	0	0	0	0	0	0	0	0	0	0	0	0	0	0	0	0	0	0	0	2.2	3.2	4.6	0	0	0	0.6	0.4	0	0	0	1	2.6	0	0	3
			4-10sessions	0	0	0	0	0	0	0	0	0	0	0	0	0	0	0	0	0	0	0	0	0	0	0	0	0	0	0	0	0	0	0	4.4	14.4	10.6	9.8	4.4	3.8	6.4	8	8.6	9.8	6.2	14.4	15.2	14	9
				0	0	0	0	0	0	0	0	0	0	0	0	0	0	0	0	0	0	0	0	0	0	0	0	0	0	0	0	0	0	0	0	6.2	8.4	3.2	0.6	4	3.8	2.4	0	2.6	4	7	10.6	6.4	2
				0	0	0	0	0	0	0	0	0	0	0	0	0	0	0	0	0	0	0	0	0	0	0	0	0	0	0	0	0	0	0.6	3.8	7.6	5.6	7	5.8	3.2	4.6	11.6	5.6	10	8.8	6.6	8.4	7	9.2
				0	0	0	0	0	0	0	0	0	0	0	0	0	0	0	0	0	0	0	0	0	0	0	0	0	0	0	0	0	0	0	0.6	0	0	0.8	1	0	2.8	3.4	5.4	5.6	2.2	3.8	0	6	4.8
				0	0	0	0	0	0	0	0	0	0	0	0	0	0	0	0	0	0	0	0	0	0	0	0	0	0	0	0	0	0	0	0	1.6	4.2	1.8	4.2	3.2	0	3.6	10.2	8.8	9.2	4.2	4.6	5.6	9.6
				0	0	0	0	0	0	0	0	0	0	0	0	0	0	0	0	0	0	0	0	0	0	0	0	0	0	0	0	0	0	0	3	3	2.2	12	16.2	27.4	27	28.2	31.6	35	36.4	31.2	26.4	16.8	10
				0	0	0	0	0	0	0	0	0	0	0	0	0	0	0	0	0	0	0	0	0	0	0	0	0	0	0	0	0	0	1	2.2	5.2	8.6	2.2	5	5.4	5	13.8	16	15.2	10.6	9.2	17	8.6	8.8
				0	0	0	0	0	0	0	0	0	0	0	0	0	0	0	0	0	0	0	0	0	0	0	0	0	0	0	0	0	0	0	2.6	2.2	4	2.6	4.4	5.2	6.8	5.6	7.2	10	8	4	3.6	4	7.2
				0	0	0	0	0	0	0	0	0	0	0	0	0	0	0	0	0	0	0	0	0	0	0	0	0	0	0	0	0	0	1.8	7.8	1.6	0.6	3	4.4	2.8	3	1.8	3	8.4	10.6	8.4	5.2	5	8.6
				0	0	0	0	0	0	0	0	0	0	0	0	0	0	0	0	0	0	0	0	0	0	0	0	0	0	0	0	0	0	0	5	9	14.2	9.2	7.8	6	1.6	0	4.8	3.8	2.4	1	1.2	0	4.2
				0	0	0	0	0	0	0	0	0	0	0	0	0	0	0	0	0	0	0	0	0	0	0	0	0	0	0	0	0	0	2.8	2.2	1	0	0	0	0	0	1.6	3.2	5.4	3.8	0.8	2.4	0.8	4.2
				0	0	0	0	0	0	0	0	0	0	0	0	0	0	0	0	0	0	0	0	0	0	0	0	0	0	0	0	0	0	0	0	0	0	0	0	0	0	0	0	0	0	0	1.2	0	4.2
				0	0	0	0	0	0	0	0	0	0	0	0	0	0	0	0	0	0	0	0	0	0	0	0	0	0	0	0	0	0	0	0	0	0	0	0	0	0	0	0	0	0	1.4	0	3.2	3.8
				0	0	0	0	0	0	0	0	0	0	0	0	0	0	0	0	0	0	0	0	0	0	0	0	0	0	0	0	0	0	0	0.6	1	0	0.4	0	0	0	0	0	0	0	0	0	0	0
				0	0	0	0	0	0	0	0	0	0	0	0	0	0	0	0	0	0	0	0	0	0	0	0	0	0	0	0	0	0	1.2	10.8	9.6	4.4	1.8	0	0	3.8	4	6.8	10	3.4	0	0	1.2	2.8
				0	0	0	0	0	0	0	0	0	0	0	0	0	0	0	0	0	0	0	0	0	0	0	0	0	0	0	0	0	0	0	3.4	4	3.8	1.8	0	0	0	0	0	4.8	12.8	15.8	21.6	30	30.6
				0	0	0	0	0	0	0	0	0	0	0	0	0	0	0	0	0	0	0	0	0	0	0	0	0	0	0	0	0	0	2.8	15.4	17	12	13.6	8.6	8	7.6	5.2	11	23.4	26	29.6	26.4	31.4	40.2
				0	0	0	0	0	0	0	0	0	0	0	0	0	0	0	0	0	0	0	0	0	0	0	0	0	0	0	0	0	0	3	25.8	20.8	14.4	9.6	7	7	3.8	4	6.4	8	12.4	16.6	22.2	25.2	22.2
				0	0	0	0	0	0	0	0	0	0	0	0	0	0	0	0	0	0	0	0	0	0	0	0	0	0	0	0	0	0	1.4	15.2	13	11.6	13.4	14.6	22	19.4	15.2	16.6	16.8	30	27	37.4	41.8	34.4
				0	0	0	0	0	0	0	0	0	0	0	0	0	0	0	0	0	0	0	0	0	0	0	0	0	0	0	0	0	0	1	6.8	8	6.8	11.4	11.8	12.4	14.4	19	23.2	21	16.6	24.2	36.6	37.8	36.6
				0	0	0	0	0	0	0	0	0	0	0	0	0	0	0	0	0	0	0	0	0	0	0	0	0	0	0	0	0	0	0	9.8	12	11.8	9.6	6	8.2	11.6	10.6	7	4	6	6	8.8	12.8	15.4
				0	0	0	0	0	0	0	0	0	0	0	0	0	0	0	0	0	0	0	0	0	0	0	0	0	0	0	0	0	0	0.6	0.8	1.2	0	0	0	0	0	0	0	0	0	1.6	3.8	2.6	0
				0	0	0	0	0	0	0	0	0	0	0	0	0	0	0	0	0	0	0	0	0	0	0	0	0	0	0	0	0	0	1.8	0	0	0	0	0	0	0	0	2	2.8	3	3.8	2.4	4	4
				0	0	0	0	0	0	0	0	0	0	0	0	0	0	0	0	0	0	0	0	0	0	0	0	0	0	0	0	0	0	0	0	0	0	0	0.4	4	2.4	0	0	0	0	0	0	0	0
				0	0	0	0	0	0	0	0	0	0	0	0	0	0	0	0	0	0	0	0	0	0	0	0	0	0	0	0	0	0	2	2.8	0.6	0	0	0	0	0	0	0	0	2.6	4.6	2.2	0	0
				0	0	0	0	0	0	0	0	0	0	0	0	0	0	0	0	0	0	0	0	0	0	0	0	0	0	0	0	0	0	2.4	7.4	0.4	0	0	0	0	0	0	0	0	0	0	0	0	0
				0	0	0	0	0	0	0	0	0	0	0	0	0	0	0	0	0	0	0	0	0	0	0	0	0	0	0	0	0	0	0	0	0	0	0	0	0	0	0	0	0	0	0	0	0	0
				0	0	0	0	0	0	0	0	0	0	0	0	0	0	0	0	0	0	0	0	0	0	0	0	0	0	0	0	0	0	0.4	1.6	0	0	0	0	0	0	0	0	0	1.6	3.8	1.8	4	0.6
				0	0	0	0	0	0	0	0	0	0	0	0	0	0	0	0	0	0	0	0	0	0	0	0	0	0	0	0	0	0	0	0	0	0	0	0	0	0	0	0	0	0	0	0	0	0
				0	0	0	0	0	0	0	0	0	0	0	0	0	0	0	0	0	0	0	0	0	0	0	0	0	0	0	0	0	0	0	0.4	0	0	0	0	0	0	0	0	0	0	0	0	0	0
				0	0	0	0	0	0	0	0	0	0	0	0	0	0	0	0	0	0	0	0	0	0	0	0	0	0	0	0	0	0	0	0	0	0	0	0	0	0	0	0	0	0	0	0	0	0
				0	0	0	0	0	0	0	0	0	0	0	0	0	0	0	0	0	0	0	0	0	0	0	0	0	0	0	0	0	0	0	0	0	0	0	0	0	0	0	0	0	0	0	0	0	0
				0	0	0	0	0	0	0	0	0	0	0	0	0	0	0	0	0	0	0	0	0	0	0	0	0	0	0	0	0	0	0	0	0	0	0	0	0	0	0	0	0	0	0	0	0	0
				0	0	0	0	0	0	0	0	0	0	0	0	0	0	0	0	0	0	0	0	0	0	0	0	0	0	0	0	0	0	0	0	0	0	0	0	0	0	0	0	0	0	0	0	0	0
				0	0	0	0	0	0	0	0	0	0	0	0	0	0	0	0	0	0	0	0	0	0	0	0	0	0	0	0	0	0	0	0	0	0	0	0	1.8	0	0	0	0	0	3.4	2.6	0	0
				0	0	0	0	0	0	0	0	0	0	0	0	0	0	0	0	0	0	0	0	0	0	0	0	0	0	0	0	0	0	0	0	0	0	0	0	0	0	0	0	0	0	0	0	0	0
				0	0	0	0	0	0	0	0	0	0	0	0	0	0	0	0	0	0	0	0	0	0	0	0	0	0	0	0	0	0	1.6	2	0	0	0	0	0	0	0	0	0	0	0	0	0	0
				0	0	0	0	0	0	0	0	0	0	0	0	0	0	0	0	0	0	0	0	0	0	0	0	0	0	0	0	0	0	0	0	0	0	0	0	0	0	0	0	0	0	0	0	0	0
				0	0	0	0	0	0	0	0	0	0	0	0	0	0	0	0	0	0	0	0	0	0	0	0	0	0	0	0	0	0	0	0.8	0	0	0	0	0	0	0	0	0	0	2.6	5.4	4.8	3
				0	0	0	0	0	0	0	0	0	0	0	0	0	0	0	0	0	0	0	0	0	0	0	0	0	0	0	0	0	0	0	3.8	5	0.6	3.4	0	0	0	0	0	0	0	0	0	0	0
				0	0	0	0	0	0	0	0	0	0	0	0	0	0	0	0	0	0	0	0	0	0	0	0	0	0	0	0	0	0	0	0	0	0	0	0	0	0	0	0	0	0	0.4	0.4	0	0
				0	0	0	0	0	0	0	0	0	0	0	0	0	0	0	0	0	0	0	0	0	0	0	0	0	0	0	0	0	0	0	0	0	0	0	0	0	0	0	0	0	0	0	1	0	0
				0	0	0	0	0	0	0	0	0	0	0	0	0	0	0	0	0	0	0	0	0	0	0	0	0	0	0	0	0	0	0	0	0	0	0	0	0	0	0	0	0	0	0	2.2	5.2	0
				0	0	0	0	0	0	0	0	0	0	0	0	0	0	0	0	0	0	0	0	0	0	0	0	0	0	0	0	0	0	0.4	0	0	1.4	0.2	0.6	4.6	1.4	3.6	3	0	0	0	2	0	0
				0	0	0	0	0	0	0	0	0	0	0	0	0	0	0	0	0	0	0	0	0	0	0	0	0	0	0	0	0	0	0	0	0	0	0	0	0	0	0	0	0	0	0	0	0	0
				0	0	0	0	0	0	0	0	0	0	0	0	0	0	0	0	0	1.8	4	2.4	0	0	0	0	0	0	0	0	0	0	6.2	0	6.2	0.6	5.2	16	13.2	7.8	16.6	9.8	6.4	14.8	13	10.6	13	10.8
				0	0	0	0	0	0	0	0	0	0	0	0	0	0	0	0	0	0	0	0	0	0	0	0	0	3.8	4	1.8	0	0	1	3.6	2.4	2.6	8.6	13.2	19.4	16.6	15.8	22.2	33.6	30.6	27	27.8	24.2	23.8
				0	0	0	0	0	0	0	0	0	0	0	0	0	0	0	0	0	0	0	0	0	0	0	0	0	0	0	0	0	0	1	1.4	2.2	3.4	0.8	9.2	6.8	11	12.6	17	12.4	5.4	7.8	11.8	17.4	18.2
				0	0	0	0	0	0	0	0	0	0	0	0	0	0	0	0	0	0	0	0	0	0	0	0	0	0	0	0	0	0	1	2.6	1.4	0	0.6	6	4	0.6	11.8	13.2	8.6	9.4	11.2	11	15.8	17.4
				0	0	0	0	0	0	0	0	0	0	0	0	0	0	0	0	0	0	0	0	0	0	0	0	0	0	0	0	0	0	3	0	2.6	2.6	0	3.6	4.4	5.6	8	8.8	12.4	16	11	11.6	10.4	9.4
				0	0	0	0	0	0	0	0	0	0	0	0	0	0	0	0	0	0	0	0	0	0	0	0	0	0	0	0	0	0	2.8	0.8	0	0	1	2.4	1	4	10.8	7.6	10	12.4	15.6	15.6	23.6	19.8
				0	0	0	0	0	0	0	0	0	0	0	0	0	0	0	0	0	0	0	0	0	0	0	0	0	0	0	0	0	0	1.4	1.4	0	3.8	2.8	2.4	4.2	5.6	19.4	16.2	21	23.8	19.4	25	24.4	29.4
				0	0	0	0	0	0	0	0	0	0	0	0	0	0	0	0	0	0	0	0	0	0	0	0	0	0	0	0	0	0	0	0	0	0	0	0	0	0	0	0	0	0	0	0	0	0
				0	0	0	0	0	0	0	0	0	0	0	0	0	0	0	0	0	0	0	0	0	0	0	0	0	0	0	0	0	0	0	0	0	0	0	0	0	0	0	0	0	0	0	0	0	0
				0	0	0	0	0	0	0	0	0	0	0	0	0	0	0	0	0	0	0	0	0	0	0	0	0	0	0	0	0	0	0	0	0	0	0	0	0	0	0	0	0	0	0	0	0	0
				0	0	0	0	0	0	0	0	0	0	0	0	0	0	0	0	0	0	0	0	0	0	0	0	0	0	0	0	0	0	0	0	0	0	0	0	0	0	0	0	0	0	0	0	0	0
				0	0	0	0	0	0	0	0	0	0	0	0	0	0	0	0	0	0	0	0	0	0	0	0	0	0	0	0	0	0	0	0	0	0	0	0	0	0	0	0	0	0	0	0	0	0
				0	0	0	0	0	0	0	0	0	0	0	0	0	0	0	0	0	0	0	0	0	0	0	0	0	0	0	0	0	0	0	0	0	0	0	0	0	0	0	0	0	0	0	0	0	0
				0	0	0	0	0	0	0	0	0	0	0	0	0	0	0	0	0	0	0	0	0	0	0	0	0	0	0	0	0	0	1	0.8	0	0	0	0	0	0	0	0	0	0	0	0	0	0
				0	0	0	0	0	0	0	0	0	0	0	0	0	0	0	0	0	0	0	0	0	0	0	0	0	0	0	0	0	0	0	0	0	0	0	0	0	0	0.4	4	1.6	3.6	3.4	0	3.4	0.6
				0	0	0	0	0	0	0	0	0	0	0	0	0	0	0	0	0	0	0	0	0	0	0	0	0	0	0	0	0	0	0	0	0	0	0	0	0	0	0	0	0	0	0	0	0	0
				0	0	0	0	0	0	0	0	0	0	0	0	0	0	0	0	0	0	0	0	0	0	0	0	0	0	0	0	0	0	1.4	2	0	0	0	0	0	0	0	0	0	0	0	0	0	0
				0	0	0	0	0	0	0	0	0	0	0	0	0	0	0	0	0	0	0	0	0	0	0	0	0	0	0	0	0	0	0	0	0	0	0	0	0	0	0	0	0	0	0	0	0	0
				0	0	0	0	0	0	0	0	0	0	0	0	0	0	0	0	0	0	0	0	0	0	0	0	0	0	0	0	0	0	0.2	7.4	7.6	2	0	0	0	0	0	0	0	0	0	0	0	0
				0	0	0	0	0	0	0	0	0	0	0	0	0	0	0	0	0	0	0	0	0	0	0	0	0	0	0	0	0	0	0	3.6	3.2	0	0	0	0	0	0	0	0	0	0	0	0	0
				0	0	0	0	0	0	0	0	0	0	0	0	0	0	0	0	0	0	0	0	0	0	0	0	0	0	0	0	0	0	6.2	21.6	6.6	0	0	0	0	1.4	0	0	0	0	0	0	0	0
				0	0	0	0	0	0	0	0	0	0	0	0	0	0	0	0	0	0	0	0	0	0	0	0	0	0	0	0	0	0	0	0	0	9.2	25.6	28.4	30.8	28.4	25.6	27.8	27.8	32	47.8	49.4	43.2	32.2
				0	0	0	0	0	0	0	0	0	0	0	0	0	0	0	0	0	0	0	0	0	0	0	0	0	0	0	0	0	0	0	0	4.2	5.8	0	1	6.4	7	12.8	30.2	34.4	34.6	14.4	7	4.4	8
				0	0	0	0	0	0	0	0	0	0	0	0	0	0	0	0	0	0	0	0	0	0	0	0	0	0	0	0	0	0	0	0	0	7.6	12.6	17	10.2	18.6	17.8	14.4	18.2	27.6	17	16.2	23	21.2
				0	0	0	0	0	0	0	0	0	0	0	0	0	0	0	0	0	0	0	0	0	0	0	0	0	0	0	0	0	0	0	0	7.6	20	27.2	43.8	32.4	35.2	23.6	20.6	19.8	23.2	17.2	10.6	15.4	13.4
				0	0	0	0	0	0	0	0	0	0	0	0	0	0	0	0	0	0	0	0	0	0	0	0	0	0	0	0	0	0	0.8	1.4	19.8	14.8	8	2.6	7.2	9.6	8.4	12.8	19.2	13.2	13.6	14.4	15.4	16
				0	0	0	0	0	0	0	0	0	0	0	0	0	0	0	0	0	0	0	0	0	0	0	0	0	0	0	0	0	0	0.8	0.6	4	9.8	13.6	7	20	20	30	29.6	29.4	28.8	31.2	22.2	17.6	20
				0	0	0	0	0	0	0	0	0	0	0	0	0	0	0	0	0	0	0	0	0	0	0	0	0	0	0	0	0	0	1.4	2.6	15.2	23.2	28.4	22.8	39.4	33.8	31	27.6	24.4	24.4	17.6	20.2	14.4	9.4
				0	0	0	0	0	0	0	0	0	0	0	0	0	0	0	0	0	0	0	0	0	0	0	0	0	0	0	0	0	0	5	7.4	4.4	4	6.4	9.6	6.4	14.4	8.2	5.6	5.4	9.8	20.6	20.4	20.6	22.4
				0	0	0	0	0	0	0	0	0	0	0	0	0	0	0	0	0	0	0	0	0	0	0	0	0	0	0	0	0	0	3.2	3	2.6	6.6	12.8	6.4	14	7	6.4	6.8	17.4	13.2	11.8	8	11	13.4
				0	0	0	0	0	0	0	0	0	0	0	0	0	0	0	0	0	0	0	0	0	0	0	0	0	0	0	0	0	0	4.8	19.8	21.2	10.4	5	13.8	25.6	17.6	22.4	15.2	10.8	20.8	21.2	27.6	22	9.4
				0	0	0	0	0	0	0	0	0	0	0	0	0	0	0	0	0	0	0	0	0	0	0	0	0	0	0	0	0	0	10.6	14.8	14	13	19	12	19.2	14.2	15.8	14.2	14.4	21.2	22.4	32.4	24.8	26.4
				0	0	0	0	0	0	0	0	0	0	0	0	0	0	0	0	0	0	0	0	0	0	0	0	0	0	0	0	0	0	8.6	9.8	17	28.6	26.8	34	47.8	30.2	34.4	34.2	38	35.4	45.8	45	49.4	33.6
				0	0	0	0	0	0	0	0	0	0	0	0	0	0	0	0	0	0	0	0	0	0	0	0	0	0	0	0	0	0	9.8	16	18	17.2	16.8	22.2	22.6	22.2	32.4	40.6	39.6	30	31.6	35.6	26.4	28.8
				0	0	0	0	0	0	0	0	0	0	0	0	0	0	0	0	0	0	0	0	0	0	0	0	0	0	0	0	0	0	5	16	9.4	5.4	12.6	40	28.6	39.4	46.2	51	29.2	38.6	39.8	40.2	46.8	35.8
		mean	1-3sessions	0.0645161	0	0	0.109677	0.0580645	0	0	0	0	0	0	0	0	0	0	0	0	0	0	0	0	0	0.00645161	0.0903226	0	0.0709677	0.0709677	0	0.0774194	0.135484	0.774194	0.703226	0.96129	1.60645	2.13548	2.56774	2.23226	2.8129	3.12903	3.40645	3.93548	4.09677	4.47097	4.88387	5.50323	5.30323
		mean	4-10sessions	0	0	0	0	0	0	0	0	0	0	0	0	0	0	0	0	0	0.0225	0.05	0.03	0	0	0	0	0	0.0475	0.05	0.0225	0	0	1.25	3.445	3.925	3.9475	4.3825	5.2025	6.1575	5.945	6.9	7.5125	7.9925	8.5675	8.6475	9.19	9.31	8.685
[truncated: 73 more columns]

## Sheet: Fig 3d
		60 iti
		time	-16.2	-16	-15.8	-15.6	-15.4	-15.2	-15	-14.8	-14.6	-14.4	-14.2	-14	-13.8	-13.6	-13.4	-13.2	-13	-12.8	-12.6	-12.4	-12.2	-12	-11.8	-11.6	-11.4	-11.2	-11	-10.8	-10.6	-10.4	-10.2	-10	-9.8	-9.6	-9.4	-9.2	-9	-8.8	-8.6	-8.4	-8.2	-8	-7.8	-7.6	-7.4	-7.2	-7
		1-3sessions	0	0	0	0	0	0	0	0	0	0	0	0	0	0	0	0	0	0	0	0	0	0	0	0	0	0	0	0	0	0	0	0	0	0	0	0	0	0	0	0	0	0	0	1.2	0	0	0
			0	0	0	0	0	0	0	0	0	0	0	0	0	0	0	0	0	0	0	0	0	0	0	0	0	0	0	0	0	0	0	0	0	0	0	0	0	0	0	0	0	0	0	0	0	0	0
			0	0	0	0	0	0	0	0	0	0	0	0	0	0	0	0	0	0	0	0	0	0	0	0	0	0	0	0	0	0	0	0	0	0	0	0	0	0	0	0	0	0	0	0	0	0	0
			0	0	0	0	0	0	0	0	0	0	0	0	0	0	0	0	0	0	0	0	0	0	0	0	0	0	0	0	0	0	0	0	0	0	0	0	0	0	0	0	0	0	0	0	0	0	0
			0	0	0	0	0	0	0	0	0	0	0	0	0	0	0	0	0	0	0	0	0	0	0	0	0	0	0	0	0	0	0	0	0	0	0	0	0	0	0	0	0	0	0	0	0	0	0
			0	0	0	0	0	0	0	0	0	0	0	0	0	0	0	0	0	0	0	0	0	0	0	0	0	0	0	0	0	0	0	0	0	0	0	0	0	0	0	0	0	0	0	0	0	0	0
			0	0	0	0	0	0	0	0	0	0	0	0	0	0	0	0	0	0	0	0	0	0	0	0	0	0	0	0	0	0	0	0	0	0	0	0	0	0	0	0	0	0	0	0	0	0	0
			0	0	0	0	0	0	0	0	0	0	0	0	0	0	0	0	0	0	0	0	0	0	0	0	0	0	0	0	0	0	0	0	0	0	0	0	0	0	0	0	0	0	0	0	0	0	0
			0	0	0	0	0	0	0	0	0	0	0	0	0	0	0	0	0	0	0	0	0	0	0	0	0	0	0	0	0	0	0	0	0	0	0	0	0	0	0	0	0	0	0	0	0	0	0
			0	0	0	0	0	0	0	0	0	0	0	0	0	0	0	0	0	0	0	0	0	0	0	0	0	0	0	0	0	0	0	0	0	0	0	0	0	0	0	0	0	0	1.4	4.4	7.2	5.6	7.2
			0	0	0	0	0	0	0	0	0	0	0	0	0	0	0	0	0	0	0	0	0	0	0	0	0	0	0	0	0	0	0	0	0	0	0	0	0	0	0	0	0	0	0	8.8	7.8	10.8	12
			0	0	0	0	0	0	0	0	0	0	0	0	0	0	0	0	0	0	0	0	0	0	0	0	0	0	0	0	0	0	0	0	0	0	0	0	0	0	0	0	0	0	2.8	16.4	8.4	9.2	17.8
			0	0	0	0	0	0	0	0	0	0	0	0	0	0	0	0	0	0	0	0	0	0	0	0	0	0	0	0	0	0	0	0	0	0	0	0	0	0	0	0	0	0	0.2	1	0	0	0
			0	0	0	0	0	0	0	0	0	0	0	0	0	0	0	0	0	0	0	0	0	0	0	0	0	0	0	0	0	0	0	0	0	0	0	0	0	0	0	0	0	0	0.2	1	0	0	0
			0	0	0	0	0	0	0	0	0	0	0	0	0	0	0	0	0	0	0	0	0	0	0	0	0	0	0	0	0	0	0	0	0	0	0	0	0	0	0	0	0	0	0	0	0	0	0
		4-10sessions	0	0	0	0	0	0	0	0	0	0	0	0	0	0	0	0	0	0	0	0	0	0	0	0	0	0	0	0	0	0	0	0	0	0	0	0	0	0	0	0	0	0	0	0	0	0	0
			0	0	0	0	0	0	0	0	0	0	0	0	0	0	0	0	0	0	0	0	0	0	0	0	0	0	0	0	0	0	0	0	0	0	0	0	0	0	0	0	0	0	0	0	0	0	0
			0	0	0	0	0	0	0	0	0	0	0	0	0	0	0	0	0	0	0	0	0	0	0	0	0	0	0	0	0	0	0	0	0	0	0	0	0	0	0	0	0	0	0	0	0	0	0
			0	0	0	0	0	0	0	0	0	0	0	0	0	0	0	0	0	0	0	0	0	0	0	0	0	0	0	0	0	0	0	0	0	0	0	0	0	0	0	0	0	0	0	0	0	0	0
			0	0	0	0	0	0	0	0	0	0	0	0	0	0	0	0	0	0	0	0	0	0	0	0	0	0	0	0	0	0	0	0	0	0	0	0	0	0	0	0	0	0	0	0.6	0.6	0	0
			0	0	0	0	0	0	0	0	0	0	0	0	0	0	0	0	0	0	0	0	0	0	0	0	0	0	0	0	0	0	0	0	0	0	0	0	0	0	0	0	0	0	0	0	0	0	0
			0	0	0	0	0	0	0	0	0	0	0	0	0	0	0	0	0	0	0	0	0	0	0	0	0	0	0	0	0	0	0	0	0	0	0	0	0	0	0	0	0	0	0	0	0	0	0
			0	0	0	0	0	0	0	0	0	0	0	0	0	0	0	0	0	0	0	0	0	0	0	0	0	0	0	0	0	0	0	0	0	0	0	0	0	0	0	0	0	0	0	0	0	0	0
			0	0	0	0	0	0	0	0	0	0	0	0	0	0	0	0	0	0	0	0	0	0	0	0	0	0	0	0	0	0	0	0	0	0	0	0	0	0	0	0	0	0	0	0	0	0	0
			0	0	0	0	0	0	0	0	0	0	0	0	0	0	0	0	0	0	0	0	0	0	0	0	0	0	0	0	0	0	0	0	0	0	0	0	0	0	0	0	0	0	0	0	0	0	0
			0	0	0	0	0	0	0	0	0	0	0	0	0	0	0	0	0	0	0	0	0	0	0	0	0	0	0	0	0	0	0	0	0	0	0	0	0	0	0	0	0	0	0.4	4.2	3.8	4.2	3.8
			0	0	0	0	0	0	0	0	0	0	0	0	0	0	0	0	0	0	0	0	0	0	0	0	0	0	0	0	0	0	0	0	0	0	0	0	0	0	0	0	0	0	0	0	0	0	0
			0	0	0	0	0	0	0	0	0	0	0	0	0	0	0	0	0	0	0	0	0	0	0	0	0	0	0	0	0	0	0	0	0	0	0	0	0	0	0	0	0	0	0	0	1	3.2	6.2
			0	0	0	0	0	0	0	0	0	0	0	0	0	0	0	0	0	0	0	0	0	0	0	0	0	0	0	0	0	0	0	0	0	0	0	0	0	0	0	0	0	0	0	1.4	6.4	4.6	7.8
			0	0	0	0	0	0	0	0	0	0	0	0	0	0	0	0	0	0	0	0	0	0	0	0	0	0	0	0	0	0	0	0	0	0	0	0	0	0	0	0	0	0	0	4.2	6.6	5.2	2
			0	0	0	0	0	0	0	0	0	0	0	0	0	0	0	0	0	0	0	0	0	0	0	0	0	0	0	0	0	0	0	0	0	0	0	0	0	0	0	0	0	0	0	0	0	0	0
			0	0	0	0	0	0	0	0	0	0	0	0	0	0	0	0	0	0	0	0	0	0	0	0	0	0	0	0	0	0	0	0	0	0	0	0	0	0	0	0	0	0	0	0	0	0	0
			0	0	0	0	0	0	0	0	0	0	0	0	0	0	0	0	0	0	0	0	0	0	0	0	0	0	0	0	0	0	0	0	0	0	0	0	0	0	0	0	0	0	0	0	0	0	0
			0	0	0	0	0	0	0	0	0	0	0	0	0	0	0	0	0	0	0	0	0	0	0	0	0	0	0	0	0	0	0	0	0	0	0	0	0	0	0	0	0	0	0	0	0	0	0
			0	0	0	0	0	0	0	0	0	0	0	0	0	0	0	0	0	0	0	0	0	0	0	0	0	0	0	0	0	0	0	0	0	0	0	0	0	0	0	0	0	0	0	1.6	3.8	1.6	0
			0	0	0	0	0	0	0	0	0	0	0	0	0	0	0	0	0	0	0	0	0	0	0	0	0	0	0	0	0	0	0	0	0	0	0	0	0	0	0	0	0	0	1.6	6	4	3.8	0.6
			0	0	0	0	0	0	0	0	0	0	0	0	0	0	0	0	0	0	0	0	0	0	0	0	0	0	0	0	0	0	0	0	0	0	0	0	0	0	0	0	0	0	0	0	0	0	0
			0	0	0	0	0	0	0	0	0	0	0	0	0	0	0	0	0	0	0	0	0	0	0	0	0	0	0	0	0	0	0	0	0	0	0	0	0	0	0	0	0	0	0	0	0	0	2
			0	0	0	0	0	0	0	0	0	0	0	0	0	0	0	0	0	0	0	0	0	0	0	0	0	0	0	0	0	0	0	0	0	0	0	0	0	0	0	0	0	0	0	0	0	0	2.2
			0	0	0	0	0	0	0	0	0	0	0	0	0	0	0	0	0	0	0	0	0	0	0	0	0	0	0	0	0	0	0	0	0	0	0	0	0	0	0	0	0	0	0	0	0	0	2.4
			0	0	0	0	0	0	0	0	0	0	0	0	0	0	0	0	0	0	0	0	0	0	0	0	0	0	0	0	0	0	0	0	0	0	0	0	0	0	0	0	0	0	0	0	0	0	0
			0	0	0	0	0	0	0	0	0	0	0	0	0	0	0	0	0	0	0	0	0	0	0	0	0	0	0	0	0	0	0	0	0	0	0	0	0	0	0	0	0	0	0	0.4	0	0	0
			0	0	0	0	0	0	0	0	0	0	0	0	0	0	0	0	0	0	0	0	0	0	0	0	0	0	0	0	0	0	0	0	0	0	0	0	0	0	0	0	0	0	0	0	0	0	0.2
			0	0	0	0	0	0	0	0	0	0	0	0	0	0	0	0	0	0	0	0	0	0	0	0	0	0	0	0	0	0	0	0	0	0	0	0	0	0	0	0	0	0	0	0	0	0	0
			0	0	0	0	0	0	0	0	0	0	0	0	0	0	0	0	0	0	0	0	0	0	0	0	0	0	0	0	0	0	0	0	0	0	0	0	0	0	0	0	0	0	0.6	0	0	0	0
			0	0	0	0	0	0	0	0	0	0	0	0	0	0	0	0	0	0	0	0	0	0	0	0	0	0	0	0	0	0	0	0	0	0	0	0	0	0	0	0	0	0	0	0	3	4.2	4.2
			0	0	0	0	0	0	0	0	0	0	0	0	0	0	0	0	0	0	0	0	0	0	0	0	0	0	0	0	0	0	0	0	0	0	0	0	0	0	0	0	0	0	0	2.4	2.4	1.6	1
			0	0	0	0	0	0	0	0	0	0	0	0	0	0	0	0	0	0	0	0	0	0	0	0	0	0	0	0	0	0	0	0	0	0	0	0	0	0	0	0	0	0	0	2.8	5.4	8	7.8
			0	0	0	0	0	0	0	0	0	0	0	0	0	0	0	0	0	0	0	0	0	0	0	0	0	0	0	0	0	0	0	0	0	0	0	0	0	0	0	0	0	0	3.4	23	26.2	28.6	23.8
			0	0	0	0	0	0	0	0	0	0	0	0	0	0	0	0	0	0	0	0	0	0	0	0	0	0	0	0	0	0	0	0	0	0	0	0	0	0	0	0	0	0	1.2	17.4	16.4	19	11.8
			0	0	0	0	0	0	0	0	0	0	0	0	0	0	0	0	0	0	0	0	0	0	0	0	0	0	0	0	0	0	0	0	0	0	0	0	0	0	0	0	0	0	3.2	10.6	15.4	11	7.8
			0	0	0	0	0	0	0	0	0	0	0	0	0	0	0	0	0	0	0	0	0	0	0	0	0	0	0	0	0	0	0	0	0	0	0	0	0	0	0	0	0	0	0.8	1.2	6.6	8.2	7.8
			0	0	0	0	0	0	0	0	0	0	0	0	0	0	0	0	0	0	0	0	0	0	0	0	0	0	0	0	0	0	0	0	0	0	0	0	0	0	0	0	0	0	3.2	11.4	7.6	12.2	6
			0	0	0	0	0	0	0	0	0	0	0	0	0	0	0	0	0	0	0	0	0	0	0	0	0	0	0	0	0	0	0	0	0	0	0	0	0	0	0	0	0	0	0	0	0	0	0
			0	0	0	0	0	0	0	0	0	0	0	0	0	0	0	0	0	0	0	0	0	0	0	0	0	0	0	0	0	0	0	0	0	0	0	0	0	0	0	0	0	0	0	0	0	0	0
			0	0	0	0	0	0	0	0	0	0	0	0	0	0	0	0	0	0	0	0	0	0	0	0	0	0	0	0	0	0	0	0	0	0	0	0	0	0	0	0	0	0	0	0	0	0	0
			0	0	0	0	0	0	0	0	0	0	0	0	0	0	0	0	0	0	0	0	0	0	0	0	0	0	0	0	0	0	0	0	0	0	0	0	0	0	0	0	0	0	0	0	0	0	0
			0	0	0	0	0	0	0	0	0	0	0	0	0	0	0	0	0	0	0	0	0	0	0	0	0	0	0	0	0	0	0	0	0	0	0	0	0	0	0	0	0	0	0	0	0	0	0
			0	0	0	0	0	0	0	0	0	0	0	0	0	0	0	0	0	0	0	0	0	0	0	0	0	0	0	0	0	0	0	0	0	0	0	0	0	0	0	0	0	0	0	0	0	0	0
			0	0	0	0	0	0	0	0	0	0	0	0	0	0	0	0	0	0	0	0	0	0	0	0	0	0	0	0	0	0	0	0	0	0	0	0	0	0	0	0	0	0	0	0	0	0	0
	mean	1-3sessions	0	0	0	0	0	0	0	0	0	0	0	0	0	0	0	0	0	0	0	0	0	0	0	0	0	0	0	0	0	0	0	0	0	0	0	0	0	0	0	0	0	0	0.306667	2.18667	1.56	1.70667	2.46667
	mean	4-10sessions	0	0	0	0	0	0	0	0	0	0	0	0	0	0	0	0	0	0	0	0	0	0	0	0	0	0	0	0	0	0	0	0	0	0	0	0	0	0	0	0	0	0	0.32	1.93778	2.42667	2.56444	2.16444
[truncated: 90 more columns]

## Sheet: Fig 3e
		120iti
		time	-11	-10.9	-10.8	-10.7	-10.6	-10.5	-10.4	-10.3	-10.2	-10.1	-10	-9.9	-9.8	-9.7	-9.6	-9.5	-9.4	-9.3	-9.2	-9.1	-9	-8.9	-8.8	-8.7	-8.6	-8.5	-8.4	-8.3	-8.2	-8.1	-8	-7.9	-7.8	-7.7	-7.6	-7.5	-7.4	-7.3	-7.2	-7.1	-7	-6.9	-6.8	-6.7	-6.6	-6.5	-6.4
		1-3sessions	-1.36347	-1.5239	-2.49298	-1.38595	-3.80203	-2.76536	-3.19061	-2.86921	-3.22183	-4.69443	-3.86336	-3.25698	-4.38551	-4.62309	-4.63812	-4.51256	-5.81914	-2.6729	-4.29108	-4.22403	-4.85538	-4.0936	-4.75749	-4.51299	-4.80265	-5.25509	-5.67543	-6.99704	-6.04586	-5.78936	-6.61106	-7.51727	-4.42409	0.0615359	5.14141	9.99255	10.9598	14.127	13.0547	15.2089	15.2513	14.8984	15.3187	15.3481	16.7882	17.1051	19.3219
			2.06556	2.31406	1.26333	0.422578	0.683226	0.828157	0.741396	2.15351	1.0606	0.391664	0.552266	2.15226	0.847997	0.602527	1.26023	1.03522	2.22553	2.88821	2.50428	3.10685	1.71478	3.35324	1.47879	3.64862	2.46129	2.70213	1.97517	3.03565	3.13801	4.38651	3.07499	4.62362	3.81902	6.07058	7.67638	9.78989	13.8955	15.4955	17.2197	17.3984	19.0947	18.7466	17.9524	19.1591	18.4435	21.9184	23.5221
			-2.9408	-2.3445	-1.9012	-2.32719	-2.42685	-0.84314	-0.775799	0.148068	-0.057189	0.210916	-0.233739	-0.377198	0.434354	-1.20232	-0.759816	-0.424212	-0.772205	-1.70285	-2.25246	-2.48749	-1.23391	-2.15916	-1.93809	-0.150264	-0.909895	-2.44833	0.0971104	0.321034	0.770596	1.58728	3.4229	2.22665	6.22786	13.6687	20.5109	24.7838	28.6632	32.3256	34.6309	34.1112	35.7378	35.3628	35.6448	34.72	34.5798	34.1998	35.1694
			-2.08659	-1.1238	0.0810465	-6.43072	-0.580382	-6.71149	-4.85147	-4.02617	-3.46817	-2.15522	-1.27324	-2.28348	-4.78715	-5.39696	-4.34269	-1.90608	-4.68404	-2.44171	-3.35266	-3.46458	-4.10659	-2.7411	-2.23966	-4.7906	-1.23121	-1.99857	-2.44569	0.0250296	0.949134	-1.20749	0.883656	3.92481	7.90575	9.31748	10.9088	14.5095	12.4321	12.238	10.8451	17.4319	12.1696	12.6103	12.2806	14.0677	18.9549	19.8963	23.806
			-10.8221	-12.3516	-14.2503	-14.6205	-14.7456	-13.8343	-14.4563	-14.9744	-12.1696	-11.3776	-14.6443	-12.1497	-12.8549	-12.652	-12.7901	-12.6564	-12.7852	-10.0683	-13.5013	-13.0703	-15.2484	-12.5248	-15.0418	-14.8616	-15.0412	-14.3104	-13.9372	-13.6383	-15.641	-14.7502	-16.6214	-15.6997	-1.52849	10.0336	13.7105	15.5012	15.2708	16.1759	12.0383	13.8405	10.7523	9.31456	10.7824	11.0758	14.4126	19.9126	20.96
			-5.78711	-5.40387	-5.77361	-6.18155	-7.45959	-5.38937	-6.93097	-7.4237	-9.16393	-7.95683	-6.95905	-7.85554	-7.0392	-8.87984	-9.03811	-8.15517	-8.87111	-9.38265	-8.40513	-6.70761	-7.30929	-9.12561	-7.60412	-6.9863	-7.72388	-6.9693	-7.60012	-8.1926	-8.31503	-7.69257	-10.4546	-7.36397	-3.26843	0.270215	3.63143	2.7437	2.87598	4.79201	7.31517	5.00616	5.81906	4.83089	6.12645	5.56774	8.66366	11.3728	10.7522
			-4.84939	-4.10578	-4.17726	-2.2645	-4.99845	-4.71438	-0.638226	-4.03614	-5.58941	-5.28447	-6.25802	-8.65471	-7.68937	-7.4583	-5.42564	-6.99026	-4.17704	-6.59355	-8.21064	-6.0623	-6.64959	-7.26733	-8.05712	-8.22611	-6.07447	-4.90514	-7.85562	-7.30451	-6.48173	-5.24467	0.801985	-6.49018	-8.60814	5.66514	13.9831	11.0402	12.1072	15.0361	15.5325	12.7944	9.12212	7.75077	3.22663	2.4654	2.36374	1.90477	3.05378
			-6.25989	-8.96341	-6.02755	-8.1084	-8.03818	-10.6086	-8.50854	-8.25595	-9.99098	-9.50402	-9.32942	-8.37161	-10.517	-10.8907	-8.83631	-8.49853	-8.32009	-8.25904	-8.64355	-7.46189	-7.90553	-8.33988	-9.35803	-8.4943	-7.37631	-9.15564	-9.03189	-11.1348	-9.99669	-9.71771	-9.46108	-9.00783	-2.31061	4.33536	6.71304	6.22684	7.62713	6.27484	4.9414	5.39365	6.27678	0.688779	2.73227	0.566389	0.266936	1.75456	1.54558
			-2.04263	-2.43364	-3.55426	-3.02207	-3.43177	-3.44319	-1.82052	-3.0274	-2.94002	-2.70596	-3.62547	-3.69682	-4.43424	-2.56179	-2.96462	-2.87328	-5.03648	-3.1093	-3.03832	-3.40454	-3.11982	-3.3559	-3.88041	-5.12504	-4.41661	-4.5258	-3.58708	-3.74895	-4.45736	-5.23671	-6.41232	-2.22588	-0.613364	1.89935	6.3014	6.42646	5.77624	5.39724	5.99616	5.92244	4.00459	4.32881	3.78635	2.26436	3.68617	2.72311	2.97742
			-1.67327	-3.8653	-3.80168	-2.3519	-1.42444	-1.88252	-3.1525	-5.10015	-1.68106	-4.54439	-4.77883	-3.58922	-1.2245	-2.9558	-1.96371	-5.59923	-1.54511	-2.5854	-1.6887	-3.88041	-3.64629	-0.375935	-3.327	-1.81487	-3.66819	-2.21986	-6.45818	-2.94918	-0.161797	-3.81805	-6.03909	-2.81069	-3.53439	-1.97078	-3.82413	-5.7537	-7.11975	-7.1208	-5.75447	-8.21277	-3.4632	-4.28412	-4.93998	-8.1778	-3.2524	-6.02851	-3.18382
			-5.33007	-9.38212	-8.37048	-6.09399	-7.10541	-8.06064	-8.9259	-8.05266	-5.57805	-6.2577	-9.11185	-9.18618	-10.1094	-9.82579	-10.705	-10.0069	-9.16833	-10.0725	-8.40164	-10.9217	-11.9465	-12.765	-8.89194	-14.0312	-10.7681	-7.75312	-9.95653	-8.03501	-9.16619	-9.76417	-9.73665	-10.5571	-9.71737	-8.25254	-12.0305	-12.3854	-13.3436	-15.6713	-14.9869	-16.955	-15.5595	-20.1992	-20.1879	-12.8462	-10.5446	-9.68537	-5.43764
			-3.19461	-3.63277	-3.01934	-1.59607	-2.04622	-4.28078	-2.14611	-4.45302	-3.1264	-3.21526	-4.47443	-2.66409	-0.131476	-1.93296	-1.03808	-1.53487	3.18361	2.28664	0.320521	0.00792263	-2.08606	-1.61103	-1.79468	1.04545	-1.0088	0.710547	-0.777159	0.287212	-2.42876	0.548629	-1.90408	-1.27493	1.70563	0.216104	1.04889	-1.25794	-6.30059	-1.75085	-4.52685	-5.38557	-2.92298	-5.51143	-0.0250437	0.081226	0.964079	-0.3426	2.33959
			-2.47699	-0.985915	0.173459	-1.71472	1.09725	-1.11474	-0.871268	1.36694	1.01926	-0.447712	0.0840932	-2.02049	-0.476348	-0.211025	-0.318717	-1.82511	-1.73237	-0.736331	-1.24903	-1.84828	-0.856821	-0.369717	-0.611348	2.19343	1.33456	2.93861	-0.901624	2.31411	2.82014	2.42816	1.14301	3.19633	3.65304	3.13674	4.12979	2.92285	-0.458383	3.89986	4.81377	2.22469	4.35609	4.68141	6.29032	8.0428	11.0758	13.1202	10.1957
			-1.92864	1.72729	0.492128	-0.182525	0.0474656	0.170955	1.75487	0.201428	0.996284	2.07773	0.821473	-0.0866023	1.1422	0.21539	0.28656	2.28517	1.88584	1.21747	2.10756	1.53087	1.31378	0.876221	1.21974	0.5461	1.96353	-0.737309	-0.0461489	-1.26754	-0.546235	-3.05061	-0.304175	0.905554	-1.51908	1.86889	2.04098	1.84348	3.16709	4.67171	4.35247	5.18764	7.11115	6.8085	8.43453	8.6139	10.3964	11.7581	13.9883
			1.02753	-0.380786	1.13909	-0.470983	0.608301	-0.104102	1.02317	-0.411364	1.02628	-0.736248	-1.15018	-1.93902	-3.39926	-3.74607	-2.53325	-2.70245	-2.29012	-3.0464	-2.80478	-4.38844	-3.10434	-2.79974	-3.84403	-5.24225	-6.11593	-6.88331	-5.31169	-6.80357	-6.44803	-5.93702	-6.61368	-7.3122	-5.41123	-1.45011	-1.48804	1.7691	4.58802	6.55248	6.49129	8.53535	10.4458	10.4204	12.153	14.2239	15.2606	15.3349	16.6288
			-2.1161	0.186687	0.41951	-0.717258	-0.527983	-0.356694	-1.60139	-0.0589626	0.591348	-1.39484	0.845327	0.6914	0.391248	-1.71918	-0.963295	-0.476895	0.0251452	-0.0679452	1.10781	0.311687	-0.0949723	0.493637	0.111694	0.333525	1.04787	-0.88069	0.549571	-0.004028	2.27771	0.68024	1.18739	1.06235	0.517703	0.63107	-1.61892	0.533644	0.960066	0.399169	0.574575	0.713125	0.812602	0.0373826	-0.274557	4.60762	1.48779	2.83627	0.576879
			4.63668	3.79664	4.36149	4.83034	7.83674	7.30527	7.02346	8.53843	10.0658	11.328	11.0558	11.6142	14.467	12.4881	8.49682	11.1188	9.99712	8.08753	7.02449	9.95678	10.5651	12.0185	12.7086	10.4233	11.513	9.60486	9.2341	7.20118	8.22944	8.19628	4.75525	2.40624	5.75358	7.59795	10.8855	7.88011	6.47064	7.05503	7.57782	10.5859	12.2407	14.0063	18.1927	15.4227	17.6467	21.9394	20.2099
			-2.7759	2.07774	-1.13693	-0.356136	-2.17668	-0.290714	0.984741	1.04912	0.33366	2.03542	0.633413	1.68699	2.40561	3.10427	2.05386	0.851637	0.596593	0.598839	2.73146	2.95952	2.75715	4.06995	1.81073	2.52945	2.07455	3.86526	3.37514	0.785333	3.49252	0.704233	3.54957	-2.71303	6.46025	-0.315205	0.916566	-2.44876	-1.61963	0.024252	1.74343	-0.559329	1.83871	3.37404	3.04327	2.47507	3.48978	5.81066	4.7374
			-4.46219	-1.82027	-4.81224	0.044359	-3.39489	-4.50253	-4.29608	-2.11234	-2.73388	-5.74059	-0.424344	-1.14292	-4.04312	-1.29533	-1.25545	0.270483	-0.517704	-2.08304	-2.72346	-0.662983	-3.8132	-3.5675	-3.82976	-0.0650522	-4.04733	-4.80767	-0.680406	-2.124	-3.48673	-1.95263	-1.39688	3.02463	2.38723	2.3919	6.84043	5.23558	1.79847	5.77294	6.67925	5.17964	7.766	10.5155	12.2021	16.8704	16.251	14.1786	16.387
			-6.51797	-7.53101	-7.75552	-7.7493	-7.22518	-8.05755	-9.21486	-7.31725	-8.70302	-7.61409	-8.77551	-7.66515	-9.22476	-8.31589	-8.16249	-7.98213	-9.37591	-8.42525	-9.53967	-10.6875	-10.9871	-10.9759	-11.7146	-12.3992	-12.1797	-12.0967	-12.9303	-12.7609	-12.3605	-12.0818	-12.3776	-12.7559	-12.718	-12.7555	-12.9603	-14.9279	-14.3978	-15.021	-14.7941	-15.7251	-15.626	-16.1961	-16.0963	-17.3177	-17.4802	-17.4784	-16.6755
			-8.3848	-8.18852	-9.47055	-8.12869	-8.32729	-7.8737	-8.84279	-7.48679	-6.42794	-7.84877	-7.132	-8.58534	-7.42529	-5.22082	-5.8787	-5.7175	-7.56829	-6.53188	-6.66973	-6.58691	-5.66589	2.15959	-2.29018	-0.768647	-5.94627	-8.51806	-7.68713	-8.5408	-6.97099	-10.2427	-9.09472	-6.9902	-7.5078	-7.08507	-8.2434	-8.30659	-7.23701	-4.8868	-4.65847	-4.99593	-5.11705	-3.43044	-1.17277	-0.0780922	1.17515	2.16573	3.63992
			-4.28284	-5.14224	-4.50956	-5.11792	-4.64345	-6.42005	-5.19144	-5.40682	-5.00725	-5.12579	-4.76996	-6.18667	-5.14303	-4.13471	-4.20857	-5.1031	-6.57335	-5.60407	-5.40991	-5.72468	-4.90797	-5.04	-6.21526	-5.31916	-5.22345	-4.9743	-5.67089	-6.2653	-5.18445	-5.44104	-4.21158	-3.72792	-0.913436	0.169066	1.2183	2.61965	3.45276	4.80011	7.96389	7.26817	9.665	12.8113	15.1968	18.5325	21.4834	27.5334	30.8943
			-10.8482	-9.28275	-11.3166	-11.3795	-11.9849	-10.4063	-10.1854	-11.9542	-9.23636	-9.88507	-8.32978	-7.9139	-9.18444	-9.49703	-9.12867	-9.25919	-10.2094	-10.2244	-8.86572	-8.75402	-10.9781	-11.2681	-12.3591	-12.9623	-13.9503	-14.4796	-13.8062	-16.9535	-17.4522	-14.3123	-13.3443	-7.52526	-6.70447	-7.46245	-6.00166	-4.986	-6.63452	-5.943	-8.0413	-2.77097	-4.00799	1.26943	0.545427	2.8357	4.31183	8.69404	10.6042
			-15.3875	-14.4526	-13.0792	-15.6657	-11.8599	-12.6282	-12.9193	-13.2297	-13.0065	-13.1983	-12.8569	-11.9244	-11.677	-13.6149	-10.6919	-11.0747	-10.7401	-11.9198	-10.65	-12.2804	-11.114	-8.20669	-11.3989	-11.259	-10.8124	-11.3777	-14.1321	-13.5733	-12.2933	-14.0048	-11.5804	-8.02492	-5.1603	-3.2266	-2.58049	-3.56821	-4.55679	-5.76547	-2.1668	-1.11992	-0.0400651	1.53604	3.60134	5.45001	7.00055	10.9512	13.7753
			-8.46147	-8.86705	-8.12509	-7.28231	-6.5546	-9.07502	-6.78701	-7.9628	-10.1621	-8.99932	-11.8319	-11.5255	-12.3824	-10.8471	-13.5285	-10.0014	-14.4441	-12.6959	-13.475	-13.734	-11.3372	-13.3776	-13.966	-11.0414	-9.30973	-13.5813	-10.6682	-9.62804	-8.98597	-11.9931	-11.4408	-5.97058	-3.04438	-6.21481	-8.30617	-7.455	-7.69597	-7.8224	-6.18678	-5.45133	-6.8127	-3.33047	-4.70013	-3.86591	0.808962	0.573085	1.37332
			-9.91506	-11.9437	-12.2371	-11.5505	-10.473	-8.74027	-9.62521	-9.57926	-9.51705	-9.364	-9.82696	-12.044	-11.7415	-11.1922	-11.1868	-9.39091	-9.07605	-6.02702	-4.45604	-4.34178	-2.89945	-2.82519	-4.14689	-2.44521	-3.20746	-4.05466	-6.76562	-6.78863	-5.63961	-5.91931	-1.43147	0.505334	-0.400061	-2.77928	-1.41365	0.649678	-0.174739	1.92059	-0.657569	-0.0751677	3.09324	3.73586	3.1586	3.35589	5.02467	9.29423	9.8617
			-0.729015	-1.23402	-1.42423	-1.75939	-2.29284	-0.0077324	-0.959746	-3.08278	-3.0871	-2.805	-4.81699	-4.9429	-0.698592	-2.67444	-2.14534	-3.14087	-0.30932	-3.29047	-4.52306	-6.35151	-4.74455	-2.04627	-1.79788	-4.0848	-1.82898	-0.912366	-0.896606	0.192424	-0.975388	0.803846	1.89083	3.30796	1.50213	-1.31049	-1.94799	-1.31598	-0.652375	-1.8606	0.214627	0.278025	-0.970707	0.923678	-0.538822	-0.308528	-0.0760478	-0.733893	0.265571
			-11.1868	-12.7528	-11.9869	-11.5587	-11.8934	-11.7784	-12.2263	-15.5102	-12.7212	-13.0992	-12.3469	-12.8912	-13.1319	-14.3005	-13.7603	-14.8031	-14.2934	-14.2452	-15.7224	-15.1092	-14.5136	-13.8865	-14.4023	-16.2735	-15.8941	-16.2056	-17.7597	-15.2284	-15.7959	-14.5679	-16.1837	-13.6765	-15.2875	-12.1212	-13.6836	-15.093	-13.4274	-13.7541	-13.0613	-12.7391	-9.25023	-9.53584	-8.12648	-7.69013	-6.98324	-7.18783	-5.87015
			0.965626	-0.502671	-0.895398	-0.827805	-1.72512	-4.10558	-0.559198	-0.565279	-0.230956	-1.65671	-1.55006	-3.12993	-1.83675	-1.91031	-4.59393	-5.0355	-5.44885	-3.47064	-5.63363	-5.11899	-6.41248	-4.20229	-6.29884	-4.56639	-4.77237	-4.66842	-4.92612	-5.1727	-6.62556	-4.79425	-17.2195	-33.8343	-15.8187	-7.04359	-9.67585	-13.8298	-7.7711	-6.36043	-4.99903	-5.82754	-3.79168	-6.05429	-5.18181	-4.86563	-3.94241	-1.75839	-1.6351
			4.58907	1.66224	1.61479	0.7588	3.20593	2.36194	2.97567	3.30166	4.62486	1.60013	2.49341	2.647	3.24989	5.68929	3.30983	4.69499	6.26124	5.77383	4.83203	3.14333	4.4749	3.8773	5.92526	5.02852	4.12157	3.6757	2.91584	5.3968	4.53041	5.49409	5.48024	12.9284	12.8517	18.0441	-5.00751	2.00348	7.28097	2.73981	3.03349	5.67502	5.65288	7.73965	5.36928	7.92225	9.28579	10.0056	12.1323
			-6.85485	-8.18342	-9.34857	-8.07323	-8.06151	-8.89306	-7.8864	-8.39819	-7.50747	-8.67294	-9.26654	-8.89434	-8.59908	-9.24748	-9.29191	-8.83302	-9.43496	-9.74461	-9.99681	-10.4304	-8.60682	-9.10318	-9.59566	-8.95311	-10.4607	-8.33453	-10.1026	-11.0392	-10.6549	-10.264	-8.56008	-9.59027	-10.8029	-9.94751	-9.76261	-11.0187	-10.7695	-9.94525	-8.71437	-8.78781	-5.97869	-5.90428	-3.18512	-2.1409	-1.04833	2.65558	3.96329
		4-10sessions	-8.24388	-7.07116	-7.48699	-7.92276	-6.91492	-8.26333	-6.45062	-6.37957	-7.18498	-7.06939	-5.36894	-4.68226	-5.99918	-4.94036	-5.20582	-3.24801	-3.90644	-4.42689	-5.90993	-5.69487	-5.17482	-5.65484	-6.13964	-6.17029	-6.40605	-7.0202	-7.74885	-8.09639	-9.18298	-11.5022	-8.4833	-7.33849	-7.84584	-5.08889	-3.61108	6.13088	8.16992	7.45806	11.2135	13.9983	13.7738	16.6169	17.3253	19.6782	21.0489	21.234	22.6217
			-14.3627	-14.4086	-15.7034	-15.0052	-15.098	-14.7152	-16.0538	-14.141	-15.0333	-15.0965	-14.9404	-16.1896	-15.8144	-15.0447	-13.8905	-14.5905	-14.073	-13.9267	-15.0384	-13.3606	-13.7581	-14.9595	-15.0611	-13.0255	-12.4485	-15.2228	-12.9928	-13.1657	-11.9316	-11.6865	-12.4251	-13.0986	-11.2118	-6.33898	-0.755767	2.34562	8.01374	12.8753	15.1246	16.4801	16.5117	18.3245	21.7602	23.7563	23.0428	25.1728	26.9636
			-3.95235	-3.48325	-2.98772	-2.85705	-3.38486	-3.18293	-3.41839	-3.87204	-3.64703	-3.41598	-2.72779	-2.05744	-4.42132	-5.05676	-3.29524	-3.44394	-4.21048	-4.02874	-3.92163	-2.49162	-5.21325	-4.21099	-4.42556	-7.07942	-6.48857	-5.53145	-4.44322	-3.94027	-2.87233	-2.70367	-3.10034	-2.62256	-2.25894	4.53792	11.3548	17.3156	22.0148	25.8132	30.4785	30.7236	33.4105	34.8967	35.5588	34.7238	37.2259	33.0912	34.7558
			-6.49196	-8.14982	-8.01617	-8.66576	-8.11689	-6.94598	-8.64935	-7.63105	-8.55186	-7.7873	-8.88602	-7.1908	-7.95069	-8.24027	-8.57826	-8.84587	-10.4763	-10.4697	-9.07029	-9.00484	-8.60382	-7.8268	-7.31909	-6.65787	-6.95534	-6.73391	-5.68943	-7.63773	-6.70201	-6.02316	-6.37207	-3.93031	-3.99693	0.261764	3.62021	8.70116	13.7963	17.8801	18.0058	19.8333	21.3337	22.7921	23.0375	24.7292	26.3715	28.1869	31.4596
			-7.91485	-7.60395	-6.85361	-7.44959	-6.72559	-5.11216	-6.99637	-6.44256	-4.4263	-5.02891	-5.18777	-6.19123	-5.06595	-4.80707	-4.26911	-5.89305	-7.25661	-7.57089	-8.52686	-7.1719	-7.1073	-6.62594	-6.8831	-8.01462	-7.80424	-8.90423	-8.51965	-7.18643	-7.23118	-7.21337	-7.58453	-8.07652	-7.1593	-0.513752	2.68451	10.2502	13.3195	14.8144	16.8795	18.3985	19.4836	20.82	22.0614	24.8851	25.5802	28.32	29.5041
			-5.40618	-6.44215	-6.01337	-5.91738	-6.06273	-6.44719	-7.78664	-4.81692	-4.90127	-5.35069	-5.30466	-4.56148	-5.75096	-5.95609	-5.32116	-5.00749	-4.8896	-4.39603	-5.53693	-3.99907	-4.04445	-3.67495	-4.1496	-4.72385	-5.18005	-4.48166	-4.97499	-3.93925	-5.35156	-6.41466	-3.40866	-5.0408	-4.16191	-4.84084	-0.451463	1.04716	5.26689	8.99193	10.4462	12.5722	13.5176	14.1309	16.4937	17.9828	20.5942	22.1354	26.1412
			-5.06419	-4.63102	-2.77824	-3.60817	-3.97939	-3.02529	-2.54066	-2.32854	-2.0443	-1.87212	-2.9164	-2.43027	-4.72831	-4.44435	-5.76497	-6.09921	-6.41625	-6.90383	-7.39499	-7.09986	-9.48845	-8.25071	-8.50741	-10.8311	-10.898	-11.4895	-12.8887	-11.8014	-11.0554	-11.7874	-12.2357	-10.8698	-9.80994	-8.41576	-4.61551	-2.11962	1.16738	4.89806	7.44278	10.3036	11.4544	13.7664	16.7614	19.7491	22.7824	25.9839	29.3134
			-2.70497	-4.84558	3.27908	-2.38378	0.551466	-1.14072	-1.57558	-2.12037	-1.47838	-1.82133	-2.70384	-3.26658	-2.67917	-2.62427	-1.36314	-2.89778	-3.88178	-2.30312	-3.03765	-3.79722	-2.13089	-3.52497	-1.12426	-1.6938	-2.84378	-3.5594	-3.04579	-3.83047	-3.63636	-2.05085	-5.17094	-4.12295	-2.12305	-2.50953	-1.51998	-0.749096	-0.687416	0.20296	0.28751	-0.594434	0.554143	0.860151	0.926161	1.45351	3.35858	2.17978	1.55472
			-8.06791	-10.5671	-10.9883	-8.04634	-7.5344	-8.04468	-5.91573	-7.01355	-7.5334	-9.14095	-7.22661	-7.46858	-7.26235	-8.32336	-9.69422	-10.1867	-6.85708	-5.14343	-6.42217	-5.64577	-7.68274	-5.37502	-9.51188	-5.51406	-7.40721	-6.28702	-10.4524	-8.65985	-8.91184	-11.1362	-6.04276	-10.0606	-6.68414	-3.87822	-1.56989	1.54539	1.34933	2.97842	1.75516	3.90312	4.01985	4.36531	6.7307	6.89975	8.83695	11.6949	12.2331
			4.71133	2.26302	2.70251	2.43327	1.46885	1.13263	1.72594	1.87513	2.7626	1.67928	3.07118	4.13958	1.93021	4.7671	1.63058	2.66121	2.34071	1.89511	1.98168	-0.165424	2.3557	3.5207	3.86905	3.6662	4.03373	5.6609	5.31573	3.67018	4.58571	8.06782	6.04171	3.6242	9.30416	8.50139	10.9344	12.0136	17.0057	17.7995	13.4868	17.9874	17.8794	17.3778	22.577	26.7162	27.595	29.0576	32.9018
			-6.48779	-5.37559	-5.70347	-6.9212	-2.87066	-4.89578	-5.76586	-5.97757	-5.51984	-6.33301	-4.69103	-5.96981	-4.41505	-5.63085	-3.39722	-5.70604	-3.92846	-5.70523	-5.6211	-5.48392	-3.83141	-6.68358	-4.47415	-2.30605	-6.23988	-4.52907	-4.14022	-6.28336	-7.70734	-5.76274	-8.01952	-5.06836	-4.80199	-2.87674	0.884735	2.09914	5.07777	1.35022	1.51057	2.25959	2.95941	2.9441	5.87049	11.057	10.0155	16.3171	16.1259
			5.31367	4.32266	3.72672	1.46624	5.69779	3.88848	4.33893	5.29562	5.35609	3.18493	4.24996	3.55571	4.17056	3.22208	2.82243	2.91129	1.60942	2.50894	2.79558	1.88384	3.69282	1.6233	2.32994	3.56117	3.62914	3.91559	0.88366	4.75804	4.28414	1.71683	7.8602	0.651451	7.69881	4.46611	8.58849	6.63257	7.28691	11.3574	8.19795	9.47672	5.23744	7.67818	8.96741	11.9559	14.8403	15.5202	17.6119
			0.0671145	-2.50987	-0.893277	-1.01805	-4.30679	-3.13136	-4.35122	-3.48883	-3.36551	-2.22006	-5.02407	-3.449	-5.10213	-3.11001	-4.3165	-5.19305	-4.30748	-5.09711	-5.91468	-4.23055	-5.90904	-3.31784	-5.63972	-6.33287	-4.97401	-4.30786	-3.91818	-6.87947	-6.30643	-5.79006	-5.65685	-7.96179	-6.96346	-6.00698	-4.60091	-5.51008	0.55434	-3.00576	-2.14689	-1.74504	-0.107696	-1.11206	-1.51524	-1.32598	4.19053	2.55482	4.92636
			-2.99846	-7.15112	-5.99916	-4.30297	-4.71682	-7.02772	-4.4999	-1.90319	-1.60434	-8.11855	-5.08689	-2.91697	-3.04344	-4.2238	-3.71914	-5.32888	-4.91273	-4.21756	-5.44127	-5.15436	-5.40075	-4.34643	-4.15039	-3.63093	-4.60033	-2.91351	-2.41687	-0.93272	-4.26172	-3.0335	-1.67652	-2.71644	-1.63459	-3.31333	4.84042	-0.162468	-0.470904	2.54827	5.51766	3.79272	2.34243	3.58461	5.47999	11.362	6.35251	7.44432	13.1447
			-1.79544	-1.56388	-1.85725	-3.17741	-1.59928	-1.48768	-2.43516	-3.62512	-3.12582	-4.27286	-4.71901	-4.56343	-4.04984	-3.51157	-6.82359	-6.09418	-5.56564	-5.26306	-6.30837	-5.49342	-4.36899	-5.1524	-6.82035	-6.44363	-5.92906	-5.3603	-5.40884	-6.89733	-7.75563	-5.9229	-7.27632	-2.69211	-0.551543	2.05836	4.82288	3.68605	4.3572	4.2963	4.2414	3.81532	2.73204	1.14714	0.0698598	-0.457323	-0.645692	1.93334	0.924706
			-2.83557	-4.07067	-3.99509	-3.64065	-4.39374	-3.02255	-4.50262	-4.49723	-4.68502	-4.69483	-5.04625	-3.97307	-7.72618	-4.76013	-4.97992	-4.44495	-4.2357	-4.16014	-2.50067	-3.70854	-4.37287	-4.69881	-4.42404	-4.47696	-3.92207	-3.4021	-4.29757	-3.76917	-5.48773	-5.94198	-4.27417	-8.1523	-7.65431	-3.82462	-2.32691	-1.69788	-1.88569	0.436779	-3.4273	-2.17072	-2.28803	-2.11311	-2.06588	-1.19683	-1.7494	-1.84954	-2.14541
			-4.17034	-4.20784	-4.7084	-4.56264	-3.78732	-3.77761	-4.40361	-3.90457	-3.62473	-5.55496	-3.92471	-2.45951	-3.54466	-4.59662	-3.1531	-4.25642	-3.79739	-4.5272	-4.01873	-5.24089	-4.16862	-4.54135	-3.17171	-2.62091	-1.62921	-2.2696	-3.1767	-2.47457	-2.34856	-2.06241	-0.807545	-2.50721	-5.93518	0.369889	0.295344	3.24535	3.18413	1.97381	2.40218	2.14089	2.61885	0.593182	1.70593	-1.17482	0.363259	0.0853295	0.519373
			-1.59875	-2.21471	-1.97053	-0.507493	-3.57222	-1.64797	-2.3564	-2.42568	-2.71065	-0.828222	-4.02682	-3.14761	-2.34814	-3.26729	-2.94841	-3.79111	0.152856	-2.85156	-4.07089	-4.00614	-5.6324	-4.45646	-5.9696	-4.6091	-3.89188	-3.94487	-4.19663	-5.52833	-2.41406	-3.71869	-3.83971	-3.3791	-8.62901	-1.04303	5.69574	5.68672	3.73632	6.50175	4.5275	3.41674	1.28156	4.01208	2.56509	4.37116	4.68461	4.97701	6.46783
			-6.68114	-7.68902	-6.9681	-6.8147	-7.14007	-6.60967	-5.73067	-6.75122	-6.43968	-6.29801	-6.08719	-6.72553	-8.6853	-8.91821	-7.74118	-6.30077	-6.44055	-5.76941	-6.74613	-6.25272	-7.04177	-7.44398	-6.96131	-9.58881	-8.1713	-8.16053	-7.45484	-10.013	-9.50438	-11.5776	-8.8773	-14.1037	-12.4769	-2.04505	-3.04003	-0.00641684	2.65084	2.6497	-1.32219	-0.209567	-2.44154	-2.86631	-2.40489	-1.65165	-1.77481	-1.73091	-0.371831
			-7.71415	-8.63375	-7.74901	-8.4953	-8.68008	-6.42449	-7.20159	-11.4335	-10.0691	-8.6988	-8.99343	-11.0521	-9.00688	-10.731	-10.8141	-12.8087	-11.6902	-9.64723	-9.64547	-8.01532	-3.89978	-7.59629	-8.25399	-9.6528	-9.32182	-10.1824	-9.61101	-10.81	-10.3965	-7.52273	-9.93859	-10.3241	-7.64977	-5.82588	-2.0772	-2.89804	-2.70614	-3.34217	-7.01323	-5.45834	-3.98972	-4.71588	-3.75103	-2.25798	4.42433	2.25	-0.854695
			-4.38079	-6.7669	-5.83408	-4.36919	-6.05915	-6.08381	-5.43352	-5.88894	-6.26843	-6.33782	-5.9502	-5.02666	-6.18973	-5.70182	-5.08693	-7.25136	-4.493	-5.57701	-6.62938	-6.06215	-5.25168	-7.3742	-6.635	-8.08035	-7.28928	-8.30861	-6.32861	-6.5795	-8.2311	-7.87596	-6.35366	-8.79523	-4.83027	-4.48496	-4.11703	-4.20827	-6.29055	-3.80046	-2.33109	-4.12206	-4.33374	-4.21504	-4.32455	-4.91804	-5.10444	-2.61706	-1.09135
			1.40487	-1.41726	-2.11719	0.859322	2.9751	-0.777549	2.46124	3.48891	3.29732	2.6129	4.59253	5.82351	10.032	6.44304	7.40879	9.05552	9.38253	6.70844	9.80107	10.7406	11.3754	15.8659	17.0376	16.0566	15.5052	12.856	14.9581	16.9191	13.8233	14.8209	17.8511	27.5356	25.8502	27.6645	25.3217	27.3988	20.7164	12.206	10.3841	10.0127	10.1594	13.8169	20.71	17.8713	24.7493	33.7847	46.8438
			-16.5559	-12.5186	-9.71422	-10.0848	-11.7128	-14.669	-15.5487	-12.8866	-11.6444	-14.1777	-13.6184	-12.6619	-13.7716	-13.0887	-10.8251	-13.5543	-14.5652	-12.3905	-12.181	-11.0203	-9.82272	-11.4114	-10.1857	-10.2233	-12.2501	-9.61088	-11.2186	-13.5852	-11.0877	-13.3888	-11.3799	-12.8938	-7.15285	-10.0504	-6.25396	-10.1834	-10.4789	-12.036	-13.1127	-16.3726	-17.5541	-16.5439	-14.2299	-10.9012	-6.25015	-6.35919	4.74001
			0.536966	-0.136437	-1.13275	-0.0598118	-2.42366	2.59496	-2.17675	-0.982351	-3.55522	-0.243516	1.3878	-2.06571	-3.82588	-2.67685	-3.98647	0.497081	0.585732	-1.75081	0.510711	0.689513	-2.72373	-0.284922	-0.837453	-1.58319	-2.37276	-1.84159	-2.17047	-2.2059	-0.953749	-2.84465	1.59746	-2.71775	-0.364459	-3.60173	-3.805	-6.25367	-3.96937	1.37437	2.78191	5.79176	5.87889	8.25633	9.31336	13.6267	20.8543	21.7487	27.5564
			-3.18626	-4.28887	-2.04344	-2.41044	-2.46124	-3.784	-2.19801	-2.93487	-2.99398	-2.73002	-2.23075	-5.39982	-4.02733	-4.724	-6.97324	-5.81511	-5.86809	-7.7371	-8.08176	-8.51004	-8.54132	-9.69533	-10.2558	-10.4294	-9.6882	-9.90535	-9.03413	-9.38894	-9.2736	-9.83381	-9.93689	-6.59869	-6.83515	-8.78549	-10.7739	-9.4454	-6.36868	-5.96154	-6.52624	-2.25757	-1.96166	4.80517	7.52437	10.6966	14.4854	20.7372	24.5651
			-8.47017	-8.11516	-8.78748	-11.3388	-8.983	-10.6947	-9.45584	-7.8406	-8.16973	-8.96086	-8.30363	-7.51074	-8.07332	-8.12432	-9.43819	-6.83691	-9.51469	-8.43834	-9.50068	-9.47243	-11.8469	-6.95423	-10.074	-9.68026	-9.4378	-9.33495	-10.9641	-9.99717	-10.6591	-9.40446	-6.38493	-7.03752	-0.986854	-7.35053	-6.256	-7.86871	-8.26661	-9.75687	-7.36721	-5.0803	-2.91534	0.317816	0.965551	5.44994	11.2179	13.3518	16.1301
			-5.37804	-3.4959	-3.76963	-2.61988	-0.756777	-0.790885	-2.23586	-1.25927	-6.22279	-5.93746	-4.71436	-4.30435	-4.85817	-6.88579	-4.75603	-5.76703	-5.37784	-4.96582	-4.10741	-5.54277	-5.31509	-5.26738	-7.48391	-6.86768	-8.84006	-7.49863	-8.58702	-6.43884	-6.62545	-5.99993	-8.32943	-4.0574	-6.00625	-3.55812	-4.60122	-1.57822	-2.14709	-4.23806	-1.26706	0.416823	1.20512	3.66701	7.3609	6.3027	8.76065	13.4403	16.4509
			1.42079	2.25747	1.83059	0.748544	-0.171689	1.4344	0.717608	1.33758	1.46487	3.69051	2.55107	2.64295	3.6367	3.45119	4.1964	1.45745	3.75467	0.518411	1.31877	2.02393	0.663717	1.45028	2.45705	0.109096	1.18768	-0.159042	-0.736542	0.0560665	0.0241783	1.23179	1.95173	2.52152	3.11094	4.76181	0.901474	0.831766	2.42665	2.30575	3.11608	4.90961	9.77312	12.8339	12.6729	19.1042	23.291	27.0602	28.9003
			-6.99065	-5.7788	-8.41511	-5.50243	-5.9467	-7.38218	-9.55508	-9.23327	-10.4267	-10.2429	-11.0448	-10.2638	-13.0794	-10.1125	-12.0718	-11.4634	-10.1377	-7.68791	-8.27189	-9.90231	-7.24772	-7.95346	-9.22784	-8.11051	-10.0533	-8.1166	-8.80917	-7.79608	-7.44356	-6.36572	-8.36431	-3.22149	-4.77508	1.43336	6.40627	7.9713	9.32233	13.8742	19.7791	20.3849	21.8433	19.9291	23.3255	24.5684	28.9639	33.1726	34.662
			-7.55983	-7.26766	-7.39215	-7.26094	-7.86321	-7.53439	-8.91025	-7.38927	-8.91131	-7.6952	-6.7605	-6.28801	-6.58963	-7.83081	-7.07639	-8.1618	-8.28134	-8.33018	-7.88513	-6.52701	-8.82726	-6.63797	-7.44567	-5.81272	-7.92179	-3.97561	-4.35661	-3.12588	-5.82568	-2.05373	-1.77669	-3.12212	1.23341	5.74034	7.25213	10.0401	9.12878	11.9603	14.8661	14.8411	17.1644	17.8471	18.246	20.845	23.2453	27.3483	29.8987
			4.30388	2.07045	1.04079	5.09492	0.964198	2.90714	2.43135	3.75584	4.46004	5.27124	5.74532	4.30613	5.95731	3.96087	3.39817	3.4345	6.30278	2.13304	2.38897	0.557096	-0.388918	-1.30217	-0.290264	-1.99207	1.50224	-1.44313	-3.00759	-1.94788	-3.02804	-0.106161	0.0979035	2.17772	9.70766	17.2628	18.2819	20.5705	22.9109	24.284	25.1199	25.9301	30.9002	33.7024	29.83	33.6942	35.3618	34.8304	35.5506
			0.292572	2.06087	1.5678	1.89575	3.38402	2.37276	1.42762	1.71796	1.72544	3.58476	4.69006	2.15257	2.575	4.06502	2.40271	4.83428	3.81479	4.33288	3.78153	3.1846	3.68281	4.25443	3.73602	3.99633	2.72243	3.95369	3.03243	4.65758	2.67081	5.51727	2.91078	4.07335	6.40291	4.97372	7.04776	9.37284	7.88967	9.64472	10.6857	9.39477	12.739	11.2764	13.4511	15.5443	18.7888	20.9487	23.3389
			-1.2847	-3.23988	-3.11368	-3.59543	-4.27467	-3.0702	-4.2251	-4.8078	-4.62105	-5.3848	-3.97746	-7.08906	-4.3017	-4.36222	-5.44309	-5.83446	-5.28568	-5.75153	-6.37779	-2.33439	-2.303	-2.89586	-1.27861	-2.01368	-2.91457	-2.57819	-0.938137	-1.51229	-1.78017	0.800227	0.462691	1.85073	0.0441891	-0.262041	-0.850003	1.06638	0.218698	-0.122577	1.19878	0.108067	0.976057	0.26818	1.36797	4.0166	5.60278	6.22462	6.84094
			3.10191	2.37531	2.5255	3.26729	2.58968	2.50148	4.27614	5.44084	7.50412	7.46297	3.13347	5.90302	7.19798	4.86605	4.90958	9.89102	6.84587	8.24068	7.42534	11.4925	8.33792	8.32995	8.13295	7.17284	10.106	8.9892	6.90093	10.7967	10.2673	9.09951	12.6783	13.6935	10.3554	15.8518	15.8081	15.4951	13.3205	17.4979	18.8583	20.4106	20.8727	25.0526	22.5995	25.8093	27.7814	27.5534	34.6726
			-14.2438	-15.3438	-15.6927	-17.8199	-16.2441	-17.4284	-17.9087	-19.9463	-19.2961	-20.4623	-23.0309	-21.682	-21.0429	-22.9772	-21.7976	-22.8633	-24.1337	-22.2535	-22.3203	-24.9271	-25.399	-25.3707	-25.2438	-24.2112	-24.9907	-24.6917	-25.15	-26.1731	-26.4579	-28.0868	-26.9175	-23.7731	-23.3759	-21.9808	-21.9437	-19.5466	-17.5473	-17.9047	-17.0156	-17.2335	-17.1621	-13.585	-12.6472	-11.3619	-7.18161	-6.03474	-3.55216
			-3.73769	-4.67608	-3.33347	-2.17081	-1.31922	-2.05377	-2.67839	-5.26672	-4.10948	-2.18719	-2.79345	-3.34408	-4.41124	-6.24768	-2.30039	-10.9331	-6.41977	-4.70664	-6.51924	-3.64373	-1.67604	-4.14714	-2.49654	-0.746012	1.69222	0.358277	4.09125	-1.30995	-2.93418	0.121966	-3.49929	-1.26924	-3.8841	0.855847	8.29643	11.8623	14.3501	16.9507	19.199	22.4586	25.2465	26.5613	29.966	33.9481	37.9302	42.5543	44.5126
			-8.2857	-9.47764	-9.50433	-11.3723	-13.5834	-10.5729	-8.17595	-12.827	-11.7459	-12.4163	-14.0992	-12.5074	-11.6615	-9.47391	-12.4325	-11.6466	-9.01939	-10.4908	-12.2376	-12.2627	-14.0561	-12.964	-15.1741	-15.4441	-12.0562	-14.5935	-15.6155	-14.7563	-13.3464	-15.8663	-15.3964	-12.3254	-3.42632	7.58157	14.5204	12.1363	5.36963	4.42422	4.48615	1.78631	4.38264	3.77049	7.82586	8.02373	13.6649	17.5544	21.9432
			-9.58315	-7.40096	-10.2236	-8.51493	-10.3217	-9.62467	-8.0813	-9.4516	-9.70017	-9.884	-9.97925	-12.9296	-12.6564	-10.3274	-10.5418	-10.8839	-10.9847	-12.1885	-9.98081	-11.3132	-11.2175	-11.6162	-12.4922	-14.8514	-12.0258	-15.1342	-14.3568	-14.2078	-16.1226	-15.5957	-16.0494	-11.2972	-8.19243	-2.10445	-0.483165	-2.23305	0.263817	0.78456	-0.719012	-2.23731	2.2462	2.32057	4.35492	5.39717	8.91662	13.9718	17.8818
			-3.42839	-3.1266	-3.50513	-4.2568	-3.29578	-3.846	-3.5066	-3.94185	-3.81535	-3.68458	-1.64429	-2.80155	-2.88434	-1.58789	-1.32357	0.583735	-0.983976	0.272476	-0.742574	-0.857115	-1.57293	-1.52205	-1.52953	0.268137	-0.64145	0.30038	0.788321	-0.141082	0.433457	-0.784391	-0.0475403	1.95953	2.71836	5.82586	9.45451	12.9945	15.1201	16.0817	16.787	19.88	19.5255	21.782	20.5977	22.0322	22.9816	24.913	27.5783
			-7.16654	-6.48223	-8.05556	-7.47287	-7.7395	-7.51515	-8.92303	-8.87723	-8.46446	-7.51645	-9.6623	-9.38355	-8.10879	-7.75814	-7.87197	-7.75334	-9.24445	-8.75723	-9.11349	-9.37925	-9.26406	-10.3317	-9.50654	-10.6271	-11.442	-12.7845	-11.7117	-10.9626	-11.9654	-11.5177	-13.4122	-12.231	-7.277	-2.53829	1.72789	5.00789	7.58241	9.77923	11.6339	12.8844	15.2001	13.3101	14.5915	15.3635	16.9469	17.308	16.7013
			-9.27701	-8.09314	-6.467	-8.70108	-8.26484	-10.1945	-8.56192	-7.25681	-6.70531	-8.33854	-7.27273	-8.23483	-7.91293	-8.25826	-7.60619	-7.15168	-8.86453	-8.71926	-8.15621	-9.59791	-8.63382	-10.2387	-9.36473	-10.8293	-9.42197	-8.26819	-8.32002	-9.20259	-9.73777	-11.307	-11.5041	-8.94913	-7.14445	-4.21855	-0.21753	-0.300707	1.02273	1.12257	1.09507	1.63568	3.78175	3.54211	5.08541	4.58427	7.01485	8.05492	9.7734
			-2.09785	-2.33567	-3.73257	-2.97061	-3.75277	-4.57212	-3.51791	-3.64105	-4.01422	-3.41465	-3.78052	-3.17535	-3.08156	-5.80646	-3.65537	-3.97055	-1.87634	-2.94388	-4.08549	-4.33291	-5.40302	-4.50912	-4.7835	-4.1728	-3.86832	-3.32055	-3.69315	-4.86505	-4.52226	-3.05736	-2.77618	-5.85495	-2.58365	-0.0729542	4.69412	9.45388	12.5154	14.5264	15.1173	16.6458	18.2198	18.1233	20.1124	21.3358	22.6143	25.0666	26.6803
			-3.96513	-3.32397	-5.0474	-5.28692	-4.34271	-5.69261	-7.24598	-5.29168	-4.79513	-4.88138	-3.29286	-4.96137	-4.49692	-3.7011	-3.69694	-3.17	-1.67489	-1.87105	-1.45814	-2.61917	-1.90734	-0.184086	-1.1558	0.0152536	-0.992948	-1.4529	-0.896373	-0.736311	-0.689771	-3.1735	-2.13916	-5.1479	-3.15382	1.42043	3.13614	5.35421	7.76409	7.89754	9.50529	11.1549	9.92983	13.2128	12.6583	15.0503	16.061	17.2878	19.4165
			-5.33664	-4.05021	-4.24702	-3.30285	-4.43496	-3.49587	-3.56793	-2.94107	-3.20083	-3.94068	-2.18359	-2.76389	-4.15815	-3.57204	-2.61854	-3.64261	-4.26544	-2.57722	-4.2746	-4.29898	-5.17863	-5.0756	-6.32519	-5.30304	-5.48786	-6.00864	-6.11118	-4.96356	-6.37285	-6.31683	-6.63053	-6.91086	-3.22793	1.78156	3.99808	8.69572	10.9517	13.7471	15.506	15.7768	17.2515	19.2565	19.0544	21.164	22.2028	23.4253	25.0006
			2.24289	1.45993	1.31679	1.63946	1.12155	0.957808	-0.684334	-1.13405	-2.01549	-2.03054	-3.30822	-2.59224	-3.55536	-0.715087	-2.63106	-3.37271	-2.96366	-2.93656	-3.16983	-3.43933	-3.06418	-2.47075	-4.33655	-3.37243	-3.41496	-4.01455	-2.49947	-3.44598	-4.35775	-4.00086	-2.89027	-5.26811	-0.960917	2.2428	3.6331	5.11455	7.3054	8.91666	8.65523	10.1559	11.6873	12.6315	12.9159	13.6496	15.5834	16.9618	18.63
			-7.67595	-7.75705	-7.44965	-4.37915	-6.22306	-6.52034	-6.06508	-5.22347	-7.51099	-6.73735	-5.05595	-7.18691	-9.02563	-7.12155	-6.8192	-9.7438	-10.1841	-10.5487	-10.3029	-9.88611	-8.19299	-9.43366	-9.07277	-9.6368	-7.84598	-9.66072	-10.2752	-7.00269	-7.38695	-6.30252	-10.3318	-8.35179	-2.29612	-2.89668	-0.383412	-1.62611	-7.08015	-5.18797	-9.05447	-7.61321	-7.05476	-6.43168	-3.97476	-5.74144	-5.66592	-1.82335	-4.61379
			3.92565	0.360794	-0.0620469	0.725919	-2.58879	-0.123671	3.02453	3.65961	2.44619	1.54727	3.26261	3.86558	3.55025	4.37048	3.88975	5.06605	4.55005	4.68292	4.90999	4.01599	3.90318	5.62823	4.31064	5.65134	5.57964	3.49864	5.94094	3.92179	4.12163	3.95466	1.25414	3.0942	7.98427	-7.35741	7.68433	7.38248	5.35282	11.0014	10.7809	13.544	14.2268	13.2931	12.8059	15.3828	15.4582	14.5171	15.8453
			-5.20539	-2.60563	-4.12875	-3.38423	-5.45673	-4.62796	-3.72617	-4.82367	-2.81507	-3.54802	-2.73903	-1.9401	-1.51969	-1.82899	-3.70826	-2.15538	-2.92857	-3.19543	-3.37306	-3.87403	-5.78535	-3.96811	-4.16537	-2.66929	-3.08108	-5.11877	-5.13619	-6.4742	-6.72098	-7.15029	-7.05359	-7.34914	-3.49363	2.17067	1.8902	-0.455394	0.699683	-1.96527	-1.9249	-0.00164319	0.536669	3.26224	2.04335	2.71423	3.47444	2.35204	4.16242
			-10.0596	-7.93996	-9.24481	-7.23109	-8.52661	-7.46841	-7.03123	-8.2234	-9.70518	-9.77927	-9.85926	-9.34513	-10.4025	-8.86915	-8.71674	-8.46271	-9.80888	-8.4387	-8.44919	-6.85969	-3.88531	-4.51298	-2.81286	-2.97571	-2.70584	-3.55094	-4.71761	-2.70827	-5.63098	-4.20712	-9.59371	-13.7907	-3.89283	-3.41148	-3.01529	-2.21173	-3.54865	-2.68509	-2.60275	-0.424403	1.21277	0.530691	1.68947	3.5757	5.19402	7.59564	7.40995
			-5.96471	-3.42676	-4.36571	-4.42475	-4.81554	-5.34195	-5.68664	-4.96343	-4.80731	-6.18647	-4.67444	-5.60008	-4.25426	-4.31032	-5.56386	-5.68062	-4.18038	-4.89691	-6.16092	-5.62725	-6.66522	-5.16278	-6.80682	-6.60639	-4.81035	-8.08627	-7.56663	-9.55181	-9.84812	-7.70024	-7.97095	-11.1029	-6.20055	-9.55657	-9.79066	-8.84557	-3.62242	-7.64222	-4.85263	-3.76121	-2.42852	-1.65168	-0.9963	1.63292	3.15819	3.30537	3.64485
			3.60743	4.38064	4.48314	5.48656	4.942	1.67182	2.11224	4.15244	3.51101	3.13478	3.32079	2.53608	4.63556	3.46183	0.921438	2.19976	1.08265	1.08633	1.70222	0.208669	-0.44462	0.176338	-0.0841357	-0.648203	1.50094	-0.115351	1.14666	0.824595	0.431155	0.429921	-1.72279	-2.49344	-0.250767	-0.423091	4.49405	3.83438	3.51062	2.34869	3.59081	0.287869	3.26998	3.44441	1.8596	3.12614	6.2291	5.2551	7.71999
			-7.17487	-5.35082	-6.91207	-5.2913	-7.74844	-6.7208	-7.00664	-5.68179	-5.83901	-6.05399	-7.52242	-7.91341	-6.5441	-6.4967	-6.2074	-5.49807	-7.71758	-7.0847	-6.91527	-5.48978	-6.08458	-6.34482	-5.67307	-4.59106	-6.84213	-7.66437	-7.5919	-6.60794	-6.39499	-7.86558	-8.54633	-4.53446	-10.603	-7.07884	-6.04394	-7.89047	-5.18935	-5.81254	-4.4173	-1.13808	-2.02103	0.629461	1.04747	3.14225	5.01968	6.4208	10.0933
			-5.17355	-3.80557	-4.33446	-4.01136	-4.43764	-4.86412	-4.38921	-4.99515	-3.84866	-5.58065	-3.57657	-4.60659	-4.59768	-5.04046	-5.38048	-5.21429	-4.47723	-4.9143	-4.92508	-4.18496	-5.23662	-5.58694	-4.46891	-6.20991	-4.08949	-4.82406	-4.06384	-4.71467	-5.30544	-5.82137	-2.85611	-0.985516	-2.09783	-3.1699	-2.08312	-1.4568	-2.36	-1.32206	-4.1607	-3.10336	-1.57943	-0.953886	0.455263	3.20741	5.60009	7.6076	11.0925
			-1.71189	-1.81436	-2.70567	-2.13554	-1.5159	-1.93464	-1.41725	-0.526976	-0.838436	-0.26079	-0.658582	0.110291	-0.74432	-0.690995	-1.04984	-1.33897	-0.651887	-0.988491	-0.0150174	-0.353458	0.290134	-0.584452	0.547123	0.263018	0.923332	0.434407	-0.109854	-1.00629	-0.687277	0.812095	2.9183	1.41069	2.3953	1.34755	1.11345	1.31816	1.44138	0.149869	1.81631	1.04165	2.568	3.47008	5.01745	6.87507	9.97311	12.3729	14.7549
			-3.53315	-2.61736	-3.23391	-2.71334	-1.77722	-1.65544	-1.63719	-1.5466	-2.42504	-4.08652	-2.61789	-2.65595	-1.30099	-0.402285	-1.97858	-3.16061	-3.14581	-2.5008	-2.94851	-2.70666	-2.12028	-2.69732	-2.65894	-4.06129	-2.3172	-2.97216	-2.8113	-4.2058	-3.56875	-2.32458	-0.344491	-1.11205	-0.155323	-1.06669	-1.24439	-2.04243	-1.33971	-1.73106	-0.980923	-1.69779	-0.275931	0.0392041	2.71873	2.97895	5.57683	7.68421	9.0858
			-6.37269	-5.39596	-5.72046	-7.25461	-6.90256	-5.90201	-8.28511	-6.81969	-8.09627	-8.4576	-9.27734	-9.66197	-9.96014	-11.8948	-11.8264	-9.82166	-10.5226	-9.7026	-10.6146	-10.1213	-10.0325	-10.1068	-11.0596	-10.7855	-11.1897	-11.101	-11.2963	-11.7057	-11.7403	-9.39551	-10.6259	-9.8454	-9.91426	-10.4425	-9.77099	-9.12404	-8.78628	-7.8994	-7.70265	-5.30801	-4.19884	-1.87146	0.527936	2.57968	5.06062	9.11641	12.443
			5.74577	6.68223	6.25528	5.14233	5.50773	5.88854	6.11521	6.40159	5.9832	6.0884	6.74531	5.66468	5.88694	6.17801	4.16035	5.07117	6.73603	6.30574	7.08052	6.18941	5.17904	5.70947	4.57734	4.15829	3.52385	3.38826	3.84838	3.15912	2.54254	1.7018	2.74648	2.93418	3.16152	2.14071	2.44063	0.640349	1.42963	0.966405	1.43923	2.29242	3.29027	5.28951	7.23699	9.73029	12.3602	14.7779	16.8754
			-2.57869	-3.66308	-3.83208	-3.52126	-3.79666	-4.10472	-4.67071	-2.8905	-3.38187	-3.05243	-2.82109	-3.50814	-4.97821	-4.39547	-3.98478	-2.89652	-3.74639	-3.25349	-2.7267	-3.27107	-4.01297	-2.95567	-4.13952	-5.48743	-4.47522	-5.40804	-5.77307	-5.22221	-4.50488	-3.57443	-2.29578	-0.308953	-2.64323	-2.88295	-2.28417	-2.42708	-1.80466	-0.989	-0.357414	1.56954	3.18174	4.29579	8.08188	9.72845	12.8079	16.8139	19.3347
			-4.90122	-4.06231	-4.07973	-4.71039	-4.70322	-3.41609	-1.37303	-2.86676	-1.74719	-2.56722	-2.77054	-3.47555	-4.07711	-3.95489	-3.72486	-3.76955	-4.20809	-4.46398	-4.19529	-3.03724	-4.33422	-4.41395	-5.53863	-4.34366	-5.79176	-5.12817	-5.3164	-5.44252	-5.01191	-4.70435	-3.34883	-4.06142	-4.97623	-3.77355	-4.81255	-3.92318	-3.39439	-3.29205	-1.55151	-1.52472	-0.194365	1.87722	3.23755	5.94236	10.0544	15.4039	19.5063
			-3.7583	-3.59354	-2.93291	-2.73337	-0.628724	-3.72668	-3.20281	-4.6758	-5.86945	-6.92812	-8.16992	-6.79956	-7.46135	-6.4171	-7.01987	-8.17448	-6.66344	-6.62714	-7.3142	-6.85441	-7.5893	-5.61707	-3.5899	-5.63333	-6.19592	-5.48559	-6.81456	-6.66004	-8.24248	-6.11058	-5.3563	-0.89353	-5.80161	-5.29022	-3.40168	-4.1324	-7.06453	-7.8104	-6.10074	-4.79819	-7.60547	-1.32545	-2.50783	-0.882248	-0.464368	2.35426	3.19355
			-2.35278	-4.67959	-5.70532	-8.14211	-4.51634	-6.00191	-5.9341	-5.64366	-7.67351	-7.09335	-8.60897	-7.08457	-7.73157	-9.53084	-9.61458	-8.24594	-9.48108	-8.24913	-10.5005	-8.3379	-7.83348	-8.98032	-8.32999	-7.98707	-11.2546	-10.6527	-8.17667	-9.50662	-11.0189	-12.7206	-9.51202	-3.36343	-2.07445	0.79345	-0.217564	-3.83042	-0.659885	-1.65025	-1.23566	1.56004	2.42296	1.84929	4.06754	7.08144	6.73904	8.24481	11.6799
			-7.75904	-8.13837	-7.70062	-8.52156	-7.40308	-7.55143	-10.4045	-6.79278	-8.73072	-17.0093	-10.3215	-15.4834	-9.30226	-6.87656	-7.07839	-10.028	-8.28378	-10.4685	-7.02865	-10.3742	-11.9111	-11.6067	-13.0166	-11.9484	-11.7253	-13.0984	-12.9165	-13.2283	-12.2967	-12.9182	-9.20069	-9.41275	-10.6861	-8.1068	-8.3685	-8.32722	-11.3315	-10.8382	-11.6811	-10.6915	-9.0104	-8.90939	-5.24882	-3.062	-1.4799	-1.80138	0.259144
			-11.2014	-10.9543	-10.1013	-10.6213	-10.1314	-11.3506	-10.6223	-12.4387	-11.6349	-14.2453	-14.0431	-13.1794	-14.5666	-14.7583	-13.0775	-16.4434	-15.7369	-15.9468	-16.7	-15.7887	-15.893	-13.4069	-15.0583	-12.5352	-13.5545	-12.7857	-12.6449	-11.1804	-14.4009	-12.9102	-10.512	-8.51162	-8.59579	-8.12626	-3.17196	-4.72532	-5.01295	-5.4107	-2.85208	-3.53137	-2.91217	-2.20199	-0.0321489	0.339126	2.65287	3.62036	3.42634
			-6.88498	-6.00932	-7.41984	-6.14013	-7.27399	-10.256	-10.3886	-11.7085	-9.45723	-11.2374	-11.4596	-9.54561	-11.8981	-11.9581	-13.052	-13.3066	-13.3822	-15.3283	-13.8348	-14.5387	-15.2514	-16.354	-14.3439	-12.8931	-13.5708	-13.7974	-10.8738	-11.4375	-11.4867	-13.5844	-10.4478	-8.2373	-7.92019	-8.99509	-7.1198	-7.66547	-9.35204	-11.0682	-9.83961	-9.57862	-6.83894	-6.10515	-3.79664	-2.92533	-1.38516	2.37869	2.40986
			-9.06685	-8.93471	-8.83181	-10.9236	-9.85645	-10.4316	-11.382	-9.79772	-10.8919	-10.9563	-10.9724	-9.93582	-9.91938	-9.45623	-9.9936	-10.2999	-9.71889	-10.883	-8.50299	-8.58751	-8.63716	-10.6102	-9.89691	-11.8582	-8.87552	-9.44457	-10.1512	-9.67965	-7.01186	-9.637	-6.64642	-1.91995	-1.7745	-2.91888	-0.874328	-2.54088	-1.22673	-3.97855	1.95161	2.63584	3.02961	3.07565	5.41612	7.63132	8.91865	9.67707	12.5754
			-7.71348	-5.24339	-5.6	-5.98017	-5.68149	-4.16085	-6.61243	-7.07809	-7.74921	-6.41445	-7.95237	-9.44292	-9.30387	-6.87109	-10.0519	-7.67053	-7.73365	-6.92028	-8.65705	-7.63273	-7.9656	-6.66891	-7.13001	-7.3945	-7.39522	-7.08457	-7.09113	-6.94814	-7.77703	-8.58425	-4.93348	-2.45386	-3.07404	-1.21763	-2.18802	-1.32631	-3.41895	-1.12198	0.544537	2.09215	2.15066	0.186959	3.52005	3.11189	6.65476	6.05116	7.32606
			-11.7475	-14.1665	-13.7902	-13.936	-13.9734	-14.0489	-13.7291	-14.0154	-12.697	-13.124	-13.5	-15.2295	-14.4157	-15.2726	-14.3399	-14.5248	-16.4718	-16.6726	-17.3862	-17.7203	-17.1349	-16.8277	-18.2404	-17.6277	-20.2824	-19.0639	-20.8599	-21.9342	-23.1247	-23.5729	-20.675	-18.65	-17.4437	-18.3705	-17.7024	-19.354	-17.2422	-16.9249	-15.2558	-12.8458	-10.5903	-10.0812	-9.09351	-7.10463	-4.43609	-4.78881	-2.78468
			-2.97959	-4.28309	-3.31477	-3.64136	-4.79679	-3.23451	-2.2167	-2.88244	-4.33373	-4.65747	-4.35371	-2.54817	-2.48246	-3.61383	-3.41314	-3.85607	-2.54115	-3.97825	-5.39258	-5.61349	-4.83864	-6.17628	-6.28802	-6.41176	-7.51601	-6.927	-6.66899	-6.56409	-6.05226	-7.05762	-6.02011	-6.87181	-4.43233	-6.80908	-6.86733	-6.10179	-4.92546	-4.79433	-5.57942	-6.43249	-5.71631	-5.62548	-4.77697	-5.50045	-5.61877	-5.83572	-5.31336
			-1.54128	0.100495	0.210813	-1.05569	-1.16018	-2.60732	-2.20039	-1.18564	-0.133761	-1.11554	-1.53416	-1.35724	-2.16395	-1.98376	-3.44319	-2.04833	-0.856533	-1.53085	-1.246	-0.812881	-2.4968	-3.92339	-3.03562	-2.37982	-2.12008	-2.33147	-4.47094	-5.28837	-3.2578	-2.32884	-0.594345	-1.04711	-1.26536	-8.66353	-8.35406	-10.14	-9.77629	-7.41029	-6.51113	-7.51114	-5.09218	-3.01501	-3.01633	-1.46065	-3.18084	-2.32383	-1.78
			-6.57693	-6.80452	-4.89375	-6.25304	-6.02632	-6.87831	-5.92379	-5.12609	-7.86447	-7.13988	-6.37303	-7.09773	-5.8537	-7.00158	-6.12514	-6.20466	-7.12674	-5.37748	-7.4629	-7.78591	-7.42292	-6.986	-7.72651	-6.79019	-8.68065	-8.05298	-7.94329	-5.1329	-6.00755	-5.56684	-4.04363	-1.95896	-2.92593	-4.22987	-4.98517	-6.11959	-4.47119	-2.48956	-3.52852	-1.84617	-1.57792	-1.71394	-0.368447	2.29154	2.88856	3.23199	5.05267
			-1.18706	-2.57937	5.12198	-5.16417	-1.77226	-0.267094	-1.22096	3.08839	-30.8816	-2.82018	-2.52675	-3.1404	-0.686596	-1.70131	0.866791	-1.31305	-8.76895	-0.90311	-1.79559	-1.8634	-0.862042	1.36494	-1.20386	-2.21661	11.9599	-2.66404	-26.6598	-1.1581	-2.23391	-2.04868	-0.085759	0.891427	2.51128	1.29032	-1.97884	-3.43714	0.0329408	-0.355284	1.74146	2.18288	3.9302	4.27084	3.53339	4.14341	4.53163	5.32943	6.99089
			-1.13142	-1.80508	0.959704	0.159077	-0.321276	0.186153	-0.565393	-1.13057	-0.362872	0.548054	-0.304687	-1.30432	-2.26209	-1.29072	-2.90952	-1.1418	-2.96013	-3.59709	-3.27113	-2.35998	-2.51251	-2.8457	-2.94675	-3.06487	-5.67158	-3.39092	-4.09987	-3.89169	-2.39005	-2.45962	-1.04953	-1.65872	-0.225583	-2.18062	-2.9579	-3.1141	-2.04844	-0.773181	0.355803	1.73262	-0.0590545	1.9222	0.362792	2.04569	3.29452	2.5706	4.37626
			-1.68422	-1.01559	-0.0286595	0.00895289	0.560377	-0.0869556	-0.522435	-0.336087	0.281005	-0.00614172	-0.346145	0.0257287	0.488579	0.597819	-0.389602	-0.608539	0.849402	0.353861	0.317949	-0.270817	0.574098	0.0472487	-0.165335	-1.52962	0.591971	-0.0516583	-1.83105	-0.105406	-1.31166	-1.332	-0.524437	-0.894832	-1.21162	-2.02601	-3.38819	-2.97691	-2.35158	-1.51489	1.64507	1.1679	1.00958	2.87487	1.64745	4.05895	3.53446	5.29615	6.35191
			-3.74397	-2.89922	-2.33302	-0.730479	-1.31964	-2.71886	-2.22032	-2.60431	-4.26163	-2.51043	-4.37712	-4.33992	-4.90438	-3.90432	-5.36075	-4.87328	-5.63695	-5.35119	-6.2858	-6.95586	-7.15171	-6.9749	-6.73048	-7.67917	-7.09704	-7.05159	-7.27391	-6.53946	-5.85348	-4.74603	-6.95662	-4.91141	-6.36022	-8.77994	-7.34603	-7.68055	-6.52388	-8.24886	-9.41296	-7.26232	-7.21365	-7.04787	-6.76919	-5.22999	-3.6658	-2.24972	-0.0335721
			0.186742	1.05602	0.349166	0.860802	1.6914	1.17572	1.40639	1.43984	-0.638774	0.989536	1.96082	1.88178	1.21163	1.22752	1.52508	2.70555	2.43851	3.13657	2.21678	3.1056	1.44105	1.47558	0.303748	1.52027	2.41995	1.52141	1.31208	0.998382	1.47328	1.18693	0.675858	1.50002	-2.54882	-1.39554	-0.0124731	-1.216	-0.531563	-0.0152448	0.779852	3.07599	1.8612	3.1088	3.19384	6.12545	6.41773	8.94343	11.1073
			-8.57985	-6.98125	-8.71182	-8.49068	-7.63556	-7.31416	-5.96452	-6.31048	-5.80845	-11.4261	-11.3166	-9.69917	-8.22513	-10.7973	-7.97056	-8.17914	-6.91256	-7.08955	-7.25891	-5.79656	-4.76149	-4.73401	-5.23007	-5.38639	-6.06853	-5.27029	-4.3207	-4.63878	-5.52896	-5.40235	-6.25504	-6.31304	-5.1237	-7.28112	-9.13632	-6.1212	-7.79735	-7.82129	-5.33862	-5.37253	-4.16333	-2.20348	-1.38058	-2.66761	-1.72173	1.17184	-1.13096
			-4.34393	-6.71226	-8.15665	-11.2224	-9.51448	-10.046	-10.487	-11.1576	-9.31923	-7.64604	-8.73383	-11.6352	-10.7254	-9.99215	-10.3007	-11.1615	-10.5021	-11.5251	-11.8092	-11.1878	-11.2626	-11.4954	-12.2397	-10.6615	-11.156	-14.3428	-12.8368	-13.5748	-12.9433	-13.5039	-13.2811	-11.1422	-10.2821	-10.9455	-11.6885	-14.7791	-15.0129	-13.7464	-11.0629	-7.98569	-8.13275	-7.83691	-6.01134	-1.71063	-5.13624	-1.34858	1.51165
			-2.78033	-4.05262	-3.55865	-3.44747	-3.81638	-5.04121	-4.40329	-3.95029	-4.38948	-2.60179	-4.16993	-4.4812	-4.99558	-3.29833	-2.76443	-5.18889	-3.89222	-4.21319	-4.27117	-3.88731	-2.9686	-4.32554	-3.03043	-5.178	-5.06423	-5.75562	-3.61989	-5.35841	-5.11374	-5.31852	-6.11767	-10.5672	-5.73599	-5.71041	-4.37047	-5.08113	-4.65868	-4.45923	-2.25497	-0.910064	-0.737806	2.60744	1.61978	4.06037	4.84453	6.68608	8.53435
			-2.58665	-5.05096	-4.40935	-3.4923	-3.96874	-3.76366	-4.60448	-2.96959	-3.20403	-2.45962	-3.31009	-3.42444	-2.38193	-2.50392	-2.97108	-3.99839	-3.16362	-1.70557	-2.88874	-2.70432	-0.710858	-1.39591	-2.75352	-1.44381	-1.27371	-1.36144	-1.81724	-0.272839	-1.42744	-2.08557	-1.70312	-0.973546	-0.0752536	-0.731594	0.235917	1.78402	2.65301	3.73051	1.40866	2.87217	3.55383	6.92021	6.91887	8.8085	6.81982	9.56373	10.5348
			-5.12851	-5.24429	-5.675	-6.90692	-6.56628	-8.13649	-8.20014	-9.73197	-8.93591	-10.4583	-10.3177	-9.43527	-8.19446	-8.78401	-8.19483	-6.38669	-6.37659	-7.47572	-6.67535	-5.15809	-5.43916	-4.20555	-4.44086	-7.40852	-4.58813	-4.21609	-4.75812	-2.4726	-2.14456	-3.10656	-2.59181	-4.65857	-4.80526	-2.06533	-5.60796	-5.34668	-0.743646	-6.3533	-7.67754	-5.84065	-6.1573	-6.31567	-5.51588	-6.2283	-4.30156	-0.270943	0.916859
	mean	1-3sessions	-4.17399	-4.34303	-4.5136	-4.54392	-4.31357	-4.71684	-4.26	-4.46889	-4.05192	-4.40776	-4.55303	-4.65116	-4.49025	-4.65184	-4.66912	-4.45958	-4.48444	-4.32738	-4.60892	-4.73183	-4.7522	-4.03805	-4.7131	-4.47177	-4.58883	-4.79214	-5.20849	-5.11586	-4.83568	-4.93397	-4.99385	-4.41796	-2.14545	0.111054	0.552019	0.778223	1.13441	2.05793	2.4668	2.7145	3.47321	3.61114	4.24545	5.04444	6.46757	7.88463	9.02838
	mean	4-10sessions	-4.29571	-4.4519	-4.3333	-4.46348	-4.45296	-4.60345	-4.69102	-4.48743	-5.04603	-5.00543	-4.87579	-5.02164	-4.99859	-4.95657	-5.07885	-5.19045	-5.10169	-5.10171	-5.28621	-5.09513	-5.19266	-5.07504	-5.29607	-5.34159	-5.10728	-5.48655	-5.77689	-5.4455	-5.703	-5.55011	-5.01411	-4.54993	-3.27667	-2.07624	-0.387202	0.253053	1.10196	1.68652	2.35202	3.28845	4.10029	5.18375	6.31243	7.99941	9.82284	11.5593	13.6248
[truncated: 129 more columns]

## Sheet: Fig 3f
		60 iti
		time	-12	-11.9	-11.8	-11.7	-11.6	-11.5	-11.4	-11.3	-11.2	-11.1	-11	-10.9	-10.8	-10.7	-10.6	-10.5	-10.4	-10.3	-10.2	-10.1	-10	-9.9	-9.8	-9.7	-9.6	-9.5	-9.4	-9.3	-9.2	-9.1	-9	-8.9	-8.8	-8.7	-8.6	-8.5	-8.4	-8.3	-8.2	-8.1	-8	-7.9	-7.8	-7.7	-7.6	-7.5	-7.4
		1-3sessions	-12.8584	-9.31774	-7.25388	-7.08349	-4.07214	-6.38037	-5.87705	-6.66484	-6.95699	-5.43125	-4.82109	-5.76276	-6.54223	-7.09134	-5.56232	-4.9716	0.655645	-4.30129	-6.30693	-6.2953	-4.79279	-5.71863	-4.08507	-6.52446	-3.3203	-5.12867	-4.00736	-5.813	-2.79394	-6.26035	-5.54302	-7.13501	-6.14144	-6.47807	-7.41484	-8.75376	-7.26214	-9.05292	-7.8702	-9.66582	-10.4266	-9.76711	-5.57984	-8.1551	-6.35371	-3.67246	-3.68774
			4.25142	4.85982	3.60419	4.664	2.43126	1.66154	4.52086	4.60282	5.1417	4.39335	4.59016	4.70424	5.48753	5.10075	4.37823	3.3041	3.08594	4.37847	4.48565	3.51761	1.11488	1.5689	1.79354	-0.143425	0.671485	1.43588	0.82512	-0.326782	0.021361	-1.9017	-2.13202	-1.95868	-1.76559	-1.15584	-1.39031	0.276474	-1.87814	-0.808704	-2.88509	-1.63772	-2.01911	-0.148417	1.83379	2.96712	5.33177	7.08371	8.22346
			-7.73159	-6.68523	-6.18225	-8.17373	-8.19245	-7.59598	-6.97636	-8.46988	-8.76931	-9.81701	-7.61821	-8.56767	-6.61548	-7.74558	-8.33316	-7.56527	-7.41137	-7.91051	-7.11394	-7.78839	-8.63683	-9.30733	-7.81255	-6.42143	-6.46991	-6.302	-8.88913	-7.44834	-6.29123	-6.49883	-9.24964	-8.59493	-8.63004	-10.4448	-7.75426	-7.74086	-9.73453	-9.26586	-10.4274	-9.28899	-8.04706	-10.8042	-4.596	3.31553	1.70933	6.24231	8.66819
			-1.50326	-2.15958	-4.46441	-2.64149	-1.54565	-5.48296	-0.55975	-3.36112	-4.90822	-4.6607	-9.18661	-8.6982	-6.52381	-8.58682	-3.50116	-7.39818	-2.88022	-2.8202	-6.88901	-9.73535	-2.61326	-4.47859	-7.57141	-5.38982	-7.38137	-4.18719	-4.25569	-3.65017	-2.09854	-3.87445	-2.98524	-5.30671	-6.00745	-3.86102	-4.15832	-7.13436	-6.0565	-1.83473	-0.151702	1.4079	1.40092	-0.780892	4.21478	10.8305	9.82833	9.39642	13.0868
			5.70898	8.50547	5.13788	7.29407	8.27555	3.02259	1.93475	5.48645	5.47642	4.4085	2.86745	2.23227	-0.117231	3.34922	2.41452	1.93327	1.68464	5.2697	3.26658	2.53196	2.29756	0.938893	2.60976	-2.05033	-1.14391	1.77948	0.377069	1.02191	3.39776	1.58625	3.78273	3.18078	4.4763	4.56831	1.68075	7.76536	7.97739	5.21637	3.99371	2.95008	2.94791	3.99477	10.5256	18.148	20.7361	22.2514	26.1011
			-2.60875	-1.85404	-3.3146	-3.5636	-1.08153	-2.55615	-0.66868	-2.22354	-2.84095	-4.96864	-3.36718	-5.52299	-3.44147	-3.95035	-5.1147	-6.44087	-3.35467	-7.33755	-4.4767	-3.72917	-2.53225	-6.213	-3.2839	-5.83401	-1.42474	-3.40572	-4.9114	-7.32907	-5.4328	-1.69505	-3.93852	-2.80069	-6.38234	-5.94336	-6.50318	-6.43293	-6.4903	-4.39991	-6.28476	-7.89307	-3.26274	-5.04201	2.06887	5.99799	5.944	8.92724	13.5478
			-8.22107	-6.86191	-7.14065	-5.099	-6.00705	-5.26049	-5.78009	-7.07873	-5.89178	-5.81477	-6.15907	-4.68075	-4.51734	-5.73844	-6.50962	-5.39258	-6.06334	-5.2017	-4.90129	-5.76179	-5.5439	-5.2193	-4.8573	-5.45291	-4.28341	-3.98238	-7.47254	-7.01378	-8.62042	-7.02373	-7.63975	-7.81987	-8.03909	-6.05686	-7.8469	-7.97439	-8.41299	-7.2636	-8.10914	-8.24669	-8.01306	-7.04712	-6.70105	-8.33804	-3.23114	-0.104175	2.03881
			-4.09969	3.72555	6.18018	3.47447	4.54721	2.0257	-6.25236	-5.89132	-0.00931338	-3.44115	-3.81331	10.5628	10.7894	0.852699	-1.19558	-1.93027	-2.54648	-3.54778	-3.73458	-4.12306	-3.57971	-5.66339	-6.48148	-7.06035	-5.90345	-5.85349	-8.17823	-7.49351	6.2071	0.956219	0.146259	14.3593	-6.2609	-6.9119	-7.00493	-7.1889	2.85989	-3.97125	-5.67813	-5.70059	-3.69063	-2.73786	-2.48534	0.346621	-1.57724	-0.504014	3.38819
			-1.25004	-1.99971	-0.911723	-0.896998	-3.10755	-2.05819	-1.25795	-3.0106	-1.13398	-3.40038	-3.02192	-3.99534	-3.01585	-4.29503	-3.42528	-2.6139	-1.50017	-2.58078	-2.56751	-2.97485	-2.91832	-3.25831	-4.03058	-4.79878	-4.12578	-2.82024	-4.77283	-5.58123	-5.94608	-4.8133	-4.76998	-5.14241	-5.5522	-5.44335	-7.00288	-5.45383	-6.10568	-4.27766	-4.38482	-4.35327	-4.63932	-1.46328	-1.71306	2.15383	-0.42714	0.244397	3.79181
			2.79597	0.541341	0.855067	2.50116	2.98845	1.85901	3.7496	2.53208	5.32467	5.64975	6.57809	4.41544	3.4894	4.61852	5.07226	4.43642	4.07239	6.30063	5.49297	3.70757	4.60286	7.07354	5.68213	6.50237	6.78549	6.92905	8.09846	6.54597	5.11425	7.31917	6.53242	6.73342	9.72723	5.12153	10.3162	7.84825	6.10169	11.7562	7.67498	7.37747	13.6188	10.9811	8.19129	8.35629	9.59022	5.09717	7.96868
			7.50547	6.16289	6.75276	4.36974	6.28716	6.40754	9.01772	5.20043	6.56244	9.75227	5.81381	8.03683	5.22591	4.88003	3.44848	2.91587	3.41995	2.70937	5.99879	2.9099	4.36852	4.15015	5.9933	5.62781	3.94681	5.02333	8.12131	7.569	5.85051	6.39706	5.58583	4.24273	7.27621	5.3799	6.75087	6.78985	5.73897	3.50421	4.3793	5.16002	5.2585	3.5664	0.590663	0.560971	2.23262	3.43275	3.41107
			-10.2735	-10.0057	-13.2233	-12.6118	-16.0737	-11.9493	-12.2279	-11.8233	-13.393	-12.8071	-13.6132	-15.6527	-12.788	-12.8904	-13.9218	-14.1539	-12.7136	-14.1584	-14.7947	-13.0982	-15.9274	-14.5783	-15.4051	-14.1539	-15.693	-14.2525	-13.5075	-14.4561	-16.1545	-17.3093	-15.2704	-18.0765	-16.8065	-18.5577	-19.5143	-17.5847	-20.6252	-15.8394	-21.3485	-18.2478	-22.3801	-22.4208	-16.8493	-20.2914	-19.6844	-18.6115	-17.8593
			-5.09193	-1.0615	0.880395	-1.28084	-5.21266	-4.88087	-5.12186	-3.84972	-4.97554	-4.19751	-2.81505	-3.41567	-4.01708	-3.36197	-2.49846	-2.50905	-0.0148032	-1.4981	-1.37388	-2.50074	-2.17378	-1.70483	-2.76225	-2.31169	-1.40449	-1.32175	-3.02216	-2.09657	-1.70438	-2.24641	-1.29616	-1.37825	-3.88193	-2.03271	-0.980187	-3.60426	-2.06932	-2.35687	0.942009	0.960223	-2.34591	-0.453831	1.89719	7.11012	11.3234	13.9225	13.5195
			-6.66182	-5.30836	-3	-6.08293	-3.62454	-4.33022	-4.60496	-6.601	-6.90324	-8.38784	-7.8834	-9.59562	-12.2655	-9.30066	-8.53913	-7.77406	-5.15656	-4.16486	-2.91642	-2.91253	-2.19798	0.378642	-0.311968	-0.527415	-0.906696	-2.40478	1.31002	3.52698	0.726191	0.0216854	-2.17462	-0.462564	-2.30035	-1.2679	-2.14423	-2.98933	-4.01956	-6.75109	-7.60711	-6.52679	-6.20093	-12.6107	-7.37781	-8.69657	-12.6349	-11.6452	-13.7661
			2.59665	2.45752	2.53671	2.12471	0.101929	0.71349	1.11678	2.23855	0.810596	-0.118565	-1.71926	-1.38696	1.33655	-1.07162	-2.97602	0.149022	-1.91053	-0.085261	0.206838	-1.14051	0.0326924	-0.256722	-2.23128	-4.20766	-5.19919	-3.36881	-2.39932	-3.08051	-6.44166	-2.70079	-3.61108	-4.48568	-4.09065	-1.53356	-1.54376	0.0723006	-1.42311	-4.37194	-0.6103	-2.62535	-3.48537	-4.47583	-7.07655	-1.44834	4.55338	4.53963	5.69049
		4-10sessions	3.03412	4.85672	2.59139	2.00611	2.24218	2.50116	4.03752	2.61037	-1.10545	2.77853	0.0526276	1.03431	3.52344	0.896804	2.95648	2.6348	1.02117	-1.67518	0.34358	-0.505468	-1.90932	0.678998	2.23568	0.526117	-0.541399	-2.9928	0.447364	0.721972	2.49167	1.80443	-0.00919252	-2.34577	2.68923	-0.320394	-2.21457	0.0382253	-2.07904	1.81295	0.408827	0.630436	0.599204	-1.51579	2.06312	6.29273	9.90876	18.8096	14.1331
			-1.24093	2.51332	4.26291	3.22328	3.96247	2.21226	3.75924	3.87387	7.05382	4.86358	9.85957	4.85931	3.58949	3.13049	2.0429	5.64104	3.96871	4.45933	1.6676	1.25948	1.05627	0.969826	2.54015	0.299834	-0.61063	0.252178	3.06359	1.47009	0.680192	1.78176	-2.08603	2.67311	2.33497	3.0428	0.588778	2.19507	-1.19977	-0.829263	1.66276	-3.02424	0.333693	7.95544	2.71076	10.8067	16.1212	18.1413	14.9272
			5.74314	4.88555	3.15805	3.57927	3.70291	4.30541	7.04895	2.38614	0.437194	0.850285	1.8872	1.55478	3.70194	2.85017	2.03167	-1.40596	0.144361	0.262743	-0.187826	0.302686	0.827726	-0.435405	-0.262905	-1.35586	1.39159	0.188199	1.44993	-0.36359	0.565232	1.03169	0.173189	0.144503	1.28567	0.894507	2.47018	1.29113	2.36159	-0.0955094	-0.298898	-1.28823	-1.32844	-7.32937	0.891753	11.0598	9.64868	18.2022	20.7259
			3.71934	-1.59523	0.854552	-2.53968	-4.5346	-0.634164	1.29163	1.57716	1.34868	5.07767	3.67011	2.66452	3.44306	1.61804	4.30521	2.15655	1.7065	2.01865	2.93592	1.42798	6.28272	2.13863	2.84696	8.77079	2.37519	2.71799	1.409	4.01171	2.71155	0.576415	0.663825	-1.04049	3.3326	0.127528	7.01089	3.63418	7.91789	3.16168	3.02203	1.90871	1.40382	2.9326	4.86089	13.2738	17.6503	22.4572	26.3025
			-6.00207	-8.51133	-6.33731	-7.96502	-10.3036	-10.0374	-11.2229	-13.1299	-11.0832	-7.86726	-10.0809	-14.1314	-8.12285	-10.8597	-11.1385	-12.5202	-6.52106	-9.40345	-9.13808	-10.4479	-7.32997	-9.74103	-9.95438	-10.3148	-4.31279	-7.29507	-6.0104	-4.32443	-3.69183	-5.87336	-5.39818	-8.72316	-13.8124	-10.2412	-5.48619	-6.64752	-7.32145	-10.7449	-5.77696	-3.39516	-6.87569	-9.49654	-7.47316	-0.744589	-2.43268	0.383613	3.93773
			-5.94166	0.32431	-4.22973	-2.0245	-4.2383	-0.988307	-3.24312	-4.0936	-4.37479	-4.9477	-7.04384	-7.02687	-7.56059	-5.02515	-5.66322	-3.56835	-7.46939	-4.64693	-7.73431	-6.88891	-4.76214	-1.90271	-0.275031	-2.17297	-4.36562	-2.32248	-5.02743	-4.53262	-7.44628	-3.74675	-7.96805	-10.0486	-3.07907	-11.0359	-4.94985	-9.42893	-7.86986	-10.7043	-13.1738	-7.09847	-13.5375	-4.748	-4.65022	-8.73701	2.91586	4.58138	12.9616
			2.0829	4.79856	2.79187	3.34833	4.81317	4.74432	3.0736	3.66483	2.25623	2.94188	2.70887	3.64951	3.441	1.48014	3.18559	2.06533	3.67068	2.78567	1.30061	2.25533	-0.683468	1.37403	1.46654	0.796085	1.83495	-1.60421	-0.405767	0.218893	0.166319	-1.57616	-0.326518	-0.230619	-0.87274	-0.20596	-1.03919	0.121302	-2.55861	0.86007	0.378801	-1.87844	-1.45883	0.234117	0.453728	6.43985	9.02063	16.6575	19.1749
			-5.02046	-4.47958	-4.9416	-4.52401	-4.37022	-6.61806	-2.23268	-4.53507	-6.49113	-4.95249	-4.31947	-5.21861	-4.39615	-7.34672	-6.25926	-7.37486	-8.66062	-8.58563	-8.07018	-8.05462	-7.16705	-9.39153	-8.55467	-7.85392	-9.00034	-10.1065	-9.17168	-7.92733	-7.47888	-8.48326	-8.68657	-8.27169	-8.12095	-9.40126	-10.6599	-6.8399	-9.68676	-8.57336	-8.2813	-9.1268	-7.21532	-6.234	-6.90247	0.652464	7.30694	11.7319	16.689
			-7.16806	-5.76526	-5.77516	-4.03391	-3.76803	-3.37731	-4.5651	-4.74649	-5.76406	-5.48244	-3.88132	-2.93192	-2.15652	-3.09551	-3.48889	-3.21694	-5.18718	-4.56526	-5.87566	-5.65389	-6.09968	-7.45053	-8.56245	-8.52642	-7.20707	-4.44471	-7.84757	-4.84459	-3.77624	-5.69968	-0.563289	-6.0754	-5.99346	-5.55553	-3.10017	-4.84903	-4.11234	-3.94711	-5.58066	-4.78115	-5.48024	1.25159	5.52794	6.96045	9.14421	13.4351	11.3841
			-2.71177	-5.77449	-2.0847	-3.68844	-7.45152	-3.36355	-3.5826	-6.64268	-4.01834	-4.96776	-2.01317	-8.66998	-5.57691	-5.10311	-6.83376	-8.43273	-6.17685	-7.56547	-7.06899	-6.92147	-7.50676	-6.52731	-11.0412	-5.76087	-7.23135	-9.51846	-10.6888	-10.283	-9.24415	-8.62391	-8.00781	-11.4463	-7.76755	-8.54944	-11.5688	-8.5714	-8.45167	-10.0836	-9.15239	-10.123	-10.3624	-6.49433	-2.81853	6.73682	12.6158	13.1376	16.0941
			3.51026	2.59827	1.193	0.594038	0.953237	1.88726	3.74646	-0.723616	-2.29374	3.56929	1.68099	1.31012	1.13877	1.81148	2.00669	-0.306647	-0.560826	1.22676	1.95654	-0.326952	-0.67668	1.80067	-0.359121	-0.574636	-1.9012	-0.788405	-2.91819	-1.88743	2.20279	0.0294334	1.74482	-0.881458	-1.77671	1.81861	-0.0876874	-1.28779	1.8732	1.43453	-0.000638937	-1.18576	1.66165	3.25748	5.66153	12.1135	17.4657	20.4072	25.2326
			0.867655	0.10065	-1.36469	-3.04846	-0.780531	-3.28564	-0.570695	-2.45175	-3.76914	-2.64055	-4.34778	-5.2885	-2.41803	-1.57869	-2.8916	-2.97681	1.18898	-1.0607	-2.01728	-2.06398	-1.94466	-4.34421	-4.67717	-2.70876	-1.78234	-3.43421	-1.12214	-4.02583	-3.8675	-5.8241	-6.24529	-6.33712	-3.98816	-4.76131	-7.14925	-5.85695	-1.97307	-0.723737	-3.98085	-5.00022	-2.08074	-4.36539	0.873005	3.89721	8.28873	12.3076	11.4587
			-1.79608	-4.79273	-3.46607	-0.481299	-1.9869	-5.35884	-1.99494	-3.37527	-2.18469	-3.35133	-2.90514	-2.55754	-1.1048	-3.50206	-1.57814	-1.79028	-0.478361	0.066435	1.26675	-0.567944	-0.329324	-0.645804	-2.55916	-4.61869	-2.64744	-3.08651	-2.21374	-4.73813	-5.68049	-1.52321	-0.75442	-4.40185	-4.90183	-5.69139	-1.89165	-5.98318	-4.60694	-3.65469	-3.62141	-4.1057	0.560656	-0.605833	3.27841	8.09101	15.0338	20.7626	21.3444
			-6.68907	-4.07994	-6.78039	-4.14153	-2.9058	-3.85719	-4.00709	-1.56336	-2.47889	-1.52635	-0.603851	1.55192	-0.615318	-3.31269	-1.09937	-3.93311	-4.34217	-5.01977	-4.15371	-5.031	-5.65986	-5.17974	-3.54266	-5.86382	-2.14814	-6.24266	-5.8738	-7.25922	-7.29769	-6.29918	-7.6921	-7.22768	-6.40881	-7.79648	-7.73363	-7.39465	-11.1555	-9.42154	-8.08187	-6.14473	-2.68421	-3.27484	3.40452	8.8924	17.1185	16.8563	21.5392
			-3.0233	-4.18611	-2.06357	-1.02083	-3.44311	-2.18569	-3.85778	-3.92807	-5.98315	-3.52171	-4.07802	-2.91925	-2.12715	-3.42314	-1.19203	-1.00978	-1.42581	-3.64475	-3.69862	-2.23012	-3.82883	-3.2302	-4.82306	-5.15741	-2.76097	-2.03311	-6.48596	-3.55946	-3.53003	-2.28789	-2.47155	-3.12646	-3.66847	-4.49563	-2.5066	-1.51971	-1.79502	-2.71157	-1.80905	2.01278	0.0499148	4.70006	-0.943272	8.33832	10.688	15.4031	14.449
			3.77126	3.31893	3.4697	2.35382	1.93439	1.86633	1.24552	2.3479	0.858117	1.96783	0.859361	-0.0504914	0.495862	1.31049	0.947239	-1.31132	1.19068	0.818598	0.875688	0.88341	0.129651	0.749095	0.26163	1.52233	0.697842	-0.2706	1.61142	0.769394	2.25687	2.46174	3.52174	0.54762	3.04193	1.33985	2.42714	2.28559	2.73585	2.88513	3.51366	3.28896	3.88817	5.83645	6.53357	5.71729	5.65565	6.65248	7.615
			-3.92074	-2.97474	-3.52838	-3.93641	-1.79953	-1.92077	-1.74223	-0.959751	-2.9797	-2.35451	-1.61096	-2.33454	-3.64131	-1.65906	-1.59539	-2.94354	-0.818504	-0.225647	-0.959733	-1.78167	-1.84144	-2.23947	-0.186242	-0.414929	-1.72577	-1.6734	-0.00287214	-0.617802	-1.78004	-4.45979	-3.31194	-4.18612	-4.407	-3.60253	-4.26325	-5.45074	-4.04071	-3.8889	-4.22383	-5.59505	-3.61339	-3.70607	-4.23098	-1.20924	-1.77343	0.353803	-0.0346088
			-1.25909	-1.91663	-1.34403	-1.24236	-0.940798	-1.42708	-3.13045	-4.03025	-3.59514	-3.12237	-3.64111	-3.42452	-3.26914	-3.19758	-1.11919	-1.64706	-1.14408	-1.77699	-1.06021	-2.16658	-3.15072	-1.97043	-3.48391	-3.57259	-4.10753	-2.8287	-3.0267	-3.04634	-2.53512	-3.22173	-2.0859	-1.42471	-1.86577	-1.77462	-1.2727	0.638087	-0.163077	0.404735	2.85978	1.5324	3.11593	4.42843	5.06488	3.85883	6.86977	7.53933	6.6297
			-6.38154	-5.81416	-3.46566	-4.95638	-6.22169	-6.70192	-5.19607	-6.45885	-3.2307	-3.91482	-4.05186	-4.589	-4.49766	-4.47812	-3.66312	-4.95689	-3.41427	-4.89854	-3.89679	-3.49561	-4.00567	-4.85194	-6.03697	-5.27946	-3.5173	-4.35969	-5.65549	-4.11382	-6.08736	-4.78509	-5.64775	-6.53373	-7.6296	-6.75432	-5.44117	-5.11043	-4.19224	-6.19348	-5.594	-6.21917	-3.69653	-2.10535	-3.36928	-1.5038	-1.80875	-2.94427	0.084514
			-0.99022	-0.587988	-0.777538	-0.627695	-1.37707	-1.50475	-0.311433	-0.33125	-1.35102	-2.74435	-2.2783	-0.842984	-1.77265	-1.44414	-1.9793	-2.07746	-0.305438	-2.02256	-2.12193	-2.55825	-1.3763	-1.91997	-1.57321	-1.90245	-1.66377	-1.61477	-3.19424	-2.71169	-3.05297	-2.93827	-3.47166	-3.82717	-2.79404	-4.46219	-4.62898	-2.39148	-4.87492	-3.71942	-3.47377	-4.54344	-0.281168	0.106804	0.471418	2.53785	1.53956	1.72416	2.9243
			-4.48974	-4.18348	-3.66576	-4.80396	-3.53868	-3.99749	-5.59468	-4.02816	-4.66221	-1.65192	-4.36589	-5.65717	-4.13436	-4.71333	-5.26104	-4.04698	-4.73605	-5.46829	-2.95578	-6.58457	-5.36273	-4.16048	-4.55032	-4.80923	-5.30465	-5.06264	-6.15455	-4.95594	-6.37897	-6.78595	-8.31606	-5.46429	-6.74476	-6.10317	-7.69474	-6.19124	-7.21219	-7.34101	-6.80166	-7.25762	-5.22799	-6.1489	-3.06326	-4.39585	-3.76816	-5.19106	-3.80713
			-4.68108	-5.87367	-4.34152	-6.24622	-2.88603	-6.25233	-4.59839	-4.97889	-4.80724	-6.03651	-4.85473	-6.10047	-7.55886	-5.55839	-6.46036	-5.02338	-6.28724	-6.30812	-6.23308	-6.50586	-5.82608	-6.80582	-7.75778	-8.97948	-7.47008	-8.6602	-7.64162	-6.17904	-6.67999	-6.61268	-7.21231	-7.28818	-6.46112	-4.4532	-5.95147	-5.28852	-5.31313	-5.27032	-6.50768	-5.75783	-5.62973	-1.41422	-3.1413	-1.04304	-2.86271	-2.18152	-2.28469
			-6.40628	-5.21255	-7.63052	-9.08893	-6.83399	-5.65679	-6.06745	-7.20264	-6.31644	-4.55465	-5.12232	-5.08861	-9.86874	-8.91465	-8.45041	-7.49424	-7.73262	-7.8025	-3.68826	-5.721	-8.79704	-8.07942	-7.08245	-10.0407	-5.49525	-1.23117	-6.15021	-6.20403	-2.92696	-4.50071	-6.00794	-9.06688	-4.58118	-6.22957	-1.83404	-4.82389	-9.13112	-7.41413	-7.43903	-5.56708	-5.42715	-13.1513	-6.71639	-2.79103	1.34065	11.6628	3.75673
			0.503427	-0.299797	1.58144	-3.03557	-4.8394	-1.76993	-3.12456	0.057876	-2.64301	-1.63681	-1.9495	-2.725	-2.42729	-3.08486	-4.24418	-3.15946	-5.32752	-3.66755	-3.96461	-2.33183	-6.07943	-5.30331	-4.86545	-2.70814	-4.64031	-5.24596	-6.9693	-7.89011	-6.9631	-7.77738	-10.3579	-5.14127	-7.77334	-8.90364	-5.10355	-5.36643	-5.39646	-5.76615	-5.23966	-4.4738	-3.82854	-6.78665	-7.98376	-2.94448	2.55039	4.66087	7.23236
			4.19755	3.33714	-1.99413	-2.92521	-2.21604	-6.4591	-7.02435	-11.076	-7.65562	-8.96901	-9.59322	-10.0248	-6.8461	-10.1019	-7.58111	-6.32042	-6.1363	-7.20605	-11.442	-11.538	-10.6989	-7.88807	-3.62237	-5.90768	-8.11451	-10.4026	-12.837	-8.64537	-10.5185	-9.36355	-7.83989	-10.6022	-12.7376	-14.8985	-13.1332	-14.153	-18.2596	-18.674	-14.8561	-17.3447	-9.7488	-17.9987	3.04449	-4.99975	1.98581	-2.4781	7.12701
			-9.86322	3.67851	-1.97874	-0.156353	-5.26221	-16.3054	-0.891607	-0.556238	-1.88395	2.27585	-2.51993	-6.93802	-1.01018	-4.05229	-5.50335	-3.07322	-16.2678	-7.25037	1.43473	-11.4261	0.089141	2.02207	-6.95931	-6.78498	-4.89541	-0.510559	-3.22446	-5.94146	-6.26104	-6.2714	-6.68998	-13.4306	-4.36144	-4.12588	-3.79468	-8.10216	-10.0829	-9.39792	-10.8017	-9.17823	-6.73755	-9.99505	-9.22374	-1.22543	-6.54119	-7.06741	-1.86188
			-1.63268	-1.94019	-3.04201	-1.83888	-1.46829	-0.336892	-1.81416	-0.58298	-2.77845	-4.31606	-3.11291	-2.47523	-3.11544	-3.1359	-2.74632	-4.05211	-3.34683	-2.50393	-3.10939	-1.35645	-2.73171	-2.63838	-4.31694	-5.60869	-2.3178	-2.23325	-3.09195	-1.21602	-1.35126	0.469861	-0.661111	-0.580514	-2.08932	-0.675482	-0.47263	-2.39007	-3.1105	-3.0139	-3.28305	-3.78443	-2.79429	-9.44262	-8.31313	2.21043	1.04046	-2.38964	-1.69838
			2.02342	-8.45392	2.7869	3.94631	0.605406	1.77494	0.698282	-5.237	2.69129	7.13071	0.126779	7.0051	7.97906	1.57347	1.63	-7.18226	4.88989	7.3922	8.74013	5.57263	7.25102	5.60579	0.66631	-2.97587	3.91178	-1.21854	6.15025	4.57391	-10.0075	0.157074	3.22745	6.68439	11.2741	1.35705	4.70731	0.654209	-3.55022	0.648208	3.15234	0.66396	4.5862	3.11348	12.1652	2.88442	4.229	2.43403	2.54595
			6.09652	2.5539	2.60431	2.79677	0.132514	0.0086305	3.60423	4.7785	2.51081	1.07502	1.89639	-1.85466	3.10896	3.5819	5.10136	0.522333	-1.64959	5.08274	8.96971	-0.545623	4.64796	1.0814	2.15455	2.23522	1.10089	-0.113883	1.4688	3.04306	2.7409	3.29935	1.4603	1.8351	3.16179	2.49435	2.74632	1.55804	4.81755	2.49915	-2.67524	5.09915	21.8027	3.45505	-2.67554	10.3603	9.25772	3.95486	5.00375
			-3.10253	-4.86174	-0.269932	-5.83161	-7.54	-5.36525	-4.3168	-3.48634	-3.59	-3.63273	-3.50568	-1.46842	-1.67736	-5.34978	-4.89586	-5.03468	-0.910614	-5.06593	-1.86537	-4.46319	-1.69463	-2.01754	-2.85565	-0.689729	-1.09492	-3.13933	-0.31754	-4.89359	-2.24099	-2.52633	-1.17018	-0.180842	-1.56533	-1.32285	-2.74715	-2.36646	-4.98509	-3.22027	-4.03707	1.49448	-1.65125	0.829366	1.58018	-0.363067	-0.444031	-0.918311	-1.39613
			3.92912	4.93309	7.51635	3.9225	3.39071	5.62689	6.442	4.41322	4.11955	5.25612	3.63242	3.24344	3.88505	1.76991	5.37991	2.68919	5.14215	4.87678	3.92117	3.5675	6.54442	7.83879	4.20455	4.38867	6.71224	2.94909	2.05806	5.49563	5.34276	7.77906	5.27714	5.69594	3.91615	4.75749	4.96472	5.47288	5.87663	2.03771	5.56368	7.42933	7.53827	5.2678	7.94494	6.29548	6.32656	6.43315	4.19763
			3.39271	0.298829	2.10134	0.643442	1.51515	2.63204	1.48675	0.656251	1.23768	1.25815	0.386849	-0.101291	1.45048	1.87362	1.14911	1.80418	1.25136	-0.929772	-0.104118	0.324418	1.47642	-2.03788	0.184887	-1.71412	0.160018	0.835593	-0.0187044	1.09421	0.548254	-1.27524	1.0985	-0.720216	1.5806	-0.723362	-0.321359	0.991697	-0.493781	0.0991998	-1.357	-0.964018	-2.1644	1.80445	1.29023	5.5847	-0.200154	2.02679	1.84017
			-3.60581	-7.80261	-3.64399	-2.54161	-3.82893	-4.92529	-4.59616	-3.89468	-5.77796	-5.29266	-5.53402	-3.66587	-3.7259	-2.27929	-3.03564	-4.11845	-4.32748	-3.63171	-4.04369	-3.63616	-2.98266	-6.54944	-5.84763	-5.03598	-4.95142	-3.99164	-5.00618	-2.88736	-5.86143	-5.61287	-3.67835	-3.70314	-5.76706	-5.80358	-4.72647	-4.95346	-5.60184	-6.70041	-6.24834	-7.21641	-7.05419	-5.45902	-9.32344	-6.699	-6.41574	-4.36041	-6.28516
			-6.40754	-5.52466	-7.36282	-6.48306	-5.71839	-4.53083	-6.31361	-3.64494	-7.42426	-7.09998	-5.81624	-4.96247	-4.77388	-6.0684	-6.39758	-6.11714	-7.2813	-8.19628	-7.59502	-8.4324	-7.03316	-6.22879	-7.02808	-5.6365	-9.4556	-6.16898	-6.07368	-8.16923	-7.16851	-6.76735	-6.35052	-8.45233	-8.24019	-10.2301	-9.24193	-5.51714	-9.5934	-9.42828	-8.35367	-8.84245	-9.57816	-12.8736	-5.06331	-8.3844	-6.70128	-7.09497	-8.34953
			-0.507908	0.960246	-0.323126	-1.20307	0.821555	-0.52837	1.60226	1.43102	-0.447942	-1.53058	-0.218761	-0.621038	-1.52937	-1.18799	1.86012	-0.733739	1.10401	-0.705454	0.0917941	-0.157008	-2.17139	-0.165106	-0.272996	0.984773	2.56019	1.46277	0.18616	-3.70407	2.80233	-1.30301	-0.749788	1.11073	2.86945	0.372832	-0.417825	0.453141	0.616098	0.899911	-2.47523	-0.918332	-2.52013	-6.13008	-0.128745	-2.86748	-3.11639	-4.11882	-1.35934
			-3.92886	-4.42749	-3.14986	-2.45315	-6.10146	-6.35855	-2.81792	-5.0248	-12.6249	-2.93238	-3.72228	-4.97647	-4.42703	-5.07089	-5.47389	-5.50955	-4.30193	-1.41792	-3.4721	-5.03693	-1.6766	-0.394199	1.96658	-4.13213	-7.15092	-2.77277	-8.72121	-1.48858	2.27637	4.83124	2.6662	1.63967	-1.66417	-6.65385	-5.43781	-5.14695	-4.59752	-6.29523	-6.64581	-6.41657	-3.65312	-10.1748	-1.23253	3.3025	-2.20358	-6.64354	-5.88465
			9.90648	12.072	10.5902	12.1672	13.1541	12.1894	11.8229	11.5514	12.463	13.2276	13.0321	12.2805	11.9576	14.3887	12.5974	12.4776	13.5485	12.9375	12.5934	13.9736	15.4372	14.8126	16.6046	14.3624	13.4461	13.9427	13.4974	12.2094	15.3905	15.5718	14.6075	16.5389	13.0369	16.1813	16.0226	12.639	14.7587	15.9001	16.1964	16.4459	12.8488	10.4993	13.6494	12.8175	13.9856	13.0066	15.4985
			2.88151	9.98447	3.78781	7.06147	2.15804	-0.243745	-1.54699	4.0306	-4.00829	-0.123861	-0.46326	-2.43695	-0.271733	4.40165	0.0420432	3.95082	0.852867	4.80558	2.07874	3.10156	2.59011	2.80069	1.03708	-0.386381	2.45528	2.48507	-0.0246982	-0.967287	-1.33803	1.48672	0.409346	0.362448	0.490546	1.04898	-1.47243	-0.953264	-4.8957	-3.6511	-2.22666	-1.93467	-1.36272	1.91421	0.517356	4.21413	-6.84892	-0.872861	-2.04689
			-7.4194	-7.69146	-8.3534	-7.13145	-8.40052	-9.75004	-6.60102	-6.99286	-6.97887	-8.78835	-9.40545	-10.5481	-8.84098	-7.58665	-9.97456	-10.8255	-9.53007	-12.9902	-14.6387	-13.2584	-13.9114	-14.1707	-16.3158	-9.84292	-10.9217	-11.1628	-13.041	-13.4366	-13.1386	-14.4128	-14.898	-13.1022	-13.1294	-13.6052	-9.30765	-13.8514	-9.40605	-9.28271	-10.7267	-10.203	-13.3008	-12.201	-8.42059	-10.0341	-6.81352	-7.05153	-4.16923
			-15.8842	-12.6308	-11.1477	-11.8906	-13.6326	-13.1892	-12.5855	-12.354	-14.5177	-13.1912	-15.303	-13.951	-13.9489	-14.9113	-15.872	-15.3995	-14.1911	-13.5277	-13.9831	-13.0939	-14.519	-13.0765	-12.3993	-14.4986	-16.3754	-15.631	-16.2082	-15.3882	-17.373	-14.9196	-16.4849	-15.069	-15.1747	-17.0401	-18.4804	-19.8288	-18.7274	-19.4005	-19.8489	-20.2843	-18.9592	-21.4618	-16.22	-14.3337	-13.6839	-10.9235	-9.05693
			-3.99868	-3.25021	-4.39711	-6.13949	-2.7146	-2.61458	-6.12822	-6.32465	-4.71204	-5.30227	-5.39192	-6.42479	-4.14549	-3.66948	-2.961	-2.30622	-4.58151	-3.56678	-4.10298	-4.09022	-6.31286	-3.64618	-6.55979	-5.013	-5.06814	-3.36368	-3.90052	-5.79463	-4.68448	-4.37743	-2.74414	-4.88956	-5.5308	-6.53673	-5.35318	-5.29036	-4.87546	-3.86243	-4.22369	-5.575	-2.96951	-4.07111	-2.9737	1.55403	4.83156	5.60645	8.97438
			-7.15417	-10.3489	-8.20428	-9.93174	-8.48336	-8.76964	-7.52972	-8.57208	-8.08044	-9.8711	-9.89551	-8.63019	-9.30313	-7.58919	-8.23525	-6.97306	-9.85375	-9.39263	-8.4341	-7.17398	-6.75397	-6.42517	-6.61934	-7.97157	-6.87178	-5.47813	-8.46034	-9.75791	-9.87146	-9.91361	-7.9088	-8.70795	-8.48274	-6.9597	-8.3792	-6.4974	-8.48949	-10.1336	-10.8173	-10.7686	-11.3008	-12.6702	-7.95047	-3.47774	0.036075	4.11518	7.75756
			0.564621	-0.15574	-0.187698	0.439563	-0.647635	-0.668948	-1.60152	-0.816431	-2.15067	-1.13183	-0.358709	-1.57954	-0.444757	0.460004	0.11417	0.255797	0.0359972	0.402553	-0.0484246	-2.44805	-2.94223	-4.06095	0.493944	-3.35668	-4.18774	-4.62483	-5.3551	-3.34136	-3.53471	-5.22559	-5.69336	-6.16191	-5.42584	-6.77316	-7.94344	-6.65289	-6.91287	-6.76553	-7.37893	-3.62498	-3.06735	-6.3912	-11.9214	-7.75063	-5.87837	-2.62176	-2.44737
			-11.4807	-7.00684	-7.1604	-7.70532	-7.8622	-8.13625	-6.01231	-6.60071	-6.06558	-5.16574	-5.45356	-5.82994	-6.28711	-8.13748	-7.77256	-7.28245	-7.85079	-6.80448	-4.11311	-7.02806	-3.30241	-4.2357	-4.58462	-6.23595	-5.2019	-4.91831	-5.86133	-6.87182	-9.03124	-6.8595	-7.29245	-7.70968	-8.994	-8.87532	-9.85208	-6.67824	-10.6621	-8.70256	-7.29453	-8.25588	-10.0539	-9.73225	-7.08708	-3.87975	-1.3707	-0.0606545	0.412453
			-10.8025	-8.24615	-9.12899	-10.0479	-7.6091	-7.46222	-7.97761	-9.6102	-8.99887	-9.7144	-8.83566	-9.53139	-9.03692	-10.0259	-7.23516	-9.35442	-6.25836	-10.551	-11.1911	-10.7437	-9.20167	-11.3274	-9.29115	-7.48309	-8.26127	-7.2164	-8.44298	-8.41028	-7.35992	-10.906	-9.01544	-6.90527	-5.63359	-9.3567	-8.40316	-6.04507	-7.41778	-8.05867	-7.42577	-6.38491	-8.87313	-12.6098	-10.4079	-7.57958	-1.35736	2.73554	7.98083
	mean	1-3sessions	-2.4961	-1.26675	-1.30291	-1.53372	-1.61905	-2.32031	-1.93249	-2.59425	-2.16443	-2.5894	-2.94458	-2.48847	-2.23435	-3.0154	-3.08425	-3.20073	-2.04221	-2.32988	-2.37494	-3.15952	-2.56665	-2.81922	-2.85027	-3.5164	-3.05683	-2.52399	-2.84561	-3.04168	-2.27776	-2.53623	-2.83755	-2.30967	-3.62525	-3.64115	-3.63402	-3.47367	-3.42664	-3.31447	-3.89114	-3.75536	-3.41898	-3.94732	-1.53712	0.857172	1.82271	3.10668	4.94152
	mean	4-10sessions	-2.16192	-1.9372	-1.84113	-2.16895	-2.54043	-2.77406	-2.06534	-2.5461	-3.15225	-2.22363	-2.58855	-3.03163	-2.28706	-2.76259	-2.56116	-3.09514	-2.83021	-2.77649	-2.50648	-3.36883	-2.75416	-2.82597	-3.11462	-3.37784	-3.03681	-3.17621	-3.68452	-3.48378	-3.51072	-3.32162	-3.39883	-3.91271	-3.38732	-4.23296	-3.62498	-3.76569	-4.30751	-4.33392	-4.28789	-3.95014	-3.02507	-3.80003	-1.56104	1.55398	3.29678	5.09471	6.42784
[truncated: 164 more columns]

## Sheet: Fig 3g
		trial time	100	200	300	400	500	600	700	800	900	1000	1100	1200	1300	1400	1500	1600	1700	1800	1900	2000	2100	2200	2300	2400	2500	2600	2700	2800	2900	3000	3100	3200	3300	3400	3500	3600	3700	3800	3900	4000	4100	4200	4300	4400	4500	4600	4700
		100 ms bins
		session 1	-0.341874	-0.410794	-1.67017	-1.97139	-1.93739	-1.27794	-1.03585	-1.62035	-0.489415	-1.36347	-1.5239	-2.49298	-1.38595	-3.80203	-2.76536	-3.19061	-2.86921	-3.22183	-4.69443	-3.86336	-3.25698	-4.38551	-4.62309	-4.63812	-4.51256	-5.81914	-2.6729	-4.29108	-4.22403	-4.85538	-4.0936	-4.75749	-4.51299	-4.80265	-5.25509	-5.67543	-6.99704	-6.04586	-5.78936	-6.61106	-7.51727	-4.42409	0.0615359	5.14141	9.99255	10.9598	14.127
			-2.92676	-0.478931	-3.48502	-1.59209	-3.52814	-6.50161	-3.47279	-2.46563	-1.60646	-2.08659	-1.1238	0.0810465	-6.43072	-0.580382	-6.71149	-4.85147	-4.02617	-3.46817	-2.15522	-1.27324	-2.28348	-4.78715	-5.39696	-4.34269	-1.90608	-4.68404	-2.44171	-3.35266	-3.46458	-4.10659	-2.7411	-2.23966	-4.7906	-1.23121	-1.99857	-2.44569	0.0250296	0.949134	-1.20749	0.883656	3.92481	7.90575	9.31748	10.9088	14.5095	12.4321	12.238
			-0.648554	-3.83489	-5.42773	0.701025	-0.0283507	-2.94829	-3.65983	-3.9133	-5.99566	-4.84939	-4.10578	-4.17726	-2.2645	-4.99845	-4.71438	-0.638226	-4.03614	-5.58941	-5.28447	-6.25802	-8.65471	-7.68937	-7.4583	-5.42564	-6.99026	-4.17704	-6.59355	-8.21064	-6.0623	-6.64959	-7.26733	-8.05712	-8.22611	-6.07447	-4.90514	-7.85562	-7.30451	-6.48173	-5.24467	0.801985	-6.49018	-8.60814	5.66514	13.9831	11.0402	12.1072	15.0361
			0.136949	0.842125	-1.74882	-1.88709	3.88101	0.85167	1.05113	-3.20804	-0.524648	-1.67327	-3.8653	-3.80168	-2.3519	-1.42444	-1.88252	-3.1525	-5.10015	-1.68106	-4.54439	-4.77883	-3.58922	-1.2245	-2.9558	-1.96371	-5.59923	-1.54511	-2.5854	-1.6887	-3.88041	-3.64629	-0.375935	-3.327	-1.81487	-3.66819	-2.21986	-6.45818	-2.94918	-0.161797	-3.81805	-6.03909	-2.81069	-3.53439	-1.97078	-3.82413	-5.7537	-7.11975	-7.1208
			-3.17112	-0.218762	-2.52301	0.10125	0.382692	-2.38848	-3.548	-2.67552	-1.15993	-2.47699	-0.985915	0.173459	-1.71472	1.09725	-1.11474	-0.871268	1.36694	1.01926	-0.447712	0.0840932	-2.02049	-0.476348	-0.211025	-0.318717	-1.82511	-1.73237	-0.736331	-1.24903	-1.84828	-0.856821	-0.369717	-0.611348	2.19343	1.33456	2.93861	-0.901624	2.31411	2.82014	2.42816	1.14301	3.19633	3.65304	3.13674	4.12979	2.92285	-0.458383	3.89986
			-0.0267897	-0.395295	-0.309115	2.49227	1.76087	0.560747	-1.02769	-1.68129	-0.162276	-1.92864	1.72729	0.492128	-0.182525	0.0474656	0.170955	1.75487	0.201428	0.996284	2.07773	0.821473	-0.0866023	1.1422	0.21539	0.28656	2.28517	1.88584	1.21747	2.10756	1.53087	1.31378	0.876221	1.21974	0.5461	1.96353	-0.737309	-0.0461489	-1.26754	-0.546235	-3.05061	-0.304175	0.905554	-1.51908	1.86889	2.04098	1.84348	3.16709	4.67171
			6.34981	6.43426	7.1465	7.95285	6.87886	8.10772	4.99455	8.97068	6.90607	4.63668	3.79664	4.36149	4.83034	7.83674	7.30527	7.02346	8.53843	10.0658	11.328	11.0558	11.6142	14.467	12.4881	8.49682	11.1188	9.99712	8.08753	7.02449	9.95678	10.5651	12.0185	12.7086	10.4233	11.513	9.60486	9.2341	7.20118	8.22944	8.19628	4.75525	2.40624	5.75358	7.59795	10.8855	7.88011	6.47064	7.05503
			-3.81421	-3.244	-5.47642	-4.4436	-5.36408	-5.41538	-6.40995	-5.7873	-6.74281	-6.51797	-7.53101	-7.75552	-7.7493	-7.22518	-8.05755	-9.21486	-7.31725	-8.70302	-7.61409	-8.77551	-7.66515	-9.22476	-8.31589	-8.16249	-7.98213	-9.37591	-8.42525	-9.53967	-10.6875	-10.9871	-10.9759	-11.7146	-12.3992	-12.1797	-12.0967	-12.9303	-12.7609	-12.3605	-12.0818	-12.3776	-12.7559	-12.718	-12.7555	-12.9603	-14.9279	-14.3978	-15.021
			-8.60354	-9.50192	-9.13732	-12.1184	-13.5393	-12.1225	-11.5048	-12.5167	-10.9048	-10.8482	-9.28275	-11.3166	-11.3795	-11.9849	-10.4063	-10.1854	-11.9542	-9.23636	-9.88507	-8.32978	-7.9139	-9.18444	-9.49703	-9.12867	-9.25919	-10.2094	-10.2244	-8.86572	-8.75402	-10.9781	-11.2681	-12.3591	-12.9623	-13.9503	-14.4796	-13.8062	-16.9535	-17.4522	-14.3123	-13.3443	-7.52526	-6.70447	-7.46245	-6.00166	-4.986	-6.63452	-5.943
			-8.54324	-7.1419	-8.37196	-7.24243	-9.45636	-8.64806	-7.92816	-8.47496	-11.6705	-9.91506	-11.9437	-12.2371	-11.5505	-10.473	-8.74027	-9.62521	-9.57926	-9.51705	-9.364	-9.82696	-12.044	-11.7415	-11.1922	-11.1868	-9.39091	-9.07605	-6.02702	-4.45604	-4.34178	-2.89945	-2.82519	-4.14689	-2.44521	-3.20746	-4.05466	-6.76562	-6.78863	-5.63961	-5.91931	-1.43147	0.505334	-0.400061	-2.77928	-1.41365	0.649678	-0.174739	1.92059
			2.51357	2.02238	2.51892	1.97153	1.04018	0.314749	-0.293051	0.842463	0.93139	0.965626	-0.502671	-0.895398	-0.827805	-1.72512	-4.10558	-0.559198	-0.565279	-0.230956	-1.65671	-1.55006	-3.12993	-1.83675	-1.91031	-4.59393	-5.0355	-5.44885	-3.47064	-5.63363	-5.11899	-6.41248	-4.20229	-6.29884	-4.56639	-4.77237	-4.66842	-4.92612	-5.1727	-6.62556	-4.79425	-17.2195	-33.8343	-15.8187	-7.04359	-9.67585	-13.8298	-7.7711	-6.36043
		session 2	0.770527	-1.01615	-1.39878	-0.923708	0.242293	1.67607	1.23103	1.72824	1.53726	2.06556	2.31406	1.26333	0.422578	0.683226	0.828157	0.741396	2.15351	1.0606	0.391664	0.552266	2.15226	0.847997	0.602527	1.26023	1.03522	2.22553	2.88821	2.50428	3.10685	1.71478	3.35324	1.47879	3.64862	2.46129	2.70213	1.97517	3.03565	3.13801	4.38651	3.07499	4.62362	3.81902	6.07058	7.67638	9.78989	13.8955	15.4955
			-18.3462	-15.9745	-11.8302	-13.618	-14.5926	-12.379	-10.383	-12.3382	-9.32186	-10.8221	-12.3516	-14.2503	-14.6205	-14.7456	-13.8343	-14.4563	-14.9744	-12.1696	-11.3776	-14.6443	-12.1497	-12.8549	-12.652	-12.7901	-12.6564	-12.7852	-10.0683	-13.5013	-13.0703	-15.2484	-12.5248	-15.0418	-14.8616	-15.0412	-14.3104	-13.9372	-13.6383	-15.641	-14.7502	-16.6214	-15.6997	-1.52849	10.0336	13.7105	15.5012	15.2708	16.1759
			-7.03158	-3.95683	-6.74929	-5.8656	-7.85271	-3.78707	-6.16557	-8.15132	-4.77148	-6.25989	-8.96341	-6.02755	-8.1084	-8.03818	-10.6086	-8.50854	-8.25595	-9.99098	-9.50402	-9.32942	-8.37161	-10.517	-10.8907	-8.83631	-8.49853	-8.32009	-8.25904	-8.64355	-7.46189	-7.90553	-8.33988	-9.35803	-8.4943	-7.37631	-9.15564	-9.03189	-11.1348	-9.99669	-9.71771	-9.46108	-9.00783	-2.31061	4.33536	6.71304	6.22684	7.62713	6.27484
			-9.37916	-10.5008	-9.1941	-7.82092	-9.87783	-12.5425	-8.72555	-7.1151	-10.2668	-5.33007	-9.38212	-8.37048	-6.09399	-7.10541	-8.06064	-8.9259	-8.05266	-5.57805	-6.2577	-9.11185	-9.18618	-10.1094	-9.82579	-10.705	-10.0069	-9.16833	-10.0725	-8.40164	-10.9217	-11.9465	-12.765	-8.89194	-14.0312	-10.7681	-7.75312	-9.95653	-8.03501	-9.16619	-9.76417	-9.73665	-10.5571	-9.71737	-8.25254	-12.0305	-12.3854	-13.3436	-15.6713
			-0.690616	-0.0878508	0.650396	-0.646207	-0.275264	-0.911159	0.370009	-0.196414	0.858698	1.02753	-0.380786	1.13909	-0.470983	0.608301	-0.104102	1.02317	-0.411364	1.02628	-0.736248	-1.15018	-1.93902	-3.39926	-3.74607	-2.53325	-2.70245	-2.29012	-3.0464	-2.80478	-4.38844	-3.10434	-2.79974	-3.84403	-5.24225	-6.11593	-6.88331	-5.31169	-6.80357	-6.44803	-5.93702	-6.61368	-7.3122	-5.41123	-1.45011	-1.48804	1.7691	4.58802	6.55248
			0.789422	-0.306006	1.98991	-1.52452	-2.82048	-0.247826	-0.32936	-2.20339	0.180459	-2.7759	2.07774	-1.13693	-0.356136	-2.17668	-0.290714	0.984741	1.04912	0.33366	2.03542	0.633413	1.68699	2.40561	3.10427	2.05386	0.851637	0.596593	0.598839	2.73146	2.95952	2.75715	4.06995	1.81073	2.52945	2.07455	3.86526	3.37514	0.785333	3.49252	0.704233	3.54957	-2.71303	6.46025	-0.315205	0.916566	-2.44876	-1.61963	0.024252
			-8.38208	-7.97909	-7.14833	-6.97576	-7.42546	-7.58715	-7.54568	-8.28644	-9.74741	-8.3848	-8.18852	-9.47055	-8.12869	-8.32729	-7.8737	-8.84279	-7.48679	-6.42794	-7.84877	-7.132	-8.58534	-7.42529	-5.22082	-5.8787	-5.7175	-7.56829	-6.53188	-6.66973	-6.58691	-5.66589	2.15959	-2.29018	-0.768647	-5.94627	-8.51806	-7.68713	-8.5408	-6.97099	-10.2427	-9.09472	-6.9902	-7.5078	-7.08507	-8.2434	-8.30659	-7.23701	-4.8868
			-11.3796	-13.0633	-10.8125	-11.6127	-12.9387	-13.3311	-14.8234	-14.3147	-14.4516	-15.3875	-14.4526	-13.0792	-15.6657	-11.8599	-12.6282	-12.9193	-13.2297	-13.0065	-13.1983	-12.8569	-11.9244	-11.677	-13.6149	-10.6919	-11.0747	-10.7401	-11.9198	-10.65	-12.2804	-11.114	-8.20669	-11.3989	-11.259	-10.8124	-11.3777	-14.1321	-13.5733	-12.2933	-14.0048	-11.5804	-8.02492	-5.1603	-3.2266	-2.58049	-3.56821	-4.55679	-5.76547
			-1.70262	-1.30473	-2.57477	-1.71815	-3.08696	-1.81492	-1.12161	-1.46062	-1.91887	-0.729015	-1.23402	-1.42423	-1.75939	-2.29284	-0.0077324	-0.959746	-3.08278	-3.0871	-2.805	-4.81699	-4.9429	-0.698592	-2.67444	-2.14534	-3.14087	-0.30932	-3.29047	-4.52306	-6.35151	-4.74455	-2.04627	-1.79788	-4.0848	-1.82898	-0.912366	-0.896606	0.192424	-0.975388	0.803846	1.89083	3.30796	1.50213	-1.31049	-1.94799	-1.31598	-0.652375	-1.8606
			0.246265	-2.69441	-2.85624	-1.38172	0.990211	1.36402	1.16371	3.28863	2.91825	4.58907	1.66224	1.61479	0.7588	3.20593	2.36194	2.97567	3.30166	4.62486	1.60013	2.49341	2.647	3.24989	5.68929	3.30983	4.69499	6.26124	5.77383	4.83203	3.14333	4.4749	3.8773	5.92526	5.02852	4.12157	3.6757	2.91584	5.3968	4.53041	5.49409	5.48024	12.9284	12.8517	18.0441	-5.00751	2.00348	7.28097	2.73981
		session 3	-4.44278	-3.08917	-4.14258	-5.16988	-2.90973	-3.35006	-4.27079	-3.13639	-4.02801	-2.9408	-2.3445	-1.9012	-2.32719	-2.42685	-0.84314	-0.775799	0.148068	-0.057189	0.210916	-0.233739	-0.377198	0.434354	-1.20232	-0.759816	-0.424212	-0.772205	-1.70285	-2.25246	-2.48749	-1.23391	-2.15916	-1.93809	-0.150264	-0.909895	-2.44833	0.0971104	0.321034	0.770596	1.58728	3.4229	2.22665	6.22786	13.6687	20.5109	24.7838	28.6632	32.3256
			-5.56207	-5.12969	-3.88922	-4.67809	-5.70969	-3.96059	-4.15568	-3.95934	-5.75385	-5.78711	-5.40387	-5.77361	-6.18155	-7.45959	-5.38937	-6.93097	-7.4237	-9.16393	-7.95683	-6.95905	-7.85554	-7.0392	-8.87984	-9.03811	-8.15517	-8.87111	-9.38265	-8.40513	-6.70761	-7.30929	-9.12561	-7.60412	-6.9863	-7.72388	-6.9693	-7.60012	-8.1926	-8.31503	-7.69257	-10.4546	-7.36397	-3.26843	0.270215	3.63143	2.7437	2.87598	4.79201
			-1.39683	-1.17496	-1.74886	0.209075	-1.49114	-1.25217	-1.02124	-0.605188	-1.616	-2.04263	-2.43364	-3.55426	-3.02207	-3.43177	-3.44319	-1.82052	-3.0274	-2.94002	-2.70596	-3.62547	-3.69682	-4.43424	-2.56179	-2.96462	-2.87328	-5.03648	-3.1093	-3.03832	-3.40454	-3.11982	-3.3559	-3.88041	-5.12504	-4.41661	-4.5258	-3.58708	-3.74895	-4.45736	-5.23671	-6.41232	-2.22588	-0.613364	1.89935	6.3014	6.42646	5.77624	5.39724
			-1.81066	-2.45772	-1.84115	0.205176	-1.63748	-1.14203	-1.88352	-3.55509	-3.07508	-3.19461	-3.63277	-3.01934	-1.59607	-2.04622	-4.28078	-2.14611	-4.45302	-3.1264	-3.21526	-4.47443	-2.66409	-0.131476	-1.93296	-1.03808	-1.53487	3.18361	2.28664	0.320521	0.00792263	-2.08606	-1.61103	-1.79468	1.04545	-1.0088	0.710547	-0.777159	0.287212	-2.42876	0.548629	-1.90408	-1.27493	1.70563	0.216104	1.04889	-1.25794	-6.30059	-1.75085
			-1.70262	-1.648	-1.18002	-1.9907	-2.15953	-2.2136	-2.44566	-1.08422	-0.083785	-2.1161	0.186687	0.41951	-0.717258	-0.527983	-0.356694	-1.60139	-0.0589626	0.591348	-1.39484	0.845327	0.6914	0.391248	-1.71918	-0.963295	-0.476895	0.0251452	-0.0679452	1.10781	0.311687	-0.0949723	0.493637	0.111694	0.333525	1.04787	-0.88069	0.549571	-0.004028	2.27771	0.68024	1.18739	1.06235	0.517703	0.63107	-1.61892	0.533644	0.960066	0.399169
			2.47672	4.40747	2.81182	0.699845	-0.810798	-0.0443879	-1.52811	-1.4907	-2.05153	-4.46219	-1.82027	-4.81224	0.044359	-3.39489	-4.50253	-4.29608	-2.11234	-2.73388	-5.74059	-0.424344	-1.14292	-4.04312	-1.29533	-1.25545	0.270483	-0.517704	-2.08304	-2.72346	-0.662983	-3.8132	-3.5675	-3.82976	-0.0650522	-4.04733	-4.80767	-0.680406	-2.124	-3.48673	-1.95263	-1.39688	3.02463	2.38723	2.3919	6.84043	5.23558	1.79847	5.77294
			-5.20534	-5.23295	-3.57041	-3.76795	-4.4707	-4.07777	-5.12979	-5.14788	-4.75642	-4.28284	-5.14224	-4.50956	-5.11792	-4.64345	-6.42005	-5.19144	-5.40682	-5.00725	-5.12579	-4.76996	-6.18667	-5.14303	-4.13471	-4.20857	-5.1031	-6.57335	-5.60407	-5.40991	-5.72468	-4.90797	-5.04	-6.21526	-5.31916	-5.22345	-4.9743	-5.67089	-6.2653	-5.18445	-5.44104	-4.21158	-3.72792	-0.913436	0.169066	1.2183	2.61965	3.45276	4.80011
			-6.98698	-6.26943	-6.71184	-6.1102	-6.37085	-4.44797	-7.10084	-5.68137	-6.9033	-8.46147	-8.86705	-8.12509	-7.28231	-6.5546	-9.07502	-6.78701	-7.9628	-10.1621	-8.99932	-11.8319	-11.5255	-12.3824	-10.8471	-13.5285	-10.0014	-14.4441	-12.6959	-13.475	-13.734	-11.3372	-13.3776	-13.966	-11.0414	-9.30973	-13.5813	-10.6682	-9.62804	-8.98597	-11.9931	-11.4408	-5.97058	-3.04438	-6.21481	-8.30617	-7.455	-7.69597	-7.8224
			-11.3091	-10.8294	-12.1915	-12.577	-10.3946	-12.9957	-13.2277	-13.0315	-10.2628	-11.1868	-12.7528	-11.9869	-11.5587	-11.8934	-11.7784	-12.2263	-15.5102	-12.7212	-13.0992	-12.3469	-12.8912	-13.1319	-14.3005	-13.7603	-14.8031	-14.2934	-14.2452	-15.7224	-15.1092	-14.5136	-13.8865	-14.4023	-16.2735	-15.8941	-16.2056	-17.7597	-15.2284	-15.7959	-14.5679	-16.1837	-13.6765	-15.2875	-12.1212	-13.6836	-15.093	-13.4274	-13.7541
			-1.755	-2.28725	-1.15616	-2.44717	-3.251	-3.15445	-0.875971	-5.22452	-6.92749	-6.85485	-8.18342	-9.34857	-8.07323	-8.06151	-8.89306	-7.8864	-8.39819	-7.50747	-8.67294	-9.26654	-8.89434	-8.59908	-9.24748	-9.29191	-8.83302	-9.43496	-9.74461	-9.99681	-10.4304	-8.60682	-9.10318	-9.59566	-8.95311	-10.4607	-8.33453	-10.1026	-11.0392	-10.6549	-10.264	-8.56008	-9.59027	-10.8029	-9.94751	-9.76261	-11.0187	-10.7695	-9.94525
		session 4	-5.32546	-6.27642	-7.30154	-7.32649	-6.26618	-8.00305	-9.25841	-8.40354	-7.44793	-8.24388	-7.07116	-7.48699	-7.92276	-6.91492	-8.26333	-6.45062	-6.37957	-7.18498	-7.06939	-5.36894	-4.68226	-5.99918	-4.94036	-5.20582	-3.24801	-3.90644	-4.42689	-5.90993	-5.69487	-5.17482	-5.65484	-6.13964	-6.17029	-6.40605	-7.0202	-7.74885	-8.09639	-9.18298	-11.5022	-8.4833	-7.33849	-7.84584	-5.08889	-3.61108	6.13088	8.16992	7.45806
			2.76666	1.29512	-0.779996	0.102336	-1.4977	-2.06879	-0.868879	-0.537028	-1.34394	-2.70497	-4.84558	3.27908	-2.38378	0.551466	-1.14072	-1.57558	-2.12037	-1.47838	-1.82133	-2.70384	-3.26658	-2.67917	-2.62427	-1.36314	-2.89778	-3.88178	-2.30312	-3.03765	-3.79722	-2.13089	-3.52497	-1.12426	-1.6938	-2.84378	-3.5594	-3.04579	-3.83047	-3.63636	-2.05085	-5.17094	-4.12295	-2.12305	-2.50953	-1.51998	-0.749096	-0.687416	0.20296
			-2.0007	-0.435172	-2.90098	-2.18698	-3.00218	-1.80999	-1.20713	-1.91127	-1.91408	-1.79544	-1.56388	-1.85725	-3.17741	-1.59928	-1.48768	-2.43516	-3.62512	-3.12582	-4.27286	-4.71901	-4.56343	-4.04984	-3.51157	-6.82359	-6.09418	-5.56564	-5.26306	-6.30837	-5.49342	-4.36899	-5.1524	-6.82035	-6.44363	-5.92906	-5.3603	-5.40884	-6.89733	-7.75563	-5.9229	-7.27632	-2.69211	-0.551543	2.05836	4.82288	3.68605	4.3572	4.2963
			6.45845	8.25033	8.96537	5.73441	3.32775	2.36264	-1.84422	0.109185	-1.36765	1.40487	-1.41726	-2.11719	0.859322	2.9751	-0.777549	2.46124	3.48891	3.29732	2.6129	4.59253	5.82351	10.032	6.44304	7.40879	9.05552	9.38253	6.70844	9.80107	10.7406	11.3754	15.8659	17.0376	16.0566	15.5052	12.856	14.9581	16.9191	13.8233	14.8209	17.8511	27.5356	25.8502	27.6645	25.3217	27.3988	20.7164	12.206
			-9.06367	-9.26791	-7.7038	-6.3658	-9.234	-7.86988	-7.52239	-7.00335	-8.30048	-6.99065	-5.7788	-8.41511	-5.50243	-5.9467	-7.38218	-9.55508	-9.23327	-10.4267	-10.2429	-11.0448	-10.2638	-13.0794	-10.1125	-12.0718	-11.4634	-10.1377	-7.68791	-8.27189	-9.90231	-7.24772	-7.95346	-9.22784	-8.11051	-10.0533	-8.1166	-8.80917	-7.79608	-7.44356	-6.36572	-8.36431	-3.22149	-4.77508	1.43336	6.40627	7.9713	9.32233	13.8742
			-3.3889	-3.20697	-3.96926	-4.1212	-3.15298	-4.16821	-3.03995	-5.30562	-4.34748	-3.42839	-3.1266	-3.50513	-4.2568	-3.29578	-3.846	-3.5066	-3.94185	-3.81535	-3.68458	-1.64429	-2.80155	-2.88434	-1.58789	-1.32357	0.583735	-0.983976	0.272476	-0.742574	-0.857115	-1.57293	-1.52205	-1.52953	0.268137	-0.64145	0.30038	0.788321	-0.141082	0.433457	-0.784391	-0.0475403	1.95953	2.71836	5.82586	9.45451	12.9945	15.1201	16.0817
			-2.01119	-2.5206	-1.62411	-2.1854	-4.59362	-2.57429	-3.87839	-4.61349	-5.31967	-7.67595	-7.75705	-7.44965	-4.37915	-6.22306	-6.52034	-6.06508	-5.22347	-7.51099	-6.73735	-5.05595	-7.18691	-9.02563	-7.12155	-6.8192	-9.7438	-10.1841	-10.5487	-10.3029	-9.88611	-8.19299	-9.43366	-9.07277	-9.6368	-7.84598	-9.66072	-10.2752	-7.00269	-7.38695	-6.30252	-10.3318	-8.35179	-2.29612	-2.89668	-0.383412	-1.62611	-7.08015	-5.18797
			-2.73453	-3.16218	-4.28449	-3.67978	-3.31436	-3.74967	-2.75198	-4.45285	-4.46283	-5.17355	-3.80557	-4.33446	-4.01136	-4.43764	-4.86412	-4.38921	-4.99515	-3.84866	-5.58065	-3.57657	-4.60659	-4.59768	-5.04046	-5.38048	-5.21429	-4.47723	-4.9143	-4.92508	-4.18496	-5.23662	-5.58694	-4.46891	-6.20991	-4.08949	-4.82406	-4.06384	-4.71467	-5.30544	-5.82137	-2.85611	-0.985516	-2.09783	-3.1699	-2.08312	-1.4568	-2.36	-1.32206
			-0.899858	-2.62436	0.0608402	-2.5431	-3.95461	-2.67899	-3.37585	-4.76048	-3.85051	-3.7583	-3.59354	-2.93291	-2.73337	-0.628724	-3.72668	-3.20281	-4.6758	-5.86945	-6.92812	-8.16992	-6.79956	-7.46135	-6.4171	-7.01987	-8.17448	-6.66344	-6.62714	-7.3142	-6.85441	-7.5893	-5.61707	-3.5899	-5.63333	-6.19592	-5.48559	-6.81456	-6.66004	-8.24248	-6.11058	-5.3563	-0.89353	-5.80161	-5.29022	-3.40168	-4.1324	-7.06453	-7.8104
			-12.4729	-13.4827	-14.2382	-12.5555	-14.2393	-14.6452	-13.6793	-14.5689	-13.9109	-11.7475	-14.1665	-13.7902	-13.936	-13.9734	-14.0489	-13.7291	-14.0154	-12.697	-13.124	-13.5	-15.2295	-14.4157	-15.2726	-14.3399	-14.5248	-16.4718	-16.6726	-17.3862	-17.7203	-17.1349	-16.8277	-18.2404	-17.6277	-20.2824	-19.0639	-20.8599	-21.9342	-23.1247	-23.5729	-20.675	-18.65	-17.4437	-18.3705	-17.7024	-19.354	-17.2422	-16.9249
			-2.2197	-2.5016	-3.92563	-3.89482	-4.04543	-2.59696	-2.63926	-2.90093	-2.13994	-3.74397	-2.89922	-2.33302	-0.730479	-1.31964	-2.71886	-2.22032	-2.60431	-4.26163	-2.51043	-4.37712	-4.33992	-4.90438	-3.90432	-5.36075	-4.87328	-5.63695	-5.35119	-6.2858	-6.95586	-7.15171	-6.9749	-6.73048	-7.67917	-7.09704	-7.05159	-7.27391	-6.53946	-5.85348	-4.74603	-6.95662	-4.91141	-6.36022	-8.77994	-7.34603	-7.68055	-6.52388	-8.24886
		session 5	-13.7833	-12.9626	-13.1623	-12.8663	-14.5011	-14.6354	-14.2491	-13.6862	-14.0607	-14.3627	-14.4086	-15.7034	-15.0052	-15.098	-14.7152	-16.0538	-14.141	-15.0333	-15.0965	-14.9404	-16.1896	-15.8144	-15.0447	-13.8905	-14.5905	-14.073	-13.9267	-15.0384	-13.3606	-13.7581	-14.9595	-15.0611	-13.0255	-12.4485	-15.2228	-12.9928	-13.1657	-11.9316	-11.6865	-12.4251	-13.0986	-11.2118	-6.33898	-0.755767	2.34562	8.01374	12.8753
			-3.98584	-4.26584	-6.06238	-6.44401	-5.90572	-3.70994	-6.11956	-7.72607	-8.19934	-8.06791	-10.5671	-10.9883	-8.04634	-7.5344	-8.04468	-5.91573	-7.01355	-7.5334	-9.14095	-7.22661	-7.46858	-7.26235	-8.32336	-9.69422	-10.1867	-6.85708	-5.14343	-6.42217	-5.64577	-7.68274	-5.37502	-9.51188	-5.51406	-7.40721	-6.28702	-10.4524	-8.65985	-8.91184	-11.1362	-6.04276	-10.0606	-6.68414	-3.87822	-1.56989	1.54539	1.34933	2.97842
			-4.72234	-5.7158	-4.53643	-4.13604	-5.21619	-3.38929	-3.42634	-1.48336	-3.37418	-2.83557	-4.07067	-3.99509	-3.64065	-4.39374	-3.02255	-4.50262	-4.49723	-4.68502	-4.69483	-5.04625	-3.97307	-7.72618	-4.76013	-4.97992	-4.44495	-4.2357	-4.16014	-2.50067	-3.70854	-4.37287	-4.69881	-4.42404	-4.47696	-3.92207	-3.4021	-4.29757	-3.76917	-5.48773	-5.94198	-4.27417	-8.1523	-7.65431	-3.82462	-2.32691	-1.69788	-1.88569	0.436779
			-9.72481	-7.06255	-6.76796	-8.33834	-9.98751	-10.5997	-11.5905	-13.1076	-11.4013	-16.5559	-12.5186	-9.71422	-10.0848	-11.7128	-14.669	-15.5487	-12.8866	-11.6444	-14.1777	-13.6184	-12.6619	-13.7716	-13.0887	-10.8251	-13.5543	-14.5652	-12.3905	-12.181	-11.0203	-9.82272	-11.4114	-10.1857	-10.2233	-12.2501	-9.61088	-11.2186	-13.5852	-11.0877	-13.3888	-11.3799	-12.8938	-7.15285	-10.0504	-6.25396	-10.1834	-10.4789	-12.036
			-9.55391	-10.6117	-8.58742	-8.40391	-8.55567	-9.12662	-6.15608	-4.36843	-5.33105	-7.55983	-7.26766	-7.39215	-7.26094	-7.86321	-7.53439	-8.91025	-7.38927	-8.91131	-7.6952	-6.7605	-6.28801	-6.58963	-7.83081	-7.07639	-8.1618	-8.28134	-8.33018	-7.88513	-6.52701	-8.82726	-6.63797	-7.44567	-5.81272	-7.92179	-3.97561	-4.35661	-3.12588	-5.82568	-2.05373	-1.77669	-3.12212	1.23341	5.74034	7.25213	10.0401	9.12878	11.9603
			-2.42493	-0.13529	-0.648542	-1.8812	-2.47591	-5.66959	0.0666684	-4.28422	-7.01571	-3.73769	-4.67608	-3.33347	-2.17081	-1.31922	-2.05377	-2.67839	-5.26672	-4.10948	-2.18719	-2.79345	-3.34408	-4.41124	-6.24768	-2.30039	-10.9331	-6.41977	-4.70664	-6.51924	-3.64373	-1.67604	-4.14714	-2.49654	-0.746012	1.69222	0.358277	4.09125	-1.30995	-2.93418	0.121966	-3.49929	-1.26924	-3.8841	0.855847	8.29643	11.8623	14.3501	16.9507
			-8.51347	-8.79205	-9.11304	-9.04938	-7.318	-6.82658	-6.09802	-7.93682	-6.80029	-7.16654	-6.48223	-8.05556	-7.47287	-7.7395	-7.51515	-8.92303	-8.87723	-8.46446	-7.51645	-9.6623	-9.38355	-8.10879	-7.75814	-7.87197	-7.75334	-9.24445	-8.75723	-9.11349	-9.37925	-9.26406	-10.3317	-9.50654	-10.6271	-11.442	-12.7845	-11.7117	-10.9626	-11.9654	-11.5177	-13.4122	-12.231	-7.277	-2.53829	1.72789	5.00789	7.58241	9.77923
			3.36356	5.28329	5.87014	5.57354	5.76606	2.55853	5.17548	2.52704	3.3744	3.92565	0.360794	-0.0620469	0.725919	-2.58879	-0.123671	3.02453	3.65961	2.44619	1.54727	3.26261	3.86558	3.55025	4.37048	3.88975	5.06605	4.55005	4.68292	4.90999	4.01599	3.90318	5.62823	4.31064	5.65134	5.57964	3.49864	5.94094	3.92179	4.12163	3.95466	1.25414	3.0942	7.98427	-7.35741	7.68433	7.38248	5.35282	11.0014
			0.863872	0.611373	0.0624005	-0.123536	-1.54391	-1.49609	-1.87482	-2.41469	-1.64543	-1.71189	-1.81436	-2.70567	-2.13554	-1.5159	-1.93464	-1.41725	-0.526976	-0.838436	-0.26079	-0.658582	0.110291	-0.74432	-0.690995	-1.04984	-1.33897	-0.651887	-0.988491	-0.0150174	-0.353458	0.290134	-0.584452	0.547123	0.263018	0.923332	0.434407	-0.109854	-1.00629	-0.687277	0.812095	2.9183	1.41069	2.3953	1.34755	1.11345	1.31816	1.44138	0.149869
			-3.53205	-3.47259	-4.01346	-4.29757	-3.64645	-4.23885	-3.74612	-3.54152	-2.76529	-2.35278	-4.67959	-5.70532	-8.14211	-4.51634	-6.00191	-5.9341	-5.64366	-7.67351	-7.09335	-8.60897	-7.08457	-7.73157	-9.53084	-9.61458	-8.24594	-9.48108	-8.24913	-10.5005	-8.3379	-7.83348	-8.98032	-8.32999	-7.98707	-11.2546	-10.6527	-8.17667	-9.50662	-11.0189	-12.7206	-9.51202	-3.36343	-2.07445	0.79345	-0.217564	-3.83042	-0.659885	-1.65025
			-2.74217	-4.26144	-2.21179	-2.25083	-3.55116	-2.98449	-3.71409	-2.87556	-1.9229	-2.97959	-4.28309	-3.31477	-3.64136	-4.79679	-3.23451	-2.2167	-2.88244	-4.33373	-4.65747	-4.35371	-2.54817	-2.48246	-3.61383	-3.41314	-3.85607	-2.54115	-3.97825	-5.39258	-5.61349	-4.83864	-6.17628	-6.28802	-6.41176	-7.51601	-6.927	-6.66899	-6.56409	-6.05226	-7.05762	-6.02011	-6.87181	-4.43233	-6.80908	-6.86733	-6.10179	-4.92546	-4.79433
			-0.783843	0.408682	-0.016434	-0.0362397	0.720352	-0.351274	0.700797	0.0261442	-0.723585	0.186742	1.05602	0.349166	0.860802	1.6914	1.17572	1.40639	1.43984	-0.638774	0.989536	1.96082	1.88178	1.21163	1.22752	1.52508	2.70555	2.43851	3.13657	2.21678	3.1056	1.44105	1.47558	0.303748	1.52027	2.41995	1.52141	1.31208	0.998382	1.47328	1.18693	0.675858	1.50002	-2.54882	-1.39554	-0.0124731	-1.216	-0.531563	-0.0152448
		session 6	-2.0115	-1.25348	-2.92207	-2.72563	-2.45222	-1.86831	-2.71704	-3.60353	-3.13706	-3.95235	-3.48325	-2.98772	-2.85705	-3.38486	-3.18293	-3.41839	-3.87204	-3.64703	-3.41598	-2.72779	-2.05744	-4.42132	-5.05676	-3.29524	-3.44394	-4.21048	-4.02874	-3.92163	-2.49162	-5.21325	-4.21099	-4.42556	-7.07942	-6.48857	-5.53145	-4.44322	-3.94027	-2.87233	-2.70367	-3.10034	-2.62256	-2.25894	4.53792	11.3548	17.3156	22.0148	25.8132
			1.58193	2.71104	4.68764	4.04906	3.75279	2.4016	3.75206	2.28178	4.94654	4.71133	2.26302	2.70251	2.43327	1.46885	1.13263	1.72594	1.87513	2.7626	1.67928	3.07118	4.13958	1.93021	4.7671	1.63058	2.66121	2.34071	1.89511	1.98168	-0.165424	2.3557	3.5207	3.86905	3.6662	4.03373	5.6609	5.31573	3.67018	4.58571	8.06782	6.04171	3.6242	9.30416	8.50139	10.9344	12.0136	17.0057	17.7995
			-1.51667	-1.72614	-1.45625	-3.54433	-1.12934	-2.91175	-2.49275	-4.40267	-4.43736	-4.17034	-4.20784	-4.7084	-4.56264	-3.78732	-3.77761	-4.40361	-3.90457	-3.62473	-5.55496	-3.92471	-2.45951	-3.54466	-4.59662	-3.1531	-4.25642	-3.79739	-4.5272	-4.01873	-5.24089	-4.16862	-4.54135	-3.17171	-2.62091	-1.62921	-2.2696	-3.1767	-2.47457	-2.34856	-2.06241	-0.807545	-2.50721	-5.93518	0.369889	0.295344	3.24535	3.18413	1.97381
			-0.789516	-1.98693	-0.220558	-4.76205	0.193027	-1.1075	-2.30819	0.0554642	1.86518	0.536966	-0.136437	-1.13275	-0.0598118	-2.42366	2.59496	-2.17675	-0.982351	-3.55522	-0.243516	1.3878	-2.06571	-3.82588	-2.67685	-3.98647	0.497081	0.585732	-1.75081	0.510711	0.689513	-2.72373	-0.284922	-0.837453	-1.58319	-2.37276	-1.84159	-2.17047	-2.2059	-0.953749	-2.84465	1.59746	-2.71775	-0.364459	-3.60173	-3.805	-6.25367	-3.96937	1.37437
			-3.67935	-3.62209	-2.64785	-3.80166	-1.36014	-1.11546	1.69718	2.31403	3.1906	4.30388	2.07045	1.04079	5.09492	0.964198	2.90714	2.43135	3.75584	4.46004	5.27124	5.74532	4.30613	5.95731	3.96087	3.39817	3.4345	6.30278	2.13304	2.38897	0.557096	-0.388918	-1.30217	-0.290264	-1.99207	1.50224	-1.44313	-3.00759	-1.94788	-3.02804	-0.106161	0.0979035	2.17772	9.70766	17.2628	18.2819	20.5705	22.9109	24.284
			-4.37689	-5.744	-4.08713	-6.71697	-6.05377	-4.44805	-9.27119	-9.63906	-7.85219	-8.2857	-9.47764	-9.50433	-11.3723	-13.5834	-10.5729	-8.17595	-12.827	-11.7459	-12.4163	-14.0992	-12.5074	-11.6615	-9.47391	-12.4325	-11.6466	-9.01939	-10.4908	-12.2376	-12.2627	-14.0561	-12.964	-15.1741	-15.4441	-12.0562	-14.5935	-15.6155	-14.7563	-13.3464	-15.8663	-15.3964	-12.3254	-3.42632	7.58157	14.5204	12.1363	5.36963	4.42422
			-9.27328	-9.36724	-9.77815	-9.2532	-9.66184	-11.3382	-9.47901	-9.81296	-8.91452	-9.27701	-8.09314	-6.467	-8.70108	-8.26484	-10.1945	-8.56192	-7.25681	-6.70531	-8.33854	-7.27273	-8.23483	-7.91293	-8.25826	-7.60619	-7.15168	-8.86453	-8.71926	-8.15621	-9.59791	-8.63382	-10.2387	-9.36473	-10.8293	-9.42197	-8.26819	-8.32002	-9.20259	-9.73777	-11.307	-11.5041	-8.94913	-7.14445	-4.21855	-0.21753	-0.300707	1.02273	1.12257
			-7.61622	-2.92401	-5.21626	-6.41042	-4.48129	-6.13914	-2.23882	-3.93773	-3.59987	-5.20539	-2.60563	-4.12875	-3.38423	-5.45673	-4.62796	-3.72617	-4.82367	-2.81507	-3.54802	-2.73903	-1.9401	-1.51969	-1.82899	-3.70826	-2.15538	-2.92857	-3.19543	-3.37306	-3.87403	-5.78535	-3.96811	-4.16537	-2.66929	-3.08108	-5.11877	-5.13619	-6.4742	-6.72098	-7.15029	-7.05359	-7.34914	-3.49363	2.17067	1.8902	-0.455394	0.699683	-1.96527
			-3.18118	-2.54385	-2.76207	-3.40343	-3.42611	-2.6079	-4.56003	-5.13619	-3.47563	-3.53315	-2.61736	-3.23391	-2.71334	-1.77722	-1.65544	-1.63719	-1.5466	-2.42504	-4.08652	-2.61789	-2.65595	-1.30099	-0.402285	-1.97858	-3.16061	-3.14581	-2.5008	-2.94851	-2.70666	-2.12028	-2.69732	-2.65894	-4.06129	-2.3172	-2.97216	-2.8113	-4.2058	-3.56875	-2.32458	-0.344491	-1.11205	-0.155323	-1.06669	-1.24439	-2.04243	-1.33971	-1.73106
			-6.72009	-6.22778	-6.85234	-5.93296	-8.03979	-4.9558	-6.28712	-7.98998	-6.72525	-7.75904	-8.13837	-7.70062	-8.52156	-7.40308	-7.55143	-10.4045	-6.79278	-8.73072	-17.0093	-10.3215	-15.4834	-9.30226	-6.87656	-7.07839	-10.028	-8.28378	-10.4685	-7.02865	-10.3742	-11.9111	-11.6067	-13.0166	-11.9484	-11.7253	-13.0984	-12.9165	-13.2283	-12.2967	-12.9182	-9.20069	-9.41275	-10.6861	-8.1068	-8.3685	-8.32722	-11.3315	-10.8382
			-0.685276	-1.53183	-0.838014	-0.841456	1.1563	1.63405	-1.40277	1.39797	0.429113	-1.54128	0.100495	0.210813	-1.05569	-1.16018	-2.60732	-2.20039	-1.18564	-0.133761	-1.11554	-1.53416	-1.35724	-2.16395	-1.98376	-3.44319	-2.04833	-0.856533	-1.53085	-1.246	-0.812881	-2.4968	-3.92339	-3.03562	-2.37982	-2.12008	-2.33147	-4.47094	-5.28837	-3.2578	-2.32884	-0.594345	-1.04711	-1.26536	-8.66353	-8.35406	-10.14	-9.77629	-7.41029
			-6.27485	-3.84341	-3.95535	-2.738	-4.05304	-6.7642	-6.48791	-6.70976	-6.78941	-8.57985	-6.98125	-8.71182	-8.49068	-7.63556	-7.31416	-5.96452	-6.31048	-5.80845	-11.4261	-11.3166	-9.69917	-8.22513	-10.7973	-7.97056	-8.17914	-6.91256	-7.08955	-7.25891	-5.79656	-4.76149	-4.73401	-5.23007	-5.38639	-6.06853	-5.27029	-4.3207	-4.63878	-5.52896	-5.40235	-6.25504	-6.31304	-5.1237	-7.28112	-9.13632	-6.1212	-7.79735	-7.82129
		session 7	-4.52958	-4.34327	-5.33168	-7.04561	-5.98773	-6.38841	-6.67317	-5.61696	-6.52087	-6.49196	-8.14982	-8.01617	-8.66576	-8.11689	-6.94598	-8.64935	-7.63105	-8.55186	-7.7873	-8.88602	-7.1908	-7.95069	-8.24027	-8.57826	-8.84587	-10.4763	-10.4697	-9.07029	-9.00484	-8.60382	-7.8268	-7.31909	-6.65787	-6.95534	-6.73391	-5.68943	-7.63773	-6.70201	-6.02316	-6.37207	-3.93031	-3.99693	0.261764	3.62021	8.70116	13.7963	17.8801
			-5.2521	-7.27021	-8.36472	-6.35036	-5.35528	-6.75621	-5.93637	-5.94752	-5.7528	-6.48779	-5.37559	-5.70347	-6.9212	-2.87066	-4.89578	-5.76586	-5.97757	-5.51984	-6.33301	-4.69103	-5.96981	-4.41505	-5.63085	-3.39722	-5.70604	-3.92846	-5.70523	-5.6211	-5.48392	-3.83141	-6.68358	-4.47415	-2.30605	-6.23988	-4.52907	-4.14022	-6.28336	-7.70734	-5.76274	-8.01952	-5.06836	-4.80199	-2.87674	0.884735	2.09914	5.07777	1.35022
			-0.919813	-3.02743	-3.57187	-0.338231	-2.52618	-2.5307	-3.29277	-1.44032	-0.853783	-1.59875	-2.21471	-1.97053	-0.507493	-3.57222	-1.64797	-2.3564	-2.42568	-2.71065	-0.828222	-4.02682	-3.14761	-2.34814	-3.26729	-2.94841	-3.79111	0.152856	-2.85156	-4.07089	-4.00614	-5.6324	-4.45646	-5.9696	-4.6091	-3.89188	-3.94487	-4.19663	-5.52833	-2.41406	-3.71869	-3.83971	-3.3791	-8.62901	-1.04303	5.69574	5.68672	3.73632	6.50175
			-5.93864	-6.52932	-8.37544	-6.01612	-6.05422	-4.91012	-5.0525	-4.25484	-2.40443	-3.18626	-4.28887	-2.04344	-2.41044	-2.46124	-3.784	-2.19801	-2.93487	-2.99398	-2.73002	-2.23075	-5.39982	-4.02733	-4.724	-6.97324	-5.81511	-5.86809	-7.7371	-8.08176	-8.51004	-8.54132	-9.69533	-10.2558	-10.4294	-9.6882	-9.90535	-9.03413	-9.38894	-9.2736	-9.83381	-9.93689	-6.59869	-6.83515	-8.78549	-10.7739	-9.4454	-6.36868	-5.96154
			5.55243	5.02669	3.98917	3.59912	4.44559	3.69143	3.89284	2.27595	1.97135	0.292572	2.06087	1.5678	1.89575	3.38402	2.37276	1.42762	1.71796	1.72544	3.58476	4.69006	2.15257	2.575	4.06502	2.40271	4.83428	3.81479	4.33288	3.78153	3.1846	3.68281	4.25443	3.73602	3.99633	2.72243	3.95369	3.03243	4.65758	2.67081	5.51727	2.91078	4.07335	6.40291	4.97372	7.04776	9.37284	7.88967	9.64472
			-6.05227	-5.53056	-4.67339	-3.89656	-5.32685	-5.25835	-6.23203	-6.49338	-8.02748	-9.58315	-7.40096	-10.2236	-8.51493	-10.3217	-9.62467	-8.0813	-9.4516	-9.70017	-9.884	-9.97925	-12.9296	-12.6564	-10.3274	-10.5418	-10.8839	-10.9847	-12.1885	-9.98081	-11.3132	-11.2175	-11.6162	-12.4922	-14.8514	-12.0258	-15.1342	-14.3568	-14.2078	-16.1226	-15.5957	-16.0494	-11.2972	-8.19243	-2.10445	-0.483165	-2.23305	0.263817	0.78456
			-1.78895	-2.13284	-0.995739	-2.34204	-1.89993	-1.78375	-1.98211	-2.82267	-1.99735	-2.09785	-2.33567	-3.73257	-2.97061	-3.75277	-4.57212	-3.51791	-3.64105	-4.01422	-3.41465	-3.78052	-3.17535	-3.08156	-5.80646	-3.65537	-3.97055	-1.87634	-2.94388	-4.08549	-4.33291	-5.40302	-4.50912	-4.7835	-4.1728	-3.86832	-3.32055	-3.69315	-4.86505	-4.52226	-3.05736	-2.77618	-5.85495	-2.58365	-0.0729542	4.69412	9.45388	12.5154	14.5264
			-6.69412	-7.32917	-8.51236	-9.47126	-9.44318	-7.7333	-7.9321	-7.97679	-6.53168	-10.0596	-7.93996	-9.24481	-7.23109	-8.52661	-7.46841	-7.03123	-8.2234	-9.70518	-9.77927	-9.85926	-9.34513	-10.4025	-8.86915	-8.71674	-8.46271	-9.80888	-8.4387	-8.44919	-6.85969	-3.88531	-4.51298	-2.81286	-2.97571	-2.70584	-3.55094	-4.71761	-2.70827	-5.63098	-4.20712	-9.59371	-13.7907	-3.89283	-3.41148	-3.01529	-2.21173	-3.54865	-2.68509
			-3.22624	-2.39004	-3.07919	-4.41007	-4.62717	-4.81533	-5.14875	-5.60318	-5.30903	-6.37269	-5.39596	-5.72046	-7.25461	-6.90256	-5.90201	-8.28511	-6.81969	-8.09627	-8.4576	-9.27734	-9.66197	-9.96014	-11.8948	-11.8264	-9.82166	-10.5226	-9.7026	-10.6146	-10.1213	-10.0325	-10.1068	-11.0596	-10.7855	-11.1897	-11.101	-11.2963	-11.7057	-11.7403	-9.39551	-10.6259	-9.8454	-9.91426	-10.4425	-9.77099	-9.12404	-8.78628	-7.8994
			-8.9032	-8.14152	-10.0524	-10.01	-9.45918	-10.1254	-8.53361	-8.97036	-9.91431	-11.2014	-10.9543	-10.1013	-10.6213	-10.1314	-11.3506	-10.6223	-12.4387	-11.6349	-14.2453	-14.0431	-13.1794	-14.5666	-14.7583	-13.0775	-16.4434	-15.7369	-15.9468	-16.7	-15.7887	-15.893	-13.4069	-15.0583	-12.5352	-13.5545	-12.7857	-12.6449	-11.1804	-14.4009	-12.9102	-10.512	-8.51162	-8.59579	-8.12626	-3.17196	-4.72532	-5.01295	-5.4107
			-6.63463	-7.11325	-6.44369	-6.22049	-5.352	-6.76208	-8.09351	-7.08783	-5.21381	-6.57693	-6.80452	-4.89375	-6.25304	-6.02632	-6.87831	-5.92379	-5.12609	-7.86447	-7.13988	-6.37303	-7.09773	-5.8537	-7.00158	-6.12514	-6.20466	-7.12674	-5.37748	-7.4629	-7.78591	-7.42292	-6.986	-7.72651	-6.79019	-8.68065	-8.05298	-7.94329	-5.1329	-6.00755	-5.56684	-4.04363	-1.95896	-2.92593	-4.22987	-4.98517	-6.11959	-4.47119	-2.48956
			-1.59491	-3.2107	-3.3649	-5.14185	-6.59168	-5.15217	-6.05432	-4.08521	-6.24096	-4.34393	-6.71226	-8.15665	-11.2224	-9.51448	-10.046	-10.487	-11.1576	-9.31923	-7.64604	-8.73383	-11.6352	-10.7254	-9.99215	-10.3007	-11.1615	-10.5021	-11.5251	-11.8092	-11.1878	-11.2626	-11.4954	-12.2397	-10.6615	-11.156	-14.3428	-12.8368	-13.5748	-12.9433	-13.5039	-13.2811	-11.1422	-10.2821	-10.9455	-11.6885	-14.7791	-15.0129	-13.7464
		session 8	-5.24509	-5.41696	-6.56299	-7.15343	-7.12897	-6.34822	-7.89033	-6.79452	-7.18917	-7.91485	-7.60395	-6.85361	-7.44959	-6.72559	-5.11216	-6.99637	-6.44256	-4.4263	-5.02891	-5.18777	-6.19123	-5.06595	-4.80707	-4.26911	-5.89305	-7.25661	-7.57089	-8.52686	-7.1719	-7.1073	-6.62594	-6.8831	-8.01462	-7.80424	-8.90423	-8.51965	-7.18643	-7.23118	-7.21337	-7.58453	-8.07652	-7.1593	-0.513752	2.68451	10.2502	13.3195	14.8144
			4.57223	2.6135	8.52371	1.48519	4.68514	0.289849	4.25778	6.34537	5.00324	5.31367	4.32266	3.72672	1.46624	5.69779	3.88848	4.33893	5.29562	5.35609	3.18493	4.24996	3.55571	4.17056	3.22208	2.82243	2.91129	1.60942	2.50894	2.79558	1.88384	3.69282	1.6233	2.32994	3.56117	3.62914	3.91559	0.88366	4.75804	4.28414	1.71683	7.8602	0.651451	7.69881	4.46611	8.58849	6.63257	7.28691	11.3574
			-4.56024	-4.85686	-4.1682	-4.89078	-5.6359	-3.93625	-5.5698	-6.33988	-7.59124	-6.68114	-7.68902	-6.9681	-6.8147	-7.14007	-6.60967	-5.73067	-6.75122	-6.43968	-6.29801	-6.08719	-6.72553	-8.6853	-8.91821	-7.74118	-6.30077	-6.44055	-5.76941	-6.74613	-6.25272	-7.04177	-7.44398	-6.96131	-9.58881	-8.1713	-8.16053	-7.45484	-10.013	-9.50438	-11.5776	-8.8773	-14.1037	-12.4769	-2.04505	-3.04003	-0.00641684	2.65084	2.6497
			-4.81424	-3.93843	-5.20578	-5.03087	-6.28577	-5.96567	-7.57289	-7.61513	-6.80142	-8.47017	-8.11516	-8.78748	-11.3388	-8.983	-10.6947	-9.45584	-7.8406	-8.16973	-8.96086	-8.30363	-7.51074	-8.07332	-8.12432	-9.43819	-6.83691	-9.51469	-8.43834	-9.50068	-9.47243	-11.8469	-6.95423	-10.074	-9.68026	-9.4378	-9.33495	-10.9641	-9.99717	-10.6591	-9.40446	-6.38493	-7.03752	-0.986854	-7.35053	-6.256	-7.86871	-8.26661	-9.75687
			-1.17516	0.599098	-0.464805	-0.381308	-0.339946	0.240781	0.408511	-1.34259	0.303523	-1.2847	-3.23988	-3.11368	-3.59543	-4.27467	-3.0702	-4.2251	-4.8078	-4.62105	-5.3848	-3.97746	-7.08906	-4.3017	-4.36222	-5.44309	-5.83446	-5.28568	-5.75153	-6.37779	-2.33439	-2.303	-2.89586	-1.27861	-2.01368	-2.91457	-2.57819	-0.938137	-1.51229	-1.78017	0.800227	0.462691	1.85073	0.0441891	-0.262041	-0.850003	1.06638	0.218698	-0.122577
			-1.19133	-1.63326	-2.78915	-2.57375	-1.75431	-2.67648	-1.92141	-2.93256	-3.22878	-3.96513	-3.32397	-5.0474	-5.28692	-4.34271	-5.69261	-7.24598	-5.29168	-4.79513	-4.88138	-3.29286	-4.96137	-4.49692	-3.7011	-3.69694	-3.17	-1.67489	-1.87105	-1.45814	-2.61917	-1.90734	-0.184086	-1.1558	0.0152536	-0.992948	-1.4529	-0.896373	-0.736311	-0.689771	-3.1735	-2.13916	-5.1479	-3.15382	1.42043	3.13614	5.35421	7.76409	7.89754
			-3.28389	-1.33241	0.310107	-6.09012	-2.02458	-2.01806	-1.02112	-3.93181	-3.91682	-5.96471	-3.42676	-4.36571	-4.42475	-4.81554	-5.34195	-5.68664	-4.96343	-4.80731	-6.18647	-4.67444	-5.60008	-4.25426	-4.31032	-5.56386	-5.68062	-4.18038	-4.89691	-6.16092	-5.62725	-6.66522	-5.16278	-6.80682	-6.60639	-4.81035	-8.08627	-7.56663	-9.55181	-9.84812	-7.70024	-7.97095	-11.1029	-6.20055	-9.55657	-9.79066	-8.84557	-3.62242	-7.64222
			6.52537	6.38627	6.21421	5.78607	5.97285	5.58971	5.89805	7.66372	6.28499	5.74577	6.68223	6.25528	5.14233	5.50773	5.88854	6.11521	6.40159	5.9832	6.0884	6.74531	5.66468	5.88694	6.17801	4.16035	5.07117	6.73603	6.30574	7.08052	6.18941	5.17904	5.70947	4.57734	4.15829	3.52385	3.38826	3.84838	3.15912	2.54254	1.7018	2.74648	2.93418	3.16152	2.14071	2.44063	0.640349	1.42963	0.966405
			-4.87906	-4.19901	-7.11582	-5.40451	-4.57791	-6.31186	-6.73974	-5.82782	-7.46766	-6.88498	-6.00932	-7.41984	-6.14013	-7.27399	-10.256	-10.3886	-11.7085	-9.45723	-11.2374	-11.4596	-9.54561	-11.8981	-11.9581	-13.052	-13.3066	-13.3822	-15.3283	-13.8348	-14.5387	-15.2514	-16.354	-14.3439	-12.8931	-13.5708	-13.7974	-10.8738	-11.4375	-11.4867	-13.5844	-10.4478	-8.2373	-7.92019	-8.99509	-7.1198	-7.66547	-9.35204	-11.0682
			-3.46999	-6.46727	-0.324799	-3.64123	-3.30289	-1.06784	-2.96182	-23.6099	-1.79465	-1.18706	-2.57937	5.12198	-5.16417	-1.77226	-0.267094	-1.22096	3.08839	-30.8816	-2.82018	-2.52675	-3.1404	-0.686596	-1.70131	0.866791	-1.31305	-8.76895	-0.90311	-1.79559	-1.8634	-0.862042	1.36494	-1.20386	-2.21661	11.9599	-2.66404	-26.6598	-1.1581	-2.23391	-2.04868	-0.085759	0.891427	2.51128	1.29032	-1.97884	-3.43714	0.0329408	-0.355284
			-1.07925	-1.29471	-1.5791	-0.654227	-1.23918	-1.65581	-2.46785	-2.50184	-2.46602	-2.78033	-4.05262	-3.55865	-3.44747	-3.81638	-5.04121	-4.40329	-3.95029	-4.38948	-2.60179	-4.16993	-4.4812	-4.99558	-3.29833	-2.76443	-5.18889	-3.89222	-4.21319	-4.27117	-3.88731	-2.9686	-4.32554	-3.03043	-5.178	-5.06423	-5.75562	-3.61989	-5.35841	-5.11374	-5.31852	-6.11767	-10.5672	-5.73599	-5.71041	-4.37047	-5.08113	-4.65868	-4.45923
		session 9	-6.29069	-5.57946	-4.97177	-5.92852	-6.7921	-7.87856	-8.42318	-7.8497	-8.42011	-5.40618	-6.44215	-6.01337	-5.91738	-6.06273	-6.44719	-7.78664	-4.81692	-4.90127	-5.35069	-5.30466	-4.56148	-5.75096	-5.95609	-5.32116	-5.00749	-4.8896	-4.39603	-5.53693	-3.99907	-4.04445	-3.67495	-4.1496	-4.72385	-5.18005	-4.48166	-4.97499	-3.93925	-5.35156	-6.41466	-3.40866	-5.0408	-4.16191	-4.84084	-0.451463	1.04716	5.26689	8.99193
			-0.636499	-0.446826	-0.717832	-0.0790164	-1.61129	-1.69178	-2.83495	-4.47321	0.258465	0.0671145	-2.50987	-0.893277	-1.01805	-4.30679	-3.13136	-4.35122	-3.48883	-3.36551	-2.22006	-5.02407	-3.449	-5.10213	-3.11001	-4.3165	-5.19305	-4.30748	-5.09711	-5.91468	-4.23055	-5.90904	-3.31784	-5.63972	-6.33287	-4.97401	-4.30786	-3.91818	-6.87947	-6.30643	-5.79006	-5.65685	-7.96179	-6.96346	-6.00698	-4.60091	-5.51008	0.55434	-3.00576
			-5.61638	-6.94593	-6.94203	-7.41988	-8.8275	-7.39945	-6.88929	-7.77439	-7.05914	-7.71415	-8.63375	-7.74901	-8.4953	-8.68008	-6.42449	-7.20159	-11.4335	-10.0691	-8.6988	-8.99343	-11.0521	-9.00688	-10.731	-10.8141	-12.8087	-11.6902	-9.64723	-9.64547	-8.01532	-3.89978	-7.59629	-8.25399	-9.6528	-9.32182	-10.1824	-9.61101	-10.81	-10.3965	-7.52273	-9.93859	-10.3241	-7.64977	-5.82588	-2.0772	-2.89804	-2.70614	-3.34217
			-1.37348	-2.55281	-2.58008	-3.55031	-2.42331	-3.18162	-3.44078	-3.25614	-3.39551	-5.37804	-3.4959	-3.76963	-2.61988	-0.756777	-0.790885	-2.23586	-1.25927	-6.22279	-5.93746	-4.71436	-4.30435	-4.85817	-6.88579	-4.75603	-5.76703	-5.37784	-4.96582	-4.10741	-5.54277	-5.31509	-5.26738	-7.48391	-6.86768	-8.84006	-7.49863	-8.58702	-6.43884	-6.62545	-5.99993	-8.32943	-4.0574	-6.00625	-3.55812	-4.60122	-1.57822	-2.14709	-4.23806
			1.02613	1.77011	0.920445	-0.884391	1.14077	-2.3486	3.5379	3.83861	2.94096	3.10191	2.37531	2.5255	3.26729	2.58968	2.50148	4.27614	5.44084	7.50412	7.46297	3.13347	5.90302	7.19798	4.86605	4.90958	9.89102	6.84587	8.24068	7.42534	11.4925	8.33792	8.32995	8.13295	7.17284	10.106	8.9892	6.90093	10.7967	10.2673	9.09951	12.6783	13.6935	10.3554	15.8518	15.8081	15.4951	13.3205	17.4979
			-5.57177	-5.08932	-7.28907	-5.87857	-5.92953	-4.43569	-5.60431	-5.26568	-5.83404	-5.33664	-4.05021	-4.24702	-3.30285	-4.43496	-3.49587	-3.56793	-2.94107	-3.20083	-3.94068	-2.18359	-2.76389	-4.15815	-3.57204	-2.61854	-3.64261	-4.26544	-2.57722	-4.2746	-4.29898	-5.17863	-5.0756	-6.32519	-5.30304	-5.48786	-6.00864	-6.11118	-4.96356	-6.37285	-6.31683	-6.63053	-6.91086	-3.22793	1.78156	3.99808	8.69572	10.9517	13.7471
			4.81792	4.12646	6.29525	5.25468	5.45483	6.7129	5.46077	3.62672	5.02042	3.60743	4.38064	4.48314	5.48656	4.942	1.67182	2.11224	4.15244	3.51101	3.13478	3.32079	2.53608	4.63556	3.46183	0.921438	2.19976	1.08265	1.08633	1.70222	0.208669	-0.44462	0.176338	-0.0841357	-0.648203	1.50094	-0.115351	1.14666	0.824595	0.431155	0.429921	-1.72279	-2.49344	-0.250767	-0.423091	4.49405	3.83438	3.51062	2.34869
			-4.00199	-3.28098	-4.4721	-3.07408	-3.58648	-4.17404	-3.84965	-3.14613	-1.64091	-2.57869	-3.66308	-3.83208	-3.52126	-3.79666	-4.10472	-4.67071	-2.8905	-3.38187	-3.05243	-2.82109	-3.50814	-4.97821	-4.39547	-3.98478	-2.89652	-3.74639	-3.25349	-2.7267	-3.27107	-4.01297	-2.95567	-4.13952	-5.48743	-4.47522	-5.40804	-5.77307	-5.22221	-4.50488	-3.57443	-2.29578	-0.308953	-2.64323	-2.88295	-2.28417	-2.42708	-1.80466	-0.989
			-6.91619	-6.44165	-7.15425	-8.24823	-9.20028	-7.57698	-8.70145	-7.22181	-8.27224	-9.06685	-8.93471	-8.83181	-10.9236	-9.85645	-10.4316	-11.382	-9.79772	-10.8919	-10.9563	-10.9724	-9.93582	-9.91938	-9.45623	-9.9936	-10.2999	-9.71889	-10.883	-8.50299	-8.58751	-8.63716	-10.6102	-9.89691	-11.8582	-8.87552	-9.44457	-10.1512	-9.67965	-7.01186	-9.637	-6.64642	-1.91995	-1.7745	-2.91888	-0.874328	-2.54088	-1.22673	-3.97855
			0.0916023	-0.683897	0.152796	0.616497	1.5261	-0.450084	0.281285	0.90598	-0.461547	-1.13142	-1.80508	0.959704	0.159077	-0.321276	0.186153	-0.565393	-1.13057	-0.362872	0.548054	-0.304687	-1.30432	-2.26209	-1.29072	-2.90952	-1.1418	-2.96013	-3.59709	-3.27113	-2.35998	-2.51251	-2.8457	-2.94675	-3.06487	-5.67158	-3.39092	-4.09987	-3.89169	-2.39005	-2.45962	-1.04953	-1.65872	-0.225583	-2.18062	-2.9579	-3.1141	-2.04844	-0.773181
			-4.64622	-3.86545	-3.25556	-3.62346	-3.26505	-4.84824	-4.5304	-4.94655	-4.38794	-2.58665	-5.05096	-4.40935	-3.4923	-3.96874	-3.76366	-4.60448	-2.96959	-3.20403	-2.45962	-3.31009	-3.42444	-2.38193	-2.50392	-2.97108	-3.99839	-3.16362	-1.70557	-2.88874	-2.70432	-0.710858	-1.39591	-2.75352	-1.44381	-1.27371	-1.36144	-1.81724	-0.272839	-1.42744	-2.08557	-1.70312	-0.973546	-0.0752536	-0.731594	0.235917	1.78402	2.65301	3.73051
		session 10	-7.66752	-7.28807	-7.96861	-9.01139	-7.28374	-6.91	-7.22473	-5.56549	-6.61844	-5.06419	-4.63102	-2.77824	-3.61	-3.97939	-3.02529	-2.54066	-2.32854	-2.0443	-1.87212	-2.9164	-2.43027	-4.72831	-4.44435	-5.76497	-6.09921	-6.41625	-6.90383	-7.39499	-7.09986	-9.48845	-8.25071	-8.50741	-10.8311	-10.898	-11.4895	-12.8887	-11.8014	-11.0554	-11.7874	-12.2357	-10.8698	-9.80994	-8.41576	-4.61551	-2.11962	1.16738	4.89806
			-4.93402	-3.88614	-5.39748	-5.44905	-4.7852	-7.60016	-7.91	-5.65152	-5.84605	-2.99846	-7.15112	-5.99916	-4.30297	-4.71682	-7.02772	-4.4999	-1.90319	-1.60434	-8.11855	-5.08689	-2.91697	-3.04344	-4.2238	-3.71914	-5.32888	-4.91273	-4.21756	-5.44127	-5.15436	-5.40075	-4.34643	-4.15039	-3.63093	-4.60033	-2.91351	-2.41687	-0.93272	-4.26172	-3.0335	-1.67652	-2.71644	-1.63459	-3.31333	4.84042	-0.162468	-0.470904	2.54827
			-2.82815	-2.79351	-4.15038	-4.82901	-4.00621	-2.85772	-4.56808	-3.08947	-4.43003	-4.38079	-6.7669	-5.83408	-4.36919	-6.05915	-6.08381	-5.43352	-5.88894	-6.26843	-6.33782	-5.9502	-5.02666	-6.18973	-5.70182	-5.08693	-7.25136	-4.493	-5.57701	-6.62938	-6.06215	-5.25168	-7.3742	-6.635	-8.08035	-7.28928	-8.30861	-6.32861	-6.5795	-8.2311	-7.87596	-6.35366	-8.79523	-4.83027	-4.48496	-4.11703	-4.20827	-6.29055	-3.80046
			0.198843	0.552735	0.409047	1.93875	2.76081	1.82072	1.21749	0.740445	2.39403	1.42079	2.25747	1.83059	0.748544	-0.171689	1.43	0.717608	1.33758	1.46487	3.69051	2.55107	2.64295	3.64	3.45119	4.1964	1.45745	3.75467	0.518411	1.31877	2.02393	0.663717	1.45028	2.45705	0.109096	1.18768	-0.159	-0.736542	0.0560665	0.0241783	1.23179	1.95173	2.52152	3.11094	4.76181	0.901474	0.831766	2.42665	2.30575
			-9.28849	-9.53582	-13.6738	-13.3291	-12.0863	-15.5272	-14.6442	-14.1794	-12.6669	-14.2438	-15.3438	-15.6927	-17.8199	-16.2441	-17.4284	-17.9087	-19.9463	-19.2961	-20.4623	-23.0309	-21.682	-21.0429	-22.9772	-21.7976	-22.8633	-24.1337	-22.2535	-22.3203	-24.9271	-25.399	-25.3707	-25.2438	-24.2112	-24.9907	-24.6917	-25.15	-26.1731	-26.4579	-28.0868	-26.9175	-23.7731	-23.3759	-21.9808	-21.9437	-19.5466	-17.5473	-17.9047
			1.17945	1.86584	0.412593	2.33299	2.69543	3.102	2.07698	0.657313	1.02023	2.24289	1.45993	1.31679	1.63946	1.12155	0.957808	-0.684334	-1.13405	-2.01549	-2.03054	-3.30822	-2.59224	-3.55536	-0.715087	-2.63106	-3.37271	-2.96366	-2.93656	-3.16983	-3.43933	-3.06418	-2.47075	-4.33655	-3.37243	-3.41496	-4.01455	-2.49947	-3.44598	-4.35775	-4.00086	-2.89027	-5.26811	-0.960917	2.2428	3.6331	5.11455	7.3054	8.91666
			-5.73533	-5.10747	-5.09461	-4.97318	-5.14547	-4.56667	-4.20822	-5.4063	-4.71919	-7.17487	-5.35082	-6.91207	-5.2913	-7.74844	-6.7208	-7.00664	-5.68179	-5.83901	-6.05399	-7.52242	-7.91341	-6.5441	-6.4967	-6.2074	-5.49807	-7.71758	-7.0847	-6.91527	-5.48978	-6.08458	-6.34482	-5.67307	-4.59106	-6.84213	-7.66437	-7.5919	-6.60794	-6.39499	-7.86558	-8.54633	-4.53446	-10.603	-7.07884	-6.04394	-7.89047	-5.18935	-5.81254
			-4.71563	-3.9824	-3.95784	-3.25147	-4.38157	-5.0316	-5.16375	-5.19256	-4.87716	-4.90122	-4.06231	-4.07973	-4.71039	-4.70322	-3.41609	-1.37303	-2.86676	-1.74719	-2.56722	-2.77054	-3.47555	-4.07711	-3.95489	-3.72486	-3.76955	-4.20809	-4.46398	-4.19529	-3.03724	-4.33422	-4.41395	-5.53863	-4.34366	-5.79176	-5.12817	-5.3164	-5.44252	-5.01191	-4.70435	-3.34883	-4.06142	-4.97623	-3.77355	-4.81255	-3.92318	-3.39439	-3.29205
			-6.40631	-5.62349	-8.04971	-6.37599	-5.64824	-4.10821	-4.92289	-5.63376	-6.99233	-7.71348	-5.24339	-5.6	-5.98017	-5.68149	-4.16085	-6.61243	-7.07809	-7.74921	-6.41445	-7.95237	-9.44292	-9.30387	-6.87109	-10.0519	-7.67053	-7.73365	-6.92028	-8.65705	-7.63273	-7.9656	-6.66891	-7.13001	-7.3945	-7.39522	-7.08457	-7.09113	-6.94814	-7.77703	-8.58425	-4.93348	-2.45386	-3.07404	-1.21763	-2.18802	-1.32631	-3.41895	-1.12198
			-3.00566	-3.33874	-3.50883	-1.57885	-3.0724	-2.62207	-1.08582	-0.336274	-1.95738	-1.68422	-1.01559	-0.0286595	0.00895289	0.560377	-0.0869556	-0.522435	-0.336087	0.281005	-0.00614172	-0.346145	0.0257287	0.488579	0.597819	-0.389602	-0.608539	0.849402	0.353861	0.317949	-0.270817	0.574098	0.0472487	-0.165335	-1.52962	0.591971	-0.0516583	-1.83105	-0.105406	-1.31166	-1.332	-0.524437	-0.894832	-1.21162	-2.02601	-3.38819	-2.97691	-2.35158	-1.51489
			-5.99014	-4.69236	-5.76311	-4.86848	-5.42865	-5.26047	-5.1371	-5.28691	-6.55029	-5.12851	-5.24429	-5.675	-6.90692	-6.56628	-8.13649	-8.20014	-9.73197	-8.93591	-10.4583	-10.3177	-9.43527	-8.19446	-8.78401	-8.19483	-6.38669	-6.37659	-7.47572	-6.67535	-5.15809	-5.43916	-4.20555	-4.44086	-7.40852	-4.58813	-4.21609	-4.75812	-2.4726	-2.14456	-3.10656	-2.59181	-4.65857	-4.80526	-2.06533	-5.60796	-5.34668	-0.743646	-6.3533
		session
	mean	1	-1.73416	-1.44798	-2.58947	-1.45783	-1.81	-2.67885	-2.98495	-2.95727	-2.85628	-3.27793	-3.21281	-3.41531	-3.72792	-3.02109	-3.72927	-3.0464	-3.21281	-2.68787	-2.93094	-2.97222	-3.54821	-3.17647	-3.53246	-3.72522	-3.55428	-3.65318	-3.07929	-3.46865	-3.35402	-3.59208	-2.83859	-3.59852	-3.50498	-3.18866	-3.44289	-4.77971	-4.60488	-3.93771	-4.14485	-4.52212	-5.45412	-3.31042	-0.396715	1.20127	0.849191	0.780042	2.22755
	mean	2	-5.51056	-5.68836	-4.99239	-5.20873	-5.76375	-4.95606	-4.63295	-4.90494	-4.49833	-4.20071	-4.8899	-4.9742	-5.40224	-5.00484	-5.02179	-4.88876	-4.89894	-4.32148	-4.77004	-5.53626	-5.06129	-5.01779	-4.92286	-4.69566	-4.72156	-4.20981	-4.39275	-4.51264	-5.18513	-5.07824	-3.32223	-4.34079	-4.75352	-4.92317	-4.86675	-5.26871	-5.23156	-5.03306	-5.3028	-4.91123	-3.9445	-0.700272	1.68436	-0.228145	0.726562	2.1253	1.90785
	mean	3	-3.76947	-3.37111	-3.36199	-3.56269	-3.92055	-3.66388	-4.16393	-4.29162	-4.54583	-5.13294	-5.03939	-5.26113	-4.5832	-5.04403	-5.49822	-4.9662	-5.42053	-5.28281	-5.66998	-5.30871	-5.45429	-5.40788	-5.61212	-5.68086	-5.19345	-5.67346	-5.63489	-5.95952	-5.79413	-5.70228	-6.07328	-6.31145	-5.25349	-5.79466	-6.20169	-5.61994	-5.56223	-5.62608	-5.43318	-5.59537	-3.75165	-2.30916	-0.903706	0.618009	0.751818	0.533322	2.02144
	mean	4	-2.80835	-3.08477	-3.42744	-3.54748	-4.54297	-4.34567	-4.55143	-4.94075	-4.94595	-4.89615	-5.0932	-4.63116	-4.37948	-3.71023	-4.97967	-4.60621	-4.84776	-5.17469	-5.39625	-5.05162	-5.26514	-5.36952	-4.91724	-5.29994	-5.14498	-5.32059	-5.1649	-5.51669	-5.50964	-4.94778	-4.762	-4.53695	-4.80731	-5.07994	-5.18055	-5.32306	-5.15394	-5.78862	-5.30532	-5.24247	-1.97019	-1.88422	-0.829419	0.90525	2.10751	1.52072	1.32955
	mean	5	-4.62827	-4.24804	-4.09893	-4.35449	-4.6846	-5.03911	-4.25265	-4.90594	-4.98879	-5.26817	-5.77927	-5.88507	-5.50116	-5.61561	-5.63948	-5.63914	-5.33543	-5.95164	-5.83197	-5.70382	-5.25699	-5.82339	-5.94093	-5.44176	-6.2745	-5.78018	-5.23427	-5.70345	-5.03903	-5.20346	-5.51656	-5.67399	-4.78249	-5.29559	-5.25416	-4.88674	-5.56127	-5.85897	-5.78562	-5.29117	-5.4215	-3.44224	-2.78795	0.672528	1.3727	2.39475	3.96968
	mean	6	-3.71191	-3.17164	-3.00403	-3.84009	-2.96295	-3.26839	-3.48297	-3.76522	-2.87499	-3.56266	-3.44225	-3.71843	-3.68252	-4.37031	-3.73746	-3.87601	-3.65591	-3.49739	-5.01702	-3.86245	-4.16792	-3.83257	-3.60195	-4.13531	-3.78978	-3.23248	-4.18949	-3.77566	-4.33968	-4.99197	-4.74591	-4.79178	-5.194	-4.31208	-4.75647	-5.08945	-5.39106	-4.92286	-4.74555	-3.87662	-4.04619	-1.7368	0.623816	2.17927	2.63672	3.16612	3.9188
	mean	7	-3.83184	-4.33264	-4.89802	-4.80363	-4.84815	-4.87703	-5.08653	-4.83526	-4.73293	-5.64232	-5.45932	-5.68658	-5.88976	-5.7344	-5.89526	-5.95755	-6.17578	-6.53211	-6.22171	-6.43258	-7.21499	-6.95104	-7.20393	-6.97818	-7.18935	-6.90529	-7.37948	-7.68039	-7.60082	-7.33692	-7.25343	-7.53794	-6.8982	-7.26947	-7.45398	-7.29307	-7.2963	-7.89951	-7.00481	-7.67828	-6.44201	-5.35393	-3.90023	-1.82887	-1.11038	0.00655549	1.04126
	mean	8	-1.69097	-1.77637	-1.1966	-2.59536	-1.9665	-2.16908	-2.32551	-4.26245	-2.624	-3.0976	-3.18501	-2.81914	-4.27758	-3.44897	-3.84623	-4.08176	-3.36095	-6.05893	-4.0115	-3.51676	-4.18408	-3.85457	-3.79826	-4.01084	-4.14017	-4.73189	-4.17527	-4.436	-4.154	-4.28015	-3.74988	-4.0755	-4.40516	-3.0594	-4.8573	-6.61466	-4.45762	-4.70185	-5.0729	-3.50352	-5.26775	-2.74707	-2.28326	-1.5051	-0.814615	0.61844	0.389189
	mean	9	-2.64705	-2.63543	-2.72856	-2.98321	-3.04671	-3.38838	-3.18128	-3.23294	-2.84105	-2.94747	-3.43907	-2.88884	-2.76161	-3.15025	-3.11185	-3.63432	-2.83042	-3.14409	-2.86093	-3.37946	-3.2604	-3.32585	-3.59758	-3.80493	-3.51497	-3.83555	-3.34504	-3.43101	-2.84622	-2.93884	-3.11211	-3.95821	-4.38272	-3.86299	-3.92821	-4.27238	-3.67966	-3.60805	-3.66104	-3.15485	-2.54146	-2.05666	-1.06688	0.608083	1.16254	2.39309	2.72631
	mean	10	-4.47209	-3.98449	-5.15843	-4.49044	-4.21651	-4.50576	-4.68795	-4.44944	-4.6585	-4.51144	-4.64471	-4.49566	-4.59928	-4.92624	-4.88129	-4.91493	-5.05074	-4.88674	-5.5119	-6.05916	-5.65878	-5.68672	-5.46545	-5.76108	-6.12649	-5.85011	-6.08735	-6.342	-6.02251	-6.4718	-6.17714	-6.30582	-6.84403	-6.73008	-6.8838	-6.96444	-6.40484	-6.99816	-7.19505	-6.18789	-5.95493	-5.65189	-4.30469	-3.94017	-3.77765	-2.59157	-1.92101
[truncated: 130 more columns]

## Sheet: Fig 3h
		100 ms bins
		trial time	3300	3400	3500	3600	3700	3800	3900	4000	4100	4200	4300	4400	4500	4600	4700	4800	4900	5000	5100	5200	5300	5400	5500	5600	5700	5800	5900	6000	6100	6200	6300	6400	6500	6600	6700	6800	6900	7000	7100	7200	7300	7400	7500	7600	7700	7800	7900
		session 1	-9.31774	-7.25388	-7.08349	-4.07214	-6.38037	-5.87705	-6.66484	-6.957	-5.43125	-4.82109	-5.76276	-6.54223	-7.09134	-5.56232	-4.9716	0.655645	-4.30129	-6.30693	-6.2953	-4.79279	-5.71863	-4.08507	-6.52446	-3.3203	-5.12867	-4.00736	-5.813	-2.79394	-6.26035	-5.54302	-7.13501	-6.14144	-6.47807	-7.41484	-8.75376	-7.26214	-9.05292	-7.8702	-9.66582	-10.4266	-9.76711	-5.57984	-8.1551	-6.35371	-3.67246	-3.68774	-1.70291
			-2.15958	-4.46441	-2.64149	-1.54565	-5.48296	-0.55975	-3.36112	-4.90822	-4.6607	-9.18661	-8.6982	-6.52381	-8.58682	-3.50116	-7.39818	-2.88022	-2.8202	-6.88901	-9.73535	-2.61326	-4.47859	-7.57141	-5.38982	-7.38137	-4.18719	-4.25569	-3.65017	-2.09854	-3.87445	-2.98524	-5.30671	-6.00746	-3.86102	-4.15832	-7.13436	-6.0565	-1.83473	-0.151702	1.4079	1.40092	-0.780892	4.21478	10.8305	9.82833	9.39642	13.0868	13.1768
			-6.86191	-7.14065	-5.099	-6.00705	-5.26049	-5.7801	-7.07873	-5.89178	-5.81477	-6.15907	-4.68075	-4.51734	-5.73844	-6.50962	-5.39258	-6.06334	-5.20169	-4.90129	-5.76179	-5.5439	-5.2193	-4.8573	-5.45291	-4.28341	-3.98238	-7.47254	-7.01378	-8.62042	-7.02372	-7.63975	-7.81987	-8.03909	-6.05686	-7.8469	-7.97439	-8.41299	-7.2636	-8.10914	-8.24669	-8.01306	-7.04712	-6.70105	-8.33804	-3.23114	-0.104175	2.0388	3.6866
			0.541341	0.855067	2.50116	2.98845	1.85901	3.7496	2.53208	5.32467	5.64975	6.57809	4.41544	3.4894	4.61852	5.07226	4.43642	4.07239	6.30063	5.49297	3.70757	4.60286	7.07353	5.68213	6.50237	6.78549	6.92905	8.09846	6.54597	5.11425	7.31917	6.53242	6.73342	9.72723	5.12153	10.3162	7.84825	6.10169	11.7562	7.67498	7.37747	13.6188	10.9811	8.19129	8.35629	9.59022	5.09717	7.96868	5.82765
			-1.0615	0.880395	-1.28085	-5.21266	-4.88087	-5.12186	-3.84972	-4.97553	-4.19751	-2.81505	-3.41567	-4.01708	-3.36197	-2.49846	-2.50905	-0.0148032	-1.4981	-1.37388	-2.50074	-2.17378	-1.70483	-2.76225	-2.31169	-1.40449	-1.32175	-3.02216	-2.09657	-1.70438	-2.24641	-1.29616	-1.37825	-3.88193	-2.03271	-0.980187	-3.60426	-2.06932	-2.35687	0.942009	0.960223	-2.34591	-0.453831	1.89719	7.11012	11.3234	13.9225	13.5195	16.0553
		session 2	4.85982	3.60419	4.664	2.43126	1.66154	4.52086	4.60282	5.1417	4.39335	4.59016	4.70424	5.48753	5.10075	4.37823	3.3041	3.08595	4.37847	4.48565	3.51761	1.11488	1.5689	1.79354	-0.143425	0.671485	1.43589	0.82512	-0.326782	0.021361	-1.9017	-2.13202	-1.95868	-1.76559	-1.15584	-1.39031	0.276474	-1.87814	-0.808704	-2.88509	-1.63772	-2.01911	-0.148417	1.83379	2.96712	5.33177	7.08371	8.22346	10.3206
			8.50546	5.13788	7.29407	8.27554	3.02259	1.93475	5.48645	5.47642	4.4085	2.86745	2.23227	-0.117231	3.34922	2.41452	1.93327	1.68464	5.2697	3.26658	2.53196	2.29757	0.938893	2.60976	-2.05033	-1.14391	1.77948	0.377069	1.02191	3.39776	1.58624	3.78273	3.18078	4.4763	4.56831	1.68075	7.76537	7.97739	5.21637	3.99371	2.95008	2.94791	3.99477	10.5256	18.148	20.7361	22.2514	26.1011	25.3423
			3.72555	6.18018	3.47447	4.54721	2.0257	-6.25236	-5.89132	-0.00931338	-3.44115	-3.81331	10.5628	10.7894	0.852699	-1.19558	-1.93027	-2.54648	-3.54779	-3.73458	-4.12306	-3.57971	-5.66339	-6.48148	-7.06035	-5.90345	-5.85349	-8.17823	-7.49351	6.2071	0.956219	0.146259	14.3593	-6.2609	-6.9119	-7.00493	-7.1889	2.85989	-3.97125	-5.67813	-5.70059	-3.69063	-2.73786	-2.48534	0.346621	-1.57724	-0.504014	3.38819	4.02529
			6.16289	6.75276	4.36974	6.28716	6.40754	9.01772	5.20043	6.56244	9.75227	5.81381	8.03683	5.22591	4.88003	3.44848	2.91587	3.41995	2.70937	5.99879	2.9099	4.36852	4.15015	5.9933	5.62781	3.94681	5.02332	8.12131	7.569	5.85051	6.39706	5.58583	4.24273	7.27621	5.3799	6.75087	6.78985	5.73897	3.50421	4.3793	5.16002	5.2585	3.56639	0.590663	0.560971	2.23262	3.43275	3.41106	1.66026
			-5.30836	-3	-6.08293	-3.62454	-4.33022	-4.60496	-6.601	-6.90324	-8.38784	-7.8834	-9.59563	-12.2655	-9.30066	-8.53913	-7.77406	-5.15656	-4.16486	-2.91642	-2.91253	-2.19798	0.378642	-0.311968	-0.527415	-0.906696	-2.40478	1.31001	3.52698	0.726191	0.0216854	-2.17462	-0.462564	-2.30035	-1.2679	-2.14423	-2.98933	-4.01956	-6.75109	-7.60711	-6.52679	-6.20093	-12.6107	-7.37781	-8.69657	-12.6349	-11.6452	-13.7661	-13.9074
		session 3	-6.68523	-6.18225	-8.17373	-8.19246	-7.59598	-6.97636	-8.46988	-8.76931	-9.81701	-7.61821	-8.56767	-6.61548	-7.74558	-8.33316	-7.56527	-7.41137	-7.91051	-7.11394	-7.78839	-8.63683	-9.30733	-7.81255	-6.42143	-6.46991	-6.302	-8.88913	-7.44834	-6.29123	-6.49883	-9.24964	-8.59493	-8.63004	-10.4448	-7.75426	-7.74086	-9.73453	-9.26586	-10.4274	-9.28899	-8.04706	-10.8042	-4.596	3.31553	1.70933	6.24231	8.66819	10.9188
			-1.85404	-3.3146	-3.5636	-1.08153	-2.55615	-0.66868	-2.22354	-2.84095	-4.96864	-3.36718	-5.52299	-3.44147	-3.95035	-5.1147	-6.44086	-3.35467	-7.33755	-4.4767	-3.72917	-2.53225	-6.213	-3.2839	-5.83401	-1.42474	-3.40572	-4.9114	-7.32907	-5.4328	-1.69505	-3.93852	-2.80069	-6.38234	-5.94336	-6.50318	-6.43293	-6.4903	-4.39991	-6.28476	-7.89307	-3.26274	-5.04201	2.06887	5.998	5.944	8.92724	13.5478	12.839
			-1.99971	-0.911723	-0.896998	-3.10755	-2.05819	-1.25795	-3.0106	-1.13398	-3.40038	-3.02192	-3.99533	-3.01585	-4.29503	-3.42528	-2.6139	-1.50017	-2.58078	-2.56751	-2.97485	-2.91832	-3.25831	-4.03057	-4.79878	-4.12578	-2.82024	-4.77283	-5.58123	-5.94608	-4.8133	-4.76998	-5.14241	-5.5522	-5.44335	-7.00288	-5.45383	-6.10568	-4.27766	-4.38481	-4.35328	-4.63932	-1.46328	-1.71307	2.15383	-0.42714	0.244397	3.79181	4.39959
			-10.0057	-13.2233	-12.6118	-16.0737	-11.9493	-12.2279	-11.8233	-13.393	-12.8071	-13.6132	-15.6527	-12.788	-12.8904	-13.9218	-14.1539	-12.7136	-14.1584	-14.7947	-13.0982	-15.9274	-14.5783	-15.4051	-14.1539	-15.693	-14.2525	-13.5075	-14.4561	-16.1545	-17.3093	-15.2704	-18.0765	-16.8065	-18.5577	-19.5143	-17.5847	-20.6252	-15.8394	-21.3485	-18.2478	-22.3801	-22.4208	-16.8493	-20.2914	-19.6844	-18.6115	-17.8593	-21.6339
			2.45752	2.5367	2.12471	0.101929	0.71349	1.11678	2.23855	0.810596	-0.118565	-1.71926	-1.38696	1.33655	-1.07162	-2.97602	0.149022	-1.91054	-0.085261	0.206838	-1.14051	0.0326924	-0.256722	-2.23128	-4.20766	-5.19919	-3.36881	-2.39932	-3.08052	-6.44166	-2.70079	-3.61108	-4.48567	-4.09065	-1.53356	-1.54376	0.0723006	-1.42311	-4.37194	-0.6103	-2.62535	-3.48537	-4.47583	-7.07655	-1.44834	4.55338	4.53963	5.69049	5.5705
		session 4	4.85672	2.59139	2.0061	2.24218	2.50116	4.03752	2.61037	-1.10545	2.77853	0.0526276	1.03431	3.52344	0.896804	2.95648	2.6348	1.02117	-1.67518	0.34358	-0.505468	-1.90932	0.678998	2.23568	0.526117	-0.541399	-2.9928	0.447364	0.721972	2.49167	1.80443	-0.00919252	-2.34577	2.68923	-0.320394	-2.21457	0.0382253	-2.07904	1.81296	0.408827	0.630436	0.599204	-1.51579	2.06311	6.29273	9.90876	18.8096	14.1331	18.8235
			-5.76526	-5.77516	-4.03391	-3.76803	-3.37731	-4.5651	-4.74649	-5.76406	-5.48244	-3.88132	-2.93192	-2.15652	-3.09551	-3.48889	-3.21694	-5.18718	-4.56526	-5.87566	-5.65389	-6.09968	-7.45053	-8.56245	-8.52642	-7.20707	-4.44471	-7.84757	-4.84459	-3.77624	-5.69968	-0.563289	-6.0754	-5.99346	-5.55553	-3.10017	-4.84903	-4.11234	-3.94711	-5.58066	-4.78115	-5.48024	1.25159	5.52794	6.96045	9.14421	13.4351	11.3841	15.5448
			3.31893	3.4697	2.35382	1.93439	1.86633	1.24552	2.3479	0.858117	1.96783	0.859361	-0.0504914	0.495862	1.31049	0.947239	-1.31132	1.19068	0.818598	0.875688	0.88341	0.129651	0.749095	0.26163	1.52233	0.697842	-0.2706	1.61142	0.769394	2.25687	2.46175	3.52174	0.54762	3.04193	1.33985	2.42714	2.28559	2.73585	2.88513	3.51366	3.28896	3.88817	5.83645	6.53357	5.71729	5.65565	6.65248	7.615	8.89768
			-5.21256	-7.63052	-9.08893	-6.83399	-5.65679	-6.06745	-7.20264	-6.31644	-4.55465	-5.12232	-5.08861	-9.86874	-8.91465	-8.45041	-7.49423	-7.73262	-7.8025	-3.68826	-5.721	-8.79704	-8.07942	-7.08245	-10.0407	-5.49525	-1.23117	-6.15022	-6.20403	-2.92696	-4.50071	-6.00794	-9.06688	-4.58118	-6.22957	-1.83404	-4.82389	-9.13112	-7.41413	-7.43903	-5.56708	-5.42715	-13.1513	-6.71639	-2.79103	1.34065	11.6628	3.75673	14.2052
			3.67851	-1.97874	-0.156353	-5.26221	-16.3054	-0.891607	-0.556238	-1.88395	2.27585	-2.51993	-6.93802	-1.01018	-4.05229	-5.50335	-3.07322	-16.2678	-7.25037	1.43473	-11.4261	0.089141	2.02207	-6.95931	-6.78498	-4.89541	-0.510559	-3.22446	-5.94146	-6.26104	-6.2714	-6.68998	-13.4306	-4.36144	-4.12588	-3.79467	-8.10216	-10.0829	-9.39792	-10.8017	-9.17823	-6.73755	-9.99505	-9.22374	-1.22543	-6.5412	-7.06741	-1.86188	-4.27706
			0.298829	2.10134	0.643442	1.51515	2.63204	1.48675	0.656251	1.23768	1.25815	0.386849	-0.101291	1.45048	1.87362	1.14911	1.80418	1.25137	-0.929772	-0.104118	0.324418	1.47642	-2.03788	0.184887	-1.71412	0.160018	0.835593	-0.0187044	1.09421	0.548254	-1.27524	1.0985	-0.720216	1.5806	-0.723362	-0.321359	0.991697	-0.493781	0.0991998	-1.357	-0.964018	-2.1644	1.80445	1.29023	5.5847	-0.200154	2.02679	1.84017	0.772398
			-7.69146	-8.3534	-7.13145	-8.40052	-9.75004	-6.60102	-6.99286	-6.97887	-8.78835	-9.40545	-10.5481	-8.84098	-7.58665	-9.97456	-10.8255	-9.53007	-12.9902	-14.6387	-13.2584	-13.9114	-14.1707	-16.3158	-9.84292	-10.9217	-11.1628	-13.041	-13.4366	-13.1386	-14.4128	-14.898	-13.1022	-13.1294	-13.6052	-9.30765	-13.8514	-9.40605	-9.28271	-10.7267	-10.203	-13.3008	-12.201	-8.42059	-10.0341	-6.81352	-7.05153	-4.16923	-3.99296
		session 5	2.51331	4.26291	3.22328	3.96247	2.21226	3.75924	3.87387	7.05382	4.86358	9.85957	4.85931	3.58949	3.13049	2.0429	5.64104	3.96871	4.45934	1.6676	1.25948	1.05627	0.969826	2.54015	0.299834	-0.61063	0.252178	3.06359	1.47009	0.680192	1.78176	-2.08603	2.67311	2.33497	3.0428	0.588778	2.19507	-1.19977	-0.829263	1.66276	-3.02424	0.333693	7.95544	2.71075	10.8067	16.1212	18.1413	14.9272	17.9488
			-5.77449	-2.0847	-3.68844	-7.45152	-3.36355	-3.5826	-6.64268	-4.01835	-4.96776	-2.01317	-8.66998	-5.57691	-5.10311	-6.83376	-8.43273	-6.17685	-7.56547	-7.06899	-6.92147	-7.50676	-6.52731	-11.0412	-5.76087	-7.23135	-9.51846	-10.6888	-10.283	-9.24415	-8.62391	-8.00781	-11.4463	-7.76755	-8.54944	-11.5688	-8.5714	-8.45167	-10.0836	-9.1524	-10.123	-10.3624	-6.49433	-2.81853	6.73682	12.6158	13.1376	16.0941	16.3677
			-2.97474	-3.52838	-3.93641	-1.79953	-1.92077	-1.74223	-0.959751	-2.9797	-2.35451	-1.61096	-2.33454	-3.64131	-1.65906	-1.59539	-2.94354	-0.818504	-0.225647	-0.959733	-1.78167	-1.84144	-2.23947	-0.186242	-0.414929	-1.72577	-1.67339	-0.00287214	-0.617802	-1.78004	-4.45979	-3.31194	-4.18612	-4.407	-3.60253	-4.26325	-5.45074	-4.04071	-3.8889	-4.22383	-5.59505	-3.61339	-3.70607	-4.23098	-1.20924	-1.77343	0.353803	-0.0346088	1.41106
			-0.299797	1.58144	-3.03557	-4.83939	-1.76993	-3.12456	0.057876	-2.64301	-1.63681	-1.9495	-2.725	-2.42729	-3.08487	-4.24418	-3.15946	-5.32752	-3.66755	-3.96461	-2.33183	-6.07943	-5.30331	-4.86545	-2.70814	-4.64031	-5.24596	-6.9693	-7.89011	-6.9631	-7.77738	-10.3579	-5.14127	-7.77334	-8.90364	-5.10355	-5.36643	-5.39646	-5.76615	-5.23965	-4.4738	-3.82854	-6.78665	-7.98376	-2.94448	2.55039	4.66087	7.23236	5.98698
			-1.94019	-3.04201	-1.83888	-1.46829	-0.336892	-1.81416	-0.58298	-2.77845	-4.31606	-3.11291	-2.47523	-3.11544	-3.1359	-2.74632	-4.05211	-3.34683	-2.50393	-3.10939	-1.35645	-2.73171	-2.63838	-4.31694	-5.60869	-2.3178	-2.23325	-3.09195	-1.21602	-1.35126	0.469861	-0.661111	-0.580514	-2.08932	-0.675482	-0.47263	-2.39007	-3.1105	-3.0139	-3.28305	-3.78443	-2.79429	-9.44262	-8.31313	2.21043	1.04046	-2.38964	-1.69838	-4.5277
			-7.80261	-3.64399	-2.54161	-3.82893	-4.92529	-4.59616	-3.89468	-5.77796	-5.29266	-5.53402	-3.66587	-3.7259	-2.27929	-3.03564	-4.11845	-4.32748	-3.63171	-4.04369	-3.63616	-2.98266	-6.54944	-5.84764	-5.03598	-4.95142	-3.99164	-5.00617	-2.88736	-5.86142	-5.61287	-3.67835	-3.70314	-5.76706	-5.80358	-4.72647	-4.95346	-5.60184	-6.70041	-6.24834	-7.21641	-7.05419	-5.45902	-9.32344	-6.699	-6.41574	-4.36041	-6.28516	-2.75831
			-12.6308	-11.1477	-11.8906	-13.6326	-13.1892	-12.5855	-12.354	-14.5177	-13.1912	-15.303	-13.951	-13.9489	-14.9113	-15.872	-15.3995	-14.1911	-13.5277	-13.9831	-13.0939	-14.519	-13.0765	-12.3993	-14.4986	-16.3754	-15.631	-16.2082	-15.3882	-17.373	-14.9196	-16.4849	-15.069	-15.1747	-17.0401	-18.4804	-19.8288	-18.7274	-19.4005	-19.8489	-20.2843	-18.9592	-21.4618	-16.22	-14.3337	-13.6839	-10.9235	-9.05693	-8.3143
		session 6	4.88555	3.15805	3.57927	3.70291	4.30541	7.04895	2.38614	0.437194	0.850285	1.8872	1.55478	3.70194	2.85017	2.03167	-1.40596	0.144361	0.262743	-0.187826	0.302686	0.827726	-0.435405	-0.262905	-1.35586	1.39159	0.188199	1.44993	-0.36359	0.565232	1.0317	0.173189	0.144503	1.28567	0.894507	2.47018	1.29113	2.36159	-0.0955094	-0.298898	-1.28823	-1.32844	-7.32937	0.891753	11.0598	9.64868	18.2022	20.7259	23.7429
			2.59828	1.193	0.594038	0.953237	1.88726	3.74646	-0.723616	-2.29373	3.56929	1.68099	1.31012	1.13877	1.81148	2.00669	-0.306647	-0.560826	1.22676	1.95654	-0.326952	-0.67668	1.80067	-0.359121	-0.574636	-1.9012	-0.788405	-2.91819	-1.88743	2.20279	0.0294334	1.74482	-0.881458	-1.77671	1.81861	-0.0876874	-1.28779	1.87321	1.43453	-0.000638937	-1.18576	1.66165	3.25748	5.66153	12.1135	17.4657	20.4072	25.2326	25.2149
			-1.91663	-1.34403	-1.24236	-0.940798	-1.42708	-3.13045	-4.03025	-3.59514	-3.12237	-3.64111	-3.42452	-3.26913	-3.19758	-1.11919	-1.64707	-1.14408	-1.77699	-1.06021	-2.16658	-3.15072	-1.97043	-3.48391	-3.57259	-4.10752	-2.8287	-3.0267	-3.04634	-2.53512	-3.22173	-2.0859	-1.42471	-1.86577	-1.77462	-1.2727	0.638087	-0.163077	0.404735	2.85978	1.5324	3.11593	4.42843	5.06488	3.85883	6.86977	7.53933	6.6297	9.23317
			3.33713	-1.99413	-2.92521	-2.21604	-6.4591	-7.02435	-11.076	-7.65562	-8.96901	-9.59322	-10.0248	-6.8461	-10.1019	-7.58111	-6.32042	-6.1363	-7.20605	-11.442	-11.538	-10.6989	-7.88807	-3.62237	-5.90768	-8.11452	-10.4026	-12.837	-8.64537	-10.5185	-9.36355	-7.83989	-10.6022	-12.7376	-14.8985	-13.1332	-14.153	-18.2596	-18.674	-14.8561	-17.3447	-9.7488	-17.9987	3.04449	-4.99975	1.98581	-2.4781	7.12701	5.32388
			-8.45392	2.7869	3.94631	0.605406	1.77494	0.698282	-5.237	2.69129	7.13071	0.126779	7.0051	7.97906	1.57347	1.63	-7.18226	4.88989	7.3922	8.74014	5.57263	7.25102	5.60579	0.66631	-2.97587	3.91178	-1.21854	6.15025	4.57391	-10.0075	0.157074	3.22744	6.68439	11.2741	1.35705	4.70731	0.654209	-3.55022	0.648208	3.15234	0.66396	4.5862	3.11348	12.1652	2.88442	4.229	2.43403	2.54595	0.498369
			-5.52466	-7.36282	-6.48306	-5.71839	-4.53083	-6.31361	-3.64494	-7.42426	-7.09998	-5.81624	-4.96246	-4.77388	-6.0684	-6.39758	-6.11714	-7.2813	-8.19628	-7.59502	-8.4324	-7.03316	-6.22879	-7.02808	-5.6365	-9.4556	-6.16898	-6.07368	-8.16923	-7.16851	-6.76735	-6.35052	-8.45233	-8.24019	-10.2301	-9.24193	-5.51714	-9.5934	-9.42828	-8.35367	-8.84245	-9.57816	-12.8736	-5.06331	-8.3844	-6.70128	-7.09497	-8.34952	-6.49168
			-3.25021	-4.39711	-6.13949	-2.7146	-2.61458	-6.12822	-6.32465	-4.71204	-5.30227	-5.39192	-6.42479	-4.14549	-3.66948	-2.96101	-2.30622	-4.58151	-3.56678	-4.10299	-4.09022	-6.31286	-3.64618	-6.55979	-5.013	-5.06814	-3.36368	-3.90052	-5.79463	-4.68448	-4.37743	-2.74414	-4.88956	-5.5308	-6.53673	-5.35318	-5.29036	-4.87546	-3.86243	-4.22369	-5.575	-2.96951	-4.07111	-2.9737	1.55403	4.83156	5.60645	8.97438	9.84607
		session 7	-1.59523	0.854552	-2.53968	-4.5346	-0.634164	1.29163	1.57716	1.34868	5.07767	3.67011	2.66452	3.44306	1.61803	4.30521	2.15655	1.7065	2.01865	2.93592	1.42798	6.28273	2.13863	2.84695	8.77079	2.37519	2.71799	1.409	4.01171	2.71155	0.576415	0.663825	-1.04049	3.33259	0.127528	7.01089	3.63418	7.91789	3.16168	3.02203	1.90871	1.40382	2.9326	4.86089	13.2738	17.6503	22.4572	26.3025	24.7443
			0.10065	-1.36469	-3.04846	-0.780531	-3.28564	-0.570695	-2.45175	-3.76914	-2.64055	-4.34778	-5.2885	-2.41803	-1.57869	-2.8916	-2.97681	1.18898	-1.0607	-2.01728	-2.06398	-1.94466	-4.34421	-4.67717	-2.70876	-1.78234	-3.43421	-1.12214	-4.02583	-3.8675	-5.8241	-6.24529	-6.33712	-3.98816	-4.76131	-7.14925	-5.85695	-1.97307	-0.723737	-3.98085	-5.00022	-2.08074	-4.36539	0.873005	3.89722	8.28873	12.3076	11.4587	14.9887
			-5.81416	-3.46566	-4.95638	-6.22168	-6.70192	-5.19607	-6.45885	-3.2307	-3.91482	-4.05186	-4.589	-4.49766	-4.47812	-3.66311	-4.95688	-3.41427	-4.89854	-3.8968	-3.49561	-4.00567	-4.85194	-6.03697	-5.27946	-3.51729	-4.3597	-5.65549	-4.11382	-6.08736	-4.78509	-5.64775	-6.53373	-7.6296	-6.75432	-5.44117	-5.11043	-4.19224	-6.19348	-5.594	-6.21917	-3.69653	-2.10535	-3.36928	-1.5038	-1.80875	-2.94427	0.084514	0.235534
			2.5539	2.60431	2.79677	0.132514	0.0086305	3.60423	4.7785	2.51081	1.07502	1.89639	-1.85466	3.10895	3.58189	5.10136	0.522333	-1.64959	5.08274	8.96971	-0.545623	4.64796	1.0814	2.15455	2.23522	1.10089	-0.113883	1.4688	3.04306	2.7409	3.29935	1.4603	1.8351	3.16179	2.49435	2.74632	1.55804	4.81755	2.49915	-2.67524	5.09915	21.8027	3.45505	-2.67554	10.3603	9.25772	3.95486	5.00375	5.35503
			0.960246	-0.323126	-1.20307	0.821555	-0.52837	1.60226	1.43102	-0.447942	-1.53058	-0.218761	-0.621038	-1.52937	-1.18799	1.86012	-0.733739	1.10401	-0.705454	0.0917941	-0.157008	-2.17139	-0.165106	-0.272996	0.984773	2.56019	1.46277	0.18616	-3.70406	2.80233	-1.30301	-0.749788	1.11073	2.86945	0.372832	-0.417825	0.453141	0.616098	0.899911	-2.47523	-0.918332	-2.52013	-6.13008	-0.128745	-2.86748	-3.11639	-4.11882	-1.35934	-1.66171
			-10.349	-8.20428	-9.93174	-8.48336	-8.76964	-7.52972	-8.57208	-8.08044	-9.8711	-9.89551	-8.63019	-9.30313	-7.58919	-8.23525	-6.97306	-9.85375	-9.39263	-8.4341	-7.17398	-6.75397	-6.42518	-6.61934	-7.97157	-6.87178	-5.47813	-8.46035	-9.75791	-9.87146	-9.91361	-7.9088	-8.70795	-8.48274	-6.9597	-8.3792	-6.4974	-8.48949	-10.1336	-10.8173	-10.7686	-11.3008	-12.6702	-7.95047	-3.47774	0.036075	4.11518	7.75756	8.58253
		session 8	-8.51134	-6.33731	-7.96502	-10.3036	-10.0374	-11.2229	-13.1299	-11.0832	-7.86726	-10.0809	-14.1314	-8.12285	-10.8597	-11.1385	-12.5202	-6.52106	-9.40345	-9.13809	-10.4479	-7.32997	-9.74103	-9.95438	-10.3148	-4.31279	-7.29507	-6.0104	-4.32443	-3.69183	-5.87336	-5.39818	-8.72316	-13.8124	-10.2412	-5.48619	-6.64752	-7.32145	-10.7449	-5.77696	-3.39516	-6.87569	-9.49654	-7.47316	-0.744589	-2.43268	0.383613	3.93773	10.151
			-4.79274	-3.46607	-0.481299	-1.9869	-5.35884	-1.99494	-3.37527	-2.18469	-3.35133	-2.90514	-2.55754	-1.10479	-3.50206	-1.57814	-1.79028	-0.478361	0.066435	1.26675	-0.567944	-0.329324	-0.645804	-2.55916	-4.61869	-2.64744	-3.08651	-2.21374	-4.73813	-5.68049	-1.52321	-0.75442	-4.40185	-4.90183	-5.69139	-1.89165	-5.98318	-4.60694	-3.65469	-3.62141	-4.1057	0.560656	-0.605833	3.27841	8.09101	15.0338	20.7626	21.3444	23.5148
			-0.587988	-0.777538	-0.627695	-1.37706	-1.50475	-0.311433	-0.33125	-1.35102	-2.74435	-2.27831	-0.842984	-1.77265	-1.44414	-1.9793	-2.07746	-0.305438	-2.02256	-2.12193	-2.55825	-1.3763	-1.91997	-1.57321	-1.90245	-1.66377	-1.61477	-3.19424	-2.71169	-3.05297	-2.93827	-3.47166	-3.82717	-2.79404	-4.46219	-4.62898	-2.39148	-4.87492	-3.71942	-3.47377	-4.54344	-0.281168	0.106804	0.471418	2.53785	1.53956	1.72416	2.9243	3.21523
			-4.86174	-0.269932	-5.83161	-7.54	-5.36525	-4.3168	-3.48635	-3.59	-3.63273	-3.50569	-1.46842	-1.67736	-5.34978	-4.89586	-5.03468	-0.910614	-5.06593	-1.86537	-4.46319	-1.69463	-2.01754	-2.85565	-0.689729	-1.09492	-3.13933	-0.31754	-4.89359	-2.24099	-2.52633	-1.17018	-0.180842	-1.56533	-1.32285	-2.74715	-2.36646	-4.98508	-3.22027	-4.03707	1.49448	-1.65125	0.829366	1.58018	-0.363067	-0.444031	-0.918311	-1.39613	-0.969463
			-4.42749	-3.14986	-2.45315	-6.10147	-6.35855	-2.81792	-5.0248	-12.6249	-2.93238	-3.72228	-4.97647	-4.42703	-5.07089	-5.47389	-5.50955	-4.30193	-1.41792	-3.4721	-5.03693	-1.6766	-0.394199	1.96658	-4.13213	-7.15092	-2.77277	-8.72121	-1.48858	2.27637	4.83124	2.66621	1.63967	-1.66417	-6.65385	-5.43781	-5.14695	-4.59752	-6.29523	-6.64581	-6.41657	-3.65312	-10.1748	-1.23253	3.3025	-2.20358	-6.64354	-5.88466	-4.16336
			-0.15574	-0.187698	0.439563	-0.647635	-0.668948	-1.60152	-0.816431	-2.15067	-1.13183	-0.358709	-1.57954	-0.444757	0.460004	0.11417	0.255797	0.0359972	0.402553	-0.0484246	-2.44805	-2.94223	-4.06095	0.493944	-3.35668	-4.18774	-4.62483	-5.3551	-3.34136	-3.53471	-5.22559	-5.69336	-6.16191	-5.42584	-6.77316	-7.94344	-6.65289	-6.91287	-6.76553	-7.37893	-3.62498	-3.06735	-6.3912	-11.9214	-7.75063	-5.87837	-2.62176	-2.44737	0.891357
		session 9	0.32431	-4.22973	-2.02449	-4.2383	-0.988307	-3.24312	-4.0936	-4.37479	-4.9477	-7.04384	-7.02687	-7.56059	-5.02515	-5.66322	-3.56835	-7.46939	-4.64693	-7.73431	-6.88891	-4.76214	-1.90271	-0.275031	-2.17297	-4.36562	-2.32248	-5.02743	-4.53262	-7.44628	-3.74675	-7.96805	-10.0486	-3.07907	-11.0359	-4.94985	-9.42893	-7.86986	-10.7043	-13.1738	-7.09847	-13.5375	-4.748	-4.65022	-8.73701	2.91586	4.58138	12.9616	7.74594
			4.79856	2.79187	3.34833	4.81317	4.74432	3.0736	3.66483	2.25623	2.94188	2.70887	3.64951	3.441	1.48014	3.18559	2.06533	3.67068	2.78567	1.30061	2.25533	-0.683468	1.37403	1.46654	0.796085	1.83495	-1.60421	-0.405767	0.218893	0.166319	-1.57616	-0.326518	-0.230619	-0.87274	-0.20596	-1.03919	0.121302	-2.55861	0.86007	0.378801	-1.87844	-1.45883	0.234117	0.453728	6.43985	9.02063	16.6575	19.1749	22.7827
			-4.07994	-6.7804	-4.14153	-2.9058	-3.85718	-4.00709	-1.56336	-2.47889	-1.52635	-0.603851	1.55192	-0.615318	-3.31269	-1.09937	-3.93311	-4.34217	-5.01977	-4.15371	-5.031	-5.65986	-5.17974	-3.54266	-5.86382	-2.14814	-6.24266	-5.8738	-7.25922	-7.29769	-6.29918	-7.6921	-7.22768	-6.40881	-7.79648	-7.73362	-7.39465	-11.1555	-9.42154	-8.08187	-6.14473	-2.68421	-3.27484	3.40452	8.8924	17.1185	16.8563	21.5392	18.7094
			-4.18348	-3.66576	-4.80396	-3.53868	-3.99749	-5.59467	-4.02816	-4.66221	-1.65192	-4.36589	-5.65717	-4.13436	-4.71333	-5.26104	-4.04698	-4.73605	-5.46828	-2.95578	-6.58458	-5.36273	-4.16048	-4.55032	-4.80923	-5.30466	-5.06264	-6.15455	-4.95594	-6.37897	-6.78595	-8.31606	-5.46429	-6.74476	-6.10318	-7.69474	-6.19124	-7.21219	-7.34101	-6.80166	-7.25762	-5.22799	-6.1489	-3.06326	-4.39586	-3.76816	-5.19106	-3.80713	-3.06345
			4.93309	7.51635	3.9225	3.39071	5.62689	6.442	4.41322	4.11956	5.25612	3.63242	3.24344	3.88505	1.76991	5.37991	2.68919	5.14215	4.87678	3.92117	3.5675	6.54441	7.83879	4.20455	4.38867	6.71223	2.94909	2.05806	5.49563	5.34276	7.77906	5.27714	5.69594	3.91615	4.75749	4.96472	5.47288	5.87663	2.03771	5.56368	7.42933	7.53827	5.2678	7.94494	6.29548	6.32656	6.43315	4.19763	7.4566
			12.072	10.5902	12.1672	13.1541	12.1894	11.8229	11.5514	12.463	13.2276	13.0321	12.2805	11.9576	14.3887	12.5974	12.4776	13.5485	12.9375	12.5934	13.9736	15.4372	14.8126	16.6046	14.3624	13.4461	13.9427	13.4974	12.2094	15.3905	15.5718	14.6075	16.5389	13.0369	16.1813	16.0226	12.639	14.7587	15.9001	16.1964	16.4459	12.8488	10.4993	13.6494	12.8175	13.9856	13.0066	15.4985	14.1559
			-7.00684	-7.1604	-7.70532	-7.8622	-8.13625	-6.01231	-6.60071	-6.06558	-5.16574	-5.45356	-5.82994	-6.28711	-8.13748	-7.77256	-7.28245	-7.85079	-6.80448	-4.11311	-7.02806	-3.3024	-4.2357	-4.58462	-6.23595	-5.2019	-4.91831	-5.86133	-6.87182	-9.03124	-6.8595	-7.29245	-7.70968	-8.994	-8.87533	-9.85209	-6.67824	-10.6621	-8.70256	-7.29453	-8.25588	-10.0539	-9.73225	-7.08708	-3.87975	-1.3707	-0.0606545	0.412453	3.27358
		session 10	-4.47958	-4.9416	-4.52401	-4.37022	-6.61806	-2.23268	-4.53507	-6.49113	-4.95249	-4.31947	-5.21861	-4.39615	-7.34672	-6.25926	-7.37486	-8.66062	-8.58563	-8.07018	-8.05462	-7.16706	-9.39153	-8.55467	-7.85392	-9.00034	-10.1065	-9.17168	-7.92733	-7.47888	-8.48326	-8.68657	-8.27169	-8.12096	-9.40127	-10.6599	-6.8399	-9.68676	-8.57336	-8.2813	-9.1268	-7.21532	-6.234	-6.90247	0.652464	7.30694	11.7319	16.689	17.516
			-4.18611	-2.06357	-1.02083	-3.44311	-2.18569	-3.85778	-3.92807	-5.98315	-3.52171	-4.07802	-2.91925	-2.12715	-3.42314	-1.19203	-1.00978	-1.42581	-3.64475	-3.69862	-2.23012	-3.82883	-3.2302	-4.82306	-5.15741	-2.76097	-2.03311	-6.48596	-3.55946	-3.53003	-2.28789	-2.47155	-3.12646	-3.66847	-4.49564	-2.5066	-1.51971	-1.79502	-2.71157	-1.80905	2.01278	0.0499148	4.70006	-0.943272	8.33832	10.688	15.4031	14.449	15.0103
			-5.87367	-4.34152	-6.24622	-2.88603	-6.25233	-4.59839	-4.97889	-4.80724	-6.03651	-4.85473	-6.10048	-7.55886	-5.55839	-6.46036	-5.02338	-6.28724	-6.30812	-6.23308	-6.50586	-5.82608	-6.80582	-7.75778	-8.97948	-7.47007	-8.6602	-7.64162	-6.17904	-6.67999	-6.61268	-7.21231	-7.28818	-6.46112	-4.4532	-5.95147	-5.28852	-5.31313	-5.27032	-6.50767	-5.75783	-5.62973	-1.41422	-3.1413	-1.04304	-2.86271	-2.18152	-2.2847	-0.63441
			9.98447	3.78781	7.06147	2.15804	-0.243745	-1.54699	4.0306	-4.00828	-0.123861	-0.46326	-2.43695	-0.271733	4.40165	0.0420432	3.95082	0.852867	4.80558	2.07873	3.10156	2.59011	2.80069	1.03708	-0.386381	2.45528	2.48507	-0.0246982	-0.967287	-1.33803	1.48672	0.409346	0.362448	0.490546	1.04899	-1.47243	-0.953264	-4.8957	-3.6511	-2.22667	-1.93467	-1.36272	1.91421	0.517356	4.21413	-6.84892	-0.872861	-2.04689	3.73468
			-8.24615	-9.12899	-10.0479	-7.6091	-7.46222	-7.97761	-9.6102	-8.99887	-9.7144	-8.83566	-9.53139	-9.03692	-10.0259	-7.23516	-9.35442	-6.25836	-10.551	-11.1911	-10.7437	-9.20167	-11.3274	-9.29115	-7.48309	-8.26127	-7.2164	-8.44298	-8.41028	-7.35992	-10.906	-9.01544	-6.90527	-5.63359	-9.3567	-8.40316	-6.04507	-7.41778	-8.05867	-7.42577	-6.38492	-8.87313	-12.6098	-10.4079	-7.57958	-1.35736	2.73554	7.98083	9.14176
	mean	1	-3.77188	-3.4247	-2.72073	-2.76981	-4.02914	-2.71783	-3.68447	-3.48157	-2.8909	-3.28074	-3.62839	-3.62221	-4.03201	-2.59986	-3.167	-0.846065	-1.50413	-2.79563	-4.11712	-2.10418	-2.00956	-2.71878	-2.6353	-1.92081	-1.53819	-2.13186	-2.40551	-2.02061	-2.41716	-2.18635	-2.98128	-2.86854	-2.66143	-2.01681	-3.92371	-3.53985	-1.75039	-1.50281	-1.63338	-1.15317	-1.41357	0.404473	1.96076	4.23143	4.9279	6.58521	7.40868
	mean	2	3.58907	3.735	2.74387	3.58333	1.75743	0.923203	0.559474	2.0536	1.34502	0.314942	3.18811	1.82401	0.976408	0.101303	-0.310219	0.097498	0.928979	1.42	0.384776	0.400656	0.27464	0.720631	-0.830743	-0.667154	-0.0039168	0.491058	0.859522	3.24058	1.4119	1.04163	3.87231	0.285133	0.122515	-0.421569	0.930693	2.13571	-0.562092	-1.55946	-1.151	-0.740851	-1.58715	0.617385	2.66524	2.81767	4.12373	5.47154	5.4882
	mean	3	-3.61744	-4.21903	-4.62429	-5.67067	-4.68924	-4.00283	-4.65775	-5.06533	-6.22233	-5.86795	-7.02514	-4.90486	-5.9906	-6.75419	-6.12498	-5.37807	-6.41449	-5.7492	-5.74622	-5.99642	-6.72273	-6.55267	-7.08315	-6.58253	-6.02986	-6.89604	-7.57905	-8.05326	-6.60345	-7.36792	-7.82004	-8.29234	-8.38455	-8.46368	-7.428	-8.87577	-7.63094	-8.61115	-8.4817	-8.36291	-8.84123	-5.63321	-2.05448	-1.58096	0.268416	2.7678	2.4188
	mean	4	-0.930899	-2.22506	-2.20104	-2.65329	-4.01286	-1.6222	-1.98339	-2.85042	-1.50644	-2.80431	-3.51773	-2.3438	-2.79545	-3.19491	-3.06889	-5.03636	-4.91353	-3.09324	-5.051	-4.14604	-4.04119	-5.17684	-4.9801	-4.02899	-2.8253	-4.03188	-3.97729	-2.97229	-3.98481	-3.36403	-6.31335	-2.96482	-4.1743	-2.59219	-4.04443	-4.65277	-3.60637	-4.56895	-3.82487	-4.08896	-3.99581	-1.27798	1.50066	1.78491	5.49542	4.67114	7.13908
	mean	5	-4.1299	-2.51464	-3.38689	-4.15111	-3.32763	-3.38371	-2.9289	-3.6659	-3.8422	-2.80914	-4.13748	-4.12089	-3.86329	-4.61205	-4.63782	-4.31709	-3.80896	-4.49456	-3.98029	-4.94353	-5.05208	-5.15951	-4.8182	-5.40752	-5.4345	-5.55767	-5.25892	-5.98468	-5.59171	-6.36972	-5.35046	-5.80629	-5.93314	-6.28947	-6.33797	-6.6469	-7.09753	-6.61906	-7.78589	-6.61119	-6.48501	-6.59702	-0.776064	1.49354	2.66001	3.02552	3.7306
	mean	6	-1.18921	-1.13716	-1.23864	-0.904038	-1.00914	-1.58613	-4.0929	-3.22176	-1.84905	-2.96393	-2.13809	-0.887834	-2.40032	-1.77007	-3.61224	-2.09568	-1.69491	-1.9559	-2.95412	-2.82766	-1.8232	-2.94998	-3.57659	-3.3348	-3.51182	-3.02228	-3.33324	-4.5923	-3.21598	-1.98214	-2.77448	-2.51305	-4.19569	-3.13018	-3.3807	-4.601	-4.22467	-3.10298	-4.57712	-2.0373	-4.4962	2.6844	2.58378	5.4756	6.37373	8.98371	9.62395
	mean	7	-2.35726	-1.64982	-3.14709	-3.17768	-3.31852	-1.13306	-1.616	-1.94479	-1.96739	-2.1579	-3.05314	-1.86603	-1.60568	-0.587211	-2.16027	-1.81969	-1.49265	-0.391792	-2.00137	-0.657501	-2.0944	-2.10083	-0.661501	-1.02252	-1.53419	-2.029	-2.42448	-1.92859	-2.99167	-3.07125	-3.27891	-1.78944	-2.5801	-1.93837	-1.9699	-0.21721	-1.74835	-3.75343	-2.64975	0.601386	-3.14723	-1.39836	3.28039	5.05128	5.96196	8.20794	8.70739
	mean	8	-3.8895	-2.36474	-2.81987	-4.65944	-4.88229	-3.71091	-4.36067	-5.49742	-3.60998	-3.8085	-4.25939	-2.92491	-4.29443	-4.15859	-4.44606	-2.08023	-2.90681	-2.56319	-4.25371	-2.55817	-3.12992	-2.41365	-4.16908	-3.5096	-3.75554	-4.30204	-3.58296	-2.6541	-2.20925	-2.3036	-3.60921	-5.02727	-5.85745	-4.6892	-4.86475	-5.5498	-5.73333	-5.15566	-3.43189	-2.49465	-4.2887	-2.54951	0.845513	0.935783	2.11445	3.07972	5.43992
	mean	9	0.979666	-0.133983	0.108961	0.401859	0.797338	0.35447	0.477653	0.179614	1.16198	0.27232	0.315912	0.0980434	-0.50713	0.195251	-0.2284	-0.29101	-0.191361	-0.163103	-0.819454	0.315862	1.22097	1.33186	0.0664511	0.710417	-0.465507	-1.10964	-0.81367	-1.32208	-0.273807	-1.67293	-1.20658	-1.30661	-1.86829	-1.46888	-1.63712	-2.68898	-2.48164	-1.88757	-0.965699	-1.79648	-1.12896	1.52171	2.49037	6.31833	7.46903	9.99674	10.1515
	mean	10	-2.56021	-3.33758	-2.95551	-3.23008	-4.55241	-4.04269	-3.80433	-6.05773	-4.86979	-4.51023	-5.24133	-4.67816	-4.39049	-4.22095	-3.76232	-4.35583	-4.85678	-5.42285	-4.88656	-4.6867	-5.59085	-5.87792	-5.97206	-5.00748	-5.10623	-6.35339	-5.40868	-5.27737	-5.36062	-5.3953	-5.04583	-4.67872	-5.33156	-5.79871	-4.12929	-5.82168	-5.653	-5.25009	-4.23829	-4.60619	-2.72876	-4.17552	0.916458	1.38519	5.36325	6.95745	8.95367
[truncated: 132 more columns]

## Sheet: Fig 3i
		120 sign
		DA	0.558339	0.41488	1.22643	-0.410241	0.0322616	0.367866	0.0198725	-0.910776	-1.46038	-1.69541	-0.441828	-1.36708	-1.14601	0.641814	-0.117817	-1.65626	0.889188	1.11311	1.56267	2.37936	4.21497	3.01873	7.01994	14.4608	21.303	25.5759	29.4553	33.1176	35.423	34.9033	36.5299	36.1548	36.4369	35.5121	35.3719	34.9919	35.9615	35.1416	36.4544	34.9388	36.2018	35.2229	36.8635	30.0998	31.8363	29.6939	30.2741
		DA	0.755006	1.44169	0.124766	1.18358	0.918127	2.87594	2.21751	1.69705	0.214013	0.42908	0.949129	0.469111	-0.0156942	-0.046344	-0.282104	-0.896248	-1.62491	-1.97245	-3.05903	-5.37823	-2.35935	-1.21454	-1.7219	1.03506	2.51286	12.2548	14.2939	13.582	17.3374	20.1223	19.8977	22.7408	23.4492	25.8021	27.1728	27.3579	28.7457	31.322	32.1732	31.7787	32.4543	31.7537	30.9515	32.7632	34.5972	36.6967	36.1201
		DA	-0.942916	0.752311	-0.00758587	-0.29716	-0.635156	-0.902764	-2.53318	-2.52658	-1.12718	-1.06173	-0.660713	0.116313	0.624023	1.28524	0.987766	1.2092	2.25368	0.305383	1.2411	1.91995	1.57104	4.0128	3.94617	8.20487	11.5633	16.6443	21.7394	25.8232	25.9489	27.7765	29.2768	30.7352	30.9806	32.6723	34.3146	36.13	39.4027	41.2729	43.4041	46.4692	48.8965	49.2942	50.3442	50.878	52.4027	52.2844	54.2637
		DA	1.68375	0.680296	1.80557	2.06446	2.60242	0.978478	-0.385079	-0.699362	-1.65533	-0.300376	-0.235774	0.245584	-0.0115771	-1.1431	-0.932718	-2.0327	-1.64813	-0.314907	-0.359656	-0.341848	-0.713007	-1.205	-0.287771	6.35777	9.55603	17.1217	20.191	21.686	23.751	25.27	26.3551	27.6915	28.9329	31.7566	32.4518	35.1915	36.3756	37.7619	39.6807	42.2181	45.2846	46.7011	46.7799	49.0147	48.5966	48.5974	47.3989
		DA	-0.757823	-1.33128	-2.71793	-0.873566	-2.32291	-1.78761	-1.00392	-0.650964	0.131151	-1.14218	0.0262133	-1.09954	0.191866	2.21203	1.67013	2.7028	2.15059	0.70372	2.57485	1.32438	2.56475	2.5613	1.08654	5.43979	9.42504	10.409	14.2616	16.5907	18.7886	19.4532	21.1524	21.2752	23.5785	24.618	27.9535	32.567	35.4699	38.3433	39.6704	43.6458	48.0377	50.3436	51.2649	54.0654	55.1297	54.6403	55.6879
		DA	-0.562618	-0.701111	-1.25549	-0.195269	1.49102	-0.054452	1.88804	0.764733	1.17811	-0.245341	0.171464	-0.428235	-1.22533	-0.107129	-0.822892	0.0416274	0.714105	0.202138	-0.195135	-0.658237	0.957333	0.476812	2.71615	5.87905	7.08151	8.5543	10.1118	12.6515	15.5589	17.0604	18.1053	20.574	21.5693	25.0004	29.2251	30.8381	36.2266	39.8847	44.7379	47.49	50.0615	52.043	54.5763	56.0769	58.6804	59.5971	59.0662
		DA	1.60394	-0.863765	0.360548	2.03902	1.97441	1.46407	0.615243	-0.450205	-0.0589717	0.170047	-0.733183	-0.47182	-0.631836	-1.35296	0.388143	-0.729895	-2.31261	-0.111226	-0.641182	-0.257774	0.0318046	-0.788315	-0.369859	-0.973229	1.78771	2.91792	8.5985	10.4038	12.6671	14.5684	15.8882	17.3413	18.656	21.4577	23.0592	27.0802	30.6663	31.5769	33.3969	37.7328	41.9124	44.0381	45.0074	46.7194	44.5448	44.3464	44.4758
		DA	-1.17111	-0.568138	-0.883468	-0.0632365	-0.543969	0.632334	0.116332	0.249201	0.47627	-0.417733	-0.530535	1.19451	-0.123074	1.21762	1.14593	-0.935075	1.50722	-0.511929	-0.312086	-0.47906	-3.17958	-1.33952	3.55055	-11.7911	3.25061	2.94876	0.919096	6.56767	6.34717	9.11033	9.79313	8.85936	8.37215	10.949	11.0245	10.0833	11.4115	9.65763	11.4835	15.6377	10.1296	12.391	15.323	12.8521	16.7173	12.994	16.9723
		DA	1.51324	0.587606	1.93343	1.87736	0.623821	0.50706	2.0073	1.29077	0.0267663	0.560438	-0.477541	1.02491	-0.619136	-0.418708	1.37734	-1.89859	-1.37895	-3.36412	-3.66044	-1.51256	-1.78327	-4.91518	-0.0128649	-3.36889	-3.60298	-2.65789	2.56526	-1.45453	1.33505	2.42647	3.75917	4.536	5.19138	7.82061	9.34587	9.49306	9.83254	12.1746	12.0631	15.3277	13.9149	16.2467	15.5518	17.6126	16.0238	17.9266	17.2165
		DA	-0.869922	-1.26091	0.108392	0.155789	0.445097	1.15442	-1.06509	-0.432205	-0.262776	1.16272	0.567916	0.307669	0.979423	2.06144	-0.189634	-1.01188	-0.939403	0.0445531	0.2575	-1.21309	-1.89384	2.11803	-3.95051	-0.426351	0.608557	-1.23797	1.46314	0.839952	2.23519	5.51442	4.63146	7.28195	7.69996	9.79474	11.6722	13.0733	16.7458	19.3632	15.8964	15.3993	18.242	21.5185	19.3681	19.2036	20.3954	21.1464	20.2273
		DA	4.21015	2.48064	3.29441	2.43747	3.37017	3.1853	1.23827	1.03751	0.3239	-0.0102324	0.57517	0.88241	-0.530273	0.0824427	-2.5723	-1.35384	-3.1498	-4.22404	-5.41459	-5.86276	-2.96493	-0.939898	0.266436	-0.660391	0.0077596	-1.64386	0.467948	0.785182	2.45433	4.86435	7.11977	7.62889	8.6166	10.6055	13.274	12.9213	14.9254	17.2216	19.5105	20.9658	21.0199	21.2462	22.917	21.9129	20.6709	18.6262	17.0255
		DA	0.760963	2.5665	2.63222	1.50085	1.70154	1.2586	2.57353	1.13643	-0.277908	-0.498809	0.276035	-1.0616	-1.17334	-1.29708	-2.40133	-1.81233	-1.55431	-1.44942	-0.937584	-1.94295	-0.905433	-1.75714	0.682352	-1.6944	-1.75266	-0.987111	0.18922	0.320343	-0.464748	-1.31782	-0.601637	-0.510808	0.337704	-0.385773	-0.504096	-0.72104	-0.198679	-1.28832	-2.39196	-2.83644	-1.40308	-2.8711	-2.36669	-2.76052	-2.71063	-3.60086	-1.43163
		DA	0.896338	1.07326	0.266549	0.44674	-1.01269	0.382172	1.57397	0.899656	1.1845	1.61762	-0.0662954	-1.49289	-0.605118	0.0506865	0.31042	0.0990284	-2.04044	-2.85787	-0.827302	0.101658	1.83616	1.38339	1.16514	-6.23303	-5.92355	-7.70946	-7.34579	-4.97979	-4.08063	-5.08064	-2.66168	-0.584512	-0.585829	0.969854	-0.750337	0.106673	0.650504	3.09618	3.26533	4.4575	4.58312	3.69436	3.48361	4.0342	2.12994	0.977386	-0.0816029
		DA	0.462902	-0.261798	0.982232	-0.165641	0.710791	0.631279	-0.290808	1.45845	-0.626967	-0.949976	-0.586984	-0.150069	-0.890571	0.0457479	-1.84471	-1.21704	-1.10735	1.70304	0.828388	1.2691	2.7923	4.87698	3.91001	2.60606	1.85077	0.716347	2.36475	4.34637	3.30741	4.98977	5.25801	5.12199	6.46749	9.12748	9.72449	10.0679	11.8886	11.6168	11.2289	10.9225	10.4046	12.3558	13.5251	10.485	10.0317	8.30277	8.61613
		DA	-0.149023	-0.762675	1.69113	0.676416	3.24452	1.06468	-6.39122	1.47462	0.58214	0.514332	1.51569	3.74266	1.17387	0.161122	14.3376	-0.286311	-24.2821	1.21963	0.143821	0.329046	2.29197	3.26916	4.88901	3.66805	0.398887	-1.05941	2.41067	2.02245	4.11919	4.56061	6.30793	6.64857	5.91112	6.52114	6.90936	7.70716	9.36862	9.80229	9.7419	12.8525	10.9624	12.2133	12.3682	12.7765	11.7471	10.7551	9.62961
		DA	-4.58725	-2.96981	-1.49578	-4.06799	-1.24121	-1.44978	-0.183205	-0.360194	-0.529555	0.932798	1.96787	1.99534	1.49929	1.34297	0.660824	1.45906	2.40866	2.09057	1.2004	1.32701	0.474314	0.416311	1.60566	-0.55177	-2.40696	0.60815	-1.06799	-1.09194	1.39073	1.35683	2.56603	4.52587	5.34878	4.06175	5.00763	7.9012	5.59839	9.63762	10.2957	14.6852	20.1264	18.2542	17.3853	17.7524	19.4637	22.5604	21.9436
		DA	2.84566	-0.0557047	0.854053	1.58734	1.27875	0.418004	1.07739	0.0543823	-0.229716	0.391687	0.316865	0.0841259	-0.660164	0.917968	0.423511	-2.76333	-1.25732	-1.99531	-1.36382	-1.92437	-1.70163	0.437324	1.29741	0.63401	-0.10905	-3.19964	-3.43337	-2.16688	0.516573	3.5938	3.44673	3.74258	5.56815	9.86886	6.44325	10.2309	13.0911	12.9838	13.199	13.8204	20.2753	25.4212	24.6762	27.7977	26.0174	28.8736	27.0077
		DA	0.174826	-0.136434	-0.650822	1.04643	1.58033	-0.84413	0.452543	0.131569	0.0735959	0.45745	1.37616	0.0192247	1.31434	-0.833241	-0.719473	-1.41086	0.724874	-1.01365	-0.768976	-0.973754	-1.77291	-6.22247	-1.39123	-1.36565	-0.0257126	-0.736373	-0.313914	-0.114473	2.0898	3.4347	3.60696	6.9522	5.96454	8.40513	9.18929	11.0308	12.8791	13.8566	16.5088	17.5593	21.3475	23.5224	24.9054	24.9774	26.8165	27.6674	27.407
		DA	-1.13037	-1.24472	-0.202205	-0.324199	-0.79136	-1.81867	-0.983903	0.474153	-0.709017	-0.524595	1.46886	0.783813	-0.573801	0.73591	0.90601	0.818281	0.362484	1.90688	0.752282	0.0941552	0.476602	1.20617	2.10447	1.44813	2.41564	3.96374	4.83273	5.91023	3.58838	5.05189	5.73355	9.09993	9.09859	10.9882	8.99954	11.7434	12.7145	14.4781	16.723	17.6051	18.4282	21.6984	20.2747	24.7925	25.5222	25.9389	26.53
		DA	-4.32878	-3.44633	-2.20552	-2.79507	-2.20589	-0.397746	-0.387646	-1.48678	-0.686408	0.830857	0.549788	1.78339	1.54809	-1.41958	1.40081	1.77286	1.23083	3.51634	3.84438	2.88238	3.39713	1.33037	1.18368	3.92362	0.38098	0.64226	5.2453	-0.364353	-1.68859	0.148291	-0.168356	-0.326726	0.473063	-0.239356	1.68739	5.718	6.9058	9.32318	11.4143	13.9468	16.9319	20.2068	21.7197	22.5733	23.4494	27.6859	28.0744
		120 goal
		DA	0.0362988	-2.06829	-0.524143	-0.25882	-0.366511	-1.8729	-1.78017	-0.784126	-1.29682	-1.89608	-0.904616	-0.417511	-0.659143	2.14564	1.28677	2.89081	-0.949419	2.26632	2.77234	2.38037	1.09521	3.14854	3.60525	3.08895	4.082	2.87506	-0.506178	3.85206	4.76597	2.17689	4.30829	4.63361	6.24253	7.99501	11.028	13.0724	10.1479	11.8943	16.332	12.2403	17.688	14.5598	15.7987	16.7694	13.735	13.7728	12.6306
		DA	-1.78681	-1.00579	-3.82146	-0.854529	-2.81386	-2.2054	-0.879717	1.57007	0.986082	-0.644334	2.01025	1.30452	0.0301321	1.14747	-0.795371	1.14137	0.448804	1.46189	1.81442	2.89226	0.89367	6.03649	4.4829	10.6913	15.6642	17.2293	18.5803	23.1322	29.0371	29.6429	31.1012	29.1871	32.5835	33.8264	38.2219	42.4306	43.92	46.322	47.5387	45.6428	47.9047	48.0756	48.0782	47.7404	50.4886	50.1301	50.7305
		DA	4.43631	2.99712	4.6483	2.65186	2.08916	2.12549	4.99377	0.82403	1.07996	-0.751914	-1.69793	-2.61118	-1.59927	-3.30108	0.193232	-2.75214	-4.3166	-3.25689	-4.33705	-1.41517	-1.21111	0.868714	8.39865	15.9538	16.9729	19.2615	21.6019	22.975	23.8109	24.6211	29.5912	32.3934	28.521	32.3852	34.0528	33.5214	34.2416	33.1203	35.7939	41.9158	46.7546	45.0187	46.6915	49.3652	54.1426	54.8392	56.0039
		DA	0.987197	-1.55029	-1.12786	0.362163	-1.30016	1.13142	0.111924	0.630014	0.0786685	-0.518266	-0.0200514	0.551568	0.0331574	0.293473	-0.980435	0.250828	-0.67043	0.954717	-1.03205	1.81441	-0.792078	0.370484	2.70005	1.27086	3.3449	5.66998	4.18681	5.94186	6.98288	5.69191	9.0361	7.57352	9.7482	11.8414	15.0859	17.2458	19.636	20.5377	22.3983	25.2898	25.6071	25.0632	25.7175	25.8907	27.5886	27.9282	28.676
		DA	-0.568872	-3.68048	-0.893116	-0.953639	-2.03451	-2.42587	-1.8771	-2.34295	-2.96921	1.07419	1.10558	0.512721	2.12998	1.3949	0.494013	0.830396	2.47045	1.89629	1.62842	4.20881	3.87127	5.25931	3.45277	3.14654	2.55858	4.47497	3.62728	3.28601	4.60736	3.51665	4.38464	3.67676	4.77655	7.42518	9.01136	9.63321	10.2495	14.4476	14.1046	13.69	14.4248	16.6563	14.898	16.461	16.9531	15.0549	15.4297
		DA	-4.76846	-1.99892	-0.703955	-3.03588	-2.99236	1.98908	-1.05606	0.338743	-0.476601	3.59053	0.435982	0.428016	0.231012	-0.729092	2.20404	1.08726	-1.00101	2.89478	2.36532	1.19757	4.77637	5.79158	2.45342	7.94983	7.90614	7.59314	5.41855	9.59594	10.9564	12.5087	12.9708	17.1507	14.6976	17.9074	19.8795	19.6515	26.7706	26.0149	23.7568	26.6532	29.0108	30.5302	28.6026	32.6022	35.6821	30.0613	31.1617
		DA	1.28538	0.255354	0.264267	-0.178512	-0.518534	-0.352351	0.384717	-0.0523608	-0.0631363	0.67698	-0.374674	-0.724992	0.393033	-1.34797	0.772457	0.0378801	0.798109	0.147278	-0.443498	-0.959426	2.00583	3.87643	2.76411	1.69204	2.77883	3.40514	2.50194	3.53988	0.701242	1.75858	3.28251	3.90806	5.31721	8.06936	10.462	12.4695	15.9544	18.9943	22.0771	24.6112	27.4028	29.8586	31.7202	32.3446	32.9995	33.2469	31.9759
		DA	-0.38363	0.385242	-0.469368	-0.416044	-0.774889	-1.06402	-0.376936	-0.713539	0.259934	-0.0785059	0.565086	-0.3095	0.822075	0.53797	1.19828	0.709359	0.165098	-0.731336	-0.412326	1.08705	3.19325	1.68564	2.67025	1.62251	1.3884	1.59312	1.71633	0.424821	2.09126	1.31661	2.84295	3.74503	5.2924	7.15003	10.2481	12.6478	15.0298	17.9154	21.0739	23.2997	26.3258	27.92	29.6198	30.0957	31.52	32.3062	32.5221
		DA	0.039896	0.00183564	1.3568	2.2555	0.679203	-0.502824	-0.48802	0.156982	-0.290723	-0.0488778	0.537506	-0.0395375	-0.0011582	-1.4035	0.340586	-0.314378	-0.153512	-1.54801	-0.910961	0.333203	2.31329	1.54573	2.50246	1.5911	1.4134	0.615356	1.31807	0.926721	1.67686	0.959994	2.38185	2.69699	5.37652	5.63673	8.23461	10.342	11.7436	13.9246	16.0389	19.5048	21.2822	22.4029	22.6948	24.5332	26.0522	25.5862	25.1527
		DA	1.31346	0.928834	0.630662	-1.30396	-1.23557	0.769141	0.0682334	0.888203	-0.0238123	0.46952	0.558333	0.484032	-0.468837	-0.194652	-0.598868	-0.51016	-0.705505	-1.11486	-1.14949	1.19529	-0.035117	0.745403	0.676539	0.14832	0.81981	1.46676	1.80453	2.6914	2.88816	5.28279	6.39196	8.71934	11.1187	13.1705	15.6514	19.7072	23.0338	26.4072	29.703	33.4687	35.7704	38.7147	39.8068	41.6361	40.6843	39.9404	40.8286
		DA	1.23568	0.548627	-0.921444	-0.338704	0.0719835	1.16024	0.310371	0.803276	1.33006	0.785695	0.0437944	1.10109	-0.082759	-1.43066	-0.418451	-1.35127	-1.71631	-1.16545	-0.448113	0.482334	1.76099	3.74781	1.41354	1.17382	1.77259	1.62969	2.25211	3.06777	3.69935	5.62631	7.2385	8.35256	12.1386	13.7852	16.8647	20.8707	23.3915	26.1949	28.8	32.8005	35.6017	37.1833	37.6591	39.7746	39.396	39.3062	39.0959
		DA	2.95834	1.37847	2.67165	2.5981	-0.0855307	-0.527103	-0.940451	1.03777	-1.12522	-0.61059	-1.90408	0.306115	-1.79044	-0.0579931	-0.263972	-0.16002	-0.417717	-0.664303	-2.11716	-0.285846	-12.7111	-29.3259	-11.3103	-2.53519	-5.16745	-9.32137	-3.2627	-1.85203	-0.490629	-1.31914	0.716723	-1.54589	-0.673413	-0.357231	0.565989	2.75001	2.8733	7.0759	6.18803	5.88158	6.99947	9.99259	12.1293	13.4742	14.9144	15.373	15.9376
		DA	-1.88335	-1.72976	-1.12687	1.31253	-1.06694	0.318225	1.88448	1.39707	0.455264	-1.23343	0.0981431	-0.499459	1.5485	0.651758	-0.255188	-0.70106	-1.46092	1.02004	0.153654	1.11732	1.10348	8.55167	8.47493	13.6673	-9.38427	-2.37328	2.90421	-1.63695	-1.34327	1.29826	1.27612	3.36289	0.992514	3.54549	4.90903	5.62886	7.75551	10.4303	10.9096	13.6887	14.8401	17.5971	19.2883	20.6526	23.6554	24.4537	26.1077
	120 sign	DA	0.0482652	-0.180274	0.293046	0.291154	0.561004	0.383253	0.0277968	0.157574	-0.171689	0.0110322	0.301415	0.328892	-0.0437514	0.206842	0.686276	-0.495075	-1.45268	-0.250477	-0.256721	-0.445879	0.166722	0.336267	1.38447	1.32962	2.91609	4.15627	6.34743	7.22375	8.53124	9.89035	10.7998	11.9744	12.6034	14.2653	15.0786	16.6756	18.4331	19.8613	20.9228	22.7308	24.3906	25.7647	26.246	26.6813	27.1031	27.2855	27.3212
	120 goal	DA	0.223187	-0.426003	-0.00127188	0.141543	-0.796039	-0.112067	0.027311	0.288706	-0.158119	0.0626861	0.0348712	0.006606	0.0450975	-0.176442	0.244392	0.0891445	-0.577613	0.16619	-0.162807	1.08063	0.481841	0.946301	2.48343	4.57394	3.39616	4.16303	4.78024	5.8419	6.87566	7.16012	8.88637	9.52723	10.4717	12.4908	14.9396	16.9208	18.8267	21.0215	22.6704	24.5144	26.8933	27.9671	28.6696	30.1031	31.3701	30.923	31.2502
[truncated: 114 more columns]

## Sheet: Fig 3j
		60 sign
		time	-10	-9.9	-9.8	-9.7	-9.6	-9.5	-9.4	-9.3	-9.2	-9.1	-9	-8.9	-8.8	-8.7	-8.6	-8.5	-8.4	-8.3	-8.2	-8.1	-8	-7.9	-7.8	-7.7	-7.6	-7.5	-7.4	-7.3	-7.2	-7.1	-7	-6.9	-6.8	-6.7	-6.6	-6.5	-6.4	-6.3	-6.2	-6.1	-6	-5.9	-5.8	-5.7	-5.6	-5.5	-5.4
		DA	1.39477	0.548491	-0.636534	0.120976	1.88314	1.04074	-0.255055	1.28661	-0.686925	0.615342	-0.247313	-1.13329	-2.22916	-1.35389	-0.0407334	0.290008	1.20819	-0.793051	-0.19357	-0.818737	1.7039	3.29508	2.03115	3.89663	3.59168	2.45617	5.48495	5.63597	6.25518	7.91946	9.76731	9.71195	9.38478	9.23991	10.3547	12.3465	10.4718	9.24743	10.1087	10.2229	8.8566	10.0134	9.17605	8.55685	7.70027	8.42469	6.80991
		DA	1.63044	1.08677	1.43353	1.10428	1.34297	1.39197	-0.187505	0.295045	-0.0462358	0.0684674	-0.464923	-0.820432	0.212699	-1.45546	-1.62225	0.615251	-1.86818	-0.712682	-0.467035	-1.5367	2.72557	3.11354	3.47815	5.54459	4.54629	4.73089	5.93104	6.22196	7.77846	9.31554	9.62738	9.79255	9.37016	8.41265	8.36395	6.93923	8.87425	7.84651	6.90408	6.92989	5.82138	6.44283	6.51146	4.55991	4.40181	5.06292	5.26545
		DA	0.779749	-0.199998	-1.15196	-2.37365	-0.864249	-2.05437	-1.03579	0.426791	-0.074161	-0.00685864	-0.606486	-0.682354	0.144703	2.15263	0.654353	1.31731	1.29269	1.33551	0.0981507	0.847994	0.976098	5.19161	3.46453	5.56278	3.74312	4.42431	4.32113	5.97142	6.49809	9.17579	6.37674	8.7991	7.66555	7.77573	9.42756	7.64015	7.08132	8.2007	7.08948	6.74971	7.82646	5.30581	5.45033	5.58188	7.38988	4.81297	6.35824
		DA	-1.43276	1.23393	-1.67969	-0.1329	-0.18804	1.51642	0.979584	-0.914528	0.195621	0.502671	2.13596	-0.00945468	-0.650698	-1.65663	-0.473073	-0.410254	0.00464663	1.01768	0.656414	-0.694902	1.91059	0.808994	1.9064	6.43413	9.71166	10.4866	13.8545	14.7262	13.8836	13.8471	11.0336	10.6454	12.6872	10.1324	11.6955	10.0644	10.1754	12.1317	13.5644	11.1577	12.1999	11.0385	10.4683	9.42229	8.65432	9.85696	9.41607
		DA	1.50943	1.83823	1.64407	0.291833	1.39163	2.78528	-0.19694	-1.49451	-1.60806	-1.6502	0.354603	-0.444542	-0.219335	1.30371	-0.115797	1.766	-0.22608	-1.87022	-2.55386	-2.50523	-3.03737	-4.40681	0.312935	4.78566	8.29948	12.3786	16.021	16.8459	16.427	18.5232	15.5872	17.3479	14.781	16.4598	12.8512	14.3587	12.2043	13.5554	12.4897	9.48598	10.0133	11.0839	12.3512	7.89723	8.21071	8.46054	9.54753
		DA	2.03118	0.912454	5.46735	1.61673	0.78567	0.348579	-0.381692	1.63205	1.4387	-0.25218	-0.719953	-1.1885	-0.45243	-1.79975	-2.97003	-1.67949	-1.93946	-1.79212	-2.40553	1.34843	1.90606	-1.41779	-6.94797	-2.77722	-0.904966	2.35165	2.52604	5.86476	5.46069	5.47568	7.54589	7.66683	5.85524	5.45087	6.84716	6.78547	5.04169	1.60994	4.31545	5.04846	6.22764	5.06014	6.69208	7.46819	6.58009	5.31517	5.73837
		DA	-1.07435	-3.20005	-1.16382	0.644234	-0.133948	0.910926	-0.315659	-0.282954	0.767399	-2.77865	-0.888118	1.22205	2.49373	-1.22938	-0.275838	2.08225	0.709548	0.0686565	0.701556	1.74241	-0.745804	-4.4825	-2.28061	0.547745	6.76996	10.8629	16.1082	17.2691	17.2314	16.5274	16.9321	16.6374	12.6057	16.7438	15.5129	16.8423	12.9967	13.8812	12.9689	12.4891	9.96724	9.98337	8.00956	10.8707	7.78513	7.57195	12.3713
		60 goal
		time	-10	-9.9	-9.8	-9.7	-9.6	-9.5	-9.4	-9.3	-9.2	-9.1	-9	-8.9	-8.8	-8.7	-8.6	-8.5	-8.4	-8.3	-8.2	-8.1	-8	-7.9	-7.8	-7.7	-7.6	-7.5	-7.4	-7.3	-7.2	-7.1	-7	-6.9	-6.8	-6.7	-6.6	-6.5	-6.4	-6.3	-6.2	-6.1	-6	-5.9	-5.8	-5.7	-5.6	-5.5	-5.4
		DA	1.6287	2.08272	2.30736	0.370392	1.1853	1.9497	1.33894	0.187035	0.535178	-1.38788	-1.6182	-1.44486	-1.25178	-0.642021	-0.876489	0.790291	-1.36433	-0.294887	-2.37127	-1.12391	-1.50529	0.3654	2.34761	3.48094	5.84559	7.59752	8.73728	10.8344	12.4485	13.4649	14.3867	16.0125	17.8021	18.0808	23.1845	25.7263	30.2448	33.0222	36.1566	41.866	41.8804	43.5622	47.7061	49.4168	53.514	52.9706	53.2886
		DA	-2.01299	0.575327	2.13201	0.422447	-0.64507	-3.09647	0.343693	0.618302	2.388	1.70076	-0.112863	-2.44944	2.58556	-0.424064	-2.31824	-0.0654453	-2.18271	1.70928	0.305156	0.526765	0.495534	-1.61946	1.95944	6.18906	9.80509	18.706	14.0294	18.7198	20.6995	18.3711	23.1967	22.8443	25.2649	27.4244	29.6472	29.9474	33.1932	33.2456	35.3137	36.8424	38.3541	33.2463	35.7645	39.0167	36.0654	38.5697	36.7417
		DA	0.213195	0.126754	1.69708	-0.543238	-1.4537	-0.590894	2.22052	0.627017	-0.162881	0.938686	-2.9291	1.83004	1.4919	2.19973	-0.254294	1.352	-2.04284	-1.67234	0.819684	-3.86731	-0.509379	7.11236	1.86768	9.96361	15.2781	17.2982	14.0841	17.1057	15.9421	18.6073	19.3012	19.4025	20.3098	20.0772	21.7904	22.0515	22.3047	22.9203	22.6835	24.5046	24.4768	23.4536	23.9798	25.1129	26.4562	26.0925	27.1196
		DA	3.10374	-1.04036	-0.332033	5.5918	-0.803804	-0.460995	-1.76999	0.832721	-0.467438	-2.60257	-2.51516	-4.21948	0.153607	-3.05146	3.8319	0.455192	4.7389	-0.01731	-0.156962	-1.27028	-1.77517	-0.246385	1.6819	10.0948	14.4713	19.2782	23.1235	21.5653	28.3112	33.3944	31.4041	29.5986	33.8478	36.2873	35.53	35.5889	34.2788	37.8052	33.6743	34.4654	36.8489	34.6032	31.6511	34.1321	29.3073	31.3019	31.6483
		DA	-0.475234	1.58227	1.67478	1.00432	2.04318	-1.39597	-0.197533	0.427127	0.374553	-1.36793	-0.118284	-0.0223849	-0.664506	0.00227456	-0.830951	0.329536	-2.35038	1.0683	0.587036	-1.67021	-1.25059	0.442352	0.661962	6.64808	9.22886	16.8657	19.3831	22.9909	24.5931	26.2254	29.7223	30.7371	31.486	35.5827	34.9641	36.4151	39.041	41.4693	40.6764	44.4225	42.1349	40.2605	42.6746	45.1603	46.3368	47.6308	45.2374
		DA	1.46618	-0.39916	-3.49198	-1.31039	-3.30194	-0.10776	-0.176259	0.429263	1.98089	0.204978	1.0942	-1.22728	-1.92802	0.218412	-0.0788916	-3.05493	-1.97707	2.24471	3.92773	5.48733	5.48036	3.29854	8.29421	14.9099	13.9078	13.4759	17.1662	17.2562	15.4098	15.6258	16.7106	16.4683	18.7064	13.0456	15.7181	10.352	10.4057	11.1201	9.36027	7.83271	8.70716	8.26511	9.39046	7.26286	5.87563	4.73632	2.22163
		DA	-0.522746	-1.88142	-0.210548	-4.87065	-3.96422	-1.04083	-2.44324	-1.7984	0.577447	-1.23407	0.962418	0.360468	1.65599	1.748	-1.13956	4.94505	5.15707	2.39606	1.17339	0.12977	0.127598	1.17446	7.70531	15.3277	17.9158	19.4311	23.2808	22.522	24.3254	21.335	21.5979	18.9503	17.0288	15.0575	14.4126	12.1336	8.58502	8.73988	8.08573	6.25646	4.28445	3.63233	0.533893	-2.20897	-4.15352	-5.95062	-8.7205
		DA	2.4243	-1.25645	1.67265	-0.877458	3.53181	1.55083	0.0451541	-2.37252	-0.47625	3.2615	1.01803	2.15586	-1.42579	-0.986813	-1.54663	-1.47638	-1.53375	0.556646	-1.32821	-2.93652	1.69381	-0.0854587	7.02542	10.9545	10.9006	13.8838	18.5044	17.7956	15.2581	13.4432	13.7579	14.9221	14.2677	14.6899	16.8541	13.1537	12.7186	11.6427	7.28427	9.38286	7.8854	9.24912	7.74763	8.97884	6.51287	8.39482	3.88543
		DA	-0.648829	-1.99968	-3.1116	-3.07556	-1.75621	1.00614	-2.39671	0.606262	1.67461	-0.248829	4.88757	-0.624549	-0.542605	-0.104677	2.35069	0.60182	1.33851	1.50375	-0.129807	0.6697	-0.0293824	6.70245	10.9788	12.4113	14.5951	18.886	16.8349	20.9956	18.1039	18.4231	16.508	14.4062	17.3541	18.3692	18.381	19.5629	17.5586	19.635	18.1282	18.729	20.6474	16.3989	17.9683	18.1194	17.3271	15.1329	13.3027
		DA	1.30005	1.62465	1.98665	1.39104	2.56054	2.86157	-0.628596	-0.169831	-1.77647	-0.179777	-0.795803	-0.975926	-1.19514	0.787089	-1.00296	-1.13045	-1.56905	-0.419653	-1.26519	-1.40275	-1.16911	-0.203175	0.142895	-1.49409	3.61281	6.73977	8.88275	10.5305	10.32	12.6509	13.371	10.9463	12.0351	13.1972	13.4718	12.0536	10.5507	8.19359	10.3925	7.47287	6.76291	5.62817	4.6383	4.433	2.778	2.0166	1.21055
		DA	-0.159637	-2.24332	-3.06141	-3.64028	-2.48338	-2.43342	-4.75815	-4.07344	9.62717	4.37629	3.56633	17.7794	-2.84083	-3.49182	-3.58486	-3.76883	6.27996	-0.551173	-2.25806	-2.28051	-0.270555	0.682214	0.934734	3.76669	1.84284	2.91606	6.80826	7.44537	9.30872	13.2824	11.3151	12.5963	12.8111	13.8692	13.0882	12.3397	9.5827	9.65789	9.31687	9.83729	8.49928	10.0482	12.1453	9.20609	9.57762	7.38285	7.97228
		DA	1.85926	1.51927	0.747	-0.0212024	0.651797	1.95733	0.00474175	-0.803657	-1.1685	-0.0357245	0.00759914	-0.364831	-0.774623	-0.665773	-2.2253	-0.676258	-1.3281	0.499919	0.39276	0.424301	0.138255	3.3143	3.06451	6.93141	4.35043	5.02197	8.56939	9.17717	10.5078	10.8027	11.6796	9.90662	10.5147	11.2341	11.3484	10.4338	9.58439	9.72734	7.83453	7.79042	5.16327	4.30234	5.26816	3.66273	3.51882	4.59584	3.70354
		DA	-1.65919	-1.03975	-1.52721	-0.26651	-1.091	-2.05944	-0.177425	-1.01945	0.468028	0.672902	1.7329	-1.24122	1.25309	-0.44899	0.638294	0.496751	0.947012	1.09629	1.72482	1.50012	2.09933	4.04761	4.74473	3.92845	3.86681	4.86363	5.82616	7.10883	7.1997	8.8142	8.5469	10.9393	11.7708	10.8463	11.8099	8.80465	10.8494	8.64428	9.43359	8.46805	5.44431	4.65664	4.26804	3.50948	3.43592	4.66879	3.6643
		DA	1.05415	0.656124	2.70935	2.48066	1.16982	1.2222	2.89272	2.27779	1.11555	-1.5642	-0.416349	-1.29053	-1.51141	-0.70694	-1.36766	-2.55515	-1.14512	-0.993312	-1.32824	-2.69946	-0.717797	-0.810483	-1.33539	1.68635	1.12216	3.24939	2.86098	4.30666	7.03917	10.7874	11.3862	10.3574	10.3638	10.703	10.2285	11.768	11.2596	11.1073	11.4862	10.4392	10.3836	10.4305	9.60491	9.56909	11.9197	10.2342	9.51806
		DA	-1.44594	-0.265649	-1.77913	-1.86781	-2.40275	-1.12392	-1.32192	-1.34156	-0.830342	-1.51695	-0.381125	0.280068	-0.160993	-0.0698467	0.432074	2.34286	1.5417	2.10951	4.56456	3.23718	4.82071	6.1332	6.76966	5.56361	8.57454	9.2441	8.33447	10.9379	11.5232	12.2679	12.8988	11.4262	10.2128	11.8719	10.1798	8.85432	7.31403	6.6281	5.70381	4.35595	2.79063	3.32823	0.689301	-1.20738	1.15192	0.755481	0.703604
		DA	-0.351495	0.117461	-0.939962	-0.489403	0.417801	0.500534	-1.19987	-0.274285	0.117909	-0.424124	0.52613	0.444038	-2.05964	-0.210426	0.842101	-1.78197	-0.247031	-0.53458	2.7643	2.78251	-0.523625	1.36846	3.71948	8.93241	13.1457	15.7448	15.3418	17.8776	17.4855	18.0903	15.0355	16.2288	16.3201	14.2442	12.5672	11.8623	11.0944	10.9055	10.6479	8.64971	11.0587	8.25559	7.32909	7.51779	8.20818	7.76949	7.75877
		DA	-0.366538	2.21009	1.51948	1.30403	0.924748	-0.57334	3.14146	5.35843	2.55763	1.85313	-0.34318	1.36888	-0.468911	0.56354	-0.312783	-1.15789	-2.18811	-4.91964	-5.77567	-4.69534	-4.36949	-10.7792	-5.54637	-6.86512	-10.8035	-9.81373	-11.9347	-12.076	-12.3778	-14.3774	-12.9185	-13.1789	-12.1457	-10.0161	-12.0642	-13.9227	-15.8295	-13.3156	-16.9169	-16.7434	-12.9659	-16.6794	-13.6868	-12.51	-12.3249	-12.65	-10.7955
		DA	2.73651	2.4471	0.472536	-1.50385	-2.49538	-0.664995	0.304502	-0.376696	-3.73784	0.00303182	-0.907265	-1.78186	-1.38683	1.17026	1.16006	2.77612	1.28071	-1.66812	2.09352	0.0784724	-0.781551	-1.77201	-4.37273	1.25548	7.2572	7.24345	8.39431	8.27432	10.3065	8.63213	6.63855	7.88434	6.44927	6.9097	3.18085	5.31053	3.68018	2.69795	0.83779	2.70492	3.26883	2.54222	2.9841	3.44505	4.17863	5.51807	4.42296
	60 sign	DA	0.691208	0.317117	0.558992	0.181643	0.602452	0.848505	-0.199009	0.135502	-0.00195138	-0.500202	-0.0623181	-0.436646	-0.10007	-0.576967	-0.69191	0.568726	-0.11695	-0.392319	-0.594839	-0.230964	0.777007	0.300302	0.280656	3.42776	5.10817	6.813	9.17811	10.3622	10.5049	11.5406	10.9815	11.5145	10.3356	10.6022	10.7219	10.711	9.54935	9.49614	9.63439	8.86909	8.70179	8.41828	8.37986	7.7653	7.24603	7.07217	7.92955
	60 goal	DA	0.452415	0.156443	0.136945	-0.327869	-0.439581	-0.138874	-0.265443	-0.0481049	0.710958	0.136068	0.203213	0.476464	-0.50394	-0.228529	-0.349084	-0.0876485	0.18641	0.117414	0.207753	-0.395008	0.108536	1.06251	2.81355	6.31585	8.05095	10.5907	11.5682	12.9649	13.6891	14.4356	14.6966	14.4693	15.2444	15.6375	15.794	15.1353	14.8009	15.2137	14.45	14.8487	14.757	13.6213	13.9254	14.0343	13.8714	13.8428	12.938
[truncated: 114 more columns]
