# Supplementary material for: Manipulating the revision of reward value during the intertrial interval increases sign tracking and dopamine release
Source: PLoS Biol. 2018 Sep 26;16(9):e2004015. doi: 10.1371/journal.pbio.2004015 (PMC6175531; doi:10.1371/journal.pbio.2004015)
Supplement: S5 Data — (XLSX) [file pbio.2004015.s009.xlsx]

## Sheet: S3a Fig
	time(s)	-11	-10.8	-10.6	-10.4	-10.2	-10	-9.8	-9.6	-9.4	-9.2	-9	-8.8	-8.6	-8.4	-8.2	-8	-7.8	-7.6	-7.4	-7.2	-7	-6.8	-6.6	-6.4	-6.2	-6	-5.8	-5.6	-5.4	-5.2	-5	-4.8	-4.6	-4.4	-4.2	-4	-3.8	-3.6	-3.4	-3.2	-3	-2.8	-2.6	-2.4	-2.2	-2	-1.8	-1.6
	session 1-3	1.4	1.33333	1.86667	2.6	3.86667	2.8	1.33333	1.66667	2.6	2.6	2.8	4.13333	5.8	5.86667	5.93333	4.26667	3.53333	2.26667	1.26667	1.26667	0.266667	1.33333	2.13333	1	0.6	0	0	0.2	1.33333	1.33333	0.866667	0	0	0	0	0	0	1.86667	3.06667	2.66667	2.6	0.933333	0	0	0	0	0	0
	session 1-3	13.1333	11.7333	11.4	9.2	7.53333	7.13333	8.06667	7.4	7.2	8.06667	7.46667	6.66667	5.93333	5.86667	7.06667	5.53333	6.53333	6.66667	9.06667	9.4	8.93333	11.5333	13.6667	14.8	14.3333	14.9333	17.1333	15.3333	16	18.5333	20	17.2667	18.3333	17	16.2667	16.3333	14.9333	16.1333	18.9333	20.6667	23.0667	22.4667	23.8667	24.2	22.4	23.6	21.3333	20
	session 1-3	0	0	0.666667	1.33333	1.33333	1.33333	1.33333	1.33333	0	0	0	0	1	0.333333	0.266667	1.33333	1.33333	3.86667	5.06667	4.8	4.13333	3.46667	2.66667	3.4	3.66667	3.93333	4.06667	3.53333	2.2	1.33333	0	0	1.13333	2.53333	3.33333	4.06667	3.86667	2.66667	2.6	3.4	1.86667	0.333333	0	0	1.46667	3.26667	2.86667	2.73333
	session 1-3	1.33333	1.33333	1.33333	1.33333	1.46667	2.4	2.33333	1.33333	1.33333	1.33333	1.86667	2.66667	1.66667	1.33333	2.4	2.73333	2.06667	2.06667	3.2	4.06667	4	4	4	3.13333	3.73333	3.2	1.93333	1.33333	1.33333	2.2	3.6	2.46667	1.66667	1.26667	1.33333	1.4	1.33333	0.666667	1.33333	1.26667	1.4	1.33333	0.4	0	0	0	0	0
	session 1-3	1.33333	0.933333	0.8	1.33333	1.33333	1.33333	1.33333	0.333333	0	0	0	0	0	0	0.0666667	0.533333	0	0	0.466667	1.33333	1.33333	0.866667	0	0	0	0	0	0.0666667	1.26667	0.0666667	0.8	1.26667	0	0	1.26667	4.73333	4.2	3.2	2.8	2.73333	2.53333	2.53333	3.66667	3.33333	2.06667	2.93333	2.2	2
	session 1-3	7.2	5.26667	4.26667	7.8	6.46667	7.33333	9.26667	6.66667	5.4	4	2.6	3.86667	4.13333	9.2	9.8	10.8	14.8667	26	27.0667	27.8	22.6	15.5333	15.6667	14.0667	13.4667	11	9.73333	8.73333	9.53333	13.4667	13.1333	11.8667	10.8667	8.2	10.4	8.33333	8.06667	7.6	6.86667	7.86667	6.6	4.66667	3.46667	2.86667	4.8	4.4	2.73333	5
	session 1-3	3.93333	2.66667	3.6	5.2	5.4	4.46667	4.06667	3.73333	1.86667	1.33333	1.33333	1.33333	1.33333	2.06667	2.66667	2.46667	3.73333	4.06667	4.66667	5.8	7.06667	7.33333	6.33333	5.06667	4.93333	2.93333	3.06667	2.6	2.93333	4.06667	4.86667	4.53333	4.86667	4.13333	5.8	5.13333	4	3.73333	2.66667	2.73333	3.93333	2.66667	2.66667	2.6	4.06667	4.33333	2.66667	1.6
	session 1-3	5.13333	3.93333	1.8	2	3.86667	4.33333	4	2.46667	1.26667	1.66667	1.4	2.6	4.46667	3.46667	2.8	4.06667	4.26667	4.73333	4.86667	4.66667	5.53333	6.4	7.86667	5.8	4.8	6.13333	6.8	5.73333	5.2	5.86667	7.8	7.06667	4.6	5.66667	6.46667	6.26667	2.93333	4.33333	5.26667	5.2	3.46667	1.4	2.66667	1.33333	5.8	5.2	4.26667	4.06667
	session 1-3	4	4	4	4	4	2.8	3.6	3.8	0	2.4	4	5.6	3.2	4	4	4	3.4	4	4	4	4	4	4	4	4	4	4	4	4	4	4	4	4	4	4	4	3.6	0	4.8	4.2	4	1.4	0	0	0	0	0	0
	session 1-3	4.13333	5	5.33333	5.06667	3.93333	3.86667	5.53333	6.6	6.8	8.93333	4.66667	4	3.06667	2.6	3.53333	3.26667	2.66667	1.73333	0.133333	2.86667	6.2	11.7333	9.33333	8.86667	7.93333	5.26667	5.46667	2.73333	1.6	2.93333	4.06667	4.53333	1.2	1.73333	2.66667	2.46667	1.33333	1.33333	2	2.6	1.2	1.33333	2.06667	1.33333	1.33333	1.73333	1.33333	0.466667
	session 1-3	2.53333	2.4	2.13333	1.06667	1.33333	0.666667	0.733333	0.866667	0.0666667	0.666667	1	1.13333	1.46667	1.8	2	0.666667	0	0	0	0	0	0	0	0	0	0	0	0	0	0	0	0.666667	1.33333	1.13333	1.13333	1	1.2	1.33333	1.33333	1.26667	1.73333	1.8	1.26667	0.0666667	0	0.466667	0.8	1.33333
	session4-10	3.18333	2.6	2.16667	1.95	1.86667	2.23333	2.75	2.95	2.86667	1.75	1.96667	2.51667	3.3	2.71667	2.3	1.88333	1.63333	1.15	0.85	0.4	0.333333	0.05	0	0	0	0	0	0	0	0	0	0	0	0	0	0	0	0	0	0	0	0	0	0	0	0	0	0
	session4-10	4.425	4.525	4.35	3.975	4.45	4.375	4.025	3.8	4.275	4.825	5.275	4.85	4.525	4.8	5.125	5.025	4.225	5.175	6.625	8.75	9.625	9.7	10.225	9.525	9.325	9.725	11.55	10.55	11.075	11.1	10.475	10.6	11.5	11.3	9.85	10.375	11.475	11.4	11.725	10.25	11.125	12.525	11.9	9.75	9.375	10.425	12.55	13.45
	session4-10	0	0.514286	0.742857	0.485714	0	0	0	0	0.114286	0.571429	0.4	0	0	0	0	0	0.371429	0.571429	0.571429	0.228571	0	0	0.942857	1.91429	3.25714	3.25714	3.4	2.71429	2.8	1.85714	2.34286	2.28571	3.34286	3.57143	1.48571	1.71429	1.14286	1.62857	2.51429	4.77143	5.34286	4.42857	3.68571	4.6	4.91429	4.71429	3.37143	2.6
	session4-10	0.571429	0.571429	0.571429	0.571429	0.6	0.6	0.571429	0.571429	0.914286	1.08571	1.2	1.51429	2.14286	1.85714	1.74286	2.05714	1.34286	0.514286	0.857143	0.571429	0.571429	0.428571	0	0	0	0	0	0	0	0	0	0	0	0	0	0	0	0	0	0	0	0	0	0	0	0	0	0
	session4-10	2.94286	1.71429	1.14286	1.54286	1.42857	1.11429	1.34286	1.34286	1.14286	2.08571	2.65714	3.57143	3.6	2.22857	1.34286	1	1.17143	1.14286	0.942857	0.628571	0.685714	0.6	0.571429	0.571429	0.571429	0.571429	0.228571	0	0	0	0	0	0	0	0	0	0	0	0	0	0	0	0	0	0	0	0	0
	session4-10	6.37143	6.08571	3.62857	3.2	2.97143	5.42857	3.37143	4.22857	3.45714	3.91429	3.37143	2.91429	4.91429	4.57143	3.62857	2.85714	13.0286	11.1143	5.45714	1.2	0	0.0285714	0.457143	0	0.2	0.542857	0.171429	0	0	0	0	0	0	0.571429	0.314286	0	0	0	0	0	0	0	0	0	0	0	0	0
	session4-10	2.8	3.25714	3.45714	2.82857	3.62857	3.6	4.22857	4.97143	4.34286	4.02857	4.8	3.91429	4.54286	3.8	3.97143	5.02857	4.31429	2.05714	1.28571	2.57143	3.68571	2.82857	2.91429	2.97143	2.02857	1.4	0.8	0.571429	0.571429	0.542857	0.6	0.571429	0.542857	0.257143	0	0	0	0.342857	0.571429	0.542857	0.6	0.257143	0	0	0	0	0	0
	session4-10	2.77143	2.22857	3.22857	3.08571	2.51429	2	2.25714	1.68571	1.42857	1.57143	1.85714	2.68571	2.77143	3.4	4.2	4.2	4.62857	3	2.4	2.11429	2.31429	2.25714	2.45714	2.11429	1.22857	1.2	1.25714	1.65714	1.14286	1.17143	1.28571	1.65714	1.77143	2.37143	2.22857	1.71429	1.14286	1.85714	2.48571	1.54286	0.0285714	0.485714	0.285714	0.257143	1.28571	1.6	1.85714	1.02857
	session4-10	2.88571	3.2	2.71429	3.28571	3.48571	3.45714	3.42857	2.85714	3	4.31429	3.88571	4.6	2.77143	2.2	1.4	1.2	2.11429	2.91429	3.22857	5.82857	5.8	3.97143	3.37143	6.57143	7.42857	7.11429	7.88571	7.48571	6.82857	6.62857	7.2	7.45714	9.51429	9.74286	9.8	8.91429	9.57143	14.6857	12.3429	11.2571	11.2571	10.6857	12.3143	12.7143	12.3143	10.5143	15.0571	14.8857
	session4-10	1.4	1.33333	2.13333	2.6	2.66667	1.46667	1.86667	2.66667	2.33333	2.26667	1.4	0.8	1.06667	1.26667	1.33333	1.4	1.33333	2.66667	2.6	2.2	1.53333	1.26667	1.4	1.13333	1.86667	1.26667	2.6	1.46667	0.666667	0	2.33333	4.06667	3.53333	0.866667	2.26667	3.8	3.73333	3.6	1.2	0	2.33333	4	3.33333	3.93333	4.4	6.93333	7.13333	5.13333
	session4-10	8.66	8.2	8.9	9.34	9.8	9.7	10.12	10.38	11	10.3	10.2	8.64	8.16	8.08	8.64	8.9	4.12	1.74	1.6	2.24	3.2	3.58	3.36	2.96	2.72	1.98	2.04	2.12	1.66	1.02	0.84	0.44	0.74	0.8	0.58	0.84	1.16	0.84	0.28	0.78	1.14	1.76	1.32	0.58	0.46	0.64	0.28	0.16
	session4-10	0.857143	1.17143	1.14286	1.34286	1.74286	1.65714	1.74286	1.48571	0.971429	0.514286	0.0285714	0.571429	0.571429	0.2	0	0.0285714	0.571429	0.171429	0	0.171429	0.6	0.571429	0.571429	0.571429	0.542857	1.05714	0.571429	0.571429	0.571429	0.542857	0.6	0.771429	0.571429	0.571429	0.771429	1.14286	0.571429	0.285714	0.828571	0.6	0	0	0	0	0	0	0	0
	session 1-3	4.01212	3.50909	3.38182	3.72121	3.68485	3.49697	3.78182	3.29091	2.41212	2.81818	2.46667	2.90909	2.91515	3.32121	3.68485	3.60606	3.85455	5.03636	5.43636	6	5.82424	6.01818	5.9697	5.46667	5.22424	4.67273	4.74545	4.02424	4.12727	4.89091	5.37576	4.87879	4.36364	4.15152	4.78788	4.88485	4.13333	3.89697	4.69697	4.96364	4.76364	3.71515	3.64242	3.24848	3.81212	4.17576	3.47273	3.38182
	session4-10	3.07236	2.9501	2.84821	2.85065	2.92956	2.96935	2.97538	3.07829	2.9872	3.10228	3.08681	3.04817	3.19716	2.92671	2.807	2.79831	3.23788	2.68478	2.20149	2.24202	2.3624	2.10687	2.18923	2.36105	2.43073	2.34288	2.54202	2.26139	2.10966	1.90524	2.13974	2.32079	2.62635	2.50437	2.27472	2.37506	2.39974	2.88667	2.66232	2.47869	2.65224	2.84518	2.73659	2.6529	2.72911	2.90224	3.35409	3.1048
[truncated: 48 more columns]

## Sheet: S3b Fig
	time(s)	-0.05	-0.049	-0.048	-0.047	-0.046	-0.045	-0.044	-0.043	-0.042	-0.041	-0.04	-0.039	-0.038	-0.037	-0.036	-0.035	-0.034	-0.033	-0.032	-0.031	-0.03	-0.029	-0.028	-0.027	-0.026	-0.025	-0.024	-0.023	-0.022	-0.021	-0.02	-0.019	-0.018	-0.017	-0.016	-0.015	-0.014	-0.013	-0.012	-0.011	-0.01	-0.009	-0.008	-0.007	-0.006	-0.005	-0.004	-0.003
	sessions 1-3	4.6	5.53333	5.4	3.73333	2.26667	1.26667	2.6	3.66667	3.66667	2	1.4	2.86667	5.93333	8.66667	6.6	5.33333	6.6	6.73333	6.93333	6.33333	4.46667	2.73333	5.93333	7.06667	5.73333	5	4.33333	2.46667	2.26667	2.6	4.33333	7.26667	6.73333	7.66667	7.13333	6.2	7.8	9.53333	10.7333	9.46667	8.4	8.6	8.86667	3.8	6.8	4	2.73333	2.86667
	sessions 1-3	6.06667	5.93333	4.6	3.86667	5.13333	6.33333	6.86667	7.86667	5	6	4.33333	5.53333	12.9333	13.2	16.2667	21.1333	27.0667	29.4	34.7333	36.6667	35.4	36	33.1333	29.8	29.4667	29.3333	32.7333	31.9333	27.2667	26.2	26.1333	24.6667	23	22.8	23.6667	23.2	22.2667	22.4	21.4667	20.4	16.4	20	23	17.9333	18.7333	15.8667	16.2	14.8667
	sessions 1-3	1.86667	4.53333	7.73333	5.33333	6.93333	5.93333	3.66667	3.46667	2.53333	2.8	2.33333	2.6	2.73333	2.33333	4.26667	5.13333	5.93333	4.6	2.46667	3.33333	2.73333	2.13333	1.6	2.46667	2.46667	2.33333	3.86667	5.6	5.13333	3.86667	1.26667	2.4	4.93333	4.33333	3.46667	2.33333	1.13333	3	4.06667	1.4	2.66667	3.86667	2.73333	2.8	2.8	3.2	4.13333	5.53333
	sessions 1-3	13.4	18.0667	15.8	12.2667	10.5333	11.2	9.66667	9.26667	6.86667	3.86667	1.86667	12.9333	24	24.3333	24.1333	20.8667	14.6667	9.6	7.33333	7.46667	6.86667	6.73333	6.33333	5.26667	4.93333	1.26667	1.4	1.2	1.26667	4.73333	4.46667	3.73333	2.8	2.6	4.13333	3.86667	5.66667	7.13333	8.66667	10.7333	10.9333	11	10.2	7.93333	7.66667	7.4	7.6	6.53333
	sessions 1-3	6.26667	5.86667	6.53333	2.53333	1.13333	0	0.933333	4.46667	3.2	1.46667	2.66667	0.466667	0	1.86667	8.8	6.46667	5.2	9.33333	8.73333	5.53333	3.13333	6.06667	4.53333	4.73333	3.8	2.86667	2.6	3.2	5.4	4.4	6.2	8.86667	9.46667	4.73333	2.93333	2.2	3.8	1.4	1.66667	4.06667	2.66667	4.53333	9.46667	10.0667	16.4	13.3333	11.6667	6.53333
	sessions 4-10	1.35	1.725	1.15	0.825	1.025	1.65	1.175	0.825	0.225	1.375	1.525	5.825	7.775	5.15	4.075	3.25	3.375	3	0.875	1.875	1.175	1.025	1.05	0.55	0.525	0.475	0.5	0.525	0.525	1.575	1.425	1.55	0.825	0.725	0.825	0.475	0.75	0.675	1.425	1.025	0.525	1.625	2.025	1.5	0.675	0.475	0.75	1.075
	sessions 4-10	7.65714	7.11429	6.65714	5.22857	3.34286	2	3.2	4.28571	3.6	4.6	3.05714	4.51429	8.14286	12	13.0571	13.6571	12.2571	9.4	8.08571	6	4.82857	4.05714	3.54286	5.34286	7.51429	8.74286	10.0286	9.65714	10.2571	10.8286	10.5429	10.7429	10.5714	10.8	10.7429	8.82857	10.5714	9.45714	11.2857	15.3714	16.2286	15.4857	14.3714	9.88571	9.51429	9.77143	11.1143	11.6
	sessions 4-10	0.314286	0.114286	0.171429	0	0.571429	1.31429	1.28571	0.828571	0.714286	0.0857143	0.742857	0.571429	0.857143	1.08571	1.14286	1.11429	1.08571	1.68571	1.08571	1.17143	1.14286	1.14286	0.971429	1.48571	1.68571	1.14286	1.14286	1.17143	1.02857	0.228571	0.0285714	0.0285714	0.428571	0.542857	0.514286	0.571429	0.571429	0.857143	1.05714	0.6	0.571429	0.571429	0.171429	0.314286	0	0	0	0.257143
	sessions 4-10	1.26667	2.46667	1.6	2	5.46667	4.06667	3.86667	5.26667	5.13333	3.4	1.4	2.93333	5.46667	3.13333	2.73333	2.13333	1.06667	1.26667	1.46667	1.33333	1.66667	2.2	5.13333	6.8	8.33333	7.53333	4.4	4.2	9.46667	9.66667	12.6667	13.6667	12	11.4	9.8	11.8667	13.4	12.9333	11.2667	10	14.4	18.8667	13.8	11.8	17.6	15	16.6	17.4
	sessions 4-10	11.3333	12.2667	11.9667	10.4333	10.1667	10.3333	10.7333	9.13333	10.3667	14.2667	13.2	9.16667	3.56667	2.16667	0.766667	1.33333	1.03333	0.7	0.666667	0.666667	0.633333	0.666667	0.7	0.666667	0.666667	0.633333	0.666667	0.7	0.666667	0.666667	0.633333	0.1	0	0	0	0	0.2	0.7	1.23333	1.16667	0.7	0.633333	0.266667	0	0	0.366667	0.6	0
	sessions 4-10	9.71429	8.82857	7.2	7.54286	7.25714	7.34286	6.2	4.91429	4.8	6.14286	7.94286	41.0286	60.1143	56.2	46.7429	22.0857	10.9429	5.2	4.31429	2.2	0.542857	0.142857	0	0	0.571429	0.571429	0.0857143	0	0	0	0	0	0	0	0	0	0	0	0	0	0	0	0	0	0.457143	0.542857	0.571429	0.0571429
	sessions 4-10	2.14286	2.6	1.57143	1.31429	1.88571	2.71429	1.37143	0.0571429	0	0	0	0	0.171429	0.542857	1.05714	0.6	0.228571	0.914286	1.22857	0.828571	0.0571429	0	0	0.2	0.6	0.342857	0.114286	0.142857	0.314286	0.742857	1.22857	0.857143	0.514286	0.514286	0.542857	0.542857	0.571429	0.228571	0.885714	1.08571	0.685714	2.22857	3.62857	2.42857	2.37143	2.14286	2.65714	2.57143
	sessions 1-3	6.44	7.98667	8.01333	5.54667	5.2	4.94667	4.74667	5.74667	4.25333	3.22667	2.52	4.88	9.12	10.08	12.0133	11.7867	11.8933	11.9333	12.04	11.8667	10.52	10.7333	10.3067	9.86667	9.28	8.16	8.98667	8.88	8.26667	8.36	8.48	9.38667	9.38667	8.42667	8.26667	7.56	8.13333	8.69333	9.32	9.21333	8.21333	9.6	10.8533	8.50667	10.48	8.76	8.46667	7.26667
	sessions 4-10	4.82551	5.0165	4.33095	3.90629	4.24507	4.20306	3.97602	3.61582	3.54847	4.26718	3.98112	9.14847	12.2991	11.4684	9.93929	6.31054	4.28418	3.16667	2.5318	2.01071	1.4352	1.31922	1.62823	2.14932	2.84235	2.77738	2.41973	2.34235	3.17976	3.3869	3.78929	3.84932	3.47704	3.42602	3.20357	3.1835	3.72347	3.55017	3.87908	4.1784	4.7301	5.6301	4.89473	3.70408	4.37398	4.04269	4.61327	4.70867
[truncated: 33 more columns]

## Sheet: S3c Fig
	time(s)	-12.8	-12.6	-12.4	-12.2	-12	-11.8	-11.6	-11.4	-11.2	-11	-10.8	-10.6	-10.4	-10.2	-10	-9.8	-9.6	-9.4	-9.2	-9	-8.8	-8.6	-8.4	-8.2	-8	-7.8	-7.6	-7.4	-7.2	-7	-6.8	-6.6	-6.4	-6.2	-6	-5.8	-5.6	-5.4	-5.2	-5	-4.8	-4.6	-4.4	-4.2	-4	-3.8	-3.6	-3.4
	session1-3	0	0	0	0	0	0	0	0	0	0	0	0	0	0	0	0	0	0	0	0	0	0	0	0	0	0.0666667	0.8	1.93333	4.86667	3.73333	4.66667	0.466667	3.73333	4.2	1.33333	3.93333	3.93333	3.73333	7.26667	7	7.4	7.4	5.46667	5.13333	3.53333	3.6	2.2	1.8
	session1-3	0	0	0	0	0	0	0	0	0	0	0	0	0	0	0	0	0	0	0	0	0	0	0	0	0	0	0	0	0.2	1.13333	1.4	0.266667	0	0	0	0	0	0	0	0	0	0.133333	1.33333	1.93333	1.4	1.33333	0.466667	0
	session1-3	0	0	0	0	0	0	0	0	0	0	0	0	0	0	0	0	0	0	0	0	0	0	0	0	0	0	0.4	0	0	0	0	0	0	0	0	0	0.733333	1.33333	0.466667	0	0	0	0	0	0	0	0	0
	session1-3	0	0	0	0	0	0	0	0	0	0	0	0	0	0	0	0	0	0	0	0	0	0	0	0	0	0.4	0.0666667	0	0.666667	3.26667	5.8	8.26667	10.3333	9.2	10.2	12.4	13.0667	10.1333	9.8	11.8	9.66667	10.4	10.8667	10.4667	13.2	13.9333	16.6	15.9333
	session1-3	0	0	0	0	0	0	0	0	0	0	0	0	0	0	0	0	0	0	0	0	0	0	0	0	0	0.733333	1.06667	1.53333	0	0	0	0.2	0.133333	0	0	0	0.333333	0.866667	0	0	1	3.66667	0.666667	1.13333	3.2	2.6	2.53333	2.06667
	session1-3	0	0	0	0	0	0	0	0	0	0	0	0	0	0	0	0	0	0	0	0	0	0	0	0	0	0	0.266667	1.06667	2.4	5.13333	8.13333	5.6	1.46667	3.86667	4.86667	6.93333	6.13333	6	8.86667	11.5333	12.0667	10.4	9.26667	11.3333	12.6	11	11.6	4.4
	session1-3	0	0	0	0	0	0	0	0	0	0	0	0	0	0	0	0	0	0	0	0	0	0	0	0	0	0.866667	2.26667	2.73333	1.93333	1.4	1.33333	3.26667	8.46667	9.4	8.8	10.0667	11.6	13.4	15.1333	18.0667	16.2	10.6	10.1333	10.1333	13.5333	11.6667	16.5333	18.8
	session1-3	0	0	0	0	0	0	0	0	0	0	0	0	0	0	0	0	0	0	0	0	0	0	0	0	0	0.4	0.6	0.0666667	0	0	0	0	0	0	0	0	0	0.533333	1.26667	0.866667	0	0	0	0	0	0	0	0
	session1-3	0	0	0	0	0	0	0	0	0	0	0	0	0	0	0	0	0	0	0	0	0	0	0	0	0	0	0	0	0	0	0	0	0	0	0	0	0	0	0	0	0	0	0	0	0	0	0	0
	session1-3	0	0	0	0	0	0	0	0	0	0	0	0	0	0	0	0	0	0	0	0	0	0	0	0	0	0.266667	0.2	1	2	2.8	2.6	1.73333	1.33333	1.26667	1.4	2.8	1.73333	1.33333	1.26667	0.866667	0	2.66667	0.333333	0	0	0	1.2	1.26667
	session1-3	0	0	0	0	0	0	0	0	0	0	0	0	0	0	0	0	0	0.0666667	0.933333	0	0.733333	0.733333	0	0.8	1.4	5.26667	1.6	1.6	4.53333	4.6	2.6	3.26667	3.6	4.4	8.6	4.53333	4.8	8.86667	6.4	6.73333	8.46667	9.2	11.2667	8.53333	6.13333	8.33333	11.0667	15.7333
	sessions4-10	0	0	0	0	0	0	0	0	0	0	0	0	0	0	0	0	0	0	0	0	0	0	0	0	0	0.216667	1.73333	3.9	4.81667	3.9	3.73333	5.73333	6.7	9.56667	11.8667	14.8667	12.3667	11.2333	10.8667	9.9	10.6667	10.5167	10.55	11.2833	10.1167	8.61667	11.1833	11.6167
	sessions4-10	0	0	0	0	0	0	0	0	0	0	0	0	0	0	0	0	0	0	0	0	0	0	0	0	0	0.125	0.1	0	0	0	0	0	0.25	0.2	0	0.3	0.15	0	0	0	0	0	0	0	0	0	0.15	0
	sessions4-10	0	0	0	0	0	0	0	0	0	0	0	0	0	0	0	0	0	0	0	0	0	0	0	0	0	1.11429	4.94286	2.48571	0.285714	0	0	0	0.2	0.0571429	0.571429	0.228571	0.514286	0.485714	0	0.485714	0.0857143	0	0	0	0.514286	0.571429	0.685714	1.6
	sessions4-10	0	0	0	0	0	0	0	0	0	0	0	0	0	0	0	0	0	0	0	0	0	0	0	0	0	0.428571	0.657143	7.25714	12.9143	16.4857	17.5143	20.9143	21.8	21.3143	23.2857	24.7429	26.2571	22.6857	20	19.0571	17.1714	16	16.8857	15.0571	14.0286	12.7714	14.4857	13.4571
	sessions4-10	0	0	0	0	0	0	0	0	0	0	0	0	0	0	0	0	0	0	0	0	0	0	0	0	0	6.71429	12.4	12.3714	12.1714	14.2	19.7143	23.4571	20.7143	23.6857	23.9429	22.1143	24.1429	27.6	29.8857	28.7143	24.2571	25.0857	24.1714	28.4	26.4857	25.5429	25.2286	28.6
	sessions4-10	0	0	0	0	0	0	0	0	0	0	0	0	0	0	0	0	0	0	0	0	0	0	0	0	0	0.657143	2.6	2.11429	2.68571	2.17143	2.37143	2	1.62857	1.28571	2.6	3.94286	3.54286	2.22857	1.94286	1.85714	4.6	6.68571	5.54286	6.74286	8.37143	8.65714	7.57143	5.4
	sessions4-10	0	0	0	0	0	0	0	0	0	0	0	0	0	0	0	0	0	0	0	0	0	0	0	0	0	1.34286	12.4571	12.0571	9.25714	8.74286	6.85714	8.22857	8.65714	8.28571	10.1429	12.5714	15.3143	17.0286	21.8571	25.7429	26.0286	26.0571	28.0571	26.3714	27	28.9429	30.8857	31.6
	sessions4-10	0	0	0	0	0	0	0	0	0	0	0	0	0	0	0	0	0	0	0	0	0	0	0	0	0	1.02857	1.8	0.314286	0	0	0.0571429	0.571429	0.342857	0	0.285714	0.4	1.02857	1.97143	1.45714	1.51429	0.657143	1.82857	2.17143	2.34286	0.657143	1.51429	1.51429	1.08571
	sessions4-10	0	0	0	0	0	0	0	0	0	0	0	0	0	0	0	0	0	0	0	0	0	0	0	0	0	0	0.0571429	0	0	0	0	0.257143	0	0	0	0	0	0.485714	0.371429	0	0	0	0	0	0	0.314286	0.6	0.571429
	sessions4-10	0	0	0	0	0	0	0	0	0	0	0	0	0	0	0	0	0	0	0	0	0	0	0	0	0	0.533333	0.666667	0	0	0	0	0	0	0	0	0	0	0	0	0	0	0.6	0	0	0.666667	0	0.266667	0.866667
	sessions4-10	0	0	0	0	0	0	0	0	0	0	0	0	0	0	0	0	0	0	0	0	0	0	0	0	0	0.04	0.5	0.94	0.34	0.46	0.2	0.46	0.14	0.36	0.3	0	0.34	0.68	1.36	1.96	1.06	1.38	1.92	1.58	2.22	1.52	1.04	0.9
	sessions4-10	0	0	0	0	0	0	0	0	0	0	0	0	0.257143	0.571429	0.342857	0	0	0	0	0	0.542857	0.571429	0.257143	0	0	2.34286	1.4	2.11429	1.85714	2.71429	7.54286	7.57143	7.31429	13.5714	13.5429	14.9143	16.0571	15	16.2	18.4	18.4	20.3143	18.4	20.9714	23.5143	26.5429	22.4571	26.3429
	session1-3	0	0	0	0	0	0	0	0	0	0	0	0	0	0	0	0	0	0.00606061	0.0848485	0	0.0666667	0.0666667	0	0.0727273	0.127273	0.727273	0.660606	0.90303	1.50909	2.00606	2.41212	2.09697	2.64242	2.93939	3.2	3.69697	3.84848	4.2	4.58788	5.1697	4.98182	4.95152	4.48485	4.42424	4.87273	4.7697	5.65455	5.45455
	sessions4-10	0	0	0	0	0	0	0	0	0	0	0	0	0.0214286	0.047619	0.0285714	0	0	0	0	0	0.0452381	0.047619	0.0214286	0	0	1.21196	3.27619	3.62952	3.69401	4.05619	4.83254	5.76611	5.6456	6.52722	7.21151	7.84008	8.30948	8.28325	8.66175	8.96929	8.57722	9.03901	8.97488	9.39575	9.46456	9.58282	9.67238	10.17
[truncated: 62 more columns]

## Sheet: S3d Fig
	time(s)	-15.6	-15.4	-15.2	-15	-14.8	-14.6	-14.4	-14.2	-14	-13.8	-13.6	-13.4	-13.2	-13	-12.8	-12.6	-12.4	-12.2	-12	-11.8	-11.6	-11.4	-11.2	-11	-10.8	-10.6	-10.4	-10.2	-10	-9.8	-9.6	-9.4	-9.2	-9	-8.8	-8.6	-8.4	-8.2	-8	-7.8	-7.6	-7.4	-7.2	-7	-6.8	-6.6	-6.4	-6.2
	sessions1-3	0	0	0	0	0	0	0	0	0	0	0	0	0	0	0	0	0	0	0	0	0	0	0	0	0	0	0	0	0	0	0	0	0	0	0	0	0	0	0	0	0.4	0	0	0	0	0	0	0
	sessions1-3	0	0	0	0	0	0	0	0	0	0	0	0	0	0	0	0	0	0	0	0	0	0	0	0	0	0	0	0	0	0	0	0	0	0	0	0	0	0	0	0	0	0	0	0	0	0	0	0
	sessions1-3	0	0	0	0	0	0	0	0	0	0	0	0	0	0	0	0	0	0	0	0	0	0	0	0	0	0	0	0	0	0	0	0	0	0	0	0	0	0	0	0	0	0	0	0	0	0	0	0
	sessions1-3	0	0	0	0	0	0	0	0	0	0	0	0	0	0	0	0	0	0	0	0	0	0	0	0	0	0	0	0	0	0	0	0	0	0	0	0	0	0	0	1.4	9.86667	7.8	8.53333	12.3333	12	3.66667	2.2	4.93333
	sessions1-3	0	0	0	0	0	0	0	0	0	0	0	0	0	0	0	0	0	0	0	0	0	0	0	0	0	0	0	0	0	0	0	0	0	0	0	0	0	0	0	0.133333	0.666667	0	0	0	0	0	0	0
	sessions4-10	0	0	0	0	0	0	0	0	0	0	0	0	0	0	0	0	0	0	0	0	0	0	0	0	0	0	0	0	0	0	0	0	0	0	0	0	0	0	0	0	0.075	0.075	0	0	0	0.125	0.075	0
	sessions4-10	0	0	0	0	0	0	0	0	0	0	0	0	0	0	0	0	0	0	0	0	0	0	0	0	0	0	0	0	0	0	0	0	0	0	0	0	0	0	0	0.0571429	1.4	2.54286	2.45714	2.82857	3.88571	4.65714	4.8	4.6
	sessions4-10	0	0	0	0	0	0	0	0	0	0	0	0	0	0	0	0	0	0	0	0	0	0	0	0	0	0	0	0	0	0	0	0	0	0	0	0	0	0	0	0.228571	1.08571	1.11429	0.771429	0.0857143	0.114286	0.485714	0.342857	0.314286
	sessions4-10	0	0	0	0	0	0	0	0	0	0	0	0	0	0	0	0	0	0	0	0	0	0	0	0	0	0	0	0	0	0	0	0	0	0	0	0	0	0	0	0	0	0	0	2.2	2.66667	2.66667	4	4.06667
	sessions4-10	0	0	0	0	0	0	0	0	0	0	0	0	0	0	0	0	0	0	0	0	0	0	0	0	0	0	0	0	0	0	0	0	0	0	0	0	0	0	0	0.1	0.0666667	0.5	0.7	0.733333	2	1.43333	0.933333	0.0333333
	sessions4-10	0	0	0	0	0	0	0	0	0	0	0	0	0	0	0	0	0	0	0	0	0	0	0	0	0	0	0	0	0	0	0	0	0	0	0	0	0	0	0	1.68571	9.82857	11.4286	12.6571	9.42857	9.74286	8.37143	4.6	6.65714
	sessions4-10	0	0	0	0	0	0	0	0	0	0	0	0	0	0	0	0	0	0	0	0	0	0	0	0	0	0	0	0	0	0	0	0	0	0	0	0	0	0	0	0	0	0	0	0	0.4	0.314286	1.6	0.857143
	sessions1-3	0	0	0	0	0	0	0	0	0	0	0	0	0	0	0	0	0	0	0	0	0	0	0	0	0	0	0	0	0	0	0	0	0	0	0	0	0	0	0	0.306667	2.18667	1.56	1.70667	2.46667	2.4	0.733333	0.44	0.986667
	sessions4-10	0	0	0	0	0	0	0	0	0	0	0	0	0	0	0	0	0	0	0	0	0	0	0	0	0	0	0	0	0	0	0	0	0	0	0	0	0	0	0	0.295918	1.77942	2.23724	2.36939	2.18231	2.68707	2.57908	2.33588	2.36122
[truncated: 81 more columns]

## Sheet: S3e Fig
	time(s)		-13.4	-13.3	-13.2	-13.1	-13	-12.9	-12.8	-12.7	-12.6	-12.5	-12.4	-12.3	-12.2	-12.1	-12	-11.9	-11.8	-11.7	-11.6	-11.5	-11.4	-11.3	-11.2	-11.1	-11	-10.9	-10.8	-10.7	-10.6	-10.5	-10.4	-10.3	-10.2	-10.1	-10	-9.9	-9.8	-9.7	-9.6	-9.5	-9.4	-9.3	-9.2	-9.1	-9	-8.9	-8.8
	sessions 1-3		-1.3898	0.314645	-0.145727	-0.166519	-0.664159	-0.716573	-0.642474	-1.38151	-0.177827	-0.503163	-0.363728	-0.940974	-0.513011	-0.136669	-0.628211	-0.288212	-0.455541	-1.35401	-1.63849	-0.485109	0.0658558	-0.308707	0.0403343	0.0564423	0.303595	0.531717	0.00621621	-0.0470202	-0.798722	0.12305	-0.0251731	0.860623	0.31036	-0.314119	-0.131779	0.55586	0.0154468	-0.691129	-0.329403	-0.250686	-0.405441	0.553983	-0.29659	-0.151721	-0.408335	0.0833259	-0.689098
	sessions 1-3		1.14169	1.27461	1.51885	1.67798	1.31653	1.84071	1.23096	1.0663	0.906543	1.25489	0.27671	-0.173989	-0.352537	-0.0526979	-0.462853	-0.256067	0.0591281	0.146086	0.48204	-0.208938	-0.148961	-0.817336	-0.862734	-1.53774	-0.850729	-1.40945	-1.70074	-1.45416	-1.1875	-1.90596	-2.20523	-1.19248	-1.16826	-1.31841	-1.34801	-1.93458	-1.71989	-0.346	-0.538778	-0.723103	-2.29471	-1.30926	-1.66196	-2.12188	-1.64252	0.925702	-1.19552
	sessions 1-3		0.883331	0.684749	0.0113456	-0.305614	0.00176538	0.58666	-1.40127	-0.22335	-0.46012	0.894211	0.6646	-0.220245	0.0581589	-0.351003	0.371261	-0.146055	-0.767563	-0.0432455	-1.10314	-2.10564	-1.12321	-2.29904	-1.99362	-1.90927	-2.72173	-2.02348	-1.9963	-2.59851	-1.28914	-1.85918	-1.11993	-2.20493	-1.95769	-1.85024	-2.16223	-1.61063	-2.23728	-2.47567	-2.27235	-1.26776	-2.95392	-2.76939	-2.15293	-2.74546	-2.29911	-2.10681	-3.73068
	sessions 1-3		-1.00665	-1.94206	-1.35113	-0.728557	-2.4793	-3.04938	-2.84563	-2.73733	-2.38696	-4.33828	-4.19326	-4.08733	-4.39236	-5.40199	-3.97148	-4.49923	-3.73959	-5.02699	-4.49345	-4.96023	-5.13382	-4.74006	-4.96993	-5.26497	-4.5912	-5.95776	-5.86368	-5.6038	-5.53399	-4.15637	-4.918	-6.70498	-5.75603	-5.73698	-6.31121	-7.27362	-5.83826	-6.70331	-6.34505	-6.42588	-5.20718	-5.16848	-5.54808	-5.91507	-4.70011	-3.56691	-4.09659
	sessions 1-3		3.98675	3.6262	3.53674	3.00382	2.98462	1.69085	2.66272	3.33181	3.90342	5.12446	3.43223	2.63795	1.7929	3.96285	3.13636	3.58331	2.26193	2.75053	2.62924	2.84149	2.75647	3.24659	2.88388	2.22241	2.81498	0.907075	0.371968	0.534283	1.0548	-0.297206	1.42505	1.36109	2.21051	0.338522	0.473964	0.122606	0.853047	1.42553	-0.276977	0.190513	0.374169	0.767889	-0.351108	-0.886994	-0.26644	0.10564	-0.0747225
	sessions 1-3		3.38389	2.96069	2.1099	2.95717	1.75475	3.3095	3.21839	1.24135	1.97817	2.39741	1.86338	2.11128	2.20103	2.85549	0.118448	-0.67158	1.07904	1.87195	1.64403	0.329945	0.659712	2.2696	2.01903	2.71271	2.0415	1.98033	1.62581	-0.804163	0.678238	-0.371632	-0.472804	-0.534667	0.00618748	1.11022	0.647895	0.843868	0.0463362	-0.702848	-0.450191	0.700873	-0.506687	0.975884	-0.146274	0.525946	-0.614678	0.142936	-0.0217454
	sessions 1-3		4.93596	5.65142	3.94746	5.1407	3.06817	3.1802	4.46132	4.52643	4.37609	5.50512	4.5906	3.95057	3.75533	3.12239	4.28567	3.53303	3.56979	1.91672	4.90685	3.43461	3.89617	2.94314	2.33541	2.43097	2.17471	1.39107	1.97232	2.09369	1.06921	0.303292	2.90292	1.45218	0.38521	0.727199	0.154378	-0.349031	-0.988177	-0.41157	0.816491	0.437991	0.714144	0.571385	-0.072157	0.915772	0.667036	0.237646	-0.539839
	sessions 1-3		1.51671	1.849	1.40973	-0.74738	1.58897	0.519283	-0.278885	1.16381	-0.0615759	-0.379776	-0.187816	0.398629	-1.50912	0.317354	-0.191836	0.800978	0.446485	0.223908	1.31765	1.9405	0.207635	1.29928	-0.140814	-0.136899	1.08595	-1.14146	-0.578567	1.13795	0.959908	-0.256048	-0.256239	-1.38334	1.02343	-0.187185	-1.63644	-0.661232	0.663474	-0.419583	-0.0836812	-1.22842	1.97532	1.02818	1.22866	-0.44612	-1.40767	-0.432072	-0.185943
	sessions 1-3		2.56673	0.760612	-1.04182	0.0193298	-3.17572	-2.6636	-1.89644	-1.51279	-2.31901	-2.61884	-3.57007	-3.37491	-3.18656	-4.96142	-2.58764	-3.87243	-0.920068	-3.22431	-0.600055	-0.318614	-3.08978	-4.24931	-3.37683	-1.86123	-3.17829	-1.68722	-0.527847	-2.41602	0.395942	-1.81604	-1.57257	0.665633	0.317953	-1.14902	-0.617212	-2.7218	-1.17765	-0.912331	-1.02002	-2.52641	-2.43368	-1.43764	-1.95033	-2.54959	-1.55813	-1.07102	-1.31265
	sessions 1-3		-1.69619	0.601529	-0.944758	-0.870528	-0.410257	-1.61743	-0.912816	-1.10335	-0.954995	-1.06805	-0.194799	-0.747732	-0.325003	-0.83456	-0.572673	-0.503101	-0.406808	0.0239954	0.255362	0.0789324	-0.551097	-0.730871	-0.683734	0.507786	-0.702163	0.814639	0.987151	-0.153348	0.346168	0.20696	0.695792	0.213941	1.17488	0.285789	0.475781	-0.141169	-0.318364	-1.44638	-0.766421	0.00551667	0.177196	-0.328718	0.440434	-0.545052	-0.324935	-0.173053	-0.533957
	sessions 1-3		0.389351	-0.317997	-1.03006	-0.42274	1.28578	1.5484	1.30475	2.20643	1.16371	3.6625	1.91542	2.48451	2.82309	4.17859	3.40596	2.19761	2.5042	2.97504	1.36835	0.0748229	1.59746	0.0379874	0.751159	0.670628	-1.87484	0.343664	-1.53693	0.49848	-0.25265	-0.170365	0.229666	1.48403	1.54747	1.53325	2.74725	3.04504	3.26879	3.75798	2.09071	3.07259	2.35096	1.1934	1.33646	3.07673	2.16198	3.16595	2.55547
	sessions 4-10		2.74963	2.92056	2.54936	3.11769	3.10688	2.79114	2.47088	2.30794	1.77006	1.92826	1.48324	1.16044	1.26733	1.53493	1.08731	1.25737	1.26906	0.730521	0.740434	0.683187	0.671036	0.155736	0.62478	0.246754	0.351199	0.268143	-0.0145564	0.0431749	-0.130927	0.0977963	-0.397672	0.301389	-0.076424	0.0293847	0.357033	0.109524	-0.538523	0.0986685	0.142968	-0.0263474	-0.250922	-0.428338	-0.500648	-0.155349	-0.374513	-0.418242	-0.17247
	sessions 4-10		-0.0219927	0.701824	0.212061	0.460032	0.236242	0.676118	0.173344	-0.00846474	0.0395206	-0.0664202	0.0677284	0.175667	0.213999	-0.122548	0.122085	0.00327847	0.227531	-0.365768	-0.359195	-0.519647	-0.622384	-0.772235	-0.784212	-0.428985	-0.855008	-0.492678	-0.853381	-1.06863	-0.896842	-0.608039	-0.772418	-0.427559	-0.588889	-1.01295	-0.591569	-0.962794	-1.21839	-1.25646	-1.60768	-1.54313	-1.30457	-1.18606	-1.11955	-0.82037	-1.40551	-1.24779	-1.46437
	sessions 4-10		0.102999	0.61226	0.552393	1.73084	1.3778	1.43976	1.24915	0.31067	0.151456	0.333944	-0.319047	0.48868	-0.0544775	-0.280009	-0.583465	0.24926	0.467311	-0.453652	-0.401547	-0.64641	0.000787751	-0.329314	-0.563449	-0.855145	-1.2479	-1.07881	-1.18432	-1.86581	-0.784269	-1.92536	-2.64932	-2.59052	-3.14362	-4.84038	-4.50376	-4.49568	-4.31165	-3.69523	-4.26947	-4.88103	-4.42835	-4.91736	-4.6481	-4.5875	-5.01136	-4.74893	-4.48058
	sessions 4-10		0.157348	0.231496	-0.195925	0.0811662	0.666343	0.0712273	0.434641	0.108476	0.649717	0.057307	-0.645317	-0.45187	0.00240313	-0.355826	-0.350464	-0.805257	-1.94241	-0.59004	-0.455655	-0.507585	-0.516486	-1.05339	-3.27031	-0.221398	-0.509385	-1.03877	1.0782	-0.942854	-0.601078	-0.522089	-0.44236	0.242064	-4.67288	-0.718985	-0.808025	-1.05276	-0.584807	-0.997679	-0.924495	-0.916425	-2.08481	-1.20332	-1.8506	-1.87779	-1.63021	-1.72352	-2.33203
	sessions 4-10		1.62081	2.41766	1.67967	1.78992	1.63705	2.25734	1.8895	1.61326	2.04875	2.0969	2.36632	1.97433	1.20929	1.97545	1.57122	1.68463	2.1974	1.78875	1.91775	1.49695	1.10745	1.10932	1.13946	0.726166	1.05783	0.64239	0.269426	0.135978	0.464523	-0.209055	-0.013148	-0.129014	-0.310886	-0.247343	-0.840455	-0.964585	-0.547712	-0.524464	-0.236571	-0.385858	0.0479682	0.0225075	-0.370154	0.256712	0.50399	0.389374	0.0371509
	sessions 4-10		0.513713	0.337424	0.665187	1.01352	1.43029	0.716159	1.22325	1.41629	0.448736	1.29672	0.501406	0.483296	0.662585	0.815759	0.854746	1.90165	1.42141	1.58402	0.930479	1.2117	0.00910714	0.506015	0.498714	1.18076	1.29031	-0.666348	0.760473	0.060908	1.0698	-0.00285324	0.450825	0.83806	1.11663	-0.510072	0.255413	0.546221	0.399689	0.468011	0.165996	-0.64868	-0.105458	0.162398	-0.351488	-0.484889	0.041839	0.156479	0.0711112
	sessions 4-10		3.70528	3.50941	2.50469	3.19603	3.35813	2.60431	2.65858	2.77533	2.92221	3.1966	3.60615	2.8404	2.79942	2.81264	2.46043	2.79016	2.31351	1.99562	2.05003	1.62171	2.40861	2.03561	2.17915	1.71938	1.78847	0.935525	1.23043	1.44687	0.923368	1.80595	1.37598	0.452746	0.681715	0.715705	0.42112	0.678217	0.0206724	0.029831	0.0211773	-0.464578	0.803685	0.557121	0.253688	0.416609	0.994191	0.0617065	-0.0772224
	sessions 4-10		2.07564	1.76247	2.67711	2.21853	2.9685	2.31513	2.53645	2.79306	1.6633	1.66029	1.86849	1.76996	1.46343	0.581419	0.815206	0.899448	1.28751	1.21488	0.322143	0.544329	0.0997568	-1.18744	-0.721291	0.166914	-1.13546	-0.776466	-0.493514	-0.37518	-0.179218	-0.629608	-0.879536	0.171759	-0.792056	-0.495224	0.27768	-0.170925	0.198857	-0.475121	-0.299183	0.188041	0.0966583	-0.825174	0.0056125	0.169728	-0.561582	0.854648	0.419634
	sessions 4-10		1.64836	2.09573	1.92487	2.27595	1.40852	1.34969	0.58248	0.621743	0.973374	1.47725	1.17479	0.163895	0.574357	0.668439	0.927556	0.591202	0.668406	0.307485	0.107624	0.618673	-0.247873	1.64775	1.69361	1.7755	1.13426	0.742423	0.120132	0.91424	0.418529	0.383804	-0.306225	-0.0202195	0.107846	0.407743	-0.132056	-0.377241	0.148159	-0.295766	-0.765432	0.0224665	-0.079227	0.143421	-0.134115	0.266249	-0.260675	-0.17934	-0.18525
	sessions 4-10		2.11854	4.4198	3.10178	3.99453	5.09126	2.26452	4.0099	4.68363	5.04109	4.34625	5.24089	2.99254	2.10244	2.28341	3.60433	2.82999	3.31141	3.97834	2.94978	2.49585	1.98935	1.96917	0.309135	-0.517108	-0.0874932	-0.0702056	-0.572442	-0.238008	-1.29341	-0.302443	0.802809	-2.06707	-1.40384	-1.04782	-1.84263	-2.47902	-2.46169	-1.56831	-1.31023	-4.03985	-1.69326	-2.01398	-2.46454	-1.9585	-1.86852	-2.46109	-2.93959
	sessions 4-10		1.59622	0.980234	0.970312	1.23191	0.821875	0.891891	0.613158	0.255462	0.444844	0.665499	0.381378	0.5582	0.629168	0.733417	0.180833	0.430695	0.23096	0.153746	-0.0474416	0.359433	-0.076931	-0.0621769	-0.322795	-0.151284	-0.135321	0.261738	0.0210316	-0.391467	-0.147685	-0.459904	-0.699666	-0.678483	-0.689568	-0.391608	-0.465293	-0.78074	-0.884902	-0.160851	-0.256438	0.00462393	-0.559288	0.187473	-0.374867	-0.704817	-0.796516	-0.414823	-0.792508
	sessions 4-10		1.71401	1.27858	1.46548	1.89335	0.769453	1.44334	1.12331	1.15549	0.910313	1.17685	1.06295	1.50045	1.17337	0.787753	1.17394	0.0152693	1.06603	1.32776	-0.148	0.399844	0.500876	1.23196	-0.349457	0.22482	-1.61162	-0.724663	-1.48768	-0.175985	-1.87872	-1.69502	-1.01612	-0.548223	-1.06489	-1.47956	-0.857364	-1.18826	-0.899175	-0.504036	-1.27688	-1.00123	-1.70295	-1.58986	-1.61757	-1.46372	-1.41268	-0.907378	-1.00546
	sessions 1-3		1.33743	1.40576	0.729139	0.868878	0.479197	0.420783	0.445513	0.597983	0.542495	0.902771	0.384842	0.185251	0.0319926	0.245303	0.26391	-0.0110687	0.330092	0.0236061	0.43349	0.056525	-0.0785063	-0.30443	-0.36344	-0.191742	-0.499839	-0.568261	-0.658235	-0.801148	-0.414339	-0.927227	-0.483319	-0.5439	-0.173272	-0.596452	-0.700691	-0.920427	-0.675684	-0.811391	-0.834153	-0.728616	-0.746348	-0.538433	-0.83399	-0.985768	-0.94481	-0.244425	-0.893207
	sessions 4-10		1.49838	1.77229	1.50892	1.91695	1.90603	1.56839	1.58039	1.50274	1.42195	1.51412	1.39908	1.138	1.00361	0.952902	0.988644	0.987308	1.04318	0.972637	0.633866	0.646502	0.443609	0.437584	0.0361121	0.322197	0.00332436	-0.166477	-0.0938503	-0.204731	-0.252994	-0.338902	-0.378904	-0.371256	-0.903072	-0.799259	-0.727492	-0.92817	-0.889956	-0.740117	-0.884686	-1.141	-0.938377	-0.924264	-1.09769	-0.91197	-0.981795	-0.886575	-1.0768
[truncated: 164 more columns]

## Sheet: S3f Fig
	time(s)	-10	-9.9	-9.8	-9.7	-9.6	-9.5	-9.4	-9.3	-9.2	-9.1	-9	-8.9	-8.8	-8.7	-8.6	-8.5	-8.4	-8.3	-8.2	-8.1	-8	-7.9	-7.8	-7.7	-7.6	-7.5	-7.4	-7.3	-7.2	-7.1	-7	-6.9	-6.8	-6.7	-6.6	-6.5	-6.4	-6.3	-6.2	-6.1	-6	-5.9	-5.8	-5.7	-5.6	-5.5	-5.4	-5.3
	session 1-3	-0.87585	-1.25662	-0.138959	-1.13404	0.189492	-0.102531	-0.794725	-1.30031	0.207795	-1.6579	-2.4125	-2.66714	-2.28329	-2.79716	-2.29074	-2.17698	-3.06254	-3.14676	-3.83182	-3.63511	-3.60184	-3.67752	0.448378	2.60492	3.45819	6.44692	7.63037	9.74122	10.5744	10.494	10.6473	13.337	16.6348	17.4537	20.3118	23.2499	26.8722	28.8919	31.4745	34.6794	35.6258	37.8543	40.0674	41.0154	42.8961	42.7233	41.0021	40.1498
	session 1-3	-1.2852	-3.58679	-3.08441	-4.76061	-3.65257	-2.2737	-3.2659	-3.655	-1.71375	-1.66364	-1.3829	-1.9781	-2.97372	-2.08125	-3.32947	-2.26987	-1.85903	-0.67531	-1.15014	-1.51425	0.0261413	-0.945266	5.2672	11.323	11.8336	13.1891	17.2427	16.7835	15.9233	14.3935	14.9477	14.3724	14.2598	11.8566	13.2538	9.47199	8.162	8.0931	5.83564	5.41623	4.55122	4.64107	3.48288	2.2698	0.337212	-0.0142727	-3.27893	-2.89123
	session 1-3	0.83887	0.139181	-0.270273	-0.917831	0.0819678	0.634141	-1.95502	-1.84333	2.06638	1.22591	0.765024	5.31852	-1.76455	-1.28452	-2.43206	-2.01953	0.966587	-0.317987	-1.20451	-1.24734	-0.594821	1.10343	1.21969	2.90699	3.10768	4.73158	7.92578	8.89001	9.88447	12.0843	11.9609	10.9887	11.6259	12.6058	12.4751	11.448	9.74491	9.03192	9.02028	8.20584	6.64747	6.49854	7.18956	5.60626	5.13046	4.50408	4.13444	3.33815
	session 1-3	-0.938195	0.262269	0.137261	0.705905	-0.2731	0.613761	2.28455	1.26676	-0.349457	0.182789	0.329752	-0.986314	1.44612	-1.30495	0.564734	0.398286	-1.54772	1.18748	-1.7176	-0.522981	0.21287	-1.24396	-1.30865	-2.41091	-1.24004	-1.98006	-0.779387	-3.33486	-1.15344	-1.81748	-0.125234	-1.95813	-1.34639	3.26984	3.19298	4.49882	5.42796	9.43806	8.72559	13.1234	14.8195	18.1946	16.995	17.9266	17.5352	19.6993	17.5468	18.9468
	session 1-3	0.59458	1.5133	0.272437	-0.307986	-0.462522	-0.32418	0.670451	1.4909	-0.432345	0.399099	-0.319685	-0.0678926	-1.38337	0.429545	0.484881	-0.132826	-0.463058	-2.45236	-0.384198	-0.6897	-1.9698	-3.80583	-2.14478	1.02934	3.12156	4.31327	3.85557	4.61374	5.05982	4.03676	2.84029	3.56649	3.46299	3.63437	1.14971	1.00515	-0.429887	0.0177203	-1.88864	-1.87451	0.375621	-2.03878	-1.20278	-0.593958	-0.0576192	0.134267	0.383822	1.29473
	session4-10	-1.00982	-1.33781	-0.543874	-0.712258	-0.952798	-1.9445	-1.07984	-0.639829	-0.799419	-1.10982	-2.25386	-2.77951	-1.32951	-2.69166	-1.08414	-1.25372	-1.85367	-2.43824	-2.05649	-2.20819	-2.80904	-1.57436	-0.304867	5.58131	9.46829	14.5714	16.8073	18.6327	20.8731	22.5615	25.0942	25.3394	27.5339	28.866	30.4829	31.4352	32.0508	34.4075	35.1153	35.7648	36.7704	36.4229	36.5412	38.8682	37.568	37.7387	36.6846	35.101
	session4-10	-1.19484	-1.12788	-2.55469	-2.21838	-1.14237	-1.69516	-2.78117	-2.70225	-1.9302	-1.79237	-0.901099	-3.11633	-2.40329	-2.47846	-2.33655	-2.54011	-1.79134	-1.63225	-2.07785	-1.6637	-0.0933511	1.73581	4.66651	10.3874	15.4338	18.5702	19.8834	21.0046	20.9043	20.8856	21.4292	20.4105	20.8245	19.3984	19.307	18.2543	18.0382	18.0258	16.5582	15.9413	16.4066	14.4145	14.3827	11.8713	12.0485	9.64229	8.04702	6.69339
	session4-10	0.259171	0.292637	-0.0113305	-0.0269034	0.0223183	-0.174646	-0.116654	0.341749	-0.1443	-0.442042	-0.468057	-0.704156	-0.516125	-0.366102	-0.5111	0.248394	0.0267235	0.0177444	0.431426	-0.186325	1.68611	2.89209	3.07322	3.88707	3.87134	4.17149	4.91065	6.07747	7.22581	9.2582	9.29389	9.65409	9.41916	9.98405	9.81499	9.19451	9.39195	8.8508	8.74705	7.98746	7.5031	7.47658	6.69837	5.85292	6.75983	6.35921	6.18996	6.70503
	session4-10	-1.2371	0.197763	2.09794	1.06918	1.20467	1.66144	-1.36416	-0.291807	0.485168	0.0741496	-0.780536	-0.982086	-1.07602	-2.72255	0.597754	-0.826413	-3.64104	-3.33005	-1.89023	-1.84051	0.953202	-5.35753	3.40281	3.70961	9.24698	11.9032	13.3267	15.7934	19.0373	14.1162	13.991	10.9709	13.1279	13.4207	11.1489	10.1155	4.17575	6.6462	2.41527	3.91068	1.57452	0.930142	-1.21725	0.589556	-1.12888	0.895116	1.36674	0.719377
	session4-10	1.50162	1.13261	-2.03382	-2.42197	-0.279947	-1.56049	-0.342216	-0.67249	-2.81227	-0.364807	-0.608808	-0.845504	0.873241	-0.435297	0.0512389	-1.71167	-2.68851	-2.59058	-2.86292	-0.562034	2.94127	-1.97807	-0.603097	2.51095	1.46201	-0.441632	0.282412	-0.260115	-2.10092	-0.34423	-0.61746	0.112089	1.71144	0.816874	1.93512	3.91662	5.31269	4.86226	9.14329	8.39721	8.42605	10.3919	9.41347	10.7744	10.4669	12.0572	11.6446	11.0696
	session4-10	0.762057	0.276045	0.905547	-0.266219	-0.463138	0.783878	-0.923787	-0.602642	0.906278	0.946539	1.09962	0.924351	0.285794	-0.87333	-0.842967	-0.398934	-1.44471	-1.35448	-1.63084	-1.4503	-1.96993	-2.96073	-0.0852356	1.09463	-1.68658	-1.19468	-0.984632	0.468908	0.568722	0.0219954	-1.22738	0.249401	1.09115	0.880254	2.03674	2.50707	4.47926	4.76184	5.41937	6.452	6.17888	7.45813	8.95874	8.44734	8.47593	9.35745	9.15467	8.38371
	session4-10	0.768945	0.769098	1.00716	1.13205	0.776905	1.41872	0.150965	-0.0963681	-0.381025	-0.612621	-0.24442	-0.0313376	-0.00642072	-0.974395	-0.77042	-0.359712	-0.594994	-0.554263	-0.76995	-0.395791	-0.885497	-2.4016	-0.379286	2.40354	5.44143	7.73227	10.254	11.6792	11.1081	11.3612	10.7945	10.2706	9.07222	9.82704	9.35118	9.43102	8.62684	9.18969	9.32687	7.89723	7.69099	8.38346	8.00267	8.29693	7.48357	7.19961	9.00697	9.29709
	session 1-3	-0.33316	-0.585732	-0.616788	-1.28291	-0.823346	-0.290501	-0.612129	-0.808195	-0.0442754	-0.302748	-0.604061	-0.0761862	-1.39176	-1.40767	-1.40053	-1.24018	-1.19315	-1.08099	-1.65765	-1.52188	-1.18549	-1.71383	0.696367	3.09066	4.0562	5.34017	7.175	7.33872	8.0577	7.83823	8.05418	8.0613	8.92744	9.76405	10.0767	9.93478	9.95543	11.0945	10.6335	11.9101	12.4039	13.03	13.3064	13.2448	13.1683	13.4093	11.9576	12.1677
	session4-10	-0.0214238	0.0289221	-0.161868	-0.492072	-0.119194	-0.215824	-0.922409	-0.666234	-0.667966	-0.471568	-0.593879	-1.07637	-0.596048	-1.50597	-0.699455	-0.977453	-1.71251	-1.69744	-1.55098	-1.18669	-0.0253202	-1.37777	1.39572	4.22493	6.17676	7.90176	9.21141	10.4852	11.0881	11.1229	11.2511	11.001	11.8258	11.8848	12.011	12.122	11.7251	12.392	12.3893	12.3358	12.0786	12.2111	11.8257	12.1001	11.6677	11.8928	11.7278	11.1385
[truncated: 143 more columns]
